# Supplementary material for: Of mice and men: the host response to influenza virus infection
Source: PubMed Central journal article supplement (PMC6132725; doi:10.1007/s00335-018-9750-y), 2018-06-15
Supplement: 335_2018_9750_MOESM2_ESM.pdf [file 335_2018_9750_MOESM2_ESM.pdf]

| des        | strain | day | sev_bi    |
|------------|--------|-----|-----------|
| CC001cd3_1 | CC001  | cd3 | control   |
| CC001cd3_2 | CC001  | cd3 | control   |
| CC001cd3_3 | CC001  | cd3 | control   |
| CC001d3_1  | CC001  | d3  | resistant |
| CC001d3_2  | CC001  | d3  | resistant |
| CC001d3_3  | CC001  | d3  | resistant |
| CC001d5_1  | CC001  | d5  | resistant |
| CC001d5_2  | CC001  | d5  | resistant |
| CC001d5_3  | CC001  | d5  | resistant |
| CC001d8_1  | CC001  | d8  | resistant |
| CC001d8_2  | CC001  | d8  | resistant |
| CC001d8_5  | CC001  | d8  | resistant |
| CC001d8_6  | CC001  | d8  | resistant |
| CC002cd3_3 | CC002  | cd3 | control   |
| CC002cd3_4 | CC002  | cd3 | control   |
| CC002cd3_5 | CC002  | cd3 | control   |
| CC002d3_2  | CC002  | d3  | severe    |
| CC002d3_3  | CC002  | d3  | severe    |
| CC002d3_4  | CC002  | d3  | severe    |
| CC002d5_2  | CC002  | d5  | severe    |
| CC002d5_6  | CC002  | d5  | severe    |
| CC002d5_7  | CC002  | d5  | severe    |
| CC002d8_3  | CC002  | d8  | severe    |
| CC002d8_4  | CC002  | d8  | severe    |
| CC002d8_5  | CC002  | d8  | severe    |
| CC003cd3_4 | CC003  | cd3 | control   |
| CC003cd3_5 | CC003  | cd3 | control   |
| CC003cd3_6 | CC003  | cd3 | control   |
| CC003d3_4  | CC003  | d3  | severe    |
| CC003d3_5  | CC003  | d3  | severe    |
| CC003d3_6  | CC003  | d3  | severe    |
| CC003d5_3  | CC003  | d5  | severe    |
| CC003d5_4  | CC003  | d5  | severe    |
| CC003d5_5  | CC003  | d5  | severe    |
| CC003d8_1  | CC003  | d8  | severe    |
| CC003d8_2  | CC003  | d8  | severe    |
| CC003d8_3  | CC003  | d8  | severe    |
| CC003d8_4  | CC003  | d8  | severe    |
| CC003d8_5  | CC003  | d8  | severe    |
| CC004cd3_2 | CC004  | cd3 | control   |
| CC004cd3_3 | CC004  | cd3 | control   |
| CC004cd3_4 | CC004  | cd3 | control   |
| CC004d3_1  | CC004  | d3  | severe    |
| CC004d3_2  | CC004  | d3  | severe    |
| CC004d3_3  | CC004  | d3  | severe    |
| CC004d5_4  | CC004  | d5  | severe    |
| CC004d5_5  | CC004  | d5  | severe    |
| CC004d5_6  | CC004  | d5  | severe    |
| CC005cd3_1 | CC005  | cd3 | control   |

|            |       |     |           |
|------------|-------|-----|-----------|
| CC005cd3_2 | CC005 | cd3 | control   |
| CC005cd3_3 | CC005 | cd3 | control   |
| CC005d3_1  | CC005 | d3  | resistant |
| CC005d3_2  | CC005 | d3  | resistant |
| CC005d3_3  | CC005 | d3  | resistant |
| CC005d5_1  | CC005 | d5  | resistant |
| CC005d5_2  | CC005 | d5  | resistant |
| CC005d5_3  | CC005 | d5  | resistant |
| CC005d8_1  | CC005 | d8  | resistant |
| CC005d8_2  | CC005 | d8  | resistant |
| CC005d8_3  | CC005 | d8  | resistant |
| CC006cd3_3 | CC006 | cd3 | control   |
| CC006cd3_5 | CC006 | cd3 | control   |
| CC006cd3_6 | CC006 | cd3 | control   |
| CC006d3_2  | CC006 | d3  | severe    |
| CC006d3_4  | CC006 | d3  | severe    |
| CC006d3_5  | CC006 | d3  | severe    |
| CC006d5_1  | CC006 | d5  | severe    |
| CC006d5_2  | CC006 | d5  | severe    |
| CC006d5_4  | CC006 | d5  | severe    |
| CC019cd3_1 | CC019 | cd3 | control   |
| CC019cd3_2 | CC019 | cd3 | control   |
| CC019cd3_3 | CC019 | cd3 | control   |
| CC019d3_1  | CC019 | d3  | severe    |
| CC019d3_2  | CC019 | d3  | severe    |
| CC019d3_3  | CC019 | d3  | severe    |
| CC019d5_2  | CC019 | d5  | severe    |
| CC019d5_3  | CC019 | d5  | severe    |
| CC019d5_4  | CC019 | d5  | severe    |
| CC019d5_5  | CC019 | d5  | severe    |
| CC019d5_6  | CC019 | d5  | severe    |
| CC019d8_1  | CC019 | d8  | severe    |
| CC019d8_3  | CC019 | d8  | severe    |
| CC019d8_4  | CC019 | d8  | severe    |
| CC036cd3_1 | CC036 | cd3 | control   |
| CC036cd3_2 | CC036 | cd3 | control   |
| CC036cd3_3 | CC036 | cd3 | control   |
| CC036d3_4  | CC036 | d3  | severe    |
| CC036d3_5  | CC036 | d3  | severe    |
| CC036d3_6  | CC036 | d3  | severe    |
| CC036d5_1  | CC036 | d5  | severe    |
| CC036d5_3  | CC036 | d5  | severe    |
| CC036d5_5  | CC036 | d5  | severe    |
| CC041cd3_1 | CC041 | cd3 | control   |
| CC041cd3_2 | CC041 | cd3 | control   |
| CC041cd3_3 | CC041 | cd3 | control   |
| CC041cd3_7 | CC041 | cd3 | control   |
| CC041d3_3  | CC041 | d3  | severe    |
| CC041d3_4  | CC041 | d3  | severe    |
| CC041d3_5  | CC041 | d3  | severe    |

|            |       |     |         |
|------------|-------|-----|---------|
| CC041d3_6  | CC041 | d3  | severe  |
| CC041d5_4  | CC041 | d5  | severe  |
| CC041d5_5  | CC041 | d5  | severe  |
| CC041d5_6  | CC041 | d5  | severe  |
| CC041d8_1  | CC041 | d8  | severe  |
| CC041d8_3  | CC041 | d8  | severe  |
| CC041d8_6  | CC041 | d8  | severe  |
| CC051cd3_2 | CC051 | cd3 | control |
| CC051cd3_3 | CC051 | cd3 | control |
| CC051cd3_5 | CC051 | cd3 | control |
| CC051d3_1  | CC051 | d3  | severe  |
| CC051d3_2  | CC051 | d3  | severe  |
| CC051d3_3  | CC051 | d3  | severe  |
| CC051d5_1  | CC051 | d5  | severe  |
| CC051d5_4  | CC051 | d5  | severe  |
| CC051d5_5  | CC051 | d5  | severe  |
| CC051d8_2  | CC051 | d8  | severe  |
| CC051d8_4  | CC051 | d8  | severe  |
| CC051d8_5  | CC051 | d8  | severe  |
| CC053cd3_4 | CC053 | cd3 | control |
| CC053cd3_5 | CC053 | cd3 | control |
| CC053cd3_6 | CC053 | cd3 | control |
| CC053d3_3  | CC053 | d3  | severe  |
| CC053d3_4  | CC053 | d3  | severe  |
| CC053d3_5  | CC053 | d3  | severe  |
| CC053d5_2  | CC053 | d5  | severe  |
| CC053d5_3  | CC053 | d5  | severe  |
| CC053d5_4  | CC053 | d5  | severe  |
