# Supplementary material for: Of mice and men: the host response to influenza virus infection
Source: PubMed Central journal article supplement (PMC6132725; doi:10.1007/s00335-018-9750-y), 2018-06-15
Supplement: 335_2018_9750_MOESM3_ESM.pdf [file 335_2018_9750_MOESM3_ESM.pdf]

| des                  | subject  | virus | time        | symptom | inf_stat |
|----------------------|----------|-------|-------------|---------|----------|
| T_93.5h_H3N2_015     | H3N2_015 | H3N2  | 93.5h       | y       | inf      |
| T_93.5h_H3N2_013     | H3N2_013 | H3N2  | 93.5h       | y       | inf      |
| T_93.5h_H3N2_012     | H3N2_012 | H3N2  | 93.5h       | y       | inf      |
| T_93.5h_H3N2_010     | H3N2_010 | H3N2  | 93.5h       | y       | inf      |
| T_93.5h_H3N2_008     | H3N2_008 | H3N2  | 93.5h       | y       | inf      |
| T_93.5h_H3N2_007     | H3N2_007 | H3N2  | 93.5h       | y       | inf      |
| T_93.5h_H3N2_006     | H3N2_006 | H3N2  | 93.5h       | y       | inf      |
| T_93.5h_H3N2_005     | H3N2_005 | H3N2  | 93.5h       | y       | inf      |
| T_93.5h_H3N2_001     | H3N2_001 | H3N2  | 93.5h       | y       | inf      |
| T_93.5h_H1N1_021     | H1N1_021 | H1N1  | 93.5h       | y       | inf      |
| T_93.5h_H1N1_020     | H1N1_020 | H1N1  | 93.5h       | y       | inf      |
| T_93.5h_H1N1_015     | H1N1_015 | H1N1  | 93.5h       | y       | inf      |
| T_93.5h_H1N1_013     | H1N1_013 | H1N1  | 93.5h       | y       | inf      |
| T_93.5h_H1N1_012     | H1N1_012 | H1N1  | 93.5h       | y       | inf      |
| T_93.5h_H1N1_010     | H1N1_010 | H1N1  | 93.5h       | y       | inf      |
| T_93.5h_H1N1_008     | H1N1_008 | H1N1  | 93.5h       | y       | inf      |
| T_93.5h_H1N1_007     | H1N1_007 | H1N1  | 93.5h       | y       | inf      |
| T_93.5h_H1N1_006     | H1N1_006 | H1N1  | 93.5h       | y       | inf      |
| T_93.5h_H1N1_005     | H1N1_005 | H1N1  | 93.5h       | y       | inf      |
| T_93.5h_H1N1_001     | H1N1_001 | H1N1  | 93.5h       | y       | inf      |
| T_45.5h_H3N2_015     | H3N2_015 | H3N2  | 45.5h       | y       | inf      |
| T_45.5h_H3N2_013     | H3N2_013 | H3N2  | 45.5h       | y       | inf      |
| T_45.5h_H3N2_012     | H3N2_012 | H3N2  | 45.5h       | y       | inf      |
| T_45.5h_H3N2_010     | H3N2_010 | H3N2  | 45.5h       | y       | inf      |
| T_45.5h_H3N2_008     | H3N2_008 | H3N2  | 45.5h       | y       | inf      |
| T_45.5h_H3N2_007     | H3N2_007 | H3N2  | 45.5h       | y       | inf      |
| T_45.5h_H3N2_006     | H3N2_006 | H3N2  | 45.5h       | y       | inf      |
| T_45.5h_H3N2_005     | H3N2_005 | H3N2  | 45.5h       | y       | inf      |
| T_45.5h_H3N2_001     | H3N2_001 | H3N2  | 45.5h       | y       | inf      |
| T_45.5h_H1N1_021     | H1N1_021 | H1N1  | 45.5h       | y       | inf      |
| T_45.5h_H1N1_020     | H1N1_020 | H1N1  | 45.5h       | y       | inf      |
| T_45.5h_H1N1_015     | H1N1_015 | H1N1  | 45.5h       | y       | inf      |
| T_45.5h_H1N1_013     | H1N1_013 | H1N1  | 45.5h       | y       | inf      |
| T_45.5h_H1N1_012     | H1N1_012 | H1N1  | 45.5h       | y       | inf      |
| T_45.5h_H1N1_010     | H1N1_010 | H1N1  | 45.5h       | y       | inf      |
| T_45.5h_H1N1_008     | H1N1_008 | H1N1  | 45.5h       | y       | inf      |
| T_45.5h_H1N1_007     | H1N1_007 | H1N1  | 45.5h       | y       | inf      |
| T_45.5h_H1N1_006     | H1N1_006 | H1N1  | 45.5h       | y       | inf      |
| T_45.5h_H1N1_005     | H1N1_005 | H1N1  | 45.5h       | y       | inf      |
| T_45.5h_H1N1_001     | H1N1_001 | H1N1  | 45.5h       | y       | inf      |
| pre.ch.basl_H3N2_015 | H3N2_015 | H3N2  | pre-ch-basl | y       | cntrl    |
| pre.ch.basl_H3N2_013 | H3N2_013 | H3N2  | pre-ch-basl | y       | cntrl    |
| pre.ch.basl_H3N2_012 | H3N2_012 | H3N2  | pre-ch-basl | y       | cntrl    |
| pre.ch.basl_H3N2_010 | H3N2_010 | H3N2  | pre-ch-basl | y       | cntrl    |
| pre.ch.basl_H3N2_008 | H3N2_008 | H3N2  | pre-ch-basl | y       | cntrl    |
| pre.ch.basl_H3N2_007 | H3N2_007 | H3N2  | pre-ch-basl | y       | cntrl    |
| pre.ch.basl_H3N2_006 | H3N2_006 | H3N2  | pre-ch-basl | y       | cntrl    |
| pre.ch.basl_H3N2_005 | H3N2_005 | H3N2  | pre-ch-basl | y       | cntrl    |
| pre.ch.basl_H3N2_001 | H3N2_001 | H3N2  | pre-ch-basl | y       | cntrl    |

|                      |          |      |             |   |       |
|----------------------|----------|------|-------------|---|-------|
| pre.ch.basl_H1N1_021 | H1N1_021 | H1N1 | pre-ch-basl | y | cntrl |
| pre.ch.basl_H1N1_020 | H1N1_020 | H1N1 | pre-ch-basl | y | cntrl |
| pre.ch.basl_H1N1_015 | H1N1_015 | H1N1 | pre-ch-basl | y | cntrl |
| pre.ch.basl_H1N1_013 | H1N1_013 | H1N1 | pre-ch-basl | y | cntrl |
| pre.ch.basl_H1N1_012 | H1N1_012 | H1N1 | pre-ch-basl | y | cntrl |
| pre.ch.basl_H1N1_010 | H1N1_010 | H1N1 | pre-ch-basl | y | cntrl |
| pre.ch.basl_H1N1_008 | H1N1_008 | H1N1 | pre-ch-basl | y | cntrl |
| pre.ch.basl_H1N1_007 | H1N1_007 | H1N1 | pre-ch-basl | y | cntrl |
| pre.ch.basl_H1N1_006 | H1N1_006 | H1N1 | pre-ch-basl | y | cntrl |
| pre.ch.basl_H1N1_005 | H1N1_005 | H1N1 | pre-ch-basl | y | cntrl |
| pre.ch.basl_H1N1_001 | H1N1_001 | H1N1 | pre-ch-basl | y | cntrl |
