# Supplementary material for: Of mice and men: the host response to influenza virus infection
Source: PubMed Central journal article supplement (PMC6132725; doi:10.1007/s00335-018-9750-y), 2018-06-15
Supplement: 335_2018_9750_MOESM4_ESM.pdf [file 335_2018_9750_MOESM4_ESM.pdf]

| sample_ID  | subject.ID | time     | sex    | pthgn | inf_stat |
|------------|------------|----------|--------|-------|----------|
| JR0021_bsl | JR0021     | Baseline | female | Flu   | cntrl    |
| JR0021_d2  | JR0021     | Day2     | female | Flu   | inf      |
| JR0021_d4  | JR0021     | Day4     | female | Flu   | inf      |
| JR0021_d6  | JR0021     | Day6     | female | Flu   | inf      |
| JR0023_bsl | JR0023     | Baseline | female | Flu   | cntrl    |
| JR0023_d2  | JR0023     | Day2     | female | Flu   | inf      |
| JR0023_d4  | JR0023     | Day4     | female | Flu   | inf      |
| JR0023_d6  | JR0023     | Day6     | female | Flu   | inf      |
| JR0035_bsl | JR0035     | Baseline | female | Flu   | cntrl    |
| JR0035_d2  | JR0035     | Day2     | female | Flu   | inf      |
| JR0035_d4  | JR0035     | Day4     | female | Flu   | inf      |
| JR0035_d6  | JR0035     | Day6     | female | Flu   | inf      |
| JR0053_bsl | JR0053     | Baseline | male   | Flu   | cntrl    |
| JR0053_d2  | JR0053     | Day2     | male   | Flu   | inf      |
| JR0053_d4  | JR0053     | Day4     | male   | Flu   | inf      |
| JR0053_d6  | JR0053     | Day6     | male   | Flu   | inf      |
| JR0080_bsl | JR0080     | Baseline | female | Flu   | cntrl    |
| JR0080_d2  | JR0080     | Day2     | female | Flu   | inf      |
| JR0080_d4  | JR0080     | Day4     | female | Flu   | inf      |
| JR0080_d6  | JR0080     | Day6     | female | Flu   | inf      |
| JR0082_bsl | JR0082     | Baseline | male   | Flu   | cntrl    |
| JR0082_d2  | JR0082     | Day2     | male   | Flu   | inf      |
| JR0082_d4  | JR0082     | Day4     | male   | Flu   | inf      |
| JR0082_d6  | JR0082     | Day6     | male   | Flu   | inf      |
| JR0158_bsl | JR0158     | Baseline | male   | Flu   | cntrl    |
| JR0158_d2  | JR0158     | Day2     | male   | Flu   | inf      |
| JR0158_d4  | JR0158     | Day4     | male   | Flu   | inf      |
| JR0158_d6  | JR0158     | Day6     | male   | Flu   | inf      |
| JR0167_bsl | JR0167     | Baseline | male   | Flu   | cntrl    |
| JR0167_d2  | JR0167     | Day2     | male   | Flu   | inf      |
| JR0167_d4  | JR0167     | Day4     | male   | Flu   | inf      |
| JR0167_d6  | JR0167     | Day6     | male   | Flu   | inf      |
| JR0198_bsl | JR0198     | Baseline | male   | Flu   | cntrl    |
| JR0198_d2  | JR0198     | Day2     | male   | Flu   | inf      |
| JR0198_d4  | JR0198     | Day4     | male   | Flu   | inf      |
| JR0198_d6  | JR0198     | Day6     | male   | Flu   | inf      |
| JR0215_bsl | JR0215     | Baseline | male   | Flu   | cntrl    |
| JR0215_d2  | JR0215     | Day2     | male   | Flu   | inf      |
| JR0215_d6  | JR0215     | Day6     | male   | Flu   | inf      |
| JR0225_bsl | JR0225     | Baseline | female | Flu   | cntrl    |
| JR0225_d2  | JR0225     | Day2     | female | Flu   | inf      |
| JR0225_d4  | JR0225     | Day4     | female | Flu   | inf      |
| JR0225_d6  | JR0225     | Day6     | female | Flu   | inf      |
| JR0251_bsl | JR0251     | Baseline | female | Flu   | cntrl    |
| JR0251_d2  | JR0251     | Day2     | female | Flu   | inf      |
| JR0251_d4  | JR0251     | Day4     | female | Flu   | inf      |
| JR0251_d6  | JR0251     | Day6     | female | Flu   | inf      |
| JR0271_bsl | JR0271     | Baseline | female | Flu   | cntrl    |
| JR0271_d2  | JR0271     | Day2     | female | Flu   | inf      |

|            |        |          |        |     |       |
|------------|--------|----------|--------|-----|-------|
| JR0271_d4  | JR0271 | Day4     | female | Flu | inf   |
| JR0271_d6  | JR0271 | Day6     | female | Flu | inf   |
| JR0302_bsl | JR0302 | Baseline | female | Flu | cntrl |
| JR0302_d2  | JR0302 | Day2     | female | Flu | inf   |
| JR0302_d4  | JR0302 | Day4     | female | Flu | inf   |
| JR0302_d6  | JR0302 | Day6     | female | Flu | inf   |
| JR0308_bsl | JR0308 | Baseline | female | Flu | cntrl |
| JR0308_d2  | JR0308 | Day2     | female | Flu | inf   |
| JR0308_d4  | JR0308 | Day4     | female | Flu | inf   |
| JR0308_d6  | JR0308 | Day6     | female | Flu | inf   |
| JR0315_bsl | JR0315 | Baseline | female | Flu | cntrl |
| JR0315_d2  | JR0315 | Day2     | female | Flu | inf   |
| JR0315_d4  | JR0315 | Day4     | female | Flu | inf   |
| JR0315_d6  | JR0315 | Day6     | female | Flu | inf   |
| JR0357_bsl | JR0357 | Baseline | female | Flu | cntrl |
| JR0357_d2  | JR0357 | Day2     | female | Flu | inf   |
| JR0357_d4  | JR0357 | Day4     | female | Flu | inf   |
| JR0357_d6  | JR0357 | Day6     | female | Flu | inf   |
| JR0373_bsl | JR0373 | Baseline | female | Flu | cntrl |
| JR0373_d2  | JR0373 | Day2     | female | Flu | inf   |
| JR0373_d4  | JR0373 | Day4     | female | Flu | inf   |
| JR0393_bsl | JR0393 | Baseline | male   | Flu | cntrl |
| JR0393_d2  | JR0393 | Day2     | male   | Flu | inf   |
| JR0393_d4  | JR0393 | Day4     | male   | Flu | inf   |
| JR0393_d6  | JR0393 | Day6     | male   | Flu | inf   |
| JR0487_bsl | JR0487 | Baseline | female | Flu | cntrl |
| JR0487_d2  | JR0487 | Day2     | female | Flu | inf   |
| JR0487_d4  | JR0487 | Day4     | female | Flu | inf   |
| JR0487_d6  | JR0487 | Day6     | female | Flu | inf   |
| JR0488_bsl | JR0488 | Baseline | female | Flu | cntrl |
| JR0488_d2  | JR0488 | Day2     | female | Flu | inf   |
| JR0488_d4  | JR0488 | Day4     | female | Flu | inf   |
| JR0488_d6  | JR0488 | Day6     | female | Flu | inf   |
| JR0516_bsl | JR0516 | Baseline | female | Flu | cntrl |
| JR0516_d2  | JR0516 | Day2     | female | Flu | inf   |
| JR0516_d4  | JR0516 | Day4     | female | Flu | inf   |
| JR0516_d6  | JR0516 | Day6     | female | Flu | inf   |
| JR0538_bsl | JR0538 | Baseline | male   | Flu | cntrl |
| JR0538_d2  | JR0538 | Day2     | male   | Flu | inf   |
| JR0538_d4  | JR0538 | Day4     | male   | Flu | inf   |
| JR0538_d6  | JR0538 | Day6     | male   | Flu | inf   |
| JR0608_d2  | JR0608 | Day2     | male   | Flu | inf   |
| JR0608_d4  | JR0608 | Day4     | male   | Flu | inf   |
| JR0608_d6  | JR0608 | Day6     | male   | Flu | inf   |
| JR1089_bsl | JR1089 | Baseline | male   | Flu | cntrl |
| JR1089_d2  | JR1089 | Day2     | male   | Flu | inf   |
| JR1089_d4  | JR1089 | Day4     | male   | Flu | inf   |
| JR1089_d6  | JR1089 | Day6     | male   | Flu | inf   |
| JR1132_bsl | JR1132 | Baseline | female | Flu | cntrl |
| JR1132_d2  | JR1132 | Day2     | female | Flu | inf   |

|            |        |          |        |     |       |
|------------|--------|----------|--------|-----|-------|
| JR1132_d4  | JR1132 | Day4     | female | Flu | inf   |
| JR1132_d6  | JR1132 | Day6     | female | Flu | inf   |
| JR1182_bsl | JR1182 | Baseline | male   | Flu | cntrl |
| JR1182_d2  | JR1182 | Day2     | male   | Flu | inf   |
| JR1182_d4  | JR1182 | Day4     | male   | Flu | inf   |
| JR1182_d6  | JR1182 | Day6     | male   | Flu | inf   |
| JR1189_bsl | JR1189 | Baseline | female | Flu | cntrl |
| JR1189_d2  | JR1189 | Day2     | female | Flu | inf   |
| JR1189_d4  | JR1189 | Day4     | female | Flu | inf   |
| JR1189_d6  | JR1189 | Day6     | female | Flu | inf   |
| JR1200_bsl | JR1200 | Baseline | female | Flu | cntrl |
| JR1200_d2  | JR1200 | Day2     | female | Flu | inf   |
| JR1200_d4  | JR1200 | Day4     | female | Flu | inf   |
| JR1200_d6  | JR1200 | Day6     | female | Flu | inf   |
| JR1273_bsl | JR1273 | Baseline | female | Flu | cntrl |
| JR1273_d2  | JR1273 | Day2     | female | Flu | inf   |
| JR1273_d4  | JR1273 | Day4     | female | Flu | inf   |
| JR1273_d6  | JR1273 | Day6     | female | Flu | inf   |
| JR1407_bsl | JR1407 | Baseline | male   | Flu | cntrl |
| JR1407_d2  | JR1407 | Day2     | male   | Flu | inf   |
| JR1407_d4  | JR1407 | Day4     | male   | Flu | inf   |
| JR1407_d6  | JR1407 | Day6     | male   | Flu | inf   |
| JR1412_bsl | JR1412 | Baseline | male   | Flu | cntrl |
| JR1412_d2  | JR1412 | Day2     | male   | Flu | inf   |
| JR1412_d4  | JR1412 | Day4     | male   | Flu | inf   |
| JR1412_d6  | JR1412 | Day6     | male   | Flu | inf   |
| JR1463_bsl | JR1463 | Baseline | female | Flu | cntrl |
| JR1463_d2  | JR1463 | Day2     | female | Flu | inf   |
| JR1463_d4  | JR1463 | Day4     | female | Flu | inf   |
| JR1463_d6  | JR1463 | Day6     | female | Flu | inf   |
| JR1484_bsl | JR1484 | Baseline | male   | Flu | cntrl |
| JR1484_d2  | JR1484 | Day2     | male   | Flu | inf   |
| JR1484_d4  | JR1484 | Day4     | male   | Flu | inf   |
| JR1484_d6  | JR1484 | Day6     | male   | Flu | inf   |
| JR1491_bsl | JR1491 | Baseline | male   | Flu | cntrl |
| JR1491_d2  | JR1491 | Day2     | male   | Flu | inf   |
| JR1491_d4  | JR1491 | Day4     | male   | Flu | inf   |
| JR1491_d6  | JR1491 | Day6     | male   | Flu | inf   |
| JR1527_bsl | JR1527 | Baseline | male   | Flu | cntrl |
| JR1527_d2  | JR1527 | Day2     | male   | Flu | inf   |
| JR1527_d4  | JR1527 | Day4     | male   | Flu | inf   |
| JR1527_d6  | JR1527 | Day6     | male   | Flu | inf   |
| JR1539_bsl | JR1539 | Baseline | female | Flu | cntrl |
| JR1539_d2  | JR1539 | Day2     | female | Flu | inf   |
| JR1727_bsl | JR1727 | Baseline | female | Flu | cntrl |
| JR1727_d2  | JR1727 | Day2     | female | Flu | inf   |
| JR1727_d4  | JR1727 | Day4     | female | Flu | inf   |
| JR1727_d6  | JR1727 | Day6     | female | Flu | inf   |
| JR1759_bsl | JR1759 | Baseline | male   | Flu | cntrl |
| JR1759_d2  | JR1759 | Day2     | male   | Flu | inf   |

|            |        |          |        |     |       |
|------------|--------|----------|--------|-----|-------|
| JR1759_d6  | JR1759 | Day6     | male   | Flu | inf   |
| JR1760_bsl | JR1760 | Baseline | male   | Flu | cntrl |
| JR1760_d2  | JR1760 | Day2     | male   | Flu | inf   |
| JR1760_d4  | JR1760 | Day4     | male   | Flu | inf   |
| JR1760_d6  | JR1760 | Day6     | male   | Flu | inf   |
| JR1784_bsl | JR1784 | Baseline | female | Flu | cntrl |
| JR1784_d2  | JR1784 | Day2     | female | Flu | inf   |
| JR1784_d4  | JR1784 | Day4     | female | Flu | inf   |
| JR1784_d6  | JR1784 | Day6     | female | Flu | inf   |
| JR1818_bsl | JR1818 | Baseline | male   | Flu | cntrl |
| JR1818_d2  | JR1818 | Day2     | male   | Flu | inf   |
| JR1825_bsl | JR1825 | Baseline | female | Flu | cntrl |
| JR1825_d2  | JR1825 | Day2     | female | Flu | inf   |
| JR1825_d4  | JR1825 | Day4     | female | Flu | inf   |
| JR1825_d6  | JR1825 | Day6     | female | Flu | inf   |
| JR1866_bsl | JR1866 | Baseline | female | Flu | cntrl |
| JR1866_d2  | JR1866 | Day2     | female | Flu | inf   |
| JR1866_d4  | JR1866 | Day4     | female | Flu | inf   |
| JR1866_d6  | JR1866 | Day6     | female | Flu | inf   |
| JR1905_bsl | JR1905 | Baseline | female | Flu | cntrl |
| JR1905_d2  | JR1905 | Day2     | female | Flu | inf   |
| JR1905_d4  | JR1905 | Day4     | female | Flu | inf   |
| JR1905_d6  | JR1905 | Day6     | female | Flu | inf   |
| JR1939_bsl | JR1939 | Baseline | male   | Flu | cntrl |
| JR1939_d2  | JR1939 | Day2     | male   | Flu | inf   |
| JR1939_d4  | JR1939 | Day4     | male   | Flu | inf   |
| JR1939_d6  | JR1939 | Day6     | male   | Flu | inf   |
| JR1978_bsl | JR1978 | Baseline | male   | Flu | cntrl |
| JR1978_d2  | JR1978 | Day2     | male   | Flu | inf   |
| JR1978_d4  | JR1978 | Day4     | male   | Flu | inf   |
| JR1978_d6  | JR1978 | Day6     | male   | Flu | inf   |
| JR1981_bsl | JR1981 | Baseline | male   | Flu | cntrl |
| JR1981_d2  | JR1981 | Day2     | male   | Flu | inf   |
| JR1981_d4  | JR1981 | Day4     | male   | Flu | inf   |
| JR1981_d6  | JR1981 | Day6     | male   | Flu | inf   |
| JR1995_bsl | JR1995 | Baseline | female | Flu | cntrl |
| JR1995_d2  | JR1995 | Day2     | female | Flu | inf   |
| JR1995_d4  | JR1995 | Day4     | female | Flu | inf   |
| JR1995_d6  | JR1995 | Day6     | female | Flu | inf   |
