# Supplementary material for: Of mice and men: the host response to influenza virus infection
Source: PubMed Central journal article supplement (PMC6132725; doi:10.1007/s00335-018-9750-y), 2018-06-15
Supplement: 335_2018_9750_MOESM5_ESM.pdf [file 335_2018_9750_MOESM5_ESM.pdf]

| des_ID     | Flu_detection    | age | sex |
|------------|------------------|-----|-----|
| INFG_ID_51 | healthy_controls | 50  | f   |
| INFG_ID_52 | healthy_controls | 47  | f   |
| INFG_ID_53 | healthy_controls | 43  | m   |
| INFG_ID_54 | healthy_controls | 67  | m   |
| INFG_ID_55 | healthy_controls | 59  | f   |
| INFG_ID_56 | healthy_controls | 45  | f   |
| INFG_ID_57 | healthy_controls | 27  | f   |
| INFG_ID_58 | healthy_controls | 29  | m   |
| INFG_ID_59 | healthy_controls | 48  | f   |
| INFG_ID_60 | healthy_controls | 37  | f   |
| INFG_ID_62 | healthy_controls | 50  | f   |
| INFG_ID_63 | healthy_controls | 30  | m   |
| INFG_ID_64 | healthy_controls | 56  | m   |
| INFG_ID_65 | healthy_controls | 30  | f   |
| INFG_ID_66 | healthy_controls | 58  | m   |
| INFG_ID_2  | Influenza B      | 92  | m   |
| INFG_ID_4  | Influenza A      | 24  | f   |
| INFG_ID_5  | Influenza A      | 69  | m   |
| INFG_ID_7  | Influenza A      | 55  | f   |
| INFG_ID_8  | Influenza A      | 60  | f   |
| INFG_ID_9  | Influenza A      | 47  | m   |
| INFG_ID_11 | Influenza A      | 51  | f   |
| INFG_ID_17 | Influenza A      | 26  | f   |
| INFG_ID_20 | Influenza A      | 49  | m   |
| INFG_ID_21 | Influenza A      | 29  | f   |
| INFG_ID_22 | Influenza B      | 75  | f   |
| INFG_ID_23 | Influenza A      | 45  | m   |
| INFG_ID_28 | Influenza B      | 62  | m   |
| INFG_ID_30 | Influenza A      | 73  | f   |
| INFG_ID_31 | Influenza A      | 74  | f   |
| INFG_ID_33 | Influenza A      | 75  | m   |
| INFG_ID_34 | Influenza A      | 67  | m   |
| INFG_ID_35 | Influenza A      | 90  | m   |
| INFG_ID_36 | Influenza A      | 72  | f   |
| INFG_ID_38 | Influenza A      | 32  | m   |
| INFG_ID_39 | Influenza A      | 58  | m   |
| INFG_ID_40 | Influenza B      | 83  | m   |
| INFG_ID_41 | Influenza A      | 70  | m   |
| INFG_ID_42 | Influenza A      | 80  | m   |
