# Supplementary material for: Of mice and men: the host response to influenza virus infection
Source: PubMed Central journal article supplement (PMC6132725; doi:10.1007/s00335-018-9750-y), 2018-06-15
Supplement: 335_2018_9750_MOESM6_ESM.pdf [file 335_2018_9750_MOESM6_ESM.pdf]

| PROBE         | ACCNUM       | SYMBOL        | ENTREZID  | logFC       | AveExpr     | adj.P.Val   |
|---------------|--------------|---------------|-----------|-------------|-------------|-------------|
| A_51_P421876  | NM_016850    | Irf7          | 54123     | 3,398893189 | 9,663735849 | 2,29E-07    |
| A_51_P387123  | NM_011854    | Oasl2         | 23962     | 3,264877709 | 8,735339623 | 1,45E-10    |
| A_51_P327751  | NM_008331    | Ifit1         | 15957     | 2,513472136 | 8,159320755 | 9,22E-08    |
| A_51_P304170  | NM_023386    | Rtp4          | 67775     | 2,251371517 | 8,989566038 | 6,40E-07    |
| A_66_P101942  | AK019325     | Gm9706        | 677168    | 2,227735294 | 11,61088679 | 4,80E-05    |
| A_55_P2114953 | NM_011909    | Usp18         | 24110     | 2,066921053 | 8,006471698 | 2,79E-06    |
| A_66_P128537  | NM_015783    | Isg15         | 100038882 | 2,066574303 | 10,74364151 | 0,000327965 |
| A_55_P2103698 | NM_015783    | Isg15         | 100038882 | 2,044094427 | 14,47764151 | 0,000120151 |
| A_55_P2019719 | NM_145227    | Oas2          | 246728    | 1,971091331 | 7,814       | 1,18E-07    |
| A_51_P359570  | NM_010501    | Ifit3         | 15959     | 1,908117647 | 7,743924528 | 0,000123272 |
| A_52_P700056  | NM_001081957 | Wfdc17        | 100034251 | 1,90571517  | 8,129886792 | 1,23E-05    |
| A_55_P2105858 | NM_030693    | Atf5          | 107503    | 1,890928793 | 10,7660566  | 0,000300721 |
| A_55_P2118441 | NM_010846    | Mx1           | 17857     | 1,854667183 | 6,999792453 | 2,01E-06    |
| A_55_P1998943 | NM_145211    | Oas1a         | 246730    | 1,763       | 8,815018868 | 0,000816634 |
| A_51_P256827  | NM_013650    | S100a8        | 20201     | 1,738705882 | 11,62860377 | 0,002912931 |
| A_55_P2410875 | AK034163     | C030037D09Rik | 193280    | 1,735534056 | 9,888849057 | 0,007276211 |
| A_55_P1972872 | NM_001005858 | I830012O16Rik | 667370    | 1,723270898 | 6,88945283  | 4,84E-06    |
| A_51_P514085  | NM_013606    | Mx2           | 17858     | 1,722486068 | 7,085377358 | 0,009938069 |
| A_51_P333274  | NM_013542    | Gzmb          | 14939     | 1,71479257  | 7,597207547 | 1,18E-07    |
| A_55_P2086433 | NM_145209    | Oasl1         | 231655    | 1,692513932 | 8,117867925 | 9,27E-06    |
| A_55_P1958250 | NM_030743    | Rnf114        | 81018     | 1,673428793 | 12,95558491 | 1,45E-10    |
| A_51_P472867  | NM_145226    | Oas3          | 246727    | 1,6715      | 7,618716981 | 2,01E-07    |
| A_51_P154842  | NM_145153    | Oas1f         | 243262    | 1,670224458 | 8,186377358 | 7,40E-05    |
| A_55_P1996973 | NM_029000    | Gvin1         | 74558     | 1,662902477 | 10,57781132 | 0,000120151 |
| A_51_P517695  | NM_008530    | Ly6f          | 17071     | 1,580402477 | 7,755735849 | 3,18E-05    |
| A_55_P1999213 | NM_146142    | Tdrd7         | 100121    | 1,532527864 | 8,623132075 | 7,44E-07    |
| A_51_P183812  | NM_011410    | Slfn4         | 20558     | 1,51226935  | 6,974075472 | 9,27E-07    |
| A_52_P90363   | NM_029803    | Ifi27l2a      | 76933     | 1,509125387 | 12,18956604 | 0,000160945 |
| A_55_P1958255 | NM_030743    | Rnf114        | 81018     | 1,50398452  | 8,880811321 | 3,96E-08    |
| A_55_P2037343 | NM_010391    | H2-Q10        | 15007     | 1,501520124 | 8,168339623 | 1,40E-05    |
| A_55_P2087118 | NM_020498    | Ly6i          | 57248     | 1,49604644  | 7,692377358 | 0,000142508 |
| A_55_P2169356 | AK156879     | Gm1966        | 434223    | 1,489422601 | 8,806679245 | 0,000157509 |
| A_66_P106388  | NM_029499    | Ms4a4c        | 64380     | 1,483441176 | 7,389358491 | 0,000402809 |
| A_55_P2091461 | NM_007609    | Casp4         | 12363     | 1,472643963 | 8,411811321 | 8,84E-05    |
| A_55_P1988975 | BC028433     | Ms4a4b        | 60361     | 1,455357585 | 8,643584906 | 0,046104374 |
| A_55_P1998471 | NM_009114    | S100a9        | 20202     | 1,452060372 | 13,85922642 | 0,000165647 |
| A_51_P128876  | NM_025378    | Ifitm3        | 66141     | 1,443509288 | 10,64939623 | 6,37E-05    |
| A_55_P2331804 | AK139027     | AU015791      | 104932    | 1,431750774 | 8,022886792 | 0,001389331 |
| A_55_P1998942 | NM_145211    | Oas1a         | 246730    | 1,426823529 | 7,342679245 | 0,000116126 |
| A_55_P1984168 | NM_007609    | Casp4         | 12363     | 1,417179567 | 8,009339623 | 3,84E-05    |
| A_55_P2013038 | NM_148942    | Serpinc6c     | 97848     | 1,410637771 | 9,096641509 | 0,009704785 |
| A_55_P2047768 | NM_148942    | Serpinc6c     | 97848     | 1,400100619 | 10,01071698 | 0,01393898  |
| A_55_P1979147 | NM_001159904 | Klrb1c        | 17059     | 1,37555418  | 7,656358491 | 0,000120151 |
| A_55_P2062246 | NM_001145164 | Tgtp2         | 100039796 | 1,373930341 | 10,80145283 | 2,32E-05    |
| A_55_P2066727 | NM_001164118 | Serpinc6a     | 20719     | 1,35919195  | 10,53743396 | 0,01149013  |
| A_51_P203955  | NM_010260    | Gbp2          | 14469     | 1,35129257  | 8,187396226 | 2,60E-05    |
| A_55_P1966833 | NM_001037713 | Xaf1          | 327959    | 1,339354489 | 7,767528302 | 1,40E-05    |
| A_55_P2136880 | NM_008654    | Ppp1r15a      | 17872     | 1,337434985 | 11,01607547 | 2,60E-05    |
| A_51_P346938  | NM_029796    | Lrg1          | 76905     | 1,312219814 | 8,642830189 | 0,0018094   |

|               |              |               |           |             |             |             |
|---------------|--------------|---------------|-----------|-------------|-------------|-------------|
| A_51_P163444  | NM_025821    | Carhsp1       | 52502     | 1,305902477 | 10,40783019 | 0,000128517 |
| A_51_P112355  | NM_018738    | Igtp          | 16145     | 1,304325077 | 10,758      | 7,40E-07    |
| A_55_P2019557 | NM_153101    | Mrgpra2b      | 235712    | 1,267348297 | 7,594773585 | 3,11E-06    |
| A_55_P2172001 | NM_001172588 | Mrgpra2a      | 668727    | 1,264623839 | 7,526679245 | 4,37E-06    |
| A_52_P638459  | NM_013653    | Ccl5          | 20304     | 1,262470588 | 11,81711321 | 0,000186871 |
| A_55_P1960231 | NM_019913    | Txn2          | 56551     | 1,25329257  | 12,02526415 | 0,059124029 |
| A_52_P518808  | BC027020     | Mmd           | 67468     | 1,236956656 | 8,448849057 | 1,22E-06    |
| A_51_P151182  | NM_011940    | Ifi202b       | 26388     | 1,229241486 | 7,114377358 | 0,000440342 |
| A_55_P2051455 | NM_178882    | D2hgdh        | 98314     | 1,227582043 | 10,62254717 | 0,018981481 |
| A_51_P213691  | NM_011324    | Scnn1a        | 20276     | 1,227557276 | 7,622773585 | 1,97E-05    |
| A_55_P1959748 | NM_012055    | Asns          | 27053     | 1,225659443 | 7,875622642 | 1,96E-07    |
| A_55_P2026639 | NM_001100614 | Gm11564       | 670496    | 1,221702786 | 8,411792453 | 0,002899772 |
| A_51_P501312  | NM_025294    | Natd1         | 24083     | 1,218628483 | 8,133396226 | 1,45E-10    |
| A_51_P254656  | NM_008230    | Hdc           | 15186     | 1,216275542 | 8,59990566  | 4,82E-05    |
| A_55_P2094060 | NM_010370    | Gzma          | 14938     | 1,213625387 | 11,75613208 | 4,89E-05    |
| A_55_P2100088 | NM_001013784 | E130309D14Rik | 432582    | 1,213544892 | 6,699867925 | 1,18E-07    |
| A_55_P2088401 | NM_010399    | H2-T9         | 15051     | 1,204386997 | 7,446584906 | 1,04E-05    |
| A_55_P2081164 | NM_001169153 | Cd300lf       | 246746    | 1,199204334 | 8,571962264 | 2,43E-06    |
| A_51_P149714  | NM_026835    | Ms4a6d        | 68774     | 1,197866873 | 6,775188679 | 1,72E-05    |
| A_55_P2032167 | NM_008327    | Ifi202b       | 26388     | 1,192859133 | 7,040716981 | 0,000294933 |
| A_52_P422494  | NM_145634    | Cd300lf       | 246746    | 1,167109907 | 8,378603774 | 1,47E-06    |
| A_51_P262171  | NM_008326    | Irgm1         | 15944     | 1,159239938 | 8,00654717  | 8,30E-06    |
| A_55_P2148478 | NM_029652    | Klhl25        | 207952    | 1,147356037 | 8,826433962 | 0,000455424 |
| A_51_P246653  | NM_020008    | Clec7a        | 56644     | 1,131208978 | 9,214792453 | 0,000560332 |
| A_55_P2019601 | NM_033616    | Csprs         | 114564    | 1,11003096  | 7,867641509 | 8,88E-06    |
| A_55_P2180096 | NM_001178039 | Gm10136       | 672214    | 1,109582043 | 13,18824528 | 3,27E-05    |
| A_51_P296608  | NM_007836    | Gadd45a       | 13197     | 1,108134675 | 9,687226415 | 3,47E-05    |
| A_51_P288138  | NM_008039    | Fpr2          | 14289     | 1,104408669 | 7,495037736 | 0,000105034 |
| A_55_P2146254 | NM_001112715 | Ifitm1        | 68713     | 1,104320433 | 9,35209434  | 0,001173854 |
| A_55_P1953169 | NM_011315    | Saa3          | 20210     | 1,09921517  | 6,464264151 | 0,064102639 |
| A_52_P450934  | NM_198414    | Paqr9         | 75552     | 1,079479876 | 11,11792453 | 0,058592576 |
| A_55_P2156288 | XM_001479076 | Gm3932        | 100042616 | 1,074475232 | 7,090924528 | 0,030086243 |
| A_51_P325856  | NM_026985    | Mcemp1        | 69189     | 1,067676471 | 7,806075472 | 0,000283603 |
| A_66_P139683  | NM_021394    | Zbp1          | 58203     | 1,06672291  | 7,042792453 | 3,29E-05    |
| A_51_P126198  | NM_010019    | Dapk2         | 13143     | 1,06669969  | 8,645754717 | 0,000372126 |
| A_55_P2066578 | BC010546     | Ifi204        | 15951     | 1,065859133 | 6,865188679 | 5,86E-05    |
| A_55_P2065567 | NM_026527    | Chac2         | 68044     | 1,063289474 | 9,198679245 | 0,007703597 |
| A_52_P375312  | NM_001005421 | Amica1        | 270152    | 1,062831269 | 9,233867925 | 0,000300721 |
| A_51_P383032  | NM_010819    | Clec4d        | 17474     | 1,060335913 | 9,418679245 | 0,000282464 |
| A_55_P1957459 | NM_013532    | Lilrb4        | 14728     | 1,051393189 | 8,797679245 | 0,000122325 |
| A_52_P190405  | NM_010509    | Ifnar2        | 15976     | 1,050089783 | 8,96209434  | 1,11E-07    |
| A_55_P1988844 | NM_016970    | Klrg1         | 50928     | 1,045434985 | 7,269396226 | 2,42E-06    |
| A_51_P490023  | NM_009450    | Tubb2a        | 22151     | 1,040599071 | 11,47160377 | 0,005085532 |
| A_52_P104824  | NM_019670    | Diap3         | 56419     | 1,036352941 | 11,36716981 | 0,081484999 |
| A_52_P535484  | NM_029000    | Gvin1         | 74558     | 1,035865325 | 10,92937736 | 0,000122325 |
| A_51_P129012  | NM_009735    | B2m           | 12010     | 1,034074303 | 13,509      | 0,00013013  |
| A_55_P2170509 | NM_026417    | Yipf4         | 67864     | 1,024323529 | 10,86388679 | 0,069651923 |
| A_51_P169693  | NM_198095    | Bst2          | 69550     | 1,022998452 | 7,803       | 0,000160945 |
| A_55_P2172396 | NM_178796    | A530064D06Rik | 328830    | 1,021400929 | 6,900603774 | 2,93E-06    |
| A_52_P127362  | NM_029478    | Vmp1          | 75909     | 1,019236842 | 9,164886792 | 0,000142544 |

|               |              |               |           |             |             |             |
|---------------|--------------|---------------|-----------|-------------|-------------|-------------|
| A_51_P463846  | NM_145545    | Gbp7          | 229900    | 1,01830031  | 7,359698113 | 7,40E-05    |
| A_55_P2005783 | NM_027835    | Ifih1         | 71586     | 1,016690402 | 6,991415094 | 8,48E-06    |
| A_51_P169516  | NM_001085501 | Ppp1r3d       | 228966    | 1,010328173 | 7,475075472 | 1,33E-05    |
| A_55_P2334424 | AK158188     | D630024D03Rik | 414116    | 1,005970588 | 7,639660377 | 0,000615321 |
| A_55_P2011991 | NM_022332    | St7           | 64213     | 1,000890093 | 9,275603774 | 0,000723139 |
| A_51_P272817  | NM_008928    | Map2k3        | 26397     | 0,999630031 | 9,595622642 | 2,60E-05    |
| A_52_P476560  | NM_145853    | Tpcn1         | 252972    | 0,995996904 | 8,342584906 | 9,41E-06    |
| A_51_P362066  | NM_007695    | Chil1         | 12654     | 0,995893189 | 7,186283019 | 0,000123736 |
| A_51_P112627  | NM_009180    | St6galnac2    | 20446     | 0,993634675 | 7,340679245 | 0,012619511 |
| A_51_P249118  | NM_008830    | Abcb4         | 18670     | 0,98378483  | 8,468471698 | 0,00047072  |
| A_55_P2025248 | NM_010751    | Mxd1          | 17119     | 0,980371517 | 10,74892453 | 3,21E-06    |
| A_55_P1962305 | NM_139198    | Plac8         | 231507    | 0,967394737 | 10,68530189 | 0,014082886 |
| A_51_P487690  | NM_133871    | Ifi44         | 99899     | 0,960360681 | 6,398603774 | 0,00047247  |
| A_55_P2070079 | NM_010708    | Lgals9        | 16859     | 0,960071207 | 7,78        | 0,001203076 |
| A_55_P2197638 | AK004186     | 1110046J04Rik | 68808     | 0,951128483 | 7,172       | 0,003441842 |
| A_51_P134030  | NM_145210    | Oas1e         | 231699    | 0,946839009 | 6,793962264 | 9,22E-08    |
| A_55_P1994927 | NM_144538    | Rab3il1       | 74760     | 0,945956656 | 9,199528302 | 0,011842179 |
| A_52_P559975  | NM_009909    | Cxcr2         | 12765     | 0,944020124 | 8,437981132 | 0,001740062 |
| A_52_P332788  | AK016231     | C130026I21Rik | 620078    | 0,942575851 | 7,435433962 | 0,000124861 |
| A_51_P241769  | NM_011270    | Rhd           | 19746     | 0,938701238 | 9,261603774 | 0,060820888 |
| A_55_P1979708 | NM_023305    | Ubap1         | 67123     | 0,935572755 | 9,04245283  | 0,001478037 |
| A_51_P470079  | NM_010555    | Il1r2         | 16178     | 0,932335913 | 6,911792453 | 0,000734254 |
| A_55_P2030568 | NM_053217    | 2010002M12Rik | 112419    | 0,924371517 | 7,111849057 | 4,53E-05    |
| A_66_P103398  | NM_001081079 | Ogfrl1        | 70155     | 0,918354489 | 8,235603774 | 0,01579915  |
| A_55_P2034864 | NM_023716    | Tubb2b        | 73710     | 0,914394737 | 7,714301887 | 0,003543777 |
| A_52_P670026  | NM_021384    | Rsad2         | 58185     | 0,913894737 | 14,90862264 | 0,000473384 |
| A_51_P155142  | NM_026560    | Cdca8         | 52276     | 0,910417957 | 6,99290566  | 3,87E-06    |
| A_51_P275454  | NM_009099    | Trim30a       | 20128     | 0,905860681 | 7,624566038 | 4,06E-05    |
| A_55_P2117656 | NM_181545    | Slfn8         | 276950    | 0,905162539 | 7,683698113 | 0,012749009 |
| A_55_P2052181 | NM_025534    | Ccdc82        | 66396     | 0,901139319 | 9,251226415 | 9,19E-06    |
| A_51_P221014  | NM_010581    | Cd47          | 16423     | 0,899843653 | 10,32732075 | 0,000529085 |
| A_55_P1998811 | XM_001476688 | Gm3430        | 100041612 | 0,899470588 | 8,507981132 | 0,038485254 |
| A_51_P262515  | NM_172603    | Phf11a        | 219131    | 0,899105263 | 7,633320755 | 0,000189056 |
| A_51_P159503  | AK173199     | Rnf213        | 672511    | 0,898026316 | 7,823433962 | 8,33E-05    |
| A_55_P2048607 | NM_017370    | Hp            | 15439     | 0,897743034 | 10,74677358 | 0,004621397 |
| A_51_P413866  | NM_008198    | Cfb           | 14962     | 0,896710526 | 6,579962264 | 0,00288003  |
| A_51_P464918  | NM_019453    | Mefv          | 54483     | 0,896157895 | 7,597264151 | 0,000318713 |
| A_55_P2015687 | NM_001164323 | Phf11d        | 219132    | 0,89494582  | 7,75209434  | 0,000956406 |
| A_55_P1994042 | NM_001139519 | Zbp1          | 58203     | 0,893498452 | 8,661075472 | 0,000198839 |
| A_51_P444447  | NM_007679    | Cebpδ         | 12609     | 0,889010836 | 9,316849057 | 0,004084006 |
| A_55_P1997997 | NM_024470    | Klra23        | 79410     | 0,885741486 | 6,958735849 | 5,70E-06    |
| A_52_P186937  | NM_020557    | Cmpk2         | 22169     | 0,883303406 | 6,755773585 | 2,63E-05    |
| A_55_P2004016 | NM_030209    | Crispld2      | 78892     | 0,88325387  | 6,771226415 | 0,000335715 |
| A_52_P431615  | XM_001000891 | Gm1966        | 434223    | 0,880859133 | 8,295867925 | 0,002153606 |
| A_52_P467046  | NM_026236    | Wdr48         | 67561     | 0,880705882 | 7,166018868 | 0,000161581 |
| A_51_P212782  | NM_008361    | Il1b          | 16176     | 0,874063467 | 8,685490566 | 0,005649284 |
| A_55_P2052016 | NM_030209    | Crispld2      | 78892     | 0,873312693 | 6,611603774 | 0,000186871 |
| A_55_P2016462 | NM_021274    | Cxcl10        | 15945     | 0,871801858 | 6,269415094 | 4,06E-05    |
| A_55_P2170349 | NM_053152    | Klra22        | 93969     | 0,871208978 | 8,571584906 | 0,002940716 |
| A_66_P112006  | NM_010395    | H2-T10        | 15024     | 0,866902477 | 7,75445283  | 0,000641121 |

|               |              |               |           |             |             |             |
|---------------|--------------|---------------|-----------|-------------|-------------|-------------|
| A_55_P2059154 | NM_001013371 | Dtx3l         | 209200    | 0,866662539 | 8,460396226 | 2,63E-05    |
| A_55_P2167451 | NM_033569    | Cnmn2         | 94219     | 0,863904025 | 8,289113208 | 0,004921733 |
| A_51_P198675  | NM_138951    | Ttc36         | 192653    | 0,861255418 | 7,883075472 | 0,017900123 |
| A_52_P1020860 | NM_001177351 | AW112010      | 107350    | 0,860995356 | 9,08445283  | 0,004910531 |
| A_55_P2051596 | XM_001479558 | Gm4499        | 100043524 | 0,855565015 | 7,82709434  | 0,038694704 |
| A_55_P2048279 | NM_205820    | Tlr13         | 279572    | 0,851077399 | 8,563867925 | 0,000392564 |
| A_51_P373461  | NM_145956    | Brcc3         | 210766    | 0,848693498 | 8,124660377 | 1,96E-06    |
| A_55_P1975560 | NM_008329    | Ifi204        | 15951     | 0,84619969  | 8,824207547 | 0,000403702 |
| A_51_P299062  | NM_032540    | Kel           | 23925     | 0,845733746 | 9,867716981 | 0,009112054 |
| A_52_P493620  | NM_026218    | Fgfr1op2      | 67529     | 0,844399381 | 9,728415094 | 0,009938069 |
| A_55_P2129354 | NM_153510    | Pilra         | 231805    | 0,842006192 | 8,045792453 | 0,000122325 |
| A_55_P2004527 | NM_010650    | Klra8         | 16639     | 0,841247678 | 7,339226415 | 0,000300721 |
| A_55_P2019690 | NM_001081349 | Slc43a1       | 72401     | 0,83744582  | 7,909981132 | 0,005266879 |
| A_52_P266132  | NM_008013    | Fgl2          | 14190     | 0,836863777 | 7,428301887 | 1,39E-05    |
| A_51_P338878  | NM_027571    | P2ry12        | 70839     | 0,834710526 | 9,833735849 | 0,003554136 |
| A_51_P120066  | NR_033222    | 9330151L19Rik | 414085    | 0,829987616 | 8,107660377 | 0,010302611 |
| A_55_P2168185 | XM_357571    | Gm5299        | 384325    | 0,82953096  | 15,20958491 | 0,000561949 |
| A_55_P2063376 | NM_013458    | Add2          | 11519     | 0,829396285 | 8,436566038 | 0,009211127 |
| A_52_P484838  | NM_011266    | Rfxank        | 19727     | 0,829063467 | 8,956358491 | 0,000160945 |
| A_52_P110052  | NM_010045    | Ackr1         | 13349     | 0,827541796 | 8,794018868 | 0,001395685 |
| A_55_P2069842 | NM_001081232 | D5ErtD579e    | 320661    | 0,827450464 | 8,262603774 | 0,000241849 |
| A_51_P108108  | NM_153074    | Lrrc25        | 211228    | 0,826473684 | 7,501283019 | 2,49E-05    |
| A_55_P2320283 | AK033703     | Hmga2-ps1     | 15365     | 0,823472136 | 10,3194717  | 0,055942086 |
| A_52_P199633  | NM_199146    | Trim30d       | 209387    | 0,822611455 | 6,957339623 | 8,30E-06    |
| A_52_P511821  | NM_027057    | Wdfy1         | 69368     | 0,820235294 | 6,798811321 | 1,56E-05    |
| A_51_P459070  | NM_024251    | Aplf          | 72103     | 0,812326625 | 7,005358491 | 6,27E-07    |
| A_55_P2072115 | NR_030671    | AW011738      | 100382    | 0,809890093 | 6,900132075 | 0,003318544 |
| A_55_P1985693 | NM_001033301 | Fhdc1         | 229474    | 0,808467492 | 7,145886792 | 0,000213769 |
| A_55_P1998957 | NM_033541    | Oas1c         | 114643    | 0,806013932 | 7,204566038 | 4,34E-05    |
| A_55_P2141699 | NM_001033135 | Rnf149        | 67702     | 0,80571517  | 7,98954717  | 1,37E-05    |
| A_51_P258372  | NM_030691    | Igsf6         | 80719     | 0,803294118 | 8,613679245 | 0,000509104 |
| A_51_P147274  | NM_153197    | Clec4a3       | 73149     | 0,798557276 | 7,048981132 | 0,000473384 |
| A_51_P501364  | NM_019507    | Tbx21         | 57765     | 0,797226006 | 7,457150943 | 5,99E-05    |
| A_55_P2040838 | NM_001166672 | Gm14548       | 100038909 | 0,797060372 | 8,208415094 | 0,000937343 |
| A_55_P1978424 | NM_007536    | Bcl2a1d       | 12047     | 0,792606811 | 8,092377358 | 0,013472454 |
| A_51_P499838  | NM_009763    | Bst1          | 12182     | 0,782294118 | 6,828150943 | 0,000575583 |
| A_55_P2057936 | NM_001135115 | Gm12250       | 631323    | 0,77794582  | 7,549150943 | 0,001581545 |
| A_51_P248666  | NM_021893    | Cd274         | 60533     | 0,774843653 | 7,271509434 | 1,52E-05    |
| A_51_P359636  | NM_011150    | Lgals3bp      | 19039     | 0,773029412 | 9,45009434  | 0,037022708 |
| A_55_P2042184 | XM_001476516 | Gm3181        | 100041175 | 0,772626935 | 6,973773585 | 0,04517934  |
| A_52_P139650  | NM_025581    | Ska1          | 66468     | 0,771004644 | 6,483603774 | 0,000239357 |
| A_52_P577384  | NM_010531    | Il18bp        | 16068     | 0,769543344 | 6,356962264 | 0,000111931 |
| A_55_P2011084 | AK172348     | Trim30b       | 244183    | 0,766179567 | 6,950962264 | 0,00061332  |
| A_55_P1991931 | NM_025533    | Nosip         | 66394     | 0,765778638 | 7,893377358 | 0,006330986 |
| A_55_P1992487 | XM_888318    | Gm6453        | 623818    | 0,765306502 | 9,102943396 | 0,009112054 |
| A_51_P438083  | NM_144512    | Slc6a13       | 14412     | 0,765089783 | 6,662924528 | 9,23E-10    |
| A_51_P400543  | NM_019467    | Aif1          | 11629     | 0,765013932 | 6,839867925 | 0,000120151 |
| A_51_P469568  | NM_020504    | Cldn13        | 57255     | 0,764229102 | 6,616792453 | 2,49E-05    |
| A_52_P183524  | NM_023440    | Tmem86b       | 68255     | 0,763653251 | 6,614056604 | 0,002698558 |
| A_66_P109986  | NM_001111058 | Cd33          | 12489     | 0,762817337 | 6,600698113 | 1,23E-05    |

|               |              |               |           |             |             |             |
|---------------|--------------|---------------|-----------|-------------|-------------|-------------|
| A_55_P2131238 | NM_153392    | Ttc39a        | 230603    | 0,762390093 | 7,740603774 | 0,01733287  |
| A_51_P281333  | NM_018784    | St3gal6       | 54613     | 0,761383901 | 7,423301887 | 9,27E-07    |
| A_51_P370678  | NM_008114    | Gfi1b         | 14582     | 0,760495356 | 7,605924528 | 0,001235134 |
| A_52_P223809  | NM_030150    | Dhx58         | 80861     | 0,757726006 | 6,586490566 | 2,87E-05    |
| A_66_P119518  | NM_017379    | Tuba8         | 53857     | 0,756487616 | 7,707811321 | 0,003431106 |
| A_52_P42245   | NM_010737    | Klrb1a        | 17057     | 0,753557276 | 6,962849057 | 0,005528871 |
| A_55_P2137611 | NM_019440    | Irgm2         | 54396     | 0,751218266 | 7,628981132 | 0,000877034 |
| A_66_P120567  | NM_010730    | Anxa1         | 16952     | 0,749843653 | 8,07054717  | 0,001786263 |
| A_55_P2004541 | NM_001110323 | Klra7         | 16638     | 0,745088235 | 7,294018868 | 0,001471779 |
| A_55_P2324976 | NR_029464    | 5033406O09Rik | 77675     | 0,744766254 | 6,721962264 | 0,010863676 |
| A_66_P121787  | NM_010156    | Samd9l        | 209086    | 0,740919505 | 8,645377358 | 0,001316951 |
| A_55_P2150717 | NM_010136    | Eomes         | 13813     | 0,73848452  | 8,740886792 | 0,011871383 |
| A_55_P2013043 | NM_011454    | Serpib6b      | 20708     | 0,738190402 | 7,108075472 | 1,22E-06    |
| A_55_P2090184 | NM_026218    | Fgfr1op2      | 67529     | 0,737990712 | 10,72515094 | 0,010219772 |
| A_55_P1962404 | NM_201410    | Ugt1a6b       | 394435    | 0,736490712 | 7,731113208 | 0,00135556  |
| A_55_P2113498 | NM_010654    | Klrd1         | 16643     | 0,736210526 | 7,864924528 | 0,001207429 |
| A_52_P615247  | AK087744     | A530040E14Rik | 621875    | 0,733428793 | 7,504603774 | 0,000791945 |
| A_52_P86693   | NM_026790    | ifi27         | 52668     | 0,728758514 | 11,24154717 | 0,035533373 |
| A_55_P2059606 | NM_019963    | Stat2         | 20847     | 0,726654799 | 7,548528302 | 0,000321788 |
| A_55_P1972634 | NM_010839    | Mtcp1         | 17763     | 0,726419505 | 8,312679245 | 0,001573331 |
| A_51_P225793  | NM_175181    | Prr5l         | 72446     | 0,726060372 | 8,611962264 | 0,002004919 |
| A_55_P2076543 | XM_001476757 | Gm10144       | 100041121 | 0,725326625 | 11,15016981 | 0,025773647 |
| A_55_P2144364 | XM_001479624 | Gm4320        | 100043258 | 0,72506192  | 7,002339623 | 0,036307298 |
| A_55_P2151601 | NM_010156    | Samd9l        | 209086    | 0,723600619 | 9,210698113 | 0,00388012  |
| A_55_P2149363 | NM_172286    | 6430548M08Rik | 234797    | 0,721970588 | 8,054849057 | 0,000915152 |
| A_51_P465281  | NM_008495    | Lgals1        | 16852     | 0,721676471 | 10,19903774 | 0,009526163 |
| A_55_P1971054 | NM_198414    | Paqr9         | 75552     | 0,718216718 | 7,573415094 | 0,035533373 |
| A_51_P352968  | NM_008538    | Marcks        | 17118     | 0,718001548 | 8,519132075 | 0,003345639 |
| A_55_P1978316 | NM_001081127 | Adamts14      | 237360    | 0,716543344 | 7,816962264 | 0,005525044 |
| A_55_P2078494 | NM_001080812 | Cib3          | 234421    | 0,716134675 | 7,382698113 | 0,055137383 |
| A_51_P490795  | NM_010751    | Mxd1          | 17119     | 0,715752322 | 9,006943396 | 7,96E-05    |
| A_52_P313285  | AF108397     | Slc8a1        | 20541     | 0,713534056 | 7,591471698 | 0,037022479 |
| A_55_P2094626 | NM_175211    | Ralgps1       | 241308    | 0,713049536 | 8,689150943 | 0,000239357 |
| A_51_P181517  | NM_144559    | Fcgr4         | 246256    | 0,713034056 | 7,671792453 | 0,001642855 |
| A_55_P1962304 | NM_139198    | Plac8         | 231507    | 0,710182663 | 8,091358491 | 0,000198839 |
| A_55_P1959985 | NM_020559    | Alas1         | 11655     | 0,708851393 | 11,2245283  | 0,078791852 |
| A_51_P425632  | NM_025649    | Mad2l1bp      | 66591     | 0,705834365 | 9,192358491 | 0,000290242 |
| A_55_P2066017 | XM_001478769 | Gm4015        | 100042759 | 0,705630031 | 6,568226415 | 0,002410946 |
| A_55_P1978681 | NM_146010    | Tspan8        | 216350    | 0,703662539 | 6,949962264 | 0,000724706 |
| A_55_P2095754 | NM_207534    | Mrgpra5       | 404235    | 0,703325077 | 6,29154717  | 0,00110303  |
| A_52_P482124  | NM_026455    | Fam32a        | 67922     | 0,701006192 | 9,395245283 | 0,000142544 |
| A_51_P197378  | NM_026217    | Atg12         | 67526     | 0,700885449 | 11,32684906 | 0,003188176 |
| A_55_P2017764 | NM_028120    | Cep89         | 72140     | 0,69894582  | 7,102830189 | 7,40E-05    |
| A_51_P224983  | NM_012000    | Cln8          | 26889     | 0,698794118 | 7,448716981 | 0,04299498  |
| A_55_P2094686 | AK078025     | 2700089E24Rik | 381820    | 0,698622291 | 8,123037736 | 0,025031068 |
| A_55_P2076631 | NM_001048207 | Gypc          | 71683     | 0,698143963 | 9,307660377 | 0,000300721 |
| A_55_P2077783 | NR_003964    | Tubb2a-ps2    | 627110    | 0,696506192 | 7,471132075 | 0,007150345 |
| A_55_P2045886 | NM_019635    | Stk3          | 56274     | 0,695414861 | 7,898358491 | 0,058756707 |
| A_51_P485594  | NM_025729    | Tab3          | 66724     | 0,69230031  | 8,705830189 | 0,013455178 |
| A_55_P2092826 | NM_010730    | Anxa1         | 16952     | 0,692089783 | 9,717754717 | 0,012619511 |

|               |              |               |           |             |             |             |
|---------------|--------------|---------------|-----------|-------------|-------------|-------------|
| A_51_P323180  | NM_172777    | Gbp9          | 236573    | 0,69177709  | 7,515113208 | 0,000417836 |
| A_55_P1998578 | NM_030694    | Ifitm2        | 80876     | 0,691320433 | 8,581037736 | 0,004796554 |
| A_55_P2133195 | NM_001033767 | Gm4951        | 240327    | 0,690608359 | 6,26554717  | 0,003068395 |
| A_52_P541161  | NM_022881    | Rgs18         | 64214     | 0,690185759 | 11,35866038 | 0,086310014 |
| A_66_P122086  | NM_001039720 | 9030619P08Rik | 105892    | 0,688749226 | 7,071792453 | 0,000403702 |
| A_51_P488739  | NM_030701    | Hcar2         | 80885     | 0,687834365 | 6,52290566  | 7,44E-07    |
| A_55_P2179413 | NM_011150    | Lgals3bp      | 19039     | 0,68549226  | 9,159566038 | 0,003059803 |
| A_55_P2063166 | NM_177767    | Ogfod1        | 270086    | 0,681294118 | 11,1299434  | 0,003271941 |
| A_51_P209319  | NM_016752    | Slc35b1       | 110172    | 0,680651703 | 8,905566038 | 0,000236389 |
| A_55_P2077958 | NM_008463    | Klra5         | 16636     | 0,678051084 | 6,350339623 | 8,66E-05    |
| A_51_P326191  | NM_009251    | Serpina3g     | 20715     | 0,676524768 | 7,540792453 | 0,065975736 |
| A_51_P500082  | NM_001110517 | Gm14446       | 667373    | 0,674287926 | 6,863490566 | 0,030129721 |
| A_55_P2004526 | NM_010650    | Klra8         | 16639     | 0,673631579 | 7,179490566 | 0,001262137 |
| A_55_P2009116 | NR_033558    | F830002L21Rik | 414125    | 0,671359133 | 8,156264151 | 0,020450715 |
| A_55_P2097279 | NM_011095    | Pirb          | 18733     | 0,669510836 | 9,742660377 | 0,038609517 |
| A_51_P499195  | NM_024253    | Nkg7          | 72310     | 0,669419505 | 9,272245283 | 0,028886904 |
| A_52_P425890  | NM_011407    | Slfn1         | 20555     | 0,668622291 | 7,076283019 | 2,91E-05    |
| A_55_P2136786 | NM_133906    | Zkscan1       | 74570     | 0,667193498 | 14,69909434 | 0,013472454 |
| A_55_P2102065 | NM_001122660 | Gm10639       | 100042314 | 0,665702786 | 6,425471698 | 0,020806546 |
| A_55_P2038262 | NM_001164327 | Phf11b        | 236451    | 0,66545356  | 8,479       | 0,003938959 |
| A_55_P2042813 | NM_001039647 | Gbp11         | 634650    | 0,664758514 | 7,029603774 | 4,19E-05    |
| A_51_P377452  | NM_008677    | Ncf4          | 17972     | 0,663467492 | 11,62390566 | 2,85E-05    |
| A_51_P231320  | NM_008611    | Mmp8          | 17394     | 0,662424149 | 6,969943396 | 0,035613561 |
| A_51_P238722  | NM_010740    | Cd93          | 17064     | 0,659747678 | 8,092660377 | 0,000357686 |
| A_55_P2043837 | NM_028791    | Cmtr1         | 74157     | 0,659441176 | 10,09596226 | 1,97E-05    |
| A_55_P1981479 | NM_008326    | Irgm1         | 15944     | 0,657244582 | 6,639792453 | 3,84E-05    |
| A_66_P133928  | NM_026126    | Fundc2        | 67391     | 0,656267802 | 12,9164717  | 0,001135028 |
| A_55_P1958867 | NM_001112668 | Gm9790        | 100042265 | 0,655589783 | 8,927169811 | 0,019805468 |
| A_55_P2151143 | NM_001166630 | Dynlt1c       | 100040563 | 0,654896285 | 10,18750943 | 0,01502002  |
| A_51_P501248  | NM_025367    | Sphk1         | 20698     | 0,654102167 | 7,081018868 | 0,01609795  |
| A_55_P2032718 | NM_010651    | Klra9         | 16640     | 0,65221517  | 7,235018868 | 1,22E-06    |
| A_51_P312485  | NM_013521    | Fpr1          | 14293     | 0,651119195 | 8,169037736 | 0,000515478 |
| A_51_P499061  | NM_173755    | Ube2o         | 217342    | 0,649835913 | 15,05401887 | 0,009680214 |
| A_55_P2035757 | NR_026561    | Gm8884        | 667933    | 0,648243034 | 7,227830189 | 0,000141568 |
| A_55_P2142863 | NM_030253    | Parp9         | 80285     | 0,646009288 | 7,394       | 1,78E-05    |
| A_52_P232580  | NM_145508    | Dyrk3         | 226419    | 0,643695046 | 6,82890566  | 0,000349548 |
| A_55_P2016675 | NM_031373    | Ogfr          | 72075     | 0,643433437 | 8,16454717  | 0,000685274 |
| A_55_P2075200 | NM_023141    | Tor3a         | 30935     | 0,641786378 | 6,853603774 | 0,000597687 |
| A_55_P1976112 | NM_178692    | C130074G19Rik | 226777    | 0,640914861 | 11,52532075 | 0,017964873 |
| A_51_P123625  | NM_008392    | Irg1          | 16365     | 0,640628483 | 6,174188679 | 2,53E-05    |
| A_51_P357744  | NM_010592    | Jund          | 16478     | 0,640366873 | 13,23983019 | 0,003797084 |
| A_55_P1956827 | NM_031373    | Ogfr          | 72075     | 0,638831269 | 10,37986792 | 0,002479771 |
| A_55_P2024595 | NM_001033436 | Atxn7l1       | 380753    | 0,638670279 | 9,763339623 | 0,032383086 |
| A_55_P2163857 | NM_001146007 | Trim12c       | 319236    | 0,638041796 | 7,150584906 | 0,000160945 |
| A_51_P519251  | NM_019738    | Nupr1         | 56312     | 0,636095975 | 7,190622642 | 0,012310539 |
| A_51_P192860  | NM_008248    | Hint1         | 15254     | 0,635775542 | 11,87530189 | 0,007278383 |
| A_55_P1990919 | NM_013759    | Msrp1         | 27361     | 0,6355      | 12,35432075 | 0,009443613 |
| A_52_P652316  | NM_153058    | Mapre2        | 212307    | 0,633142415 | 8,551622642 | 0,048283213 |
| A_51_P281089  | NM_011313    | S100a6        | 20200     | 0,63270743  | 11,17184906 | 0,029904404 |
| A_55_P1981959 | NM_001163470 | Traf1d1       | 231712    | 0,630899381 | 11,20937736 | 3,77E-05    |

|               |              |           |           |             |             |             |
|---------------|--------------|-----------|-----------|-------------|-------------|-------------|
| A_55_P2085716 | NM_026217    | Atg12     | 67526     | 0,630342105 | 9,537471698 | 0,003820288 |
| A_55_P2008740 | NM_010186    | Fcgr1     | 14129     | 0,628221362 | 6,293358491 | 0,008251643 |
| A_55_P1959425 | NM_030696    | Slc16a3   | 80879     | 0,627280186 | 8,013962264 | 0,009443613 |
| A_55_P1983044 | NM_001081687 | Gm5150    | 381484    | 0,627091331 | 7,229188679 | 0,010771677 |
| A_65_P19395   | NM_010380    | H2-D1     | 14964     | 0,62577709  | 11,99045283 | 0,018195949 |
| A_55_P2083894 | XM_001478221 | Gm3697    | 100042151 | 0,625198142 | 6,723245283 | 0,068201853 |
| A_55_P2114938 | NM_001159417 | Irf9      | 16391     | 0,624495356 | 8,710169811 | 0,002255956 |
| A_51_P515965  | NM_008685    | Nfe2      | 18022     | 0,624325077 | 10,37422642 | 0,031672779 |
| A_55_P1965448 | XM_907154    | Gm14989   | 632883    | 0,620315789 | 12,58837736 | 0,054053854 |
| A_51_P500424  | NM_133763    | Dnttip1   | 76233     | 0,620103715 | 9,288566038 | 5,79E-07    |
| A_66_P119034  | NM_013737    | Pla2g7    | 27226     | 0,616665635 | 9,031245283 | 0,003874741 |
| A_55_P2016376 | NM_030174    | Mctp1     | 78771     | 0,616113003 | 8,18154717  | 0,093520064 |
| A_55_P1962918 | NM_001033450 | Mnda      | 381308    | 0,616044892 | 6,365169811 | 0,003880831 |
| A_51_P212754  | NM_009369    | Tgfb1     | 21810     | 0,614919505 | 9,297207547 | 0,036812699 |
| A_51_P294555  | NM_001033632 | Ifitm6    | 213002    | 0,612874613 | 8,489150943 | 0,008112602 |
| A_52_P416327  | NM_178687    | Cd226     | 225825    | 0,612735294 | 9,806924528 | 0,06865149  |
| A_52_P192426  | NM_011609    | Tnfrsf1a  | 21937     | 0,611708978 | 8,335056604 | 0,002518654 |
| A_55_P2001518 | NM_023898    | Pde6h     | 78600     | 0,610044892 | 6,673018868 | 0,000316586 |
| A_55_P1985337 | NM_031395    | Sytl3     | 83672     | 0,609176471 | 7,587207547 | 0,034173131 |
| A_55_P2071176 | NM_153511    | Il1f9     | 215257    | 0,608911765 | 6,312377358 | 1,22E-07    |
| A_55_P2117681 | NM_026406    | Rnf115    | 67845     | 0,606763158 | 9,031018868 | 0,003505279 |
| A_55_P2030284 | NM_021406    | Trem1     | 58217     | 0,604921053 | 7,026358491 | 0,000761365 |
| A_52_P42069   | NM_021381    | Prokr1    | 58182     | 0,604086687 | 7,270735849 | 0,008028577 |
| A_51_P263246  | NM_008748    | Dusp8     | 18218     | 0,60345356  | 6,424773585 | 9,57E-06    |
| A_51_P241457  | NM_013532    | Lilrb4    | 14728     | 0,60255418  | 6,693245283 | 0,000402809 |
| A_55_P2001871 | NM_009479    | Uros      | 22276     | 0,602190402 | 7,720320755 | 0,000160826 |
| A_51_P161021  | NM_008332    | Ifit2     | 15958     | 0,602105263 | 6,885849057 | 0,004750559 |
| A_52_P64514   | NM_025992    | Herc6     | 67138     | 0,602034056 | 6,47        | 0,000183144 |
| A_55_P2052924 | NM_009156    | Sepw1     | 20364     | 0,601871517 | 10,97673585 | 0,02595351  |
| A_52_P432685  | NM_146012    | Ctdsp2    | 52468     | 0,601119195 | 8,554113208 | 0,028391682 |
| A_55_P2030209 | NM_025854    | Cir1      | 66935     | 0,600718266 | 9,100528302 | 0,015254664 |
| A_55_P2094966 | NM_178216    | Hist2h3c1 | 15077     | 0,596366873 | 7,413056604 | 0,001931048 |
| A_55_P2165869 | NM_009883    | Cebpb     | 12608     | 0,594772446 | 8,930132075 | 0,038596389 |
| A_55_P2094831 | NM_021471    | Slco1c1   | 58807     | 0,59475387  | 7,513301887 | 0,031159464 |
| A_52_P117408  | NM_009375    | Tg        | 21819     | 0,594498452 | 7,397886792 | 0,000172585 |
| A_52_P550173  | NM_013730    | Slamf1    | 27218     | 0,594065015 | 8,063849057 | 0,015744574 |
| A_51_P401907  | NM_001082547 | Gm5483    | 433016    | 0,593656347 | 6,894584906 | 0,078791852 |
| A_52_P91235   | NM_017367    | Ccni      | 12453     | 0,593363777 | 11,75250943 | 0,023586148 |
| A_55_P2060303 | NM_008624    | Mras      | 17532     | 0,592178019 | 7,368849057 | 0,027499331 |
| A_55_P2006277 | NM_010956    | Ogdh      | 18293     | 0,591611455 | 8,778528302 | 0,000269086 |
| A_52_P426768  | NM_019563    | Cited4    | 56222     | 0,590913313 | 7,076660377 | 0,000379954 |
| A_55_P2103115 | NM_172843    | Tor1aip2  | 240832    | 0,589170279 | 7,46609434  | 9,57E-06    |
| A_55_P2137121 | NM_001013817 | Sp140     | 434484    | 0,588665635 | 7,090207547 | 0,000785306 |
| A_51_P430423  | NM_007398    | Ada       | 11486     | 0,588196594 | 6,866245283 | 0,000119923 |
| A_55_P2158102 | NM_009921    | Camp      | 12796     | 0,587119195 | 7,73709434  | 0,022506001 |
| A_55_P2048022 | NR_003631    | Gm6578    | 625347    | 0,586136223 | 8,552830189 | 0,009112054 |
| A_51_P474459  | NM_007707    | Socs3     | 12702     | 0,586106811 | 8,651849057 | 0,011386721 |
| A_51_P208240  | NM_019418    | Tnfsf14   | 50930     | 0,58100774  | 7,074962264 | 0,000324464 |
| A_55_P2106150 | NM_021790    | Cenpk     | 60411     | 0,58076161  | 7,954962264 | 0,019268735 |
| A_55_P2108763 | NM_013673    | Sp100     | 20684     | 0,578729102 | 7,954792453 | 0,000380922 |

|               |              |               |           |             |             |             |
|---------------|--------------|---------------|-----------|-------------|-------------|-------------|
| A_55_P2110713 | NM_007585    | Anxa2         | 12306     | 0,578719814 | 10,90637736 | 0,014945442 |
| A_55_P2067505 | NM_030696    | Slc16a3       | 80879     | 0,578131579 | 7,973754717 | 0,017829376 |
| A_52_P309337  | NM_019648    | Metap2        | 56307     | 0,577167183 | 7,980320755 | 0,04755479  |
| A_55_P2020128 | NM_011303    | Dhrs3         | 20148     | 0,576623839 | 9,733037736 | 0,060676996 |
| A_55_P2182483 | NM_010581    | Cd47          | 16423     | 0,576065015 | 11,77939623 | 3,34E-05    |
| A_51_P454993  | NM_178874    | Tmcc2         | 68875     | 0,574643963 | 8,622886792 | 0,023578057 |
| A_51_P464029  | NM_021890    | Fads3         | 60527     | 0,573978328 | 6,396471698 | 1,27E-06    |
| A_55_P2025765 | NM_007403    | Adam8         | 11501     | 0,573941176 | 8,421811321 | 0,017696698 |
| A_55_P2035286 | NM_010931    | Uhrf1         | 18140     | 0,573721362 | 7,430320755 | 0,003067638 |
| A_52_P559498  | NM_007713    | Clk3          | 102414    | 0,573464396 | 7,394169811 | 2,01E-07    |
| A_55_P1995092 | NM_010391    | H2-Q10        | 15007     | 0,57303096  | 8,532132075 | 0,001831692 |
| A_55_P1978895 | NM_177578    | Skint3        | 195564    | 0,570789474 | 6,478622642 | 0,000755013 |
| A_51_P109050  | NM_023824    | Paqr4         | 76498     | 0,570701238 | 7,118679245 | 0,08660221  |
| A_55_P1998011 | NM_024470    | Klra23        | 79410     | 0,569886997 | 6,918622642 | 0,009774091 |
| A_51_P452629  | NM_011905    | Tlr2          | 24088     | 0,569719814 | 6,819150943 | 0,001368728 |
| A_55_P2152605 | NM_170756    | Spata2        | 263876    | 0,569035604 | 7,73490566  | 0,001155107 |
| A_55_P1985623 | NM_029600    | Abcc3         | 76408     | 0,568798762 | 6,907320755 | 0,007875638 |
| A_55_P2069969 | NM_001122660 | Gm10639       | 100042314 | 0,568105263 | 6,248660377 | 0,018025084 |
| A_55_P2016034 | NM_001033207 | Nlrc5         | 434341    | 0,564914861 | 8,188075472 | 0,004750559 |
| A_51_P452779  | NM_133198    | Pygl          | 110095    | 0,561811146 | 9,338698113 | 0,027928446 |
| A_55_P1972322 | NM_009770    | Btg3          | 12228     | 0,56119969  | 11,05603774 | 0,087626595 |
| A_55_P2002122 | NM_173402    | Rgs12         | 71729     | 0,559568111 | 7,07545283  | 4,35E-05    |
| A_51_P141818  | NM_029271    | Mrpl32        | 75398     | 0,558365325 | 8,631698113 | 0,015048568 |
| A_55_P2151138 | NM_001166630 | Dynl1c        | 100040563 | 0,557229102 | 9,985584906 | 0,015037736 |
| A_55_P2039699 | NM_009921    | Camp          | 12796     | 0,557055728 | 8,365169811 | 0,020671125 |
| A_51_P498631  | NM_018769    | Dfna5         | 54722     | 0,55694582  | 6,758924528 | 0,000545467 |
| A_51_P237754  | NM_010398    | H2-T23        | 15040     | 0,554383901 | 11,96209434 | 0,011876855 |
| A_52_P475870  | NM_001164686 | Tmem29        | 382245    | 0,55424613  | 8,158603774 | 0,042872085 |
| A_51_P219789  | NM_010392    | H2-Q2         | 15013     | 0,553430341 | 11,83181132 | 0,005043013 |
| A_51_P500090  | NM_014194    | Klra7         | 16638     | 0,552823529 | 6,340358491 | 0,001351271 |
| A_55_P1999561 | NM_001002842 | Pram1         | 378460    | 0,552764706 | 7,185396226 | 0,003785163 |
| A_55_P2033041 | NM_001173460 | Sirpb1b       | 668101    | 0,552249226 | 8,989358491 | 0,067465614 |
| A_55_P2107696 | NM_205821    | Mrgpra6       | 381886    | 0,552181115 | 6,274981132 | 0,000201133 |
| A_55_P2009988 | NM_175093    | Trib3         | 228775    | 0,548472136 | 6,677886792 | 0,019974241 |
| A_52_P549827  | NM_019946    | Mgst1         | 56615     | 0,547111455 | 6,955075472 | 0,050620727 |
| A_55_P2073099 | NM_011637    | Trex1         | 22040     | 0,54630031  | 11,17349057 | 0,000321971 |
| A_51_P214747  | NM_172893    | Parp12        | 243771    | 0,545820433 | 6,273377358 | 0,000377684 |
| A_55_P2106106 | NM_176912    | C5ar2         | 319430    | 0,545783282 | 6,763716981 | 0,0028043   |
| A_51_P368009  | NM_177733    | E2f2          | 242705    | 0,545569659 | 14,16816981 | 0,046331595 |
| A_52_P117393  | NM_011604    | Tlr6          | 21899     | 0,54344582  | 7,020584906 | 0,000360389 |
| A_55_P1975903 | NM_001003961 | Dnmt3b        | 13436     | 0,543066563 | 10,01730189 | 0,090349984 |
| A_51_P390538  | NM_010821    | Mpeg1         | 17476     | 0,54172291  | 9,959584906 | 0,076943915 |
| A_55_P2064652 | NM_001146007 | Trim12c       | 319236    | 0,540744582 | 6,407528302 | 0,00022165  |
| A_51_P110301  | NM_009778    | C3            | 12266     | 0,538018576 | 8,130698113 | 0,028778703 |
| A_55_P2110875 | NR_033198    | 2700046G09Rik | 67188     | 0,537439628 | 6,725490566 | 0,000152173 |
| A_55_P1978511 | NM_010394    | H2-Q7         | 15018     | 0,537417957 | 11,41018868 | 0,072842378 |
| A_51_P401987  | NM_019432    | Tmem37        | 170706    | 0,536896285 | 7,101207547 | 0,015048568 |
| A_55_P2016114 | NM_010177    | Fasl          | 14103     | 0,535640867 | 6,486433962 | 4,53E-05    |
| A_55_P1973941 | NM_011404    | Slc7a5        | 20539     | 0,535578947 | 8,431       | 0,065532103 |
| A_55_P2059904 | NM_001081163 | Chsy1         | 269941    | 0,533374613 | 7,639150943 | 0,00026504  |



|               |              |               |           |              |             |             |
|---------------|--------------|---------------|-----------|--------------|-------------|-------------|
| A_51_P422124  | NM_053090    | Fam126a       | 84652     | 0,533314241  | 8,59045283  | 0,009680214 |
| A_55_P2089080 | NM_024272    | Ssbp2         | 66970     | 0,533190402  | 9,056584906 | 0,012619511 |
| A_51_P407690  | NM_175195    | Sppl2b        | 73218     | 0,53226935   | 9,466754717 | 0,007301627 |
| A_52_P380369  | BC030186     | Phf11d        | 219132    | 0,530074303  | 6,797320755 | 0,003685095 |
| A_55_P2043466 | NM_173363    | Eif5          | 217869    | 0,529803406  | 11,72854717 | 0,011218088 |
| A_55_P2090617 | NM_153510    | Pilra         | 231805    | 0,529091331  | 6,901056604 | 0,002070824 |
| A_52_P164136  | NM_001042591 | Arrdc3        | 105171    | 0,528642415  | 6,694660377 | 0,001201302 |
| A_52_P547662  | NM_008772    | P2ry1         | 18441     | 0,526710526  | 7,240320755 | 0,0306468   |
| A_55_P2004536 | NM_010649    | Klra4         | 16635     | 0,526196594  | 7,425018868 | 0,076011815 |
| A_52_P486322  | NM_019757    | Fzr1          | 56371     | 0,525814241  | 9,987264151 | 0,067465614 |
| A_55_P2101910 | NM_009438    | Rpl13a        | 22121     | 0,525705882  | 8,953754717 | 0,020981489 |
| A_52_P220879  | NM_009373    | Tgm2          | 21817     | 0,524939628  | 7,156509434 | 0,007731256 |
| A_51_P430900  | NM_013642    | Dusp1         | 19252     | 0,524010836  | 7,787       | 0,041558514 |
| A_52_P467389  | NM_023044    | Slc15a3       | 65221     | 0,522934985  | 6,531584906 | 0,001314986 |
| A_51_P308549  | NM_021422    | Dnaja4        | 58233     | 0,522362229  | 6,990320755 | 0,001941324 |
| A_55_P1995195 | NM_008037    | Fosl2         | 14284     | 0,521582043  | 7,02445283  | 0,000160945 |
| A_51_P414889  | NM_027320    | Ifi35         | 70110     | 0,519842105  | 7,645358491 | 0,009606594 |
| A_55_P1966660 | NM_001025208 | LOC547349     | 547349    | 0,519809598  | 9,77290566  | 0,090029678 |
| A_55_P2184189 | BC003730     | Ncf2          | 17970     | 0,519637771  | 8,607226415 | 0,032742574 |
| A_55_P2042713 | NM_011822    | Pigq          | 14755     | 0,519595975  | 10,50235849 | 0,002964356 |
| A_55_P2009121 | NM_021604    | Agrn          | 11603     | 0,518137771  | 6,841188679 | 0,002054421 |
| A_51_P311362  | AK015429     | 4930449E01Rik | 74864     | 0,517552632  | 8,622037736 | 0,099172572 |
| A_55_P1964615 | NM_133763    | Dnttip1       | 76233     | 0,51751548   | 7,316377358 | 0,000517793 |
| A_55_P2133248 | AK134184     | Gm8995        | 668139    | 0,517286378  | 8,156471698 | 0,000350976 |
| A_55_P2173629 | NM_001115154 | Samd3         | 268288    | 0,515606811  | 6,806075472 | 0,000589465 |
| A_55_P2077956 | NM_001099918 | Klrb1         | 100043861 | 0,513993808  | 6,764320755 | 0,000298957 |
| A_55_P2037787 | XM_001478340 | Gm3798        | 100042341 | 0,513893189  | 6,522490566 | 0,057400562 |
| A_55_P1967133 | NM_177741    | Ppp1r3b       | 244416    | 0,512787926  | 9,17409434  | 0,010342499 |
| A_51_P514029  | NM_010780    | Cma1          | 17228     | 0,512377709  | 6,43309434  | 0,020676128 |
| A_55_P2129047 | NM_133211    | Tlr7          | 170743    | 0,510244582  | 6,59409434  | 5,50E-05    |
| A_51_P466759  | NM_028993    | Mau2          | 74549     | 0,509069659  | 7,135584906 | 1,28E-05    |
| A_55_P1990653 | NM_001111062 | Comt          | 12846     | 0,508764706  | 8,342622642 | 0,024313265 |
| A_51_P235726  | NM_023892    | Icam4         | 78369     | 0,507713622  | 6,965981132 | 0,00288003  |
| A_55_P1998912 | NM_013711    | Txnrd2        | 26462     | 0,505243034  | 10,11756604 | 0,090061002 |
| A_55_P2011061 | NM_173007    | Tspan12       | 269831    | 0,504922601  | 6,205245283 | 0,014869814 |
| A_52_P514407  | NM_013793    | Klra15        | 27423     | 0,504654799  | 7,087943396 | 0,035752543 |
| A_51_P374900  | NM_028808    | P2ry13        | 74191     | 0,504171827  | 6,296358491 | 2,57E-06    |
| A_51_P514712  | NM_001039530 | Parp14        | 547253    | 0,502931889  | 7,867943396 | 0,009112054 |
| A_52_P390127  | AK138801     | Klrc1         | 16641     | 0,502791022  | 6,587981132 | 0,001030904 |
| A_55_P2009774 | NM_009573    | Zic1          | 22771     | 0,500828173  | 8,643924528 | 0,02248494  |
| A_66_P124497  | NM_133976    | Imp3          | 102462    | -0,500249226 | 9,013283019 | 0,026712416 |
| A_55_P1987290 | NR_004413    | Rnu1b6        | 19847     | -0,500626935 | 11,20273585 | 0,056422071 |
| A_51_P322265  | NM_027817    | Grap          | 71520     | -0,501198142 | 8,352207547 | 0,002891602 |
| A_51_P162471  | NM_134081    | Dnajc9        | 108671    | -0,50226161  | 8,659679245 | 0,023911366 |
| A_55_P2088385 | NM_011618    | Tnnt1         | 21955     | -0,502724458 | 7,722660377 | 0,061192919 |
| A_55_P2037585 | NM_133977    | Trf           | 22041     | -0,507487616 | 6,91245283  | 0,088315896 |
| A_51_P278868  | NM_010387    | H2-DMb1       | 14999     | -0,508517028 | 9,351113208 | 0,077990894 |
| A_55_P2177539 | NM_011434    | Sod1          | 20655     | -0,508614551 | 11,09575472 | 0,004427294 |
| A_51_P104897  | NM_080553    | Itpr3         | 16440     | -0,509452012 | 8,637660377 | 0,015539934 |
| A_52_P552589  | NM_008279    | Map4k1        | 26411     | -0,509537152 | 8,794188679 | 0,024313265 |

|               |              |               |           |              |             |             |
|---------------|--------------|---------------|-----------|--------------|-------------|-------------|
| A_55_P2170225 | NM_172507    | Sh3bgrl2      | 212531    | -0,511726006 | 7,141698113 | 0,032551164 |
| A_51_P417469  | NM_026616    | Rnaseh2c      | 68209     | -0,513752322 | 9,744471698 | 0,007724    |
| A_55_P2097206 | NM_009793    | Camk4         | 12326     | -0,514781734 | 6,623132075 | 0,010060292 |
| A_55_P2057877 | NM_001163554 | Pou2f2        | 18987     | -0,514917957 | 7,119377358 | 0,000430652 |
| A_52_P532227  | NM_007901    | S1pr1         | 13609     | -0,515244582 | 8,622113208 | 0,022892462 |
| A_55_P1956973 | NM_011602    | Tln1          | 21894     | -0,516828173 | 10,93133962 | 0,080862226 |
| A_51_P475995  | NM_178060    | Thra          | 21833     | -0,51898452  | 7,150301887 | 0,001282124 |
| A_55_P1953356 | NM_001024716 | Triobp        | 110253    | -0,519082043 | 12,2319434  | 0,058424088 |
| A_55_P1964648 | NM_001037719 | Btla          | 208154    | -0,519393189 | 8,436037736 | 0,082979756 |
| A_51_P247157  | NM_008258    | Hn1           | 15374     | -0,520071207 | 8,214735849 | 0,001135028 |
| A_51_P100034  | NM_027162    | Mif4gd        | 69674     | -0,520373065 | 8,389245283 | 0,016573398 |
| A_55_P1960053 | NM_001042489 | Hvcn1         | 74096     | -0,521349845 | 9,118924528 | 0,064784011 |
| A_55_P2139181 | NM_145575    | Cald1         | 109624    | -0,521869969 | 6,556679245 | 0,02484757  |
| A_51_P327778  | NM_011070    | Pfdn2         | 18637     | -0,522239938 | 7,857811321 | 0,048283213 |
| A_55_P1965101 | NM_001081643 | Xlr3b         | 574437    | -0,522987616 | 7,144396226 | 0,08314768  |
| A_55_P2019083 | NM_001114334 | Rps6kb1       | 72508     | -0,523283282 | 8,411849057 | 0,015744574 |
| A_55_P1997751 | NM_138659    | Prpf8         | 192159    | -0,523806502 | 10,08213208 | 0,041019218 |
| A_52_P517896  | NM_028636    | Man2c1        | 73744     | -0,524882353 | 8,265716981 | 0,005024815 |
| A_52_P282500  | NM_001039472 | Kif21b        | 16565     | -0,524897833 | 10,05235849 | 0,081465312 |
| A_66_P133112  | AK075658     | Gm14635       | 100043946 | -0,526294118 | 12,75762264 | 0,088745789 |
| A_52_P78023   | NM_172397    | Limd2         | 67803     | -0,526611455 | 12,52677358 | 0,022503962 |
| A_55_P2021841 | NM_007590    | Calm3         | 12315     | -0,529865325 | 12,65601887 | 0,01617229  |
| A_55_P2005853 | NM_001037098 | Nacc2         | 67991     | -0,530117647 | 7,360075472 | 0,007711143 |
| A_55_P1996299 | NM_001039055 | Pofut1        | 140484    | -0,530201238 | 7,829339623 | 0,001155107 |
| A_51_P357573  | NM_145575    | Cald1         | 109624    | -0,530698142 | 6,699132075 | 0,026713762 |
| A_66_P129048  | NM_001190445 | 2610002J02Rik | 67513     | -0,531527864 | 9,212716981 | 0,001577031 |
| A_55_P2050877 | NM_138752    | Plekhg2       | 101497    | -0,532702786 | 8,646207547 | 0,007446848 |
| A_55_P2118570 | NM_007645    | Cd37          | 12493     | -0,53321517  | 10,21164151 | 0,000164603 |
| A_51_P490348  | NM_025423    | 1110059E24Rik | 66206     | -0,533447368 | 7,232264151 | 0,005264724 |
| A_55_P2174490 | NM_007645    | Cd37          | 12493     | -0,533464396 | 7,958169811 | 0,002293462 |
| A_51_P407323  | NM_007976    | F5            | 14067     | -0,534       | 7,199566038 | 0,072720231 |
| A_51_P517870  | NM_198429    | Nfatc1        | 18018     | -0,534760062 | 7,879264151 | 0,022412794 |
| A_51_P418526  | NM_027324    | Sfxn1         | 14057     | -0,535029412 | 8,021226415 | 0,013040657 |
| A_55_P2305420 | AK038263     | D9Wsu90e      | 27962     | -0,535625387 | 6,433924528 | 0,001748339 |
| A_51_P519364  | NM_145986    | Fam83f        | 213956    | -0,537665635 | 14,17307547 | 0,058694006 |
| A_52_P418665  | NM_029512    | Ttpal         | 76080     | -0,537749226 | 8,002339623 | 0,010432633 |
| A_55_P2183208 | NM_001045532 | Prl2c1        | 666317    | -0,538283282 | 6,528471698 | 0,011871383 |
| A_51_P232858  | NM_025974    | Rpl14         | 67115     | -0,538382353 | 6,251377358 | 0,000960907 |
| A_51_P302358  | NM_008518    | Ltb           | 16994     | -0,540673375 | 11,32532075 | 0,037962847 |
| A_55_P2089233 | NM_011136    | Pou2af1       | 18985     | -0,540879257 | 9,07345283  | 0,065933624 |
| A_52_P453884  | NM_019739    | Foxo1         | 56458     | -0,542879257 | 7,831735849 | 0,000833518 |
| A_55_P2142430 | NM_001033350 | Bank1         | 242248    | -0,544255418 | 7,108566038 | 0,000169027 |
| A_52_P260994  | NM_013710    | Fgd2          | 26382     | -0,547770898 | 7,59145283  | 0,097365752 |
| A_55_P2015426 | NM_133728    | Asnsd1        | 70396     | -0,549897833 | 7,996396226 | 0,005147837 |
| A_55_P2409088 | AK138015     | BB163080      | 106459    | -0,551642415 | 7,17709434  | 0,004725668 |
| A_55_P2004746 | NM_183319    | Xkrx          | 331524    | -0,553770898 | 7,471301887 | 0,011015933 |
| A_55_P2072985 | NM_001076554 | Sptan1        | 20740     | -0,554369969 | 8,817528302 | 0,005173529 |
| A_55_P1957038 | NM_181796    | Gstp2         | 14869     | -0,554849845 | 11,18941509 | 0,004217308 |
| A_51_P406796  | NM_013873    | Sult4a1       | 29859     | -0,555379257 | 6,157754717 | 0,00388012  |
| A_66_P124858  | NM_001024474 | Diras2        | 68203     | -0,557840557 | 7,032754717 | 0,006180773 |

|               |              |               |           |              |             |             |
|---------------|--------------|---------------|-----------|--------------|-------------|-------------|
| A_55_P2152009 | NM_021344    | Tesc          | 57816     | -0,558260062 | 9,377339623 | 0,036652445 |
| A_51_P193794  | NM_008512    | Lrp1          | 16971     | -0,559859133 | 7,010207547 | 0,07656962  |
| A_51_P427663  | NM_007725    | Cnn2          | 12798     | -0,561196594 | 10,25443396 | 0,036850893 |
| A_55_P2154595 | NM_017404    | Mrpl39        | 27393     | -0,564789474 | 6,906528302 | 0,002122728 |
| A_51_P421664  | NM_133739    | Tmem123       | 71929     | -0,565278638 | 8,888       | 0,014247952 |
| A_55_P2124586 | NM_001081642 | Xlr4a         | 434794    | -0,566798762 | 7,180396226 | 0,035256199 |
| A_55_P1980302 | NM_025498    | Psenen        | 66340     | -0,566989164 | 11,15288679 | 0,068575062 |
| A_51_P140942  | NM_018739    | Rp9           | 55934     | -0,568298762 | 8,398358491 | 0,003068395 |
| A_51_P121447  | NM_054099    | 1110038F14Rik | 117171    | -0,569210526 | 7,788943396 | 0,005664358 |
| A_51_P292357  | NM_016959    | Rps3a1        | 20091     | -0,569232198 | 11,48664151 | 0,0216602   |
| A_51_P365409  | NM_028040    | Rpusd4        | 71989     | -0,570301858 | 6,308169811 | 2,60E-06    |
| A_51_P143805  | NM_025339    | Tmem42        | 66079     | -0,573778638 | 7,63845283  | 0,001666883 |
| A_66_P125862  | NR_015487    | A930005H10Rik | 68161     | -0,574922601 | 7,991660377 | 0,011156832 |
| A_55_P1981964 | AK004668     | Tnfrsf13b     | 57916     | -0,580153251 | 8,168226415 | 0,003188176 |
| A_55_P1987770 | NM_025498    | Psenen        | 66340     | -0,582198142 | 11,74916981 | 0,053634025 |
| A_52_P276792  | NM_053202    | Foxp1         | 108655    | -0,583678019 | 7,838698113 | 0,001438135 |
| A_55_P2391619 | BG063913     | AI449595      | 58901     | -0,585113003 | 6,452566038 | 0,073109841 |
| A_55_P2079076 | NM_001044308 | Cacna1i       | 239556    | -0,585450464 | 6,834150943 | 0,000592971 |
| A_55_P2150734 | BC004786     | Igh-VJ558     | 16061     | -0,58593808  | 7,128358491 | 0,098788873 |
| A_51_P202050  | NM_008052    | Dtx1          | 14357     | -0,588743034 | 8,853       | 0,024313265 |
| A_51_P384148  | NM_013649    | Ryk           | 20187     | -0,589552632 | 6,220150943 | 0,026729564 |
| A_55_P2024431 | NM_008064    | Gaa           | 14387     | -0,590130031 | 7,349679245 | 0,003441537 |
| A_52_P417859  | NM_025757    | Gid4          | 66771     | -0,591356037 | 6,837886792 | 0,000160945 |
| A_55_P2174743 | NM_018747    | Akap7         | 432442    | -0,594770898 | 8,306603774 | 0,045655328 |
| A_51_P391955  | NM_029723    | Dapl1         | 76747     | -0,594890093 | 8,947943396 | 0,0131758   |
| A_55_P2008907 | NM_009609    | Actg1         | 11465     | -0,597475232 | 12,91807547 | 0,010332345 |
| A_52_P125350  | NM_023210    | Anp32e        | 66471     | -0,601105263 | 8,667509434 | 0,027984913 |
| A_55_P1974554 | NM_145625    | Eif4b         | 75705     | -0,606679567 | 8,858716981 | 0,038114201 |
| A_51_P199135  | NM_009856    | Cd83          | 12522     | -0,60729257  | 7,922320755 | 0,006018432 |
| A_55_P2046101 | NM_021365    | Xlr4b         | 27083     | -0,608452012 | 7,173169811 | 0,033266181 |
| A_55_P2007196 | NM_001177307 | Aldoa         | 11674     | -0,614823529 | 12,17541509 | 0,00081807  |
| A_51_P232281  | NM_011109    | Pla2g2d       | 18782     | -0,618083591 | 6,530716981 | 0,000150694 |
| A_52_P252737  | NM_011241    | Rangap1       | 19387     | -0,620032508 | 7,813283019 | 0,00953741  |
| A_55_P2087622 | NM_010215    | Il4i1         | 14204     | -0,624772446 | 8,254113208 | 0,051940574 |
| A_55_P2076871 | AK083328     | Lef1          | 16842     | -0,625159443 | 10,70715094 | 0,012127965 |
| A_55_P2043182 | NM_153175    | Gimap6        | 231931    | -0,625580495 | 10,528      | 0,003990645 |
| A_55_P2083121 | NM_001164567 | Vill          | 22351     | -0,625911765 | 6,763528302 | 0,004530881 |
| A_55_P2113523 | NM_001177884 | Whsc1         | 107823    | -0,627342105 | 8,068603774 | 0,090029678 |
| A_51_P221632  | NM_026091    | 1700037H04Rik | 67326     | -0,629250774 | 12,09030189 | 0,080381789 |
| A_55_P1971729 | NM_007758    | Cr2           | 12902     | -0,62969195  | 8,396584906 | 0,021902855 |
| A_55_P2019577 | NR_027818    | 1500011B03Rik | 66236     | -0,629832817 | 7,256622642 | 0,012410199 |
| A_55_P1953301 | NM_146126    | Sord          | 20322     | -0,635834365 | 7,625735849 | 0,034526305 |
| A_55_P2070686 | NM_027057    | Wdfy1         | 69368     | -0,640074303 | 11,36224528 | 0,00141712  |
| A_52_P77245   | NM_172277    | Snx8          | 231834    | -0,641739938 | 7,626471698 | 0,000600734 |
| A_55_P2052425 | NM_145482    | Setd4         | 224440    | -0,642388545 | 7,404150943 | 0,006047609 |
| A_55_P2099650 | NM_053195    | Slc24a3       | 94249     | -0,647026316 | 8,69054717  | 0,071306362 |
| A_51_P154485  | NM_145141    | Fcrla         | 98752     | -0,649065015 | 7,355433962 | 0,0028043   |
| A_66_P115061  | NM_025695    | Smc6          | 67241     | -0,649396285 | 7,119962264 | 0,018145875 |
| A_55_P2332731 | AK051661     | D130062J21Rik | 100038651 | -0,655721362 | 8,679283019 | 0,024685976 |
| A_52_P199614  | NM_001146022 | Wdfy4         | 545030    | -0,665964396 | 9,191169811 | 0,007539411 |

|               |              |               |        |              |             |             |
|---------------|--------------|---------------|--------|--------------|-------------|-------------|
| A_51_P266248  | AK134885     | Ighv14-2      | 668421 | -0,666181115 | 10,32415094 | 0,00953741  |
| A_55_P2112737 | NM_007393    | Actb          | 11461  | -0,668354489 | 15,49101887 | 0,011262914 |
| A_52_P613498  | NM_026127    | 4833420G17Rik | 67392  | -0,669181115 | 7,981075472 | 0,067739361 |
| A_55_P2117345 | NM_013517    | Fcer2a        | 14128  | -0,676247678 | 6,882924528 | 0,000202519 |
| A_55_P2023542 | NM_007719    | Ccr7          | 12775  | -0,677027864 | 11,1370566  | 0,003355547 |
| A_52_P277104  | NM_001033350 | Bank1         | 242248 | -0,677297214 | 7,699018868 | 0,001105833 |
| A_51_P362054  | NM_025983    | Atp5e         | 67126  | -0,678987616 | 11,7544717  | 4,90E-05    |
| A_55_P2088825 | NM_053202    | Foxp1         | 108655 | -0,679106811 | 9,319811321 | 0,006945732 |
| A_55_P2101585 | NM_010016    | Cd55          | 13136  | -0,67999226  | 7,57490566  | 0,012003364 |
| A_55_P2180869 | NM_029865    | Ocel1         | 77090  | -0,682162539 | 8,368245283 | 0,010108345 |
| A_52_P279425  | NM_032465    | Cd96          | 84544  | -0,68247678  | 7,259867925 | 0,000575583 |
| A_51_P428372  | NM_023785    | Ppbp          | 57349  | -0,686363777 | 12,37515094 | 0,098788873 |
| A_55_P2068812 | AK203298     | Pkm           | 18746  | -0,687391641 | 10,92454717 | 0,017700698 |
| A_55_P2079079 | NM_009844    | Cd19          | 12478  | -0,692565015 | 8,288339623 | 0,006316208 |
| A_55_P2117614 | NM_028075    | Tnfrsf13c     | 72049  | -0,694013932 | 7,604584906 | 0,00561741  |
| A_55_P2116650 | NR_002860    | A130040M12Rik | 319269 | -0,694947368 | 10,21486792 | 0,085028845 |
| A_51_P397920  | NM_001033279 | D17Wsu92e     | 224647 | -0,695520124 | 10,15260377 | 0,034033226 |
| A_55_P2337138 | AK003962     | Ago2          | 239528 | -0,697399381 | 8,477283019 | 0,032547082 |
| A_55_P2028600 | NM_022410    | Myh9          | 17886  | -0,69751548  | 11,39609434 | 0,006986487 |
| A_55_P1986296 | NM_178598    | Tagln2        | 21346  | -0,702106811 | 13,02456604 | 0,01134711  |
| A_51_P322273  | NM_008975    | Ptp4a3        | 19245  | -0,706229102 | 12,661      | 0,013535438 |
| A_51_P138044  | NM_019739    | Foxo1         | 56458  | -0,70947678  | 8,285188679 | 0,000327965 |
| A_55_P2030506 | NM_018739    | Rp9           | 55934  | -0,715749226 | 7,470528302 | 0,000123272 |
| A_55_P2106175 | NM_008102    | Gch1          | 14528  | -0,72325387  | 8,951132075 | 0,057684859 |
| A_52_P390944  | NM_016803    | Chst3         | 53374  | -0,727379257 | 7,96709434  | 0,000685234 |
| A_55_P2001920 | NM_010227    | Flna          | 192176 | -0,734233746 | 11,45175472 | 0,00659087  |
| A_55_P2003221 | NM_031247    | Gimap3        | 83408  | -0,735981424 | 9,635981132 | 0,018025084 |
| A_55_P2297485 | AK075904     | Ago2          | 239528 | -0,739433437 | 8,518037736 | 0,013784338 |
| A_66_P136801  | NR_002864    | Peg13         | 353342 | -0,748380805 | 7,620830189 | 2,85E-06    |
| A_55_P1957168 | NM_133777    | Ube2s         | 77891  | -0,751544892 | 11,20975472 | 0,078791852 |
| A_52_P644972  | NM_175245    | Mzt1          | 76789  | -0,751916409 | 7,489150943 | 0,067756598 |
| A_51_P269084  | NM_175329    | Chchd10       | 103172 | -0,755928793 | 11,35683019 | 0,007148187 |
| A_52_P478256  | NM_178614    | Samm50        | 68653  | -0,756060372 | 7,563283019 | 0,074942278 |
| A_51_P449325  | NM_008206    | H2-Oa         | 15001  | -0,757883901 | 8,65545283  | 0,000130642 |
| A_51_P247359  | NM_016933    | Ptprcap       | 19265  | -0,763419505 | 11,0900566  | 0,002476394 |
| A_51_P505823  | NM_028013    | Endod1        | 71946  | -0,776605263 | 8,54409434  | 0,019591046 |
| A_55_P2144526 | NM_001080381 | Fam65b        | 193385 | -0,778126935 | 9,052754717 | 0,009696752 |
| A_51_P457528  | NM_007630    | Ccnb2         | 12442  | -0,782264706 | 8,360830189 | 0,014468837 |
| A_51_P194628  | NM_173037    | Tango6        | 272538 | -0,788243034 | 10,61298113 | 0,022892462 |
| A_51_P415809  | NM_026954    | Tusc1         | 69136  | -0,801470588 | 8,966150943 | 0,02278191  |
| A_55_P2108943 | NM_009835    | Ccr6          | 12458  | -0,808249226 | 8,086867925 | 0,005524517 |
| A_51_P270733  | NM_009303    | Syng1         | 20972  | -0,817043344 | 8,102509434 | 0,07606077  |
| A_55_P2002757 | NM_008528    | Blnk          | 17060  | -0,817956656 | 9,381358491 | 0,002762857 |
| A_55_P2136906 | NM_009514    | Vpreb3        | 22364  | -0,820944272 | 8,790169811 | 0,004608473 |
| A_55_P2113703 | NM_019866    | Spib          | 272382 | -0,825565015 | 8,711660377 | 0,002120516 |
| A_55_P2082929 | NM_010389    | H2-Ob         | 15002  | -0,840743034 | 8,331660377 | 0,003940468 |
| A_51_P226269  | NM_025427    | Rgcc          | 66214  | -0,84203096  | 7,799433962 | 5,98E-05    |
| A_55_P2019113 | NM_001024848 | Apol7b        | 278679 | -0,84623065  | 7,136075472 | 0,006870251 |
| A_51_P284608  | NM_001042605 | Cd74          | 16149  | -0,852091331 | 11,25315094 | 0,005085532 |
| A_55_P1953459 | NM_001171147 | Yap1          | 22601  | -0,862690402 | 7,373792453 | 0,007705719 |

|               |           |               |           |              |             |             |
|---------------|-----------|---------------|-----------|--------------|-------------|-------------|
| A_51_P365019  | NM_010295 | Gclc          | 14629     | -0,900608359 | 6,852169811 | 2,57E-06    |
| A_55_P2085295 | NM_198411 | Inf2          | 70435     | -0,905029412 | 9,258584906 | 0,00486563  |
| A_52_P70796   | NM_007551 | Cxcr5         | 12145     | -0,922167183 | 8,127       | 4,82E-05    |
| A_55_P2000107 | NM_009720 | Atox1         | 11927     | -0,942287926 | 11,49043396 | 0,002667884 |
| A_51_P342652  | NM_008339 | Cd79b         | 15985     | -0,957462848 | 11,19990566 | 0,001645397 |
| A_51_P378298  | NM_026976 | Faim3         | 69169     | -0,964986068 | 9,829679245 | 0,000639315 |
| A_66_P123055  | NR_033535 | Gm10845       | 100038734 | -0,975589783 | 9,400113208 | 0,063385275 |
| A_52_P553890  | NM_016780 | Itgb3         | 16416     | -1,000154799 | 10,65392453 | 0,009247668 |
| A_55_P2055875 | NM_025368 | Josd2         | 66124     | -1,032278638 | 7,545584906 | 0,055797199 |
| A_66_P132493  | NM_031181 | Siglece       | 83382     | -1,038413313 | 11,89141509 | 0,09474964  |
| A_55_P2146560 | NM_207105 | H2-Ab1        | 14961     | -1,065071207 | 12,04635849 | 0,000870906 |
| A_51_P286814  | NM_011424 | Ncor2         | 20602     | -1,0785      | 8,515867925 | 6,89E-06    |
| A_55_P1962747 | NM_207105 | H2-Ab1        | 14961     | -1,084640867 | 11,99275472 | 0,000290242 |
| A_55_P2064351 | NM_011703 | Vipr1         | 22354     | -1,098657895 | 7,832641509 | 0,007296493 |
| A_55_P1983754 | NM_025557 | Pcp4l1        | 66425     | -1,115540248 | 9,870471698 | 0,089417616 |
| A_51_P295215  | NM_172943 | Alkbh5        | 268420    | -1,120078947 | 9,318962264 | 1,20E-05    |
| A_51_P237752  | NM_008986 | Ptrf          | 19285     | -1,125379257 | 9,224415094 | 0,020628085 |
| A_52_P483336  | NM_007641 | Ms4a1         | 12482     | -1,136952012 | 9,384207547 | 0,00013066  |
| A_51_P105520  | NM_153057 | Nomo1         | 211548    | -1,143179567 | 9,098886792 | 0,00045239  |
| A_55_P2211164 | AK017236  | 5330406M23Rik | 76671     | -1,143894737 | 7,673924528 | 0,004836778 |
| A_51_P103397  | NM_011708 | Vwf           | 22371     | -1,146165635 | 9,693433962 | 0,018183469 |
| A_55_P2060630 | NM_027886 | Stk11ip       | 71728     | -1,180390093 | 7,26254717  | 0,056358549 |
| A_55_P2078735 | NR_015519 | Al662270      | 100043636 | -1,257419505 | 6,636962264 | 0,004552273 |
| A_55_P1956457 | NM_029998 | 6030458C11Rik | 77877     | -1,265931889 | 7,272528302 | 0,003371748 |
| A_52_P37894   | NM_009945 | Cox7a2        | 12866     | -1,317122291 | 10,35673585 | 6,24E-05    |
| A_52_P562676  | NM_013873 | Sult4a1       | 29859     | -1,345410217 | 8,022830189 | 0,004262494 |
| A_55_P1991770 | NM_019417 | Pdlim4        | 30794     | -1,39148452  | 8,181018868 | 1,18E-07    |
| A_55_P2141938 | NR_027875 | 1810058I24Rik | 67705     | -1,463908669 | 6,904584906 | 0,011149522 |
| A_55_P2008061 | NM_019923 | Itpr2         | 16439     | -1,489427245 | 9,117113208 | 4,13E-06    |
| A_51_P254471  | NM_007465 | Birc2         | 11797     | -1,63005418  | 7,60190566  | 3,11E-06    |
| A_55_P2017929 | NM_013492 | Clu           | 12759     | -1,862770898 | 11,74803774 | 0,001313209 |
| A_51_P343517  | NM_010742 | Ly6d          | 17068     | -2,105518576 | 8,364867925 | 3,83E-05    |
