# Supplementary material for: Of mice and men: the host response to influenza virus infection
Source: PubMed Central journal article supplement (PMC6132725; doi:10.1007/s00335-018-9750-y), 2018-06-15
Supplement: 335_2018_9750_MOESM7_ESM.pdf [file 335_2018_9750_MOESM7_ESM.pdf]

| PROBE         | ACCNUM       | SYMBOL        | ENTREZID  | logFC       | AveExpr     | adj.P.Val |
|---------------|--------------|---------------|-----------|-------------|-------------|-----------|
| A_51_P421876  | NM_016850    | Irf7          | 54123     | 3,296032591 | 10,70365741 | 1,95E-22  |
| A_51_P359570  | NM_010501    | Ifit3         | 15959     | 3,141036566 | 9,212074074 | 4,91E-22  |
| A_51_P387123  | NM_011854    | Oasl2         | 23962     | 3,093007154 | 9,684194444 | 1,28E-24  |
| A_55_P1998943 | NM_145211    | Oas1a         | 246730    | 2,985067568 | 10,22832407 | 3,87E-20  |
| A_51_P304170  | NM_023386    | Rtp4          | 67775     | 2,715515898 | 10,04310185 | 2,92E-24  |
| A_55_P2086433 | NM_145209    | Oasl1         | 231655    | 2,691571542 | 9,355342593 | 1,65E-20  |
| A_51_P154842  | NM_145153    | Oas1f         | 243262    | 2,615720191 | 9,37987037  | 1,65E-20  |
| A_55_P2019719 | NM_145227    | Oas2          | 246728    | 2,607496025 | 8,894       | 5,83E-23  |
| A_55_P1972872 | NM_001005858 | I830012O16Rik | 667370    | 2,530499205 | 8,005537037 | 5,64E-19  |
| A_66_P101942  | AK019325     | Gm9706        | 677168    | 2,479613672 | 12,51125926 | 5,49E-14  |
| A_51_P327751  | NM_008331    | Ifit1         | 15957     | 2,432302862 | 8,924842593 | 7,16E-20  |
| A_55_P1961499 | NM_010741    | Ly6c1         | 17067     | 2,38691097  | 9,576240741 | 4,85E-16  |
| A_52_P90363   | NM_029803    | Ifi27l2a      | 76933     | 2,376387122 | 13,27682407 | 1,02E-17  |
| A_55_P2103698 | NM_015783    | Isg15         | 100038882 | 2,345444356 | 15,35191667 | 1,20E-15  |
| A_51_P346938  | NM_029796    | Lrg1          | 76905     | 2,304209857 | 9,751222222 | 1,71E-10  |
| A_55_P2064771 | NM_010741    | Ly6c1         | 17067     | 2,293054054 | 12,04116667 | 1,64E-17  |
| A_51_P183812  | NM_011410    | Sfn4          | 20558     | 2,263883148 | 7,98312037  | 1,32E-14  |
| A_66_P128537  | NM_015783    | Isg15         | 100038882 | 2,255665342 | 11,54834259 | 3,78E-12  |
| A_55_P1998471 | NM_009114    | S100a9        | 20202     | 2,205472178 | 14,84983333 | 1,19E-12  |
| A_51_P359636  | NM_011150    | Lgals3bp      | 19039     | 2,200718601 | 10,68087037 | 7,05E-21  |
| A_55_P2048607 | NM_017370    | Hp            | 15439     | 2,175369634 | 11,91547222 | 2,37E-15  |
| A_55_P2114953 | NM_011909    | Usp18         | 24110     | 2,173054054 | 8,754444444 | 4,59E-17  |
| A_52_P398925  | NM_173869    | Stfa2l1       | 268885    | 2,155852146 | 8,768981481 | 1,70E-07  |
| A_55_P1998942 | NM_145211    | Oas1a         | 246730    | 2,145850556 | 8,301481481 | 3,87E-20  |
| A_51_P256827  | NM_013650    | S100a8        | 20201     | 2,067368045 | 12,42182407 | 1,37E-05  |
| A_66_P139618  | NM_001082545 | Stfa2         | 20862     | 2,047139905 | 9,014611111 | 3,84E-07  |
| A_51_P203955  | NM_010260    | Gbp2          | 14469     | 1,981961844 | 9,060981481 | 4,54E-09  |
| A_55_P1962305 | NM_139198    | Plac8         | 231507    | 1,981864865 | 11,69644444 | 1,06E-14  |
| A_55_P2146254 | NM_001112715 | Ifitm1        | 68713     | 1,966537361 | 10,30364815 | 6,61E-12  |
| A_51_P254656  | NM_008230    | Hdc           | 15186     | 1,937874404 | 9,491685185 | 1,12E-14  |
| A_51_P288138  | NM_008039    | Fpr2          | 14289     | 1,897949921 | 8,399564815 | 3,59E-15  |
| A_51_P401907  | NM_001082547 | Gm5483        | 433016    | 1,866343402 | 7,960555556 | 2,52E-06  |
| A_51_P128876  | NM_025378    | Ifitm3        | 66141     | 1,849777424 | 11,39935185 | 1,45E-16  |
| A_52_P700056  | NM_001081957 | Wfdc17        | 100034251 | 1,847713037 | 8,712731481 | 1,70E-05  |
| A_52_P559975  | NM_009909    | Cxcr2         | 12765     | 1,841346582 | 9,361222222 | 5,19E-13  |
| A_51_P231320  | NM_008611    | Mmp8          | 17394     | 1,832840223 | 7,988305556 | 4,85E-16  |
| A_55_P2062246 | NM_001145164 | Tgtp2         | 100039796 | 1,802101749 | 11,54368519 | 1,10E-21  |
| A_51_P413866  | NM_008198    | Cfb           | 14962     | 1,79527027  | 7,488592593 | 6,92E-14  |
| A_51_P212754  | NM_009369    | Tgfb1         | 21810     | 1,7796407   | 10,29614815 | 1,92E-13  |
| A_55_P1957459 | NM_013532    | Lilrb4        | 14728     | 1,716937997 | 9,597185185 | 3,51E-13  |
| A_55_P1990919 | NM_013759    | Msrb1         | 27361     | 1,706054054 | 13,29546296 | 6,70E-15  |
| A_55_P2081164 | NM_001169153 | Cd300lf       | 246746    | 1,700062798 | 9,306916667 | 1,41E-12  |
| A_51_P262171  | NM_008326    | Irgm1         | 15944     | 1,691515898 | 8,749972222 | 1,21E-23  |
| A_52_P422494  | NM_145634    | Cd300lf       | 246746    | 1,689848172 | 9,118064815 | 1,02E-12  |
| A_55_P1994042 | NM_001139519 | Zbp1          | 58203     | 1,675843402 | 9,489027778 | 1,63E-18  |
| A_51_P265495  | NM_010738    | Ly6a          | 110454    | 1,667430843 | 10,22585185 | 3,63E-10  |
| A_51_P174961  | NM_007972    | F10           | 14058     | 1,666419714 | 8,43562963  | 4,65E-13  |
| A_51_P294555  | NM_001033632 | Ifitm6        | 213002    | 1,664072337 | 9,409638889 | 5,72E-17  |
| A_55_P2004016 | NM_030209    | Crispld2      | 78892     | 1,663479332 | 7,59437963  | 3,71E-10  |
| A_51_P246653  | NM_020008    | Clec7a        | 56644     | 1,658694754 | 9,945777778 | 4,71E-13  |

|               |              |               |           |             |             |             |
|---------------|--------------|---------------|-----------|-------------|-------------|-------------|
| A_51_P181517  | NM_144559    | Fcgr4         | 246256    | 1,657066773 | 8,551574074 | 1,47E-17    |
| A_55_P2110758 | NM_177083    | B430306N03Rik | 320148    | 1,653955485 | 8,908148148 | 1,29E-18    |
| A_51_P470079  | NM_010555    | Il1r2         | 16178     | 1,643441176 | 7,70362037  | 3,11E-11    |
| A_52_P425839  | NM_181596    | Retnlg        | 245195    | 1,595478537 | 11,72646296 | 3,83E-09    |
| A_55_P1955308 | NM_001002898 | Sirpb1a       | 320832    | 1,560505564 | 9,976       | 1,59E-09    |
| A_51_P325856  | NM_026985    | Mcomp1        | 69189     | 1,558689984 | 8,491314815 | 3,13E-14    |
| A_55_P2052016 | NM_030209    | Crispld2      | 78892     | 1,546930048 | 7,358462963 | 4,74E-10    |
| A_55_P1998578 | NM_030694    | Ifitm2        | 80876     | 1,541699523 | 9,389555556 | 1,98E-18    |
| A_55_P2179413 | NM_011150    | Lgals3bp      | 19039     | 1,540108903 | 9,969083333 | 1,61E-17    |
| A_55_P2171116 | NM_001145953 | Lgals3        | 16854     | 1,529147854 | 10,84292593 | 1,04E-11    |
| A_52_P472324  | NM_011414    | Slpi          | 20568     | 1,514941971 | 11,62539815 | 5,70E-10    |
| A_66_P139683  | NM_021394    | Zbp1          | 58203     | 1,51036089  | 7,695259259 | 9,78E-18    |
| A_55_P2091461 | NM_007609    | Casp4         | 12363     | 1,503631161 | 8,914148148 | 6,72E-08    |
| A_55_P2005783 | NM_027835    | Ifih1         | 71586     | 1,493653418 | 7,65037037  | 8,97E-18    |
| A_55_P1966833 | NM_001037713 | Xaf1          | 327959    | 1,493009539 | 8,31037037  | 5,28E-16    |
| A_55_P2033041 | NM_001173460 | Sirpb1b       | 668101    | 1,489712242 | 9,812111111 | 1,13E-11    |
| A_51_P472867  | NM_145226    | Oas3          | 246727    | 1,486067568 | 8,037731481 | 9,95E-13    |
| A_51_P362066  | NM_007695    | Chil1         | 12654     | 1,46668124  | 7,834212963 | 3,84E-10    |
| A_51_P474459  | NM_007707    | Socs3         | 12702     | 1,463940382 | 9,444805556 | 1,74E-14    |
| A_51_P326191  | NM_009251    | Serpina3g     | 20715     | 1,463046105 | 8,300722222 | 2,48E-09    |
| A_51_P169516  | NM_001085501 | Ppp1r3d       | 228966    | 1,455982512 | 8,1105      | 3,33E-12    |
| A_55_P2092826 | NM_010730    | Anxa1         | 16952     | 1,455852941 | 10,46717593 | 1,16E-09    |
| A_55_P2046145 | AK137448     | Gm10693       | 675749    | 1,445852941 | 9,645824074 | 2,44E-12    |
| A_51_P225793  | NM_175181    | Prr5l         | 72446     | 1,438431638 | 9,337268519 | 1,92E-16    |
| A_55_P1999561 | NM_001002842 | Pram1         | 378460    | 1,435372814 | 7,970731481 | 8,98E-13    |
| A_55_P2066578 | BC010546     | Ifi204        | 15951     | 1,431655008 | 7,464037037 | 6,15E-11    |
| A_51_P464918  | NM_019453    | Mefv          | 54483     | 1,424432432 | 8,252       | 1,63E-15    |
| A_51_P108226  | NM_183249    | Wfdc21        | 66107     | 1,423648649 | 7,609962963 | 5,36E-06    |
| A_51_P281089  | NM_011313    | S100a6        | 20200     | 1,419024642 | 11,91732407 | 6,66E-12    |
| A_51_P452779  | NM_133198    | Pygl          | 110095    | 1,418732909 | 10,10938889 | 1,33E-11    |
| A_55_P2151685 | NM_011088    | Pira11        | 18724     | 1,418077901 | 9,310351852 | 2,44E-12    |
| A_55_P1955305 | NM_001002898 | Sirpb1a       | 320832    | 1,417979332 | 9,452166667 | 1,10E-12    |
| A_55_P2016462 | NM_021274    | Cxcl10        | 15945     | 1,41759062  | 6,928194444 | 2,39E-16    |
| A_51_P444447  | NM_007679    | Cebpd         | 12609     | 1,415379968 | 9,967944444 | 8,42E-08    |
| A_55_P2172001 | NM_001172588 | Mrgpra2a      | 668727    | 1,414960254 | 8,042833333 | 3,98E-10    |
| A_51_P129012  | NM_009735    | B2m           | 12010     | 1,412381558 | 14,10603704 | 2,89E-11    |
| A_55_P2079579 | NM_011094    | Pira7         | 18730     | 1,411310811 | 9,714509259 | 2,67E-12    |
| A_52_P487686  | NM_001082546 | BC100530      | 100034684 | 1,400071542 | 8,753925926 | 0,000889056 |
| A_51_P212782  | NM_008361    | Il1b          | 16176     | 1,396609698 | 9,329083333 | 1,96E-09    |
| A_52_P375312  | NM_001005421 | Amica1        | 270152    | 1,396417329 | 9,809657407 | 4,52E-08    |
| A_55_P2017929 | NM_013492    | Clu           | 12759     | 1,395298092 | 13,37186111 | 4,60E-06    |
| A_55_P2019557 | NM_153101    | Mrgpra2b      | 235712    | 1,390950715 | 8,0935      | 9,52E-10    |
| A_52_P52618   | NM_007780    | Csf2rb        | 12983     | 1,385621622 | 9,030907407 | 1,09E-14    |
| A_55_P1959425 | NM_030696    | Slc16a3       | 80879     | 1,385209062 | 8,738212963 | 2,02E-13    |
| A_55_P1966838 | NM_001037713 | Xaf1          | 327959    | 1,377281399 | 7,471722222 | 0,003812014 |
| A_55_P1958250 | NM_030743    | Rnf114        | 81018     | 1,360161367 | 13,28763889 | 1,89E-13    |
| A_55_P1984168 | NM_007609    | Casp4         | 12363     | 1,354395072 | 8,429305556 | 2,73E-07    |
| A_55_P2015687 | NM_001164323 | Phf11d        | 219132    | 1,349829889 | 8,356148148 | 6,86E-12    |
| A_66_P119034  | NM_013737    | Pla2g7        | 27226     | 1,34836407  | 9,734055556 | 4,77E-11    |
| A_55_P1960238 | NM_172659    | Slc2a6        | 227659    | 1,343212242 | 9,056231481 | 2,35E-11    |
| A_55_P2048279 | NM_205820    | Tlr13         | 279572    | 1,341167727 | 9,177712963 | 1,06E-10    |

|               |              |               |           |             |             |             |
|---------------|--------------|---------------|-----------|-------------|-------------|-------------|
| A_55_P2059606 | NM_019963    | Stat2         | 20847     | 1,338186804 | 8,204935185 | 8,01E-16    |
| A_55_P2175880 | NM_019946    | Mgst1         | 56615     | 1,337504769 | 7,98987963  | 4,06E-14    |
| A_51_P364485  | NM_009396    | Tnfaip2       | 21928     | 1,336725755 | 8,619787037 | 3,54E-15    |
| A_55_P2067505 | NM_030696    | Slc16a3       | 80879     | 1,329567568 | 8,6775      | 2,64E-13    |
| A_51_P487690  | NM_133871    | Ifi44         | 99899     | 1,324338633 | 6,961740741 | 8,17E-15    |
| A_55_P2040838 | NM_001166672 | Gm14548       | 100038909 | 1,324161367 | 8,829972222 | 3,33E-12    |
| A_51_P151576  | NM_001001999 | Gp1bb         | 14724     | 1,322108903 | 9,916712963 | 5,98E-07    |
| A_52_P186937  | NM_020557    | Cmpk2         | 22169     | 1,321314785 | 7,344462963 | 6,46E-17    |
| A_51_P176156  | NM_001173459 | LOC100038947  | 100038947 | 1,321284579 | 8,532648148 | 1,00E-11    |
| A_51_P151182  | NM_011940    | Ifi202b       | 26388     | 1,32072655  | 7,578648148 | 1,61E-06    |
| A_55_P2079560 | NM_011090    | Lilra6        | 18726     | 1,319209062 | 9,715990741 | 1,38E-11    |
| A_55_P2031436 | NM_001164036 | Ly6e          | 17069     | 1,319081081 | 11,68631481 | 1,27E-11    |
| A_51_P405476  | NM_010185    | Fcer1g        | 14127     | 1,317529412 | 12,57672222 | 1,79E-19    |
| A_51_P333274  | NM_013542    | Gzmb          | 14939     | 1,310205087 | 7,880203704 | 4,35E-16    |
| A_55_P1999102 | NM_023734    | Pi16          | 74116     | 1,304987281 | 8,943481481 | 0,000970943 |
| A_55_P2097279 | NM_011095    | Pirb          | 18733     | 1,302069157 | 10,39480556 | 5,69E-09    |
| A_55_P2110713 | NM_007585    | Anxa2         | 12306     | 1,298155803 | 11,58838889 | 1,03E-10    |
| A_55_P2016852 | NM_011777    | Zyx           | 22793     | 1,296738474 | 12,99256481 | 2,99E-09    |
| A_51_P262515  | NM_172603    | Phf11a        | 219131    | 1,288905405 | 8,194138889 | 4,51E-12    |
| A_51_P192800  | NM_008175    | Grn           | 14824     | 1,280936407 | 8,198796296 | 1,21E-14    |
| A_66_P120567  | NM_010730    | Anxa1         | 16952     | 1,267305246 | 8,670074074 | 1,44E-09    |
| A_51_P149714  | NM_026835    | Ms4a6d        | 68774     | 1,267262321 | 7,214074074 | 1,64E-17    |
| A_52_P363216  | NM_133219    | Gcnt2         | 14538     | 1,265205087 | 7,80987037  | 1,54E-12    |
| A_55_P1963017 | NM_001082543 | Stfa1         | 20861     | 1,262506359 | 7,968638889 | 0,001532139 |
| A_51_P275454  | NM_009099    | Trim30a       | 20128     | 1,252987281 | 8,158351852 | 7,87E-15    |
| A_55_P2059154 | NM_001013371 | Dtx3l         | 209200    | 1,245415739 | 9,003046296 | 1,89E-16    |
| A_55_P2032167 | NM_008327    | Ifi202b       | 26388     | 1,232668521 | 7,457694444 | 9,82E-07    |
| A_55_P2109857 | NM_009061    | Rgs2          | 19735     | 1,225400636 | 10,73068519 | 1,62E-11    |
| A_51_P499838  | NM_009763    | Bst1          | 12182     | 1,225199523 | 7,387194444 | 1,11E-11    |
| A_55_P2068812 | AK203298     | Pkm           | 18746     | 1,222948331 | 12,00891667 | 2,33E-10    |
| A_55_P1974577 | NM_028728    | Nfam1         | 74039     | 1,221680445 | 9,612518519 | 3,24E-11    |
| A_55_P2137611 | NM_019440    | Irgm2         | 54396     | 1,220269475 | 8,195787037 | 1,53E-17    |
| A_55_P2118441 | NM_010846    | Mx1           | 17857     | 1,214844992 | 7,167305556 | 4,52E-08    |
| A_55_P2066230 | NM_001172117 | Hck           | 15162     | 1,208737679 | 10,16344444 | 1,34E-11    |
| A_55_P2472435 | NM_018734    | Gbp3          | 55932     | 1,206170111 | 7,853685185 | 6,17E-10    |
| A_52_P315976  | NM_009416    | Tpm2          | 22004     | 1,205753577 | 7,54437037  | 2,12E-05    |
| A_51_P312121  | NM_011723    | Xdh           | 22436     | 1,204172496 | 7,215787037 | 1,47E-17    |
| A_55_P2121408 | NM_009416    | Tpm2          | 22004     | 1,201646264 | 7,76887963  | 1,16E-05    |
| A_52_P527800  | NM_145158    | Emilin2       | 246707    | 1,20086407  | 9,937990741 | 2,30E-09    |
| A_52_P456640  | NM_010208    | Fgr           | 14191     | 1,198403816 | 8,336481481 | 4,14E-13    |
| A_52_P549827  | NM_019946    | Mgst1         | 56615     | 1,191693959 | 7,575472222 | 4,83E-14    |
| A_51_P512992  | NM_178676    | Entpd3        | 215446    | 1,190716216 | 6,763861111 | 1,61E-08    |
| A_66_P122086  | NM_001039720 | 9030619P08Rik | 105892    | 1,190306836 | 7,640462963 | 5,97E-10    |
| A_55_P2037697 | NM_001076679 | Gm9733        | 751864    | 1,188116057 | 7,711814815 | 4,12E-12    |
| A_55_P1975560 | NM_008329    | Ifi204        | 15951     | 1,180660572 | 9,329824074 | 8,33E-08    |
| A_55_P2165869 | NM_009883    | Cebpb         | 12608     | 1,178385533 | 9,524324074 | 8,42E-09    |
| A_51_P261517  | NM_011662    | Tyrobp        | 22177     | 1,177804452 | 11,69292593 | 1,17E-09    |
| A_55_P2172396 | NM_178796    | A530064D06Rik | 328830    | 1,175220986 | 7,339685185 | 4,89E-08    |
| A_55_P2081488 | NM_009402    | Pglyrp1       | 21946     | 1,17254372  | 9,253703704 | 6,29E-09    |
| A_55_P2079561 | NM_011090    | Lilra6        | 18726     | 1,160769475 | 10,35451852 | 1,20E-09    |
| A_55_P2070079 | NM_010708    | Lgals9        | 16859     | 1,156960254 | 8,228555556 | 9,08E-14    |

|               |              |          |        |             |             |             |
|---------------|--------------|----------|--------|-------------|-------------|-------------|
| A_55_P2011084 | AK172348     | Trim30b  | 244183 | 1,156854531 | 7,468953704 | 3,19E-11    |
| A_55_P1999213 | NM_146142    | Tdrd7    | 100121 | 1,150697138 | 8,862175926 | 1,84E-09    |
| A_51_P258372  | NM_030691    | Igsf6    | 80719  | 1,150415739 | 9,113953704 | 1,89E-13    |
| A_51_P352968  | NM_008538    | Marcks   | 17118  | 1,144345787 | 9,045824074 | 2,37E-09    |
| A_51_P441426  | NM_019932    | Pf4      | 56744  | 1,143436407 | 15,11558333 | 9,81E-07    |
| A_55_P1983523 | NM_145437    | Cd300ld  | 217305 | 1,141658983 | 8,609453704 | 3,14E-05    |
| A_55_P2093994 | NM_030700    | Maged2   | 80884  | 1,136999205 | 8,932231481 | 6,76E-08    |
| A_51_P237752  | NM_008986    | Ptrf     | 19285  | 1,136147059 | 10,40632407 | 0,000493868 |
| A_51_P383032  | NM_010819    | Clec4d   | 17474  | 1,133211447 | 9,815018519 | 1,17E-07    |
| A_55_P2130178 | NM_010233    | Fn1      | 14268  | 1,131542925 | 8,456287037 | 5,46E-05    |
| A_51_P153995  | NM_018762    | Gp9      | 54368  | 1,128844197 | 12,64255556 | 1,14E-06    |
| A_51_P308298  | NM_172118    | MyI9     | 98932  | 1,127644674 | 14,24152778 | 0,000317477 |
| A_55_P2051334 | NR_004446    | H2-K2    | 630499 | 1,12581717  | 12,67698148 | 8,35E-06    |
| A_52_P635338  | NM_010194    | Fes      | 14159  | 1,122967409 | 9,334175926 | 1,01E-10    |
| A_55_P2035757 | NR_026561    | Gm8884   | 667933 | 1,121180445 | 7,763657407 | 9,85E-09    |
| A_55_P2098697 | NM_009396    | Tnfaip2  | 21928  | 1,119900636 | 7,626898148 | 3,54E-15    |
| A_55_P2008740 | NM_010186    | Fcgr1    | 14129  | 1,119569157 | 6,835259259 | 1,17E-10    |
| A_52_P151853  | NM_001025262 | Tpd52    | 21985  | 1,112387917 | 8,111574074 | 2,05E-12    |
| A_52_P553890  | NM_016780    | Itgb3    | 16416  | 1,111596979 | 11,77412037 | 2,53E-05    |
| A_65_P19395   | NM_010380    | H2-D1    | 14964  | 1,111193164 | 12,52749074 | 1,78E-08    |
| A_55_P2136880 | NM_008654    | Ppp1r15a | 17872  | 1,109503975 | 11,29683333 | 5,31E-10    |
| A_51_P103397  | NM_011708    | Vwf      | 22371  | 1,109433227 | 10,86449074 | 0,000280302 |
| A_51_P490023  | NM_009450    | Tubb2a   | 22151  | 1,108751987 | 11,85825926 | 3,63E-06    |
| A_52_P459564  | NM_010575    | Itga2b   | 16399  | 1,106461049 | 10,13727778 | 7,63E-05    |
| A_66_P139546  | NM_008344    | Igfbp6   | 16012  | 1,103279014 | 7,514009259 | 4,14E-09    |
| A_55_P1962304 | NM_139198    | Plac8    | 231507 | 1,1011407   | 8,59125     | 8,01E-16    |
| A_52_P199633  | NM_199146    | Trim30d  | 209387 | 1,098410175 | 7,415055556 | 9,49E-16    |
| A_66_P133328  | NM_001025261 | Tpd52    | 21985  | 1,09663593  | 9,342222222 | 9,02E-13    |
| A_51_P159503  | AK173199     | Rnf213   | 672511 | 1,095391892 | 8,252046296 | 1,24E-10    |
| A_55_P1981479 | NM_008326    | Irgm1    | 15944  | 1,093715421 | 7,153574074 | 1,71E-22    |
| A_55_P1956130 | BC025170     | LOC68395 | 68395  | 1,093665342 | 11,79365741 | 9,56E-10    |
| A_55_P1957353 | XM_907302    | Slfn13l  | 631406 | 1,092869634 | 8,742259259 | 1,14E-09    |
| A_51_P499698  | NM_026414    | Asprv1   | 67855  | 1,084946741 | 8,288712963 | 1,23E-05    |
| A_55_P2054409 | NM_011089    | Pira2    | 18725  | 1,084029412 | 8,089731481 | 3,83E-10    |
| A_55_P2130970 | NM_001163576 | Parp10   | 671535 | 1,082426073 | 10,38657407 | 4,89E-10    |
| A_55_P1958255 | NM_030743    | Rnf114   | 81018  | 1,082298887 | 9,083222222 | 2,46E-09    |
| A_55_P2141699 | NM_001033135 | Rnf149   | 67702  | 1,080064388 | 8,44075     | 1,77E-10    |
| A_51_P474169  | NM_144883    | Proser2  | 227545 | 1,077435612 | 8,294537037 | 1,70E-07    |
| A_52_P577384  | NM_010531    | Il18bp   | 16068  | 1,075830684 | 6,818231481 | 9,94E-13    |
| A_55_P2065991 | NM_016740    | S100a11  | 20195  | 1,073603339 | 9,719175926 | 2,23E-08    |
| A_51_P161021  | NM_008332    | Ifit2    | 15958  | 1,072054054 | 7,404555556 | 1,67E-08    |
| A_52_P192426  | NM_011609    | Tnfrsf1a | 21937  | 1,071167727 | 8,849712963 | 1,12E-11    |
| A_52_P365011  | NM_010194    | Fes      | 14159  | 1,069860095 | 8,486611111 | 1,26E-11    |
| A_52_P282762  | NM_010851    | Myd88    | 17874  | 1,06958744  | 8,025953704 | 4,76E-15    |
| A_51_P241457  | NM_013532    | Lilrb4   | 14728  | 1,068683625 | 7,209481481 | 1,06E-14    |
| A_52_P466090  | NM_018851    | Samhd1   | 56045  | 1,068605723 | 8,733222222 | 4,02E-12    |
| A_51_P213691  | NM_011324    | Scnn1a   | 20276  | 1,067145469 | 7,913898148 | 8,21E-09    |
| A_51_P112355  | NM_018738    | Igtp     | 16145  | 1,066007154 | 11,02082407 | 6,92E-14    |
| A_51_P156274  | NM_010736    | Ltbr     | 17000  | 1,065555644 | 7,63825     | 2,27E-15    |
| A_55_P1992959 | NM_173019    | Pfkfb4   | 270198 | 1,065321145 | 9,056648148 | 2,99E-09    |
| A_51_P108108  | NM_153074    | Lrrc25   | 211228 | 1,061283784 | 7,932175926 | 2,18E-13    |

|               |               |               |           |             |             |             |
|---------------|---------------|---------------|-----------|-------------|-------------|-------------|
| A_55_P1962404 | NM_201410     | Ugt1a6b       | 394435    | 1,058127981 | 8,192101852 | 6,89E-09    |
| A_52_P223809  | NM_030150     | Dhx58         | 80861     | 1,057322734 | 7,039314815 | 2,13E-17    |
| A_55_P2125049 | AB359227      | Gm11127       | 100529082 | 1,057232114 | 11,90187037 | 1,02E-09    |
| A_55_P1983044 | NM_001081687  | Gm5150        | 381484    | 1,052779809 | 7,725731481 | 1,36E-09    |
| A_51_P493558  | NM_145417     | Rnpnp         | 215615    | 1,048091415 | 8,022842593 | 3,42E-16    |
| A_55_P2057936 | NM_001135115  | Gm12250       | 631323    | 1,045478537 | 7,986611111 | 8,97E-14    |
| A_51_P228768  | NM_011409     | Slfn3         | 20557     | 1,041708267 | 6,742527778 | 4,12E-06    |
| A_55_P2166501 | NM_009851     | Cd44          | 12505     | 1,041604134 | 8,228074074 | 1,45E-13    |
| A_55_P2045136 | AK153212      | I830127L07Rik | 546643    | 1,041534976 | 6,75237963  | 1,87E-08    |
| A_51_P279062  | NM_027763     | Trem1         | 71326     | 1,038555644 | 12,29475    | 0,000114054 |
| A_55_P2025765 | NM_007403     | Adam8         | 11501     | 1,038495231 | 8,92762037  | 2,41E-06    |
| A_52_P467389  | NM_023044     | Slc15a3       | 65221     | 1,038395866 | 7,055611111 | 5,30E-17    |
| A_52_P84096   | NM_001081274  | Pgd           | 110208    | 1,038325119 | 9,041768519 | 7,82E-12    |
| A_55_P1981804 | NM_010326     | Gp1ba         | 14723     | 1,03567965  | 8,77625     | 7,95E-06    |
| A_51_P235687  | NM_009663     | Alox5ap       | 11690     | 1,035657393 | 11,89267593 | 5,29E-08    |
| A_51_P219789  | NM_010392     | H2-Q2         | 15013     | 1,034561208 | 12,34227778 | 3,44E-09    |
| A_51_P234864  | NM_178639     | Sfxn5         | 94282     | 1,034317965 | 7,237611111 | 3,24E-11    |
| A_51_P169693  | NM_198095     | Bst2          | 69550     | 1,032870429 | 8,143972222 | 1,17E-09    |
| A_55_P2060107 | NM_011099     | Pkm           | 18746     | 1,032744038 | 9,964944444 | 0,001775066 |
| A_52_P592909  | NM_026384     | Dgat2         | 67800     | 1,030937997 | 7,678148148 | 1,19E-07    |
| A_55_P2129354 | NM_153510     | Pilra         | 231805    | 1,030856121 | 8,450268519 | 1,08E-07    |
| A_51_P507801  | NM_028784     | F13a1         | 74145     | 1,027       | 10,18468519 | 3,88E-07    |
| A_55_P2095345 | NM_001177302  | Rara          | 19401     | 1,025741653 | 10,30317593 | 6,55E-07    |
| A_55_P1978506 | NM_207648     | H2-Q6         | 110557    | 1,025511129 | 11,26769444 | 3,13E-09    |
| A_55_P1962010 | NM_019985     | Clec1b        | 56760     | 1,024020668 | 10,84555556 | 1,23E-06    |
| A_55_P1979463 | NM_012021     | Prdx5         | 54683     | 1,021286963 | 9,774564815 | 5,24E-10    |
| A_51_P502456  | NR_004446     | H2-K2         | 630499    | 1,017825914 | 11,8260463  | 2,58E-06    |
| A_55_P2035320 | NM_017373     | Nfil3         | 18030     | 1,015885533 | 7,490981481 | 3,99E-13    |
| A_51_P203675  | NM_021407     | Trem3         | 58218     | 1,015116852 | 7,014601852 | 2,17E-16    |
| A_51_P515965  | NM_008685     | Nfe2          | 18022     | 1,014966614 | 10,84585185 | 3,63E-14    |
| A_51_P514085  | NM_013606     | Mx2           | 17858     | 1,014766296 | 7,163185185 | 0,00077785  |
| A_51_P193146  | NM_028595     | Ms4a6c        | 73656     | 1,013889507 | 8,116731481 | 2,91E-13    |
| A_66_P112006  | NM_010395     | H2-T10        | 15024     | 1,012026232 | 8,137101852 | 6,75E-17    |
| A_51_P390538  | NM_010821     | Mpeg1         | 17476     | 1,011847377 | 10,45868519 | 3,16E-06    |
| A_51_P237754  | NM_010398     | H2-T23        | 15040     | 1,011065978 | 12,45612037 | 1,38E-07    |
| A_66_P109986  | NM_0011111058 | Cd33          | 12489     | 1,009116057 | 7,018666667 | 2,03E-10    |
| A_55_P1992910 | NM_013755     | Gyg           | 27357     | 1,008505564 | 9,051777778 | 4,09E-10    |
| A_55_P2016049 | NM_001163014  | Gp6           | 243816    | 1,007170906 | 9,363157407 | 3,28E-07    |
| A_55_P1996973 | NM_029000     | Gvin1         | 74558     | 1,003458665 | 10,66923148 | 1,98E-06    |
| A_55_P1978511 | NM_010394     | H2-Q7         | 15018     | 1,001984102 | 11,90407407 | 1,01E-08    |
| A_51_P123625  | NM_008392     | Irg1          | 16365     | 1,001767886 | 6,630925926 | 5,38E-13    |
| A_51_P109449  | NM_008519     | Ltb4r1        | 16995     | 1,001305246 | 8,250814815 | 4,97E-12    |
| A_55_P2052834 | NM_010734     | Lst1          | 16988     | 0,996500795 | 11,34011111 | 7,50E-09    |
| A_55_P2025248 | NM_010751     | Mxd1          | 17119     | 0,99536725  | 11,07948148 | 4,15E-11    |
| A_51_P341465  | NM_009970     | Csf2ra        | 12982     | 0,994786963 | 9,477907407 | 5,82E-08    |
| A_52_P327664  | NM_153564     | Gbp5          | 229898    | 0,994209857 | 7,28162963  | 2,42E-10    |
| A_55_P1956827 | NM_031373     | Ogfr          | 72075     | 0,993714626 | 10,83173148 | 8,17E-15    |
| A_55_P2022585 | NM_011093     | Pira6         | 18729     | 0,990354531 | 9,66987037  | 3,75E-11    |
| A_55_P2100824 | XM_992161     | LOC676689     | 676689    | 0,986672496 | 11,38825926 | 5,90E-07    |
| A_55_P2012201 | NM_007471     | App           | 11820     | 0,984506359 | 7,750157407 | 1,22E-10    |
| A_51_P198434  | NM_001001892  | H2-K1         | 14972     | 0,983919714 | 12,90149074 | 6,49E-07    |

|               |              |               |        |             |             |             |
|---------------|--------------|---------------|--------|-------------|-------------|-------------|
| A_55_P1981494 | AY989854     | H2-BI         | 14963  | 0,982360095 | 8,753157407 | 1,26E-06    |
| A_51_P172853  | NM_009841    | Cd14          | 12475  | 0,981464229 | 7,309425926 | 8,45E-06    |
| A_55_P2030284 | NM_021406    | Trem1         | 58217  | 0,980297297 | 7,481185185 | 2,17E-10    |
| A_51_P425048  | NM_010392    | H2-Q2         | 15013  | 0,979962639 | 10,48325    | 2,19E-09    |
| A_51_P240019  | NM_013755    | Gyg           | 27357  | 0,979171701 | 9,095296296 | 5,52E-10    |
| A_55_P2049647 | NM_001001892 | H2-K1         | 14972  | 0,978884738 | 11,81080556 | 1,27E-08    |
| A_55_P2026233 | NM_023738    | Uba7          | 74153  | 0,977883943 | 11,4132963  | 5,03E-08    |
| A_66_P134453  | NM_001033780 | I830077J02Rik | 433638 | 0,977418919 | 7,598712963 | 2,44E-10    |
| A_55_P2142863 | NM_030253    | Parp9         | 80285  | 0,974939587 | 7,830425926 | 5,32E-17    |
| A_55_P2129348 | NM_153510    | Pilra         | 231805 | 0,971608108 | 7,477231481 | 1,37E-11    |
| A_55_P2038262 | NM_001164327 | Phf11b        | 236451 | 0,969234499 | 8,904546296 | 4,38E-09    |
| A_51_P389988  | NM_016917    | Slc40a1       | 53945  | 0,967573132 | 7,817731481 | 0,000174357 |
| A_55_P1962011 | NM_019985    | Clec1b        | 56760  | 0,964871224 | 12,4597037  | 8,90E-06    |
| A_52_P535484  | NM_029000    | Gvin1         | 74558  | 0,955281399 | 11,21257407 | 4,38E-09    |
| A_52_P408757  | NM_010188    | Fcgr3         | 14131  | 0,953613672 | 7,847166667 | 8,43E-13    |
| A_55_P2034300 | NM_001168256 | Tmem40        | 94346  | 0,951850556 | 12,09337037 | 4,29E-05    |
| A_51_P514712  | NM_001039530 | Parp14        | 547253 | 0,951285374 | 8,339453704 | 2,23E-10    |
| A_51_P146753  | NM_007781    | Csf2rb2       | 12984  | 0,948285374 | 8,364898148 | 7,95E-12    |
| A_55_P1992617 | NM_019985    | Clec1b        | 56760  | 0,948107313 | 12,17530556 | 4,91E-06    |
| A_51_P519251  | NM_019738    | Nupr1         | 56312  | 0,944411765 | 7,609685185 | 1,11E-08    |
| A_55_P2058942 | NM_026316    | Aldh3b1       | 67689  | 0,943701113 | 7,499462963 | 3,98E-10    |
| A_55_P2088401 | NM_010399    | H2-T9         | 15051  | 0,937108903 | 7,656916667 | 9,56E-10    |
| A_52_P207335  | NM_025944    | Tmem246       | 67063  | 0,934926073 | 8,164009259 | 0,000634524 |
| A_55_P1983448 | NM_011311    | S100a4        | 20198  | 0,934434022 | 10,34440741 | 7,80E-06    |
| A_51_P439996  | NM_008148    | Gp5           | 14729  | 0,934426073 | 8,655166667 | 1,21E-05    |
| A_55_P2019699 | NM_001139520 | Samhd1        | 56045  | 0,93431399  | 10,59947222 | 1,01E-09    |
| A_55_P2019601 | NM_033616    | Csprs         | 114564 | 0,933172496 | 8,109101852 | 1,95E-07    |
| A_55_P2105271 | NM_001114088 | Pdlim7        | 67399  | 0,931397456 | 9,595944444 | 1,62E-07    |
| A_51_P490795  | NM_010751    | Mxd1          | 17119  | 0,931295707 | 9,388462963 | 2,42E-10    |
| A_51_P498631  | NM_018769    | Dfna5         | 54722  | 0,930802862 | 7,197037037 | 2,06E-08    |
| A_55_P2034864 | NM_023716    | Tubb2b        | 73710  | 0,927459459 | 8,021981481 | 4,23E-05    |
| A_66_P114784  | NM_013737    | Pla2g7        | 27226  | 0,92550318  | 7,383935185 | 7,89E-11    |
| A_55_P2114938 | NM_001159417 | Irf9          | 16391  | 0,924895072 | 9,120018519 | 1,61E-13    |
| A_55_P2000062 | NM_008390    | Irf1          | 16362  | 0,922169316 | 10,14926852 | 2,06E-07    |
| A_51_P110301  | NM_009778    | C3            | 12266  | 0,920662957 | 8,568648148 | 9,28E-08    |
| A_55_P1999648 | NM_007408    | Plin2         | 11520  | 0,919897456 | 7,913064815 | 5,09E-11    |
| A_52_P266132  | NM_008013    | Fgl2          | 14190  | 0,915746423 | 7,75575     | 3,42E-07    |
| A_51_P202633  | NM_015766    | Ebi3          | 50498  | 0,914775835 | 7,957555556 | 2,29E-11    |
| A_52_P467449  | NM_007440    | Alox12        | 11684  | 0,91458903  | 10,98589815 | 8,67E-05    |
| A_51_P248666  | NM_021893    | Cd274         | 60533  | 0,914170111 | 7,620111111 | 3,89E-09    |
| A_55_P2066727 | NM_001164118 | Serpib6a      | 20719  | 0,907796502 | 10,67218519 | 0,051302984 |
| A_55_P1959818 | NM_001168256 | Tmem40        | 94346  | 0,905483307 | 11,87162963 | 7,20E-05    |
| A_55_P2169356 | AK156879     | Gm1966        | 434223 | 0,902224165 | 8,890925926 | 0,00016934  |
| A_51_P222657  | NM_009775    | Tspo          | 12257  | 0,901991256 | 10,63697222 | 2,36E-12    |
| A_55_P2009121 | NM_021604    | Agrn          | 11603  | 0,901964229 | 7,273453704 | 5,40E-11    |
| A_52_P661     | NM_175750    | Plxna4        | 243743 | 0,901828299 | 7,934537037 | 0,000131748 |
| A_51_P187082  | NM_008062    | G6pdx         | 14381  | 0,900439587 | 9,30237963  | 3,46E-12    |
| A_51_P156857  | NM_134133    | Smim3         | 106878 | 0,90022655  | 10,55702778 | 6,73E-05    |
| A_55_P1998416 | NM_008330    | Ifi47         | 15953  | 0,898506359 | 11,20523148 | 8,69E-10    |
| A_55_P2000107 | NM_009720    | Atox1         | 11927  | 0,891521463 | 12,43909259 | 0,000131043 |
| A_55_P2048912 | NM_001033308 | Themis2       | 230787 | 0,891068362 | 7,94637037  | 2,44E-12    |

|               |              |           |        |             |             |             |
|---------------|--------------|-----------|--------|-------------|-------------|-------------|
| A_52_P161488  | NM_019948    | Clec4e    | 56619  | 0,889790938 | 8,303083333 | 0,000307311 |
| A_66_P112305  | NM_053214    | Myo1f     | 17916  | 0,887928458 | 9,032777778 | 8,74E-08    |
| A_55_P2066116 | NM_033601    | Bcl3      | 12051  | 0,883978537 | 8,867453704 | 6,13E-10    |
| A_55_P1995092 | NM_010391    | H2-Q10    | 15007  | 0,88222655  | 8,931194444 | 1,77E-11    |
| A_55_P2016623 | XM_204772    | Gm5068    | 277089 | 0,881934817 | 8,429759259 | 2,51E-07    |
| A_51_P140321  | NM_026779    | Mocos     | 68591  | 0,87976868  | 7,033157407 | 8,39E-15    |
| A_55_P2125208 | NM_001172205 | Arid5a    | 214855 | 0,879463434 | 9,996212963 | 9,79E-08    |
| A_51_P186476  | NM_013612    | Slc11a1   | 18173  | 0,878012719 | 7,780277778 | 3,12E-10    |
| A_51_P384629  | NM_009983    | Ctsd      | 13033  | 0,876710652 | 11,38094444 | 9,85E-09    |
| A_51_P245989  | NM_009915    | Ccr2      | 12772  | 0,876306836 | 7,587314815 | 7,84E-08    |
| A_66_P119968  | NM_199311    | Clec4a1   | 269799 | 0,87613593  | 8,787638889 | 3,91E-08    |
| A_55_P2099560 | NM_031159    | Apobec1   | 11810  | 0,875677266 | 8,852648148 | 2,01E-08    |
| A_55_P2024461 | NM_198100    | Tbkbp1    | 73174  | 0,874940382 | 7,950731481 | 2,56E-11    |
| A_55_P2047768 | NM_148942    | Serpinc6  | 97848  | 0,874151828 | 10,10775    | 0,071452009 |
| A_55_P2063736 | NM_008147    | Gp49a     | 14727  | 0,872490461 | 6,785935185 | 1,02E-12    |
| A_55_P1962918 | NM_001033450 | Mnda      | 381308 | 0,872176471 | 6,741925926 | 0,001153843 |
| A_55_P2037343 | NM_010391    | H2-Q10    | 15007  | 0,871630366 | 8,227287037 | 0,023113425 |
| A_55_P2124273 | NM_053214    | Myo1f     | 17916  | 0,867613672 | 8,695740741 | 3,70E-08    |
| A_52_P425890  | NM_011407    | Sifn1     | 20555  | 0,8675469   | 7,431018519 | 1,49E-13    |
| A_55_P2003996 | NM_008207    | H2-T24    | 15042  | 0,865961844 | 8,357314815 | 2,87E-09    |
| A_51_P203182  | NM_138310    | Apobr     | 171504 | 0,863944356 | 7,357814815 | 6,15E-11    |
| A_52_P380369  | BC030186     | Phf11d    | 219132 | 0,861489666 | 7,197574074 | 4,86E-11    |
| A_55_P1966660 | NM_001025208 | LOC547349 | 547349 | 0,861468203 | 10,17682407 | 0,001840849 |
| A_55_P2106106 | NM_176912    | C5ar2     | 319430 | 0,861279014 | 7,158194444 | 4,13E-09    |
| A_55_P2027278 | NM_144560    | Gas2l1    | 78926  | 0,859494436 | 11,77264815 | 0,000674374 |
| A_55_P1986531 | NM_001191012 | G6b       | 106722 | 0,858918124 | 8,984194444 | 0,002100546 |
| A_51_P329928  | NM_013750    | Phlda3    | 27280  | 0,854691574 | 8,308592593 | 1,55E-05    |
| A_55_P2020128 | NM_011303    | Dhrs3     | 20148  | 0,853000795 | 10,11078704 | 3,90E-05    |
| A_51_P452629  | NM_011905    | Tlr2      | 24088  | 0,8519531   | 7,198657407 | 4,74E-10    |
| A_52_P507214  | NM_013599    | Mmp9      | 17395  | 0,85191256  | 6,87512963  | 1,52E-07    |
| A_55_P1972582 | XM_136331    | Gm4955    | 240921 | 0,849961844 | 7,062851852 | 1,27E-05    |
| A_55_P2052181 | NM_025534    | Ccdc82    | 66396  | 0,849526232 | 9,510259259 | 4,74E-10    |
| A_55_P2118037 | NM_007547    | Sirpa     | 19261  | 0,848983307 | 8,088916667 | 1,05E-08    |
| A_55_P2184189 | BC003730     | Ncf2      | 17970  | 0,844937202 | 8,99987963  | 6,76E-08    |
| A_52_P117393  | NM_011604    | Tlr6      | 21899  | 0,844154213 | 7,404166667 | 4,38E-09    |
| A_55_P1979341 | NM_007806    | Cyba      | 13057  | 0,843694754 | 11,73835185 | 7,42E-08    |
| A_55_P2016675 | NM_031373    | Ogfr      | 72075  | 0,840036566 | 8,509462963 | 7,57E-16    |
| A_51_P500082  | NM_001110517 | Gm14446   | 667373 | 0,83445151  | 7,193518519 | 1,76E-07    |
| A_51_P105520  | NM_153057    | Nomo1     | 211548 | 0,831631955 | 10,07852778 | 0,003904102 |
| A_51_P173100  | NM_145925    | Pttg1ip   | 108705 | 0,831003975 | 11,09700926 | 7,44E-05    |
| A_55_P2070869 | NM_008491    | Lcn2      | 16819  | 0,830580286 | 10,63827778 | 0,000923188 |
| A_51_P482711  | NM_053272    | Dhcr24    | 74754  | 0,830460254 | 10,31034259 | 5,38E-05    |
| A_51_P412835  | NM_007829    | Daxx      | 13163  | 0,829811606 | 9,660898148 | 3,07E-09    |
| A_52_P253004  | NM_022327    | Ralb      | 64143  | 0,829806836 | 8,354453704 | 4,42E-12    |
| A_51_P312437  | NM_025522    | Dhrs7     | 66375  | 0,829604134 | 9,247814815 | 5,25E-06    |
| A_51_P293688  | NM_026405    | Rab32     | 67844  | 0,82895787  | 7,472342593 | 4,51E-11    |
| A_55_P2139473 | NM_001161724 | Ilk       | 16202  | 0,828674086 | 10,57764815 | 1,40E-05    |
| A_51_P424499  | NM_011660    | Txn1      | 22166  | 0,82832194  | 9,936583333 | 2,19E-12    |
| A_55_P1978465 | NM_023124    | H2-Q8     | 15019  | 0,827598569 | 8,988675926 | 2,29E-10    |
| A_52_P8324    | NM_026516    | Tmem178   | 68027  | 0,827286169 | 6,916314815 | 9,01E-07    |
| A_55_P2192961 | NM_175648    | Trim30b   | 244183 | 0,827143084 | 6,812981481 | 4,74E-10    |

|               |              |               |           |             |             |             |
|---------------|--------------|---------------|-----------|-------------|-------------|-------------|
| A_52_P66371   | NM_178420    | NlrX1         | 270151    | 0,827033386 | 7,984259259 | 4,43E-06    |
| A_52_P135873  | XM_001475453 | Gm2744        | 100040381 | 0,82450159  | 9,115583333 | 0,000875863 |
| A_52_P604629  | NM_153287    | Csrnp1        | 215418    | 0,823748808 | 7,959185185 | 6,75E-10    |
| A_55_P2029574 | NM_008898    | Por           | 18984     | 0,822833863 | 8,714675926 | 2,97E-09    |
| A_55_P1965000 | NM_172689    | Ddx58         | 230073    | 0,822800477 | 8,992064815 | 3,28E-10    |
| A_55_P1962084 | NM_013549    | Hist2h2aa1    | 15267     | 0,822593005 | 12,61398148 | 4,06E-06    |
| A_51_P165330  | NM_025796    | Mrpl33        | 66845     | 0,821338633 | 10,59259259 | 8,71E-08    |
| A_55_P2181738 | NM_013590    | Lyz1          | 17110     | 0,819774245 | 12,10081481 | 4,76E-05    |
| A_55_P2076545 | NM_007976    | F5            | 14067     | 0,818621622 | 9,038907407 | 6,48E-05    |
| A_55_P2017636 | NM_011580    | Thbs1         | 21825     | 0,816430843 | 9,693759259 | 0,007617948 |
| A_55_P2004137 | NM_008138    | Gnai2         | 14678     | 0,814654213 | 12,3024537  | 6,12E-06    |
| A_55_P1978216 | NM_134158    | AF251705      | 140497    | 0,81377027  | 8,442583333 | 1,61E-06    |
| A_51_P293982  | NM_153119    | Plekho2       | 102595    | 0,810984897 | 7,763027778 | 5,34E-09    |
| A_51_P321150  | NM_017372    | Lyz2          | 17105     | 0,810922893 | 9,60375     | 9,46E-06    |
| A_55_P1988158 | NM_016903    | Esd           | 13885     | 0,810675676 | 11,24446296 | 0,000254075 |
| A_51_P448664  | NM_011539    | Tbxas1        | 21391     | 0,80936248  | 8,486592593 | 1,10E-06    |
| A_55_P2103055 | NM_010344    | Gsr           | 14782     | 0,809259936 | 8,490287037 | 0,000253726 |
| A_55_P2041075 | NM_001081636 | Ccnd3         | 12445     | 0,808991256 | 11,76825    | 7,21E-06    |
| A_55_P1953169 | NM_011315    | Saa3          | 20210     | 0,808631955 | 6,624268519 | 0,001480374 |
| A_55_P2006277 | NM_010956    | Ogdh          | 18293     | 0,803126391 | 9,116731481 | 2,19E-07    |
| A_55_P2022251 | NM_009878    | Cdkn2d        | 12581     | 0,80218283  | 10,00405556 | 1,29E-09    |
| A_55_P2019577 | NR_027818    | 1500011B03Rik | 66236     | 0,801628776 | 8,031675926 | 3,23E-05    |
| A_55_P2001218 | NM_009855    | Cd80          | 12519     | 0,795337043 | 8,23812963  | 2,03E-06    |
| A_51_P189361  | NM_027950    | Osgin1        | 71839     | 0,795259141 | 7,57487037  | 1,77E-11    |
| A_55_P2001920 | NM_010227    | Flna          | 192176    | 0,794259141 | 12,25918519 | 4,60E-05    |
| A_51_P423578  | NM_011408    | Slfn2         | 20556     | 0,792804452 | 8,79012963  | 3,88E-07    |
| A_55_P2024888 | NM_021281    | Ctss          | 13040     | 0,792676471 | 10,9524537  | 2,92E-05    |
| A_51_P358722  | NM_173414    | Lancl3        | 236285    | 0,792124801 | 6,974046296 | 0,000126056 |
| A_55_P1965150 | NM_021549    | Pnkp          | 59047     | 0,790755167 | 9,693166667 | 2,70E-07    |
| A_52_P195018  | NM_139206    | Arap3         | 106952    | 0,789329094 | 8,389277778 | 1,08E-08    |
| A_55_P1999349 | NM_027722    | Nudt4         | 71207     | 0,787515898 | 9,025564815 | 4,47E-07    |
| A_55_P1956973 | NM_011602    | Tln1          | 21894     | 0,786152623 | 11,65527778 | 0,0002855   |
| A_55_P2075200 | NM_023141    | Tor3a         | 30935     | 0,785984102 | 7,162074074 | 8,41E-07    |
| A_51_P428372  | NM_023785    | Ppbp          | 57349     | 0,785469793 | 13,15939815 | 0,000951795 |
| A_55_P1966843 | NR_002890    | Gm12070       | 654472    | 0,785327504 | 12,78138889 | 2,39E-07    |
| A_55_P1994032 | NM_013842    | Xbp1          | 22433     | 0,784781399 | 9,39325     | 9,13E-10    |
| A_55_P2066613 | NM_008879    | Lcp1          | 18826     | 0,783934022 | 8,950787037 | 1,53E-05    |
| A_55_P2106956 | NR_004447    | Gm5523        | 433273    | 0,783797297 | 12,7600463  | 1,41E-07    |
| A_51_P405397  | NM_007899    | Ecm1          | 13601     | 0,783395072 | 11,60706481 | 0,000427923 |
| A_55_P2186027 | NM_008084    | Gapdh         | 14433     | 0,783354531 | 12,90253704 | 1,51E-07    |
| A_55_P2013113 | NM_007523    | Bak1          | 12018     | 0,781475358 | 8,519425926 | 5,80E-11    |
| A_55_P2422164 | AI851140     | C130093G08Rik | 320032    | 0,780710652 | 6,990166667 | 2,37E-08    |
| A_55_P2045741 | NM_011815    | Fyb           | 23880     | 0,778432432 | 7,61237037  | 3,56E-06    |
| A_55_P2064996 | NM_009798    | Capzb         | 12345     | 0,77782035  | 9,313333333 | 8,73E-07    |
| A_55_P2021266 | NM_152803    | Hpse          | 15442     | 0,77754849  | 9,6035      | 1,80E-05    |
| A_52_P516021  | NM_011201    | Ptpn1         | 19246     | 0,77667806  | 8,320638889 | 1,29E-10    |
| A_55_P1990944 | NM_009807    | Casp1         | 12362     | 0,776040541 | 7,859231481 | 1,11E-10    |
| A_51_P463120  | NM_025760    | Ptplad2       | 66775     | 0,774533386 | 9,639787037 | 4,04E-05    |
| A_55_P2251181 | AK013795     | 2900076A13Rik | 73002     | 0,774465024 | 7,560416667 | 1,05E-08    |
| A_66_P136899  | NM_001159637 | Nadk          | 192185    | 0,774328299 | 8,396175926 | 1,17E-09    |
| A_55_P2133195 | NM_001033767 | Gm4951        | 240327    | 0,773286169 | 6,547814815 | 9,95E-06    |



|               |              |               |           |             |             |             |
|---------------|--------------|---------------|-----------|-------------|-------------|-------------|
| A_55_P2058757 | NM_007598    | Cap1          | 12331     | 0,773172496 | 10,52847222 | 1,72E-06    |
| A_55_P1994939 | NM_008252    | Hmgb2         | 97165     | 0,772825914 | 9,225175926 | 2,05E-06    |
| A_51_P208240  | NM_019418    | Tnfsf14       | 50930     | 0,772350556 | 7,39587963  | 2,60E-07    |
| A_55_P2243431 | BC052902     | Gdap10        | 100504486 | 0,771848172 | 7,355064815 | 2,23E-08    |
| A_55_P1971074 | NM_015804    | Atp11a        | 50770     | 0,771419714 | 7,035888889 | 2,30E-07    |
| A_51_P256202  | NM_022325    | Ctsz          | 64138     | 0,770535771 | 10,44901852 | 1,44E-08    |
| A_55_P2090617 | NM_153510    | Pilra         | 231805    | 0,770171701 | 7,239092593 | 2,71E-08    |
| A_55_P2044653 | NM_009999    | Cyp2b10       | 13088     | 0,768719396 | 7,743509259 | 0,001180721 |
| A_51_P343252  | NM_009842    | Cd151         | 12476     | 0,7683593   | 10,1862037  | 0,000115259 |
| A_52_P196105  | NM_175274    | Ttyh3         | 78339     | 0,767658188 | 9,01687037  | 1,21E-05    |
| A_51_P369803  | NM_013585    | Psmb9         | 16912     | 0,765824324 | 9,379231481 | 2,99E-07    |
| A_52_P681310  | NM_011113    | Plaur         | 18793     | 0,765606518 | 8,350435185 | 1,66E-06    |
| A_55_P2086811 | NM_001013817 | Sp140         | 434484    | 0,763647059 | 8,052092593 | 1,76E-07    |
| A_55_P1957413 | NM_019391    | Lsp1          | 16985     | 0,762348172 | 13,13555556 | 8,15E-05    |
| A_55_P1990785 | NM_027678    | Zranb3        | 226409    | 0,762348172 | 7,552055556 | 0,000643623 |
| A_51_P247249  | NM_009662    | Alox5         | 11689     | 0,76200159  | 7,785259259 | 6,01E-07    |
| A_55_P2139385 | NR_002890    | Gm12070       | 654472    | 0,761525437 | 11,84163889 | 1,56E-08    |
| A_55_P2033120 | NM_029688    | Srxn1         | 76650     | 0,761445151 | 10,16190741 | 0,000468879 |
| A_66_P121787  | NM_010156    | Samd9l        | 209086    | 0,761221781 | 8,901342593 | 3,22E-05    |
| A_51_P381558  | NM_133914    | Rasa4         | 54153     | 0,759670111 | 7,07225     | 3,53E-10    |
| A_55_P2004511 | NM_001169153 | Cd300lf       | 246746    | 0,759423688 | 8,190787037 | 5,02E-06    |
| A_52_P220879  | NM_009373    | Tgm2          | 21817     | 0,757973768 | 7,487675926 | 1,24E-10    |
| A_52_P126266  | NM_182997    | Prkab2        | 108097    | 0,754452305 | 7,897527778 | 3,14E-06    |
| A_55_P2072631 | NM_001083810 | Prr5l         | 72446     | 0,753208267 | 7,089351852 | 6,85E-18    |
| A_55_P2168667 | NM_028030    | Rbpms2        | 71973     | 0,751612878 | 9,199935185 | 0,002959954 |
| A_55_P2090798 | NM_001005863 | Mtus1         | 102103    | 0,751248808 | 6,671009259 | 9,80E-09    |
| A_51_P327796  | NM_010580    | Itgb5         | 16419     | 0,750742448 | 9,999074074 | 0,070325731 |
| A_52_P463977  | NM_197986    | Tmem140       | 68487     | 0,750554054 | 10,68826852 | 0,000233987 |
| A_52_P86693   | NM_026790    | Ifi27         | 52668     | 0,749246423 | 11,49366667 | 0,001258234 |
| A_52_P84901   | NM_133891    | Slc44a1       | 100434    | 0,749056439 | 8,460712963 | 0,001129028 |
| A_51_P370678  | NM_008114    | Gfi1b         | 14582     | 0,74827345  | 7,846       | 0,000307803 |
| A_52_P409769  | NM_194464    | Mrv1          | 17540     | 0,748120827 | 8,877777778 | 0,003002363 |
| A_55_P1984243 | NM_010872    | Naip2         | 17948     | 0,747255962 | 7,172685185 | 1,42E-14    |
| A_55_P1989321 | NM_009121    | Sat1          | 20229     | 0,745868045 | 9,123851852 | 7,64E-09    |
| A_55_P2151601 | NM_010156    | Samd9l        | 209086    | 0,745381558 | 9,462018519 | 9,16E-05    |
| A_55_P1995195 | NM_008037    | Fosl2         | 14284     | 0,744502385 | 7,347592593 | 4,45E-08    |
| A_66_P116252  | NM_130447    | Dusp16        | 70686     | 0,743300477 | 7,518592593 | 5,83E-07    |
| A_51_P225592  | NM_001001491 | Tpm4          | 326618    | 0,742470588 | 11,62825926 | 7,50E-05    |
| A_55_P2149363 | NM_172286    | 6430548M08Rik | 234797    | 0,742375994 | 8,304694444 | 1,52E-05    |
| A_55_P1990235 | NM_021328    | Bin3          | 57784     | 0,742360095 | 9,066212963 | 6,15E-11    |
| A_52_P586004  | NM_001033245 | Hk3           | 212032    | 0,741038951 | 6,869101852 | 7,47E-13    |
| A_55_P2066827 | NM_027658    | Hexim2        | 71059     | 0,740643084 | 7,166212963 | 3,99E-05    |
| A_52_P431615  | XM_001000891 | Gm1966        | 434223    | 0,740290143 | 8,487324074 | 1,12E-10    |
| A_55_P2172852 | NM_025760    | Ptplad2       | 66775     | 0,7399531   | 8,653916667 | 7,42E-05    |
| A_55_P1986296 | NM_178598    | Tagln2        | 21346     | 0,73991097  | 13,78324074 | 0,000320753 |
| A_55_P1970597 | NM_009609    | Actg1         | 11465     | 0,739275835 | 14,70530556 | 0,000418579 |
| A_55_P2055819 | NM_001037722 | Adam15        | 11490     | 0,738936407 | 8,749925926 | 5,19E-06    |
| A_51_P407323  | NM_007976    | F5            | 14067     | 0,738445946 | 7,896972222 | 0,000423841 |
| A_55_P1982668 | NM_001159637 | Nadk          | 192185    | 0,737872019 | 8,584490741 | 1,15E-07    |
| A_51_P400543  | NM_019467    | Aif1          | 11629     | 0,732963434 | 7,067833333 | 3,88E-07    |
| A_55_P2007001 | NM_023465    | Ctnnbip1      | 67087     | 0,73232035  | 6,655657407 | 3,39E-07    |

|               |              |               |        |             |             |             |
|---------------|--------------|---------------|--------|-------------|-------------|-------------|
| A_52_P633410  | NM_020590    | Gabarapl1     | 57436  | 0,731555644 | 11,60639815 | 0,001077527 |
| A_55_P1966982 | NM_010344    | Gsr           | 14782  | 0,731031797 | 10,30383333 | 0,001318903 |
| A_55_P2043837 | NM_028791    | Cmtr1         | 74157  | 0,729103339 | 10,35912963 | 1,26E-12    |
| A_51_P408363  | NM_008823    | Cfp           | 18636  | 0,728244833 | 8,62962963  | 3,82E-05    |
| A_55_P2111264 | NM_001025565 | Lhx9          | 16876  | 0,725802862 | 6,742074074 | 2,97E-07    |
| A_55_P1955656 | NM_007796    | Ctla2a        | 13024  | 0,72549841  | 15,5409537  | 5,39E-05    |
| A_51_P450100  | NM_026124    | 1110008F13Rik | 67388  | 0,72540461  | 9,614712963 | 2,58E-10    |
| A_55_P2081133 | NM_008084    | Gapdh         | 14433  | 0,725326709 | 11,4069537  | 5,83E-07    |
| A_55_P2158404 | NM_020557    | Cmpk2         | 22169  | 0,724976153 | 6,532537037 | 6,21E-11    |
| A_55_P2183597 | NM_198664    | Tbc1d2        | 381605 | 0,724487281 | 6,877231481 | 5,51E-08    |
| A_51_P238448  | NM_007632    | Ccnd3         | 12445  | 0,72340779  | 9,886638889 | 4,00E-06    |
| A_51_P381260  | NM_008761    | Fxyd5         | 18301  | 0,721424483 | 11,63407407 | 0,000154076 |
| A_51_P243914  | NM_018773    | Skap2         | 54353  | 0,72140779  | 9,947768519 | 8,58E-07    |
| A_52_P354744  | NM_011401    | Slc2a3        | 20527  | 0,719881558 | 10,2760463  | 0,000350572 |
| A_51_P258690  | NM_009136    | Scrg1         | 20284  | 0,719824324 | 6,510712963 | 6,03E-06    |
| A_55_P2037425 | NM_008084    | Gapdh         | 14433  | 0,718060413 | 11,66209259 | 7,54E-07    |
| A_55_P2066778 | NM_206536    | AB124611      | 382062 | 0,717296502 | 8,022657407 | 6,35E-09    |
| A_55_P2071858 | NM_008598    | Mgmt          | 17314  | 0,716413355 | 7,548111111 | 4,79E-05    |
| A_66_P126159  | NM_001080971 | Tubb1         | 545486 | 0,715220191 | 8,388175926 | 0,00064513  |
| A_51_P144868  | NM_029934    | Mboat7        | 77582  | 0,713553259 | 8,691592593 | 4,39E-08    |
| A_55_P1980831 | NM_029711    | Arpc2         | 76709  | 0,711838633 | 12,91356481 | 4,69E-05    |
| A_51_P341746  | NM_010823    | Mpl           | 17480  | 0,710106518 | 9,446907407 | 0,001192703 |
| A_51_P430900  | NM_013642    | Dusp1         | 19252  | 0,709298887 | 8,085148148 | 0,000420899 |
| A_55_P2075195 | NM_025422    | Cd302         | 66205  | 0,707372019 | 6,731592593 | 9,15E-10    |
| A_51_P488739  | NM_030701    | Hcar2         | 80885  | 0,707000795 | 6,76075     | 1,84E-13    |
| A_55_P1957954 | NM_009105    | Rsu1          | 20163  | 0,705168521 | 9,101259259 | 0,000123106 |
| A_51_P455807  | NM_133838    | Ehd4          | 98878  | 0,705023052 | 10,5294537  | 3,05E-07    |
| A_55_P2015670 | NM_008397    | Itga6         | 16403  | 0,704330684 | 12,40418519 | 0,007170061 |
| A_55_P2056973 | NM_001033405 | Trem12        | 328833 | 0,704006359 | 8,990962963 | 9,24E-05    |
| A_52_P38639   | NM_153795    | Fermt3        | 108101 | 0,703262321 | 9,05762963  | 0,000315498 |
| A_51_P111164  | NM_172612    | Rnd1          | 223881 | 0,702697933 | 7,253537037 | 6,00E-06    |
| A_55_P2133248 | AK134184     | Gm8995        | 668139 | 0,702538156 | 8,452398148 | 5,90E-07    |
| A_51_P374900  | NM_028808    | P2ry13        | 74191  | 0,702449921 | 6,596925926 | 7,71E-11    |
| A_51_P191463  | AY302216     | H2-M2         | 14990  | 0,702097774 | 10,41486111 | 1,57E-07    |
| A_51_P458866  | NM_172647    | F11r          | 16456  | 0,701539746 | 7,816861111 | 0,000139854 |
| A_55_P1963868 | NM_153119    | Plekho2       | 102595 | 0,700100954 | 11,31878704 | 3,76E-08    |
| A_52_P159050  | BC059776     | Cds2          | 110911 | 0,700052464 | 7,524518519 | 0,01492015  |
| A_55_P1952166 | NM_007880    | Arid3a        | 13496  | 0,700036566 | 8,214537037 | 1,71E-09    |
| A_55_P2085295 | NM_198411    | Inf2          | 70435  | 0,698254372 | 10,06146296 | 0,000347049 |
| A_55_P2102126 | NM_001017959 | Lamp2         | 16784  | 0,695188394 | 8,590509259 | 2,99E-07    |
| A_55_P1996862 | NM_011190    | Psme2         | 19188  | 0,695166932 | 11,75825926 | 3,88E-07    |
| A_51_P464023  | NM_021528    | Chst12        | 59031  | 0,691531002 | 7,815944444 | 2,33E-05    |
| A_51_P392687  | NM_011701    | Vim           | 22352  | 0,690555644 | 10,62230556 | 0,00043753  |
| A_52_P483280  | NM_010685    | Lamp2         | 16784  | 0,688441971 | 7,947592593 | 3,02E-09    |
| A_55_P2052769 | NM_001042743 | Mast2         | 17776  | 0,687534976 | 9,082824074 | 0,000898059 |
| A_55_P2083121 | NM_001164567 | Vill          | 22351  | 0,68741256  | 7,458916667 | 0,003664353 |
| A_55_P1983450 | NM_011311    | S100a4        | 20198  | 0,687197933 | 9,767916667 | 1,21E-05    |
| A_51_P279606  | NM_009896    | Socs1         | 12703  | 0,686680445 | 7,461444444 | 2,57E-09    |
| A_51_P387235  | NM_021524    | Nampt         | 59027  | 0,686426073 | 6,882240741 | 1,59E-12    |
| A_51_P377452  | NM_008677    | Ncf4          | 17972  | 0,684333068 | 11,8549537  | 3,04E-05    |
| A_51_P120717  | NM_010721    | Lmnb1         | 16906  | 0,683875199 | 7,258287037 | 3,73E-09    |

|               |              |               |           |             |             |             |
|---------------|--------------|---------------|-----------|-------------|-------------|-------------|
| A_55_P2060966 | NM_001163440 | Mov10         | 17454     | 0,682843402 | 8,540138889 | 5,97E-08    |
| A_51_P489522  | NM_007797    | Ctla2b        | 13025     | 0,682384738 | 14,83314815 | 6,56E-05    |
| A_51_P414889  | NM_027320    | Ifi35         | 70110     | 0,682378378 | 7,926555556 | 2,44E-10    |
| A_55_P1966659 | NM_001025208 | LOC547349     | 547349    | 0,681976153 | 8,173574074 | 1,05E-06    |
| A_55_P2088425 | NM_015749    | Tcn2          | 21452     | 0,681416534 | 8,187425926 | 6,69E-07    |
| A_66_P138137  | NM_013632    | Pnp           | 18950     | 0,681191574 | 8,288712963 | 1,93E-07    |
| A_52_P476754  | NM_176860    | Ubash3b       | 72828     | 0,680378378 | 9,304685185 | 0,000180388 |
| A_51_P173622  | NM_011202    | Ptpn11        | 19247     | 0,680176471 | 10,46587037 | 0,000407581 |
| A_55_P1966194 | NM_019549    | Plek          | 56193     | 0,679790143 | 11,53537037 | 0,000357856 |
| A_52_P282741  | NM_011520    | Sdc3          | 20970     | 0,679771065 | 6,544092593 | 5,52E-09    |
| A_51_P460954  | NM_009139    | Ccl6          | 20305     | 0,678856121 | 11,12508333 | 0,000746876 |
| A_51_P463846  | NM_145545    | Gbp7          | 229900    | 0,678447536 | 7,459509259 | 0,001267173 |
| A_55_P2048176 | XM_001475694 | Gm3224        | 100041238 | 0,678444356 | 6,952712963 | 1,76E-05    |
| A_55_P2037662 | NM_144921    | Atp1a3        | 232975    | 0,678401431 | 7,536712963 | 4,26E-08    |
| A_55_P2064652 | NM_001146007 | Trim12c       | 319236    | 0,677742448 | 6,678055556 | 9,63E-10    |
| A_55_P1967330 | NR_003623    | Gm5069        | 277333    | 0,677724165 | 9,873601852 | 1,21E-07    |
| A_55_P2166985 | NM_207677    | Dedd2         | 67379     | 0,677420509 | 10,24730556 | 1,53E-08    |
| A_52_P1197913 | NM_008655    | Gadd45b       | 17873     | 0,677096979 | 7,602907407 | 2,92E-10    |
| A_55_P2114993 | NM_009609    | Actg1         | 11465     | 0,676769475 | 14,44538889 | 0,000528072 |
| A_55_P2007768 | NR_033633    | Gm8709        | 667572    | 0,676185215 | 11,20519444 | 1,38E-06    |
| A_51_P201480  | NM_213659    | Stat3         | 20848     | 0,675352941 | 9,488388889 | 7,43E-05    |
| A_55_P1987264 | NM_010312    | Gnb2          | 14693     | 0,674875199 | 11,07212037 | 1,84E-05    |
| A_55_P1965194 | NM_178729    | Fbxl5         | 242960    | 0,674786963 | 6,744148148 | 8,18E-09    |
| A_55_P1989772 | NM_021507    | Sqrdl         | 59010     | 0,674662957 | 7,579592593 | 1,26E-10    |
| A_55_P1995074 | NM_176902    | Ubald2        | 319370    | 0,673796502 | 11,53085185 | 7,80E-12    |
| A_55_P2038007 | NM_007791    | Csrp1         | 13007     | 0,673124006 | 10,81168519 | 0,000951795 |
| A_51_P146044  | NM_144819    | Ccdc92        | 215707    | 0,673015103 | 9,708287037 | 0,052684205 |
| A_51_P451052  | NM_175013    | Pgm5          | 226041    | 0,672483307 | 6,775481481 | 5,66E-08    |
| A_55_P2151986 | NM_001038664 | Gngt2         | 14710     | 0,670657393 | 9,464083333 | 2,00E-05    |
| A_55_P2099650 | NM_053195    | Slc24a3       | 94249     | 0,669932432 | 9,381527778 | 0,0022381   |
| A_55_P2051322 | NM_025994    | Efhd2         | 27984     | 0,669918124 | 8,214694444 | 1,07E-07    |
| A_51_P252677  | NM_026738    | 1110007C09Rik | 68480     | 0,669735294 | 10,53015741 | 3,37E-06    |
| A_55_P1981959 | NM_001163470 | Trafd1        | 231712    | 0,667267091 | 11,44040741 | 3,34E-10    |
| A_51_P330428  | NM_007918    | Eif4ebp1      | 13685     | 0,667236089 | 10,03876852 | 2,18E-06    |
| A_55_P2112737 | NM_007393    | Actb          | 11461     | 0,665301272 | 16,18647222 | 0,001663403 |
| A_55_P2000548 | NM_007687    | Cfl1          | 12631     | 0,664399046 | 12,52064815 | 8,98E-06    |
| A_51_P306527  | NM_011738    | Ywhah         | 22629     | 0,663267091 | 12,94266667 | 0,003090763 |
| A_66_P113059  | NM_010578    | Itgb1         | 16412     | 0,662255167 | 8,41912037  | 1,52E-05    |
| A_51_P147274  | NM_153197    | Clec4a3       | 73149     | 0,661699523 | 7,216092593 | 2,93E-05    |
| A_55_P1955747 | NR_002890    | Gm12070       | 654472    | 0,661372814 | 11,52489815 | 2,33E-07    |
| A_51_P222475  | NM_053252    | Ehbp1l1       | 114601    | 0,659647059 | 8,317333333 | 3,43E-14    |
| A_55_P1961188 | NR_023357    | Gm6981        | 629557    | 0,658402226 | 9,767333333 | 5,53E-07    |
| A_51_P312485  | NM_013521    | Fpr1          | 14293     | 0,657801272 | 8,386333333 | 0,000111148 |
| A_55_P2163857 | NM_001146007 | Trim12c       | 319236    | 0,65749841  | 7,372361111 | 1,89E-07    |
| A_55_P2124097 | NR_023357    | Gm6981        | 629557    | 0,656462639 | 10,60459259 | 5,62E-07    |
| A_55_P1975714 | NM_001160018 | Tor1aip1      | 208263    | 0,655851351 | 8,01287963  | 4,74E-14    |
| A_55_P2172470 | NM_022029    | Nrgn          | 64011     | 0,655387917 | 11,42794444 | 0,001322619 |
| A_52_P127362  | NM_029478    | Vmp1          | 75909     | 0,65522973  | 9,248453704 | 0,001156244 |
| A_52_P559919  | NM_011163    | Eif2ak2       | 19106     | 0,654197933 | 6,528305556 | 4,35E-16    |
| A_55_P2149763 | NM_001025313 | Tapbp         | 21356     | 0,653983307 | 9,568805556 | 8,18E-09    |
| A_66_P105689  | NM_030684    | Trim34a       | 94094     | 0,653703498 | 7,264731481 | 0,003742019 |

|               |              |               |           |             |             |             |
|---------------|--------------|---------------|-----------|-------------|-------------|-------------|
| A_51_P427663  | NM_007725    | Cnn2          | 12798     | 0,653544515 | 10,90341667 | 0,000401774 |
| A_51_P308590  | NM_134084    | Ppif          | 105675    | 0,653387122 | 7,10575     | 3,93E-06    |
| A_55_P2102240 | NM_181569    | Nprl3         | 17168     | 0,651091415 | 8,230324074 | 4,05E-07    |
| A_52_P374897  | NM_009705    | Arg2          | 11847     | 0,65036725  | 6,545092593 | 3,65E-10    |
| A_55_P2107696 | NM_205821    | Mrgpra6       | 381886    | 0,649916534 | 6,522342593 | 6,52E-08    |
| A_55_P2017759 | NM_001033711 | Evi2a         | 14017     | 0,649420509 | 7,86112037  | 1,92E-07    |
| A_51_P131358  | NM_009151    | Selplg        | 20345     | 0,648932432 | 10,73363889 | 5,38E-05    |
| A_51_P419246  | NR_028427    | 5830416P10Rik | 381232    | 0,648489666 | 8,18162963  | 0,000891573 |
| A_55_P1989748 | XM_001476309 | Gm3051        | 100040936 | 0,648277424 | 6,977101852 | 1,86E-05    |
| A_55_P2046852 | NM_008089    | Gata1         | 14460     | 0,648005564 | 9,688268519 | 6,04E-06    |
| A_51_P131800  | NM_007806    | Cyba          | 13057     | 0,647864865 | 9,063907407 | 1,20E-08    |
| A_55_P2095342 | NM_001177302 | Rara          | 19401     | 0,647717806 | 8,163953704 | 1,39E-06    |
| A_51_P472249  | NM_011405    | Slc7a7        | 20540     | 0,647430048 | 7,558638889 | 1,21E-10    |
| A_55_P1961690 | NM_025329    | Tctex1d2      | 66061     | 0,647257552 | 6,941814815 | 1,99E-06    |
| A_55_P2007022 | NM_011925    | Cd97          | 26364     | 0,646765501 | 12,10471296 | 0,00097985  |
| A_52_P99411   | NM_008410    | Itm2b         | 16432     | 0,646018283 | 11,63208333 | 2,19E-12    |
| A_52_P215106  | NM_001004435 | Pik3r6        | 104709    | 0,645603339 | 7,751416667 | 1,53E-09    |
| A_55_P2035509 | NM_175026    | Pyhin1        | 236312    | 0,645462639 | 8,288055556 | 0,000175199 |
| A_52_P489202  | AK169506     | 4732465J04Rik | 414105    | 0,645324324 | 6,756666667 | 1,51E-08    |
| A_51_P238722  | NM_010740    | Cd93          | 17064     | 0,644947536 | 8,298055556 | 0,000194669 |
| A_55_P2181222 | NM_001162938 | Pydc3         | 100033459 | 0,644755962 | 7,531953704 | 0,016318923 |
| A_55_P2104572 | NM_144905    | 6330416G13Rik | 230279    | 0,644356916 | 7,190768519 | 1,70E-06    |
| A_55_P2059342 | NM_010684    | Lamp1         | 16783     | 0,643747218 | 11,8472037  | 1,82E-07    |
| A_55_P1984284 | NM_008084    | Gapdh         | 14433     | 0,642964229 | 11,14699074 | 2,58E-06    |
| A_52_P161495  | NM_009744    | Bcl6          | 12053     | 0,642605723 | 8,821333333 | 7,27E-06    |
| A_55_P2176729 | NM_007453    | Prdx6         | 11758     | 0,642482512 | 10,89010185 | 0,000107364 |
| A_55_P1952882 | AF233647     | Cyp4f18       | 72054     | 0,641027027 | 10,98222222 | 0,000334971 |
| A_52_P56751   | NM_008879    | Lcp1          | 18826     | 0,640393482 | 10,01043519 | 0,000614439 |
| A_52_P355084  | NM_144797    | Metrn1        | 210029    | 0,639885533 | 7,852851852 | 6,41E-07    |
| A_51_P257550  | NM_010807    | Marcks1       | 17357     | 0,639277424 | 7,062435185 | 5,09E-09    |
| A_55_P2134790 | NM_001024945 | Qsox1         | 104009    | 0,639180445 | 9,475898148 | 4,28E-06    |
| A_55_P2035613 | NM_027154    | Tmbim1        | 69660     | 0,638615262 | 7,629481481 | 0,005364669 |
| A_52_P93933   | NM_008562    | Mcl1          | 17210     | 0,637007949 | 8,620203704 | 7,98E-05    |
| A_51_P242201  | NM_025972    | Naaa          | 67111     | 0,636697138 | 7,513990741 | 8,87E-07    |
| A_55_P2042183 | XM_001476516 | Gm3181        | 100041175 | 0,636492846 | 6,895203704 | 3,30E-05    |
| A_55_P2052799 | NM_009806    | Cask          | 12361     | 0,635860095 | 6,842240741 | 8,81E-09    |
| A_51_P111259  | NM_026373    | Cdk2ap2       | 52004     | 0,633669316 | 9,939592593 | 9,84E-05    |
| A_51_P354077  | NM_153153    | Svil          | 225115    | 0,633504769 | 7,720009259 | 8,02E-07    |
| A_55_P2005552 | NM_172415    | Arhgef10l     | 72754     | 0,631897456 | 7,420231481 | 2,44E-06    |
| A_51_P279100  | NM_008969    | Ptgs1         | 19224     | 0,631895072 | 8,957759259 | 0,007170061 |
| A_55_P2094925 | NM_011157    | Srgn          | 19073     | 0,631411765 | 12,97172222 | 1,08E-05    |
| A_55_P2099961 | NM_178186    | Hist1h2ag     | 319167    | 0,631091415 | 12,70462037 | 1,55E-05    |
| A_55_P2067362 | AK171155     | Dpep2         | 319446    | 0,628943561 | 6,568972222 | 5,25E-06    |
| A_55_P2106690 | NM_011527    | Tal1          | 21349     | 0,628881558 | 8,784694444 | 0,000493075 |
| A_51_P309158  | NM_027840    | Snx20         | 71607     | 0,62877027  | 10,35032407 | 1,30E-05    |
| A_55_P2020378 | NM_133838    | Ehd4          | 98878     | 0,628290143 | 7,397583333 | 8,45E-09    |
| A_52_P591153  | NM_178911    | Pld4          | 104759    | 0,628243243 | 7,923962963 | 1,33E-06    |
| A_52_P179068  | NM_017469    | Gucy1b3       | 54195     | 0,626753577 | 7,648648148 | 0,000212318 |
| A_52_P317393  | NM_018882    | Gpr56         | 14766     | 0,626327504 | 8,471944444 | 0,005284327 |
| A_55_P2083411 | NM_024444    | Cyp4f18       | 72054     | 0,625950715 | 10,70783333 | 0,001325323 |
| A_55_P2090880 | NM_001145827 | Stk40         | 74178     | 0,623603339 | 9,673342593 | 9,83E-08    |

|               |              |               |        |             |             |             |
|---------------|--------------|---------------|--------|-------------|-------------|-------------|
| A_55_P2068607 | NM_029219    | Rnf19b        | 75234  | 0,623445151 | 9,236851852 | 1,04E-06    |
| A_51_P328652  | NM_133348    | Acot7         | 70025  | 0,623396661 | 9,069583333 | 2,82E-07    |
| A_55_P2117741 | NM_010879    | Nck2          | 17974  | 0,622286963 | 9,471175926 | 0,000559997 |
| A_52_P570266  | NM_013640    | Psmb10        | 19171  | 0,622215421 | 10,45750926 | 0,000366427 |
| A_52_P12806   | NR_003623    | Gm5069        | 277333 | 0,621694754 | 10,84724074 | 4,57E-08    |
| A_55_P2136832 | NR_023357    | Gm6981        | 629557 | 0,621627186 | 11,03919444 | 5,80E-07    |
| A_51_P291460  | NR_003630    | Gm6498        | 624367 | 0,62136089  | 10,71912963 | 2,64E-07    |
| A_52_P508089  | NM_011179    | Psap          | 19156  | 0,620753577 | 10,01703704 | 0,000208463 |
| A_55_P1954021 | NM_016741    | Scarb1        | 20778  | 0,619329094 | 7,129296296 | 1,55E-07    |
| A_55_P2007196 | NM_001177307 | Aldoa         | 11674  | 0,618527822 | 12,81962963 | 7,14E-07    |
| A_55_P2139341 | NM_001008427 | Gm5595        | 434179 | 0,616878378 | 9,220175926 | 0,00057415  |
| A_51_P234113  | NM_172729    | Nod1          | 107607 | 0,616868045 | 8,864962963 | 5,48E-08    |
| A_51_P341918  | NM_009366    | Tsc22d1       | 21807  | 0,616036566 | 12,52748148 | 0,016370591 |
| A_52_P616392  | NM_183426    | Sbno2         | 216161 | 0,615651033 | 6,858305556 | 5,21E-12    |
| A_55_P2152009 | NM_021344    | Tesc          | 57816  | 0,615394277 | 9,99912963  | 0,019519464 |
| A_55_P2028600 | NM_022410    | Myh9          | 17886  | 0,612947536 | 12,06612963 | 0,000408472 |
| A_55_P2142830 | NM_013610    | Ninj1         | 18081  | 0,612779014 | 11,74842593 | 0,000511212 |
| A_65_P19784   | NM_080443    | Asb7          | 117589 | 0,612639905 | 6,939712963 | 7,34E-07    |
| A_51_P494675  | NM_028071    | Cotl1         | 72042  | 0,612398251 | 12,01169444 | 0,000421192 |
| A_55_P2136501 | NM_021565    | Midn          | 59090  | 0,611624801 | 8,92987037  | 3,60E-06    |
| A_51_P191469  | NM_194346    | Rnf31         | 268749 | 0,6114531   | 8,10537037  | 2,87E-09    |
| A_66_P136788  | NM_176902    | Ubal2         | 319370 | 0,611203498 | 10,71011111 | 6,27E-10    |
| A_55_P2030030 | NM_007421    | Adssl1        | 11565  | 0,61118601  | 7,980481481 | 0,000433243 |
| A_55_P1992099 | NM_008982    | Ptprj         | 19271  | 0,611124006 | 8,732703704 | 0,000317477 |
| A_55_P1987201 | NM_009794    | Capn2         | 12334  | 0,610240859 | 9,118657407 | 1,19E-06    |
| A_51_P479786  | NM_013870    | Smtn          | 29856  | 0,610212242 | 6,857490741 | 5,81E-06    |
| A_52_P370203  | NM_021878    | Jarid2        | 16468  | 0,60986407  | 8,271046296 | 0,000207336 |
| A_51_P467751  | NM_029884    | Hgsnat        | 52120  | 0,609758347 | 7,766444444 | 8,96E-05    |
| A_51_P357573  | NM_145575    | Cald1         | 109624 | 0,609306836 | 7,30687037  | 0,00148057  |
| A_55_P1956160 | NM_001081032 | Gm8909        | 667977 | 0,607980922 | 7,244814815 | 0,054631964 |
| A_51_P214747  | NM_172893    | Parp12        | 243771 | 0,60718601  | 6,493740741 | 5,79E-14    |
| A_51_P227392  | NM_133955    | Rhou          | 69581  | 0,605856121 | 6,411064815 | 2,78E-12    |
| A_51_P332201  | NM_009976    | Cst3          | 13010  | 0,605508744 | 11,99844444 | 0,000396507 |
| A_52_P515247  | NM_007486    | Arhgdib       | 11857  | 0,605476153 | 12,99865741 | 0,00017093  |
| A_51_P162437  | NM_001081412 | Bcr           | 110279 | 0,604387122 | 8,680175926 | 0,001437178 |
| A_55_P1997275 | NM_133216    | Xpnpep1       | 170750 | 0,604377583 | 9,249287037 | 0,00042135  |
| A_55_P2137203 | NM_020579    | B4galt3       | 57370  | 0,602494436 | 8,575055556 | 1,83E-05    |
| A_51_P267239  | NM_019980    | Litaf         | 56722  | 0,602377583 | 11,43841667 | 0,001341602 |
| A_51_P501453  | NM_022430    | Ms4a8a        | 64381  | 0,601143084 | 6,60012963  | 2,99E-06    |
| A_55_P2090209 | NM_022314    | Tpm3          | 59069  | 0,601010334 | 12,52000926 | 0,000553691 |
| A_55_P2169445 | NM_133829    | Mfsd6         | 98682  | 0,600989666 | 8,310583333 | 4,74E-10    |
| A_55_P1958840 | AK159653     | Itga6         | 16403  | 0,599919714 | 7,93437963  | 0,000150191 |
| A_55_P2043171 | NM_011090    | Lilra6        | 18726  | 0,599888712 | 6,779740741 | 1,15E-10    |
| A_52_P132165  | NM_053262    | Hsd17b11      | 114664 | 0,59958903  | 8,018064815 | 5,46E-08    |
| A_52_P195839  | NM_009982    | Ctsc          | 13032  | 0,598804452 | 8,140703704 | 0,0002938   |
| A_51_P396854  | NM_019502    | Timm10b       | 14356  | 0,597185215 | 9,505564815 | 2,75E-05    |
| A_51_P176352  | NM_013864    | Ndr2          | 29811  | 0,597166932 | 7,586611111 | 0,000881161 |
| A_55_P2073642 | NM_001085385 | 1600014C10Rik | 72244  | 0,596515103 | 6,39637037  | 2,25E-05    |
| A_55_P1963144 | NM_026849    | Mtmr14        | 97287  | 0,596037361 | 8,113101852 | 2,85E-06    |
| A_55_P2151273 | NM_001039176 | Elovl1        | 54325  | 0,59567806  | 9,43862037  | 1,20E-06    |
| A_55_P2143219 | NM_011242    | Rasgrp2       | 19395  | 0,594918124 | 10,58030556 | 0,001048428 |

|               |              |               |           |             |             |             |
|---------------|--------------|---------------|-----------|-------------|-------------|-------------|
| A_55_P1973854 | NM_013662    | Sema6b        | 20359     | 0,594775835 | 6,439796296 | 1,13E-07    |
| A_51_P136355  | NM_025331    | Gng11         | 66066     | 0,594638315 | 14,14473148 | 0,008261841 |
| A_51_P100327  | NM_013683    | Tap1          | 21354     | 0,594023052 | 6,887398148 | 1,63E-10    |
| A_55_P2161865 | NM_026131    | Pdlim7        | 67399     | 0,593734499 | 7,124759259 | 1,98E-06    |
| A_55_P2089804 | NM_146065    | Atf7          | 223922    | 0,593626391 | 7,779685185 | 8,60E-06    |
| A_55_P2071176 | NM_153511    | Il1f9         | 215257    | 0,593290143 | 6,500601852 | 1,00E-07    |
| A_51_P423290  | NM_027613    | Mmrn1         | 70945     | 0,592947536 | 9,287925926 | 0,005351185 |
| A_51_P209280  | NM_133685    | Rab31         | 106572    | 0,592561208 | 6,707425926 | 5,05E-12    |
| A_55_P2069306 | NM_011206    | Ptpn18        | 19253     | 0,59163593  | 12,4197037  | 0,000468879 |
| A_55_P1957378 | NM_011676    | Unc119        | 22248     | 0,591430843 | 9,308092593 | 6,52E-08    |
| A_55_P2077783 | NR_003964    | Tubb2a-ps2    | 627110    | 0,590869634 | 7,626296296 | 9,24E-05    |
| A_55_P2081530 | NM_080559    | Sh3bgrl3      | 73723     | 0,58995628  | 13,82543519 | 0,000175701 |
| A_55_P2014229 | NM_013658    | Sema4a        | 20351     | 0,589532591 | 10,1707037  | 5,79E-05    |
| A_55_P2091486 | NM_026827    | Tmem219       | 68742     | 0,589438792 | 7,869462963 | 2,60E-08    |
| A_52_P420466  | NM_175660    | Hist1h2ab     | 319172    | 0,58913434  | 8,086342593 | 0,000224514 |
| A_51_P308961  | NM_008254    | Hmgcl         | 15356     | 0,587104134 | 8,436657407 | 1,29E-06    |
| A_55_P1979330 | NM_011932    | Dapp1         | 26377     | 0,586855326 | 7,741722222 | 0,000317477 |
| A_55_P2088385 | NM_011618    | Tnnt1         | 21955     | 0,585482512 | 8,304046296 | 0,004147538 |
| A_52_P183181  | NM_001038587 | Adar          | 56417     | 0,584974563 | 7,421962963 | 4,51E-09    |
| A_52_P676956  | NM_054096    | Tirap         | 117149    | 0,583033386 | 6,662074074 | 3,83E-09    |
| A_55_P2072115 | NR_030671    | AW011738      | 100382    | 0,583030207 | 7,009277778 | 0,000342352 |
| A_55_P2007470 | NM_008808    | Pdgfa         | 18590     | 0,582876789 | 9,293731481 | 0,013714316 |
| A_65_P13209   | NM_009983    | Ctsd          | 13033     | 0,581430843 | 7,944740741 | 1,31E-05    |
| A_55_P2135200 | NM_181542    | Slfn10-ps     | 237887    | 0,58072655  | 6,917111111 | 9,29E-08    |
| A_55_P2139181 | NM_145575    | Cald1         | 109624    | 0,580478537 | 7,1415      | 0,002483852 |
| A_55_P2018847 | NM_001164735 | Crlf2         | 57914     | 0,580152623 | 10,32212963 | 5,68E-05    |
| A_66_P119518  | NM_017379    | Tuba8         | 53857     | 0,579490461 | 7,833675926 | 0,01323739  |
| A_66_P110633  | NM_001168660 | Apol9b        | 71898     | 0,578890302 | 6,52        | 0,000301268 |
| A_55_P1965725 | NM_008084    | Gapdh         | 14433     | 0,578735294 | 8,476805556 | 7,91E-08    |
| A_55_P2091191 | NM_172980    | Slc28a2       | 269346    | 0,578350556 | 8,225953704 | 0,000412334 |
| A_55_P2036627 | NM_001162938 | Pydc3         | 100033459 | 0,577033386 | 6,714962963 | 0,000582562 |
| A_55_P2035038 | XM_001473590 | Gm2437        | 100039816 | 0,576512719 | 10,77069444 | 0,025220765 |
| A_55_P2115136 | NM_028732    | 4632428N05Rik | 74048     | 0,576436407 | 8,745583333 | 6,34E-06    |
| A_55_P2184364 | NM_020579    | B4galt3       | 57370     | 0,576333068 | 7,759953704 | 0,002928697 |
| A_55_P2039878 | NM_010327    | Gp1bb         | 14724     | 0,576278219 | 6,676592593 | 9,70E-07    |
| A_51_P185660  | NM_011338    | Ccl9          | 20308     | 0,57623132  | 8,714972222 | 0,006329618 |
| A_55_P2148478 | NM_029652    | Klhl25        | 207952    | 0,575503975 | 8,809444444 | 8,93E-06    |
| A_55_P2158990 | NM_010591    | Jun           | 16476     | 0,574547695 | 7,340083333 | 6,48E-05    |
| A_55_P2162136 | NM_016957    | Hmgn2         | 15331     | 0,5740938   | 8,317037037 | 2,00E-07    |
| A_51_P327295  | NM_021473    | Akr1a1        | 58810     | 0,573801272 | 9,529277778 | 2,96E-06    |
| A_52_P59579   | NM_026669    | Tmbim6        | 110213    | 0,573536566 | 9,492361111 | 2,65E-06    |
| A_55_P2034663 | NM_007781    | Csf2rb2       | 12984     | 0,572753577 | 6,868148148 | 1,23E-10    |
| A_52_P671769  | NM_176837    | Arhgap18      | 73910     | 0,572538951 | 7,302648148 | 2,26E-05    |
| A_55_P2023076 | NM_023142    | Arpc1b        | 11867     | 0,57218283  | 11,02796296 | 4,18E-05    |
| A_51_P481159  | NM_173047    | Cbr3          | 109857    | 0,570787758 | 6,488712963 | 2,69E-07    |
| A_55_P2052385 | NM_194336    | Gbp6          | 100702    | 0,570282989 | 6,722925926 | 5,57E-08    |
| A_55_P2091691 | NM_019837    | Nudt3         | 56409     | 0,570074722 | 11,09701852 | 0,00963391  |
| A_55_P2010152 | NM_001164059 | Sell          | 20343     | 0,569461844 | 10,68915741 | 0,001167255 |
| A_55_P2041584 | XM_001003844 | F420015M19Rik | 619329    | 0,56940938  | 8,729768519 | 0,000519528 |
| A_55_P2000409 | NM_001002786 | Rab44         | 442827    | 0,568875994 | 7,850814815 | 0,000675838 |
| A_55_P2004562 | NM_001170851 | Klra2         | 16633     | 0,568720191 | 6,637796296 | 0,012669294 |

|               |              |               |           |             |             |             |
|---------------|--------------|---------------|-----------|-------------|-------------|-------------|
| A_55_P2016034 | NM_001033207 | Nlrc5         | 434341    | 0,568657393 | 8,375194444 | 0,000112183 |
| A_51_P323180  | NM_172777    | Gbp9          | 236573    | 0,568436407 | 7,656601852 | 0,000800126 |
| A_55_P2034928 | NM_001037925 | BC147527      | 625360    | 0,568415739 | 8,488175926 | 0,0026868   |
| A_55_P1953459 | NM_001171147 | Yap1          | 22601     | 0,568265501 | 8,072425926 | 0,005896461 |
| A_51_P198645  | NM_133167    | Parvb         | 170736    | 0,568194754 | 7,921083333 | 0,005306955 |
| A_51_P465281  | NM_008495    | Lgals1        | 16852     | 0,567460254 | 10,32913889 | 7,61E-05    |
| A_55_P2061170 | NM_198664    | Tbc1d2        | 381605    | 0,567430048 | 6,612824074 | 4,75E-07    |
| A_51_P345367  | NM_010724    | Psmb8         | 16913     | 0,567050079 | 9,702416667 | 9,26E-05    |
| A_55_P2137121 | NM_001013817 | Sp140         | 434484    | 0,566769475 | 7,267518519 | 3,57E-06    |
| A_55_P2064043 | NM_009851    | Cd44          | 12505     | 0,566651033 | 8,328231481 | 2,83E-06    |
| A_55_P1966719 | XM_001478568 | Gm3806        | 100042368 | 0,566311606 | 8,587851852 | 0,000523779 |
| A_51_P297679  | NM_008225    | Hcls1         | 15163     | 0,566287758 | 11,24012963 | 9,07E-05    |
| A_55_P2025611 | NM_011190    | Psme2         | 19188     | 0,56472337  | 9,746851852 | 3,81E-07    |
| A_51_P356283  | NM_133765    | Fbxo31        | 76454     | 0,564350556 | 7,914861111 | 5,00E-05    |
| A_66_P104815  | NM_007899    | Ecm1          | 13601     | 0,563922893 | 7,854509259 | 0,001136536 |
| A_55_P1960960 | NM_172465    | Zdhhc9        | 208884    | 0,563786963 | 8,284092593 | 1,68E-06    |
| A_55_P1994258 | NM_008084    | Gapdh         | 14433     | 0,563704293 | 8,384388889 | 5,52E-07    |
| A_55_P2125588 | NM_008808    | Pdgfa         | 18590     | 0,563411765 | 8,87212963  | 0,012095691 |
| A_52_P116134  | NM_009656    | Aldh2         | 11669     | 0,56240461  | 10,23852778 | 0,045898641 |
| A_51_P487360  | NM_016677    | Hpcal1        | 53602     | 0,560825914 | 8,708416667 | 0,000147355 |
| A_55_P2176731 | NM_007453    | Prdx6         | 11758     | 0,560297297 | 10,33840741 | 0,000989618 |
| A_55_P2039038 | NM_001081750 | Zfp664        | 269704    | 0,560158983 | 8,292018519 | 0,014650064 |
| A_55_P1960216 | NM_009842    | Cd151         | 12476     | 0,559999205 | 8,02787963  | 0,005406054 |
| A_51_P423091  | NM_008027    | Flot1         | 14251     | 0,559683625 | 8,323222222 | 1,38E-06    |
| A_52_P233441  | NM_008090    | Gata2         | 14461     | 0,559532591 | 7,210648148 | 0,000119513 |
| A_52_P518808  | BC027020     | Mmd           | 67468     | 0,559304452 | 8,388638889 | 0,028253126 |
| A_55_P2042823 | NM_001145859 | Sh3bp2        | 24055     | 0,558265501 | 8,209074074 | 2,26E-05    |
| A_51_P153053  | NM_020561    | Smpd3a        | 57319     | 0,556477742 | 9,800231481 | 0,000347883 |
| A_55_P2119463 | NM_010281    | Ggh           | 14590     | 0,556271065 | 8,060472222 | 0,00045426  |
| A_55_P1976212 | NM_009151    | Selplg        | 20345     | 0,55599841  | 9,165814815 | 2,12E-06    |
| A_55_P1959703 | BC098458     | Zfp646        | 233905    | 0,555878378 | 11,88937963 | 1,13E-05    |
| A_52_P253915  | NM_138651    | Cds2          | 110911    | 0,555058029 | 7,374935185 | 4,03E-09    |
| A_52_P590396  | NM_019972    | Sort1         | 20661     | 0,554605723 | 6,741037037 | 9,86E-08    |
| A_55_P1970763 | NM_001024932 | Pilrb2        | 545812    | 0,554024642 | 6,661138889 | 2,67E-07    |
| A_55_P2179030 | NM_017375    | Ostf1         | 20409     | 0,553557234 | 9,541583333 | 4,35E-07    |
| A_55_P2171463 | NM_009145    | Nptn          | 20320     | 0,553510334 | 11,59846296 | 0,01295726  |
| A_55_P1987709 | AK034145     | Ptprd         | 19266     | 0,552261526 | 6,466342593 | 2,88E-05    |
| A_55_P2060303 | NM_008624    | Mras          | 17532     | 0,551333068 | 7,534324074 | 0,002707688 |
| A_51_P417839  | NM_207225    | Hdac4         | 208727    | 0,550934022 | 6,886638889 | 8,01E-06    |
| A_55_P2108690 | NR_033633    | Gm8709        | 667572    | 0,550265501 | 8,472092593 | 8,87E-07    |
| A_55_P1977583 | NM_013469    | Anxa11        | 11744     | 0,550012719 | 8,883537037 | 0,000951997 |
| A_55_P2241299 | NM_001025613 | Otud7b        | 229603    | 0,54995469  | 7,24587963  | 0,000167408 |
| A_51_P483617  | NM_029554    | 0610040J01Rik | 76261     | 0,549942766 | 6,296018519 | 9,29E-08    |
| A_55_P2107347 | NM_013835    | Trove2        | 20822     | 0,549322734 | 7,488740741 | 8,19E-05    |
| A_55_P2141395 | NM_023463    | Ly6g6c        | 68468     | 0,548799682 | 10,2525     | 0,010118654 |
| A_55_P2359797 | NM_145857    | Nod2          | 257632    | 0,5486407   | 6,546685185 | 1,22E-09    |
| A_55_P2008907 | NM_009609    | Actg1         | 11465     | 0,54845151  | 13,50805556 | 0,003459158 |
| A_55_P2027102 | NM_134257    | Rgs3          | 50780     | 0,547888712 | 9,168611111 | 4,02E-05    |
| A_55_P2098558 | NM_013901    | Slc39a1       | 30791     | 0,547662162 | 8,40875     | 1,80E-07    |
| A_55_P2069850 | NM_011123    | Plp1          | 18823     | 0,547613672 | 8,760481481 | 0,023399487 |
| A_55_P2065824 | NM_001159284 | Smtn          | 29856     | 0,547153418 | 8,808842593 | 0,000520587 |

|               |              |               |           |             |             |             |
|---------------|--------------|---------------|-----------|-------------|-------------|-------------|
| A_55_P2051099 | NM_011609    | Tnfrsf1a      | 21937     | 0,547072337 | 8,569287037 | 2,39E-08    |
| A_55_P2011490 | XM_001473460 | Gm16510       | 100039766 | 0,546188394 | 7,759916667 | 6,91E-08    |
| A_55_P2072706 | NM_001081163 | Chsy1         | 269941    | 0,545944356 | 8,097925926 | 6,36E-06    |
| A_55_P2182358 | NM_007880    | Arid3a        | 13496     | 0,545782989 | 7,017638889 | 1,47E-08    |
| A_51_P357341  | NM_033444    | Clic1         | 114584    | 0,545500795 | 11,42609259 | 2,00E-05    |
| A_51_P433824  | NM_009415    | Tpi1          | 21991     | 0,543504769 | 9,855842593 | 0,000294935 |
| A_55_P2014319 | NM_001007578 | Armcx6        | 278097    | 0,543062798 | 7,052157407 | 2,16E-05    |
| A_55_P2103115 | NM_172843    | Tor1aip2      | 240832    | 0,54282035  | 7,626814815 | 3,40E-08    |
| A_65_P12392   | NM_011594    | Timp2         | 21858     | 0,540882353 | 7,313722222 | 1,66E-05    |
| A_55_P2033420 | NM_023220    | Sppl2a        | 66552     | 0,540763911 | 7,662935185 | 3,13E-07    |
| A_55_P1967533 | NR_003623    | Gm5069        | 277333    | 0,540633545 | 8,733787037 | 1,61E-06    |
| A_51_P459350  | NM_019771    | Dstn          | 56431     | 0,54045628  | 8,376518519 | 0,002626582 |
| A_51_P155142  | NM_026560    | Cdca8         | 52276     | 0,540281399 | 7,036722222 | 2,04E-09    |
| A_55_P2074291 | NM_015797    | Fbxo6         | 50762     | 0,540174881 | 8,558296296 | 6,99E-07    |
| A_51_P148355  | NM_175433    | Zfp710        | 209225    | 0,53963275  | 8,594777778 | 0,000117251 |
| A_55_P2003991 | NM_008207    | H2-T24        | 15042     | 0,539071542 | 7,127981481 | 4,15E-10    |
| A_55_P1979708 | NM_023305    | Ubap1         | 67123     | 0,538197933 | 9,075824074 | 0,003234261 |
| A_55_P1960237 | NM_172659    | Slc2a6        | 227659    | 0,537294913 | 6,482175926 | 9,20E-12    |
| A_51_P371051  | NM_028608    | Glipr1        | 73690     | 0,536761526 | 8,132222222 | 8,17E-06    |
| A_66_P123635  | NM_007780    | Csf2rb        | 12983     | 0,536513514 | 7,196111111 | 4,10E-09    |
| A_55_P2030638 | NM_026725    | Dusp23        | 68440     | 0,535897456 | 7,128453704 | 0,005311018 |
| A_55_P2068892 | NM_010559    | Il6ra         | 16194     | 0,535693164 | 10,31016667 | 0,00310577  |
| A_55_P1959305 | NM_178446    | Rbm47         | 245945    | 0,535573132 | 6,663731481 | 2,65E-07    |
| A_55_P2082319 | NM_001024721 | BC094916      | 545384    | 0,535561208 | 7,76187037  | 0,007237909 |
| A_51_P494361  | NM_175341    | Mbnl2         | 105559    | 0,535182035 | 8,717787037 | 8,25E-05    |
| A_55_P2135986 | NM_029499    | Ms4a4c        | 64380     | 0,534199523 | 9,663231481 | 0,013261634 |
| A_55_P2001233 | NM_001162938 | Pydc3         | 100033459 | 0,533943561 | 8,71787963  | 0,024387837 |
| A_51_P392705  | NM_009531    | Xpc           | 22591     | 0,533037361 | 7,845435185 | 5,63E-06    |
| A_52_P329917  | NM_022999    | Prrg2         | 65116     | 0,531169316 | 7,190861111 | 1,06E-05    |
| A_55_P2116924 | NM_001037999 | Dbi           | 13167     | 0,529570747 | 9,234648148 | 1,68E-05    |
| A_55_P2107207 | AK009736     | Gpr137b-ps    | 664862    | 0,529243243 | 7,61862963  | 6,01E-07    |
| A_55_P2106666 | NM_009624    | Adcy9         | 11515     | 0,528652623 | 7,185842593 | 0,001056444 |
| A_66_P117933  | NM_001005858 | I830012O16Rik | 667370    | 0,528476153 | 6,184398148 | 1,69E-09    |
| A_66_P119174  | NM_026036    | Cmtm6         | 67213     | 0,52763752  | 9,873       | 0,000111734 |
| A_55_P2099378 | NM_172472    | Tfe3          | 209446    | 0,526627186 | 8,377601852 | 6,25E-11    |
| A_51_P390715  | NM_011577    | Tgfb1         | 21803     | 0,526486486 | 7,828740741 | 0,000208144 |
| A_55_P1965772 | NM_001163337 | Atp2a3        | 53313     | 0,525864865 | 9,958814815 | 0,001394893 |
| A_66_P124549  | NM_001159551 | H13           | 14950     | 0,523899841 | 9,615203704 | 0,000176448 |
| A_51_P350817  | NM_009922    | Cnn1          | 12797     | 0,523484102 | 6,673712963 | 0,01501257  |
| A_55_P2130975 | NM_010881    | Ncoa1         | 17977     | 0,523430843 | 8,1285      | 0,000241468 |
| A_52_P393306  | NM_009222    | Snap23        | 20619     | 0,523114467 | 8,369518519 | 0,00083244  |
| A_55_P2017944 | NM_026695    | Etfb          | 110826    | 0,523109698 | 9,463074074 | 3,17E-05    |
| A_52_P550173  | NM_013730    | Slamf1        | 27218     | 0,52259062  | 8,208953704 | 0,009383272 |
| A_55_P1998957 | NM_033541    | Oas1c         | 114643    | 0,521787758 | 7,273138889 | 0,000327033 |
| A_51_P127681  | NM_013885    | Clic4         | 29876     | 0,52167806  | 9,962916667 | 0,038086832 |
| A_55_P2143233 | NM_011242    | Rasgrp2       | 19395     | 0,521677266 | 10,20209259 | 0,002083081 |
| A_51_P435339  | NM_010149    | Epor          | 13857     | 0,521304452 | 7,149101852 | 1,33E-06    |
| A_51_P238786  | NM_008562    | Mcl1          | 17210     | 0,521177266 | 11,44275    | 0,000974178 |
| A_55_P2063251 | NM_028207    | Dusp3         | 72349     | 0,520821145 | 7,589064815 | 0,005535374 |
| A_55_P2074942 | NM_010484    | Slc6a4        | 15567     | 0,52054531  | 8,301111111 | 0,013155525 |
| A_55_P2086810 | NM_001013817 | Sp140         | 434484    | 0,520146264 | 6,868425926 | 1,24E-08    |



|               |              |           |        |             |             |             |
|---------------|--------------|-----------|--------|-------------|-------------|-------------|
| A_52_P191975  | NM_001003934 | Rtn3      | 20168  | 0,519098569 | 7,720796296 | 4,16E-05    |
| A_55_P1994927 | NM_144538    | Rab3il1   | 74760  | 0,518628776 | 9,215768519 | 0,049701688 |
| A_51_P308681  | NM_001081059 | Mcur1     | 76137  | 0,518620827 | 7,367527778 | 2,91E-07    |
| A_55_P2071329 | NM_019566    | Rhog      | 56212  | 0,518357711 | 11,73825926 | 1,14E-06    |
| A_51_P227718  | NM_145149    | Rasgrp4   | 233046 | 0,518279014 | 6,534675926 | 1,73E-08    |
| A_55_P2129291 | NM_146114    | Dclre1c   | 227525 | 0,518111288 | 6,952296296 | 3,17E-05    |
| A_51_P342669  | NM_023418    | Pgam1     | 18648  | 0,517946741 | 9,157212963 | 0,000119368 |
| A_51_P509573  | NM_013652    | Ccl4      | 20303  | 0,517934817 | 6,682351852 | 6,39E-07    |
| A_55_P2064507 | NM_026322    | Msra      | 110265 | 0,517645469 | 7,634888889 | 0,012848279 |
| A_51_P350073  | NM_023668    | Ndel1     | 83431  | 0,517342607 | 8,375416667 | 5,81E-06    |
| A_51_P154973  | NM_021547    | Stard3    | 59045  | 0,516085056 | 8,154731481 | 3,30E-05    |
| A_55_P1960416 | NM_146069    | Nrros     | 224109 | 0,515130366 | 9,995518519 | 0,002243703 |
| A_55_P2103837 | NM_008620    | Gbp4      | 17472  | 0,515094595 | 7,996435185 | 8,05E-05    |
| A_55_P2013948 | NM_146120    | Gsn       | 227753 | 0,514602544 | 10,84983333 | 0,006344857 |
| A_52_P359965  | NM_007754    | Cpd       | 12874  | 0,514337043 | 6,522092593 | 8,56E-06    |
| A_51_P403334  | NM_024192    | Cuedc2    | 67116  | 0,514275835 | 9,044638889 | 2,12E-05    |
| A_55_P2074206 | NM_146128    | Dlgap4    | 228836 | 0,514180445 | 9,12725     | 2,63E-05    |
| A_52_P563617  | NM_133772    | Ssbp4     | 76900  | 0,513921304 | 8,691601852 | 3,34E-06    |
| A_55_P2061737 | NM_021278    | Tmsb4x    | 19241  | 0,513563593 | 16,31826852 | 0,001880406 |
| A_55_P2062851 | NM_020575    | March7    | 57438  | 0,513102544 | 8,875805556 | 0,000565862 |
| A_55_P2080603 | NM_031165    | Hspa8     | 15481  | 0,513038951 | 13,41937963 | 0,019217955 |
| A_52_P498086  | NM_011355    | Spi1      | 20375  | 0,512751987 | 6,518388889 | 9,78E-11    |
| A_55_P2184601 | NM_008400    | Itgal     | 16408  | 0,512426868 | 7,820342593 | 0,000333282 |
| A_66_P126138  | NM_010881    | Ncoa1     | 17977  | 0,511235294 | 7,293055556 | 1,50E-05    |
| A_55_P1953301 | NM_146126    | Sord      | 20322  | 0,511066773 | 8,203851852 | 0,072720766 |
| A_52_P522427  | NM_197944    | Hsh2d     | 209488 | 0,510577901 | 6,769546296 | 1,26E-09    |
| A_55_P2024841 | NM_008185    | Gstt1     | 14871  | 0,510135135 | 7,105537037 | 1,93E-05    |
| A_55_P2066384 | NM_009652    | Akt1      | 11651  | 0,509993641 | 9,380851852 | 0,000487393 |
| A_55_P1970788 | NM_176912    | C5ar2     | 319430 | 0,509800477 | 6,424601852 | 0,000996563 |
| A_55_P1993789 | NM_016957    | Hmgn2     | 15331  | 0,509599364 | 9,055611111 | 0,000241468 |
| A_55_P2086500 | NM_021494    | Dennd5a   | 19347  | 0,509428458 | 9,487935185 | 2,19E-07    |
| A_55_P2059904 | NM_001081163 | Chsy1     | 269941 | 0,508788553 | 7,796555556 | 8,76E-06    |
| A_55_P1955841 | NM_008906    | Ctsa      | 19025  | 0,508623211 | 10,78064815 | 0,005398597 |
| A_55_P1967266 | NM_138749    | Plxbn2    | 140570 | 0,508472973 | 7,975898148 | 0,000263144 |
| A_52_P578790  | NM_013739    | Dok3      | 27261  | 0,508212242 | 8,499101852 | 0,000183453 |
| A_55_P2158478 | NM_028024    | Nkiras2   | 71966  | 0,507958665 | 8,143222222 | 7,91E-08    |
| A_66_P113487  | NM_011862    | Pacsin2   | 23970  | 0,507732909 | 10,22968519 | 0,002985087 |
| A_51_P263965  | NM_010442    | Hmox1     | 15368  | 0,507495231 | 7,333287037 | 4,28E-09    |
| A_51_P295192  | NM_010907    | Nfkbia    | 18035  | 0,50667965  | 10,42178704 | 0,004806087 |
| A_55_P2117525 | NM_001166410 | Rbm3      | 19652  | 0,50641256  | 9,456398148 | 0,000861671 |
| A_55_P2000127 | NM_009365    | Tgfb1i1   | 21804  | 0,506201908 | 7,973018519 | 0,006907127 |
| A_51_P172231  | NM_026960    | Gsdmd     | 69146  | 0,50613752  | 7,919268519 | 3,87E-08    |
| A_51_P146303  | NM_028617    | Mvb12a    | 73711  | 0,505866455 | 7,879759259 | 6,90E-07    |
| A_52_P513177  | NM_001029841 | Sla       | 20491  | 0,505747218 | 8,923148148 | 0,00206063  |
| A_51_P217336  | NM_029153    | Scamp1    | 107767 | 0,505565183 | 7,997935185 | 0,018725611 |
| A_55_P2033445 | NM_011610    | Tnfrsf1b  | 21938  | 0,505337043 | 6,874425926 | 6,12E-06    |
| A_55_P1990548 | NM_145476    | Tbc1d22a  | 223754 | 0,505104928 | 8,897296296 | 0,000375458 |
| A_52_P429774  | NM_146105    | Cnst      | 226744 | 0,505038951 | 8,049898148 | 0,00023345  |
| A_51_P382849  | NM_010330    | Emb       | 13723  | 0,505007949 | 8,506759259 | 0,004964674 |
| A_52_P498208  | NM_178183    | Hist1h2ak | 319169 | 0,504312401 | 8,741694444 | 5,09E-05    |
| A_55_P2088995 | NM_011636    | Plscr1    | 22038  | 0,504026232 | 6,777027778 | 5,34E-09    |

|               |              |               |           |              |             |             |
|---------------|--------------|---------------|-----------|--------------|-------------|-------------|
| A_55_P2144850 | NM_011186    | Psmb5         | 19173     | 0,504022258  | 11,48990741 | 1,18E-05    |
| A_55_P2000224 | NM_001042580 | Cd63          | 12512     | 0,504010334  | 8,546046296 | 8,19E-05    |
| A_55_P1973033 | NM_019919    | Ltbp1         | 268977    | 0,501868839  | 7,646490741 | 0,004087291 |
| A_55_P2064557 | NM_011046    | Furin         | 18550     | 0,501685215  | 8,37212963  | 2,95E-05    |
| A_55_P1988202 | NM_001045481 | Ifi203        | 15950     | 0,501218601  | 8,755898148 | 0,076954084 |
| A_51_P510849  | NM_030018    | Tmem50b       | 77975     | 0,500843402  | 8,594935185 | 2,36E-06    |
| A_51_P440047  | NM_173752    | Lgalsl        | 216551    | 0,500704293  | 8,528222222 | 0,07059954  |
| A_52_P190973  | NM_009502    | Vcl           | 22330     | 0,500658188  | 7,454425926 | 0,000228018 |
| A_52_P456134  | NM_010046    | Dgat1         | 13350     | 0,500160572  | 6,949555556 | 2,40E-06    |
| A_55_P1971076 | NM_015804    | Atp11a        | 50770     | 0,500151828  | 6,461490741 | 8,98E-07    |
| A_51_P503303  | NM_021550    | C1galt1c1     | 59048     | 0,50008744   | 6,985740741 | 3,83E-06    |
| A_66_P108152  | NM_007620    | Cbr1          | 12408     | -0,50063752  | 9,5085      | 1,35E-05    |
| A_52_P658034  | NM_009433    | Tspyl1        | 22110     | -0,500812401 | 10,5812037  | 0,001246843 |
| A_55_P2405244 | AV207074     | 1700061N14Rik | 73432     | -0,500880763 | 7,946333333 | 0,012460523 |
| A_55_P2088690 | XM_001478162 | Gm3652        | 100042078 | -0,500950715 | 7,932314815 | 0,017242737 |
| A_66_P111089  | NM_026454    | Ube2f         | 67921     | -0,501470588 | 8,46137037  | 0,04954512  |
| A_55_P1995607 | NM_207551    | Olfr209       | 404311    | -0,501981717 | 8,671990741 | 0,032817934 |
| A_55_P2042086 | NM_008738    | Nrtn          | 18188     | -0,502399046 | 11,10085185 | 0,013935694 |
| A_52_P230688  | NM_025620    | Rep15         | 66532     | -0,502550874 | 7,178453704 | 0,000351883 |
| A_55_P2259500 | AK083809     | D130012P04Rik | 319377    | -0,502630366 | 8,600546296 | 0,01053706  |
| A_55_P2048550 | NM_001127686 | Hbb-bh2       | 436003    | -0,502674086 | 6,994722222 | 0,044564652 |
| A_55_P1984118 | NM_020014    | Gfra4         | 14588     | -0,503096979 | 13,78931481 | 0,032817934 |
| A_51_P159612  | NM_019487    | Hebp2         | 56016     | -0,503933227 | 8,501888889 | 0,026914082 |
| A_66_P102719  | NM_025287    | Spop          | 20747     | -0,504647854 | 10,5330463  | 0,000174432 |
| A_51_P307325  | NM_009030    | Rbbp4         | 19646     | -0,505424483 | 10,03292593 | 0,007875388 |
| A_51_P516148  | NM_016984    | Trpc4         | 22066     | -0,505846582 | 8,521842593 | 0,063117413 |
| A_55_P2422318 | AK014953     | 4921523P09Rik | 70926     | -0,505897456 | 7,079101852 | 0,000565841 |
| A_51_P481768  | NM_018756    | Tcstv1        | 54382     | -0,506058029 | 7,001638889 | 0,001612931 |
| A_55_P2000613 | NM_178703    | Slc6a1        | 232333    | -0,50622973  | 8,656138889 | 0,011440199 |
| A_55_P1966169 | BC091753     | Pdpdf         | 66496     | -0,506431638 | 10,59382407 | 0,000401136 |
| A_51_P412914  | NM_010112    | Efs           | 13644     | -0,50654213  | 7,413277778 | 0,001715561 |
| A_55_P2136763 | XM_886587    | Gm6293        | 622178    | -0,508891892 | 9,784814815 | 0,002200084 |
| A_55_P2168663 | NM_007507    | Atp5k         | 11958     | -0,508971383 | 11,11140741 | 0,000176155 |
| A_55_P2019784 | NM_028880    | Lrrtm1        | 74342     | -0,509034181 | 8,402305556 | 0,011843864 |
| A_55_P1996365 | NM_206975    | Ifna14        | 404549    | -0,509460254 | 7,831601852 | 0,010236283 |
| A_55_P1984640 | NM_026454    | Ube2f         | 67921     | -0,510559618 | 9,785907407 | 0,03911542  |
| A_55_P2002578 | NM_010145    | Ephx1         | 13849     | -0,510569157 | 8,963518519 | 0,008111721 |
| A_51_P346453  | NM_153570    | Noc4l         | 100608    | -0,512120032 | 9,99475     | 0,018194783 |
| A_55_P2102155 | NM_001177795 | Rgs20         | 58175     | -0,512737679 | 11,27644444 | 0,044009794 |
| A_55_P2041634 | NM_001081041 | Vps51         | 68505     | -0,51281399  | 11,68883333 | 0,067145066 |
| A_55_P2171773 | AK076976     | LOC102636217  | 102636217 | -0,513386328 | 8,417       | 0,01330405  |
| A_55_P2149615 | NM_009750    | Ngfrap1       | 12070     | -0,514350556 | 11,55289815 | 0,019486788 |
| A_55_P2097340 | NM_145621    | Camkv         | 235604    | -0,514515103 | 7,106314815 | 0,000204804 |
| A_51_P136888  | NM_009029    | Rb1           | 19645     | -0,514599364 | 9,978462963 | 0,011498059 |
| A_52_P650855  | NM_177390    | Myo1d         | 338367    | -0,515364865 | 8,70737963  | 0,054465974 |
| A_55_P2083184 | NR_026831    | Gm10272       | 16697     | -0,515754372 | 8,883083333 | 0,004572907 |
| A_55_P1960664 | XM_001475067 | Gm3035        | 100040908 | -0,516077107 | 10,92350926 | 0,01756973  |
| A_55_P2106844 | XM_001476912 | Gm7475        | 665070    | -0,516159777 | 9,469305556 | 0,034149744 |
| A_55_P1989149 | NM_147007    | Olfr394       | 259009    | -0,516183625 | 9,102083333 | 0,036574024 |
| A_55_P2152547 | NM_010859    | Myl3          | 17897     | -0,516597774 | 9,244740741 | 0,016736731 |
| A_55_P2007991 | NM_009449    | Tuba3b        | 22147     | -0,517183625 | 9,159898148 | 0,0113863   |

|               |              |               |           |              |             |             |
|---------------|--------------|---------------|-----------|--------------|-------------|-------------|
| A_55_P1961458 | NR_001586    | Speer1-ps1    | 70896     | -0,517600159 | 12,95308333 | 0,0659369   |
| A_55_P1999108 | NM_010031    | Defa1         | 13216     | -0,517810016 | 10,35452778 | 0,024186873 |
| A_66_P112593  | NM_024171    | Sec61b        | 66212     | -0,517922893 | 11,93300926 | 0,059097451 |
| A_55_P2008258 | NM_001040399 | Larp1b        | 214048    | -0,517935612 | 8,362824074 | 0,005535374 |
| A_55_P2105220 | NM_153571    | Hscb          | 100900    | -0,518086645 | 12,28975    | 0,061222345 |
| A_55_P1985911 | NM_010919    | Nkx2-2        | 18088     | -0,518149444 | 8,336648148 | 0,005318003 |
| A_55_P2089198 | NM_011880    | Rgs7          | 24012     | -0,518401431 | 10,60941667 | 0,030995856 |
| A_55_P2062926 | NM_001033347 | D430041D05Rik | 241589    | -0,518876789 | 11,15462037 | 0,013333039 |
| A_55_P2008021 | NM_026838    | Srpx2         | 68792     | -0,519580286 | 9,944314815 | 0,025103246 |
| A_52_P237652  | NR_015556    | 2610035D17Rik | 72386     | -0,519639905 | 7,479509259 | 0,050852152 |
| A_55_P1961152 | NM_011141    | Pou3f1        | 18991     | -0,519666932 | 9,065990741 | 0,005541575 |
| A_66_P125634  | NM_172864    | Wdr63         | 242253    | -0,519906995 | 10,41312037 | 0,008167814 |
| A_66_P139586  | NM_001033404 | Gm813         | 328695    | -0,520383943 | 8,312675926 | 0,03385873  |
| A_55_P2040962 | NM_001033442 | Gm1604b       | 381059    | -0,520553259 | 10,48164815 | 0,003104604 |
| A_55_P2129776 | NM_030890    | Prrt1         | 260297    | -0,521035771 | 8,515935185 | 0,007141074 |
| A_52_P483959  | NM_207233    | C1ql2         | 226359    | -0,521573132 | 9,628861111 | 0,040585911 |
| A_55_P2101074 | XM_001472853 | Gm3848        | 100042441 | -0,521846582 | 8,53387963  | 0,011219685 |
| A_55_P1970920 | NM_011591    | Timm17b       | 21855     | -0,522114467 | 10,49316667 | 0,000189691 |
| A_55_P2037712 | NM_133786    | Smc4          | 70099     | -0,522153418 | 8,451787037 | 4,34E-06    |
| A_55_P2096485 | NM_025784    | Bcs1l         | 66821     | -0,522192369 | 9,751907407 | 0,001351427 |
| A_51_P311362  | AK015429     | 4930449E01Rik | 74864     | -0,523445946 | 8,077842593 | 0,007532339 |
| A_55_P2144781 | NM_173421    | Erich5        | 239368    | -0,523463434 | 9,602212963 | 0,035620182 |
| A_55_P1963639 | NM_026716    | Sycn          | 68416     | -0,523631955 | 9,225509259 | 0,031045272 |
| A_52_P475870  | NM_001164686 | Tmem29        | 382245    | -0,523655008 | 7,601111111 | 0,001299702 |
| A_55_P2023937 | NM_022016    | Impg1         | 63859     | -0,524084261 | 10,28211111 | 0,040359559 |
| A_66_P110490  | NM_030229    | Polr3h        | 78929     | -0,524474563 | 7,156490741 | 0,000189691 |
| A_55_P2037235 | NM_175397    | Sp110         | 109032    | -0,524672496 | 9,110296296 | 0,00385399  |
| A_51_P266248  | AK134885     | Ighv14-2      | 668421    | -0,524781399 | 10,20339815 | 0,002405638 |
| A_55_P2030938 | NM_025863    | Trim59        | 66949     | -0,525135135 | 8,752685185 | 0,017363642 |
| A_55_P1960496 | NM_025800    | Ppp1r2        | 66849     | -0,52513752  | 9,301212963 | 0,00423013  |
| A_66_P130449  | NM_207270    | Ptprh         | 545902    | -0,525191574 | 7,812175926 | 0,017147599 |
| A_51_P359485  | NM_024231    | Zfp1          | 81909     | -0,525248013 | 10,18866667 | 0,007427134 |
| A_55_P2200628 | AK014629     | 4733401D01Rik | 70847     | -0,52536725  | 10,58355556 | 0,025716125 |
| A_52_P638283  | NM_207258    | Fam71f1       | 330277    | -0,525460254 | 7,163138889 | 0,000934895 |
| A_55_P2096768 | NM_009027    | Rasgrf2       | 19418     | -0,525955485 | 7,998740741 | 0,004724707 |
| A_55_P1970274 | NM_001033425 | Zscan10       | 332221    | -0,526473768 | 8,541944444 | 0,012591497 |
| A_55_P2051039 | NM_001099346 | Gm11937       | 100041488 | -0,526546105 | 11,0864537  | 0,009070448 |
| A_55_P2038152 | NM_183173    | Sowaha        | 237761    | -0,526983307 | 8,312712963 | 0,032407207 |
| A_51_P159711  | NM_053070    | Car7          | 12354     | -0,527248013 | 11,4307963  | 0,013700943 |
| A_55_P2362601 | AK078562     | D4ErtD681e    | 52421     | -0,527648649 | 9,265962963 | 0,009187017 |
| A_55_P2177721 | NM_007416    | Adra1b        | 11548     | -0,528220986 | 10,80462963 | 0,050959399 |
| A_55_P2207335 | AK042215     | Nron          | 320482    | -0,529193959 | 12,86596296 | 0,024209876 |
| A_55_P1982818 | NM_013614    | Odc1          | 18263     | -0,529507949 | 9,488953704 | 0,000376599 |
| A_55_P1957850 | NM_025664    | Snx9          | 66616     | -0,52963275  | 7,824574074 | 0,0154609   |
| A_55_P2066219 | XM_001473544 | Gm3455        | 100041653 | -0,529893482 | 7,794777778 | 0,007427134 |
| A_66_P100932  | NM_026982    | Tmem256       | 69186     | -0,530657393 | 13,91134259 | 0,037016124 |
| A_51_P299632  | NM_027641    | Spef1         | 70997     | -0,530693959 | 8,884935185 | 0,003176709 |
| A_51_P133638  | NR_030776    | 3110021A11Rik | 67289     | -0,531258347 | 7,930842593 | 0,003042339 |
| A_55_P2087013 | NM_010432    | Hipk1         | 15257     | -0,531341812 | 8,165814815 | 0,014206579 |
| A_55_P1955542 | NM_146952    | Olfir522      | 258954    | -0,531562003 | 9,025546296 | 0,010384693 |
| A_51_P133097  | NR_033452    | Gm4013        | 100042757 | -0,531692369 | 8,638898148 | 0,006971495 |

|               |              |               |        |              |             |             |
|---------------|--------------|---------------|--------|--------------|-------------|-------------|
| A_52_P69109   | NM_011387    | Slc10a1       | 20493  | -0,531873609 | 8,269009259 | 0,036099654 |
| A_66_P122729  | NM_025594    | Zmat2         | 66492  | -0,532011129 | 8,644944444 | 0,00201568  |
| A_55_P2101585 | NM_010016    | Cd55          | 13136  | -0,532230525 | 7,454       | 0,000429605 |
| A_55_P2168316 | NM_001177438 | Aldh3b2       | 621603 | -0,532420509 | 6,588046296 | 0,020362125 |
| A_55_P2062444 | NM_133771    | Memo1         | 76890  | -0,533394277 | 11,14605556 | 0,025006508 |
| A_55_P2037111 | NM_009391    | Ran           | 19384  | -0,533609698 | 7,074731481 | 1,25E-06    |
| A_65_P12359   | NM_001033768 | Pin1rt1       | 241593 | -0,533653418 | 10,25990741 | 0,005579146 |
| A_51_P160413  | NM_178691    | Yod1          | 226418 | -0,533972178 | 7,531953704 | 0,00364044  |
| A_66_P118316  | AK006709     | 1700047G07Rik | 73323  | -0,534427663 | 8,213759259 | 0,002942116 |
| A_51_P521052  | NM_029627    | Ly6k          | 76486  | -0,534853736 | 8,894055556 | 0,003952076 |
| A_55_P2122666 | NM_153169    | Pnma3         | 245468 | -0,535236884 | 10,59535185 | 0,01538586  |
| A_55_P1995173 | NM_013614    | Odc1          | 18263  | -0,53545628  | 11,83790741 | 0,000142795 |
| A_55_P2000658 | NR_033578    | Gm15645       | 626055 | -0,53568601  | 8,94975     | 0,000214591 |
| A_52_P412452  | NM_017383    | Cntn6         | 53870  | -0,536062798 | 11,07763889 | 0,056380301 |
| A_52_P390944  | NM_016803    | Chst3         | 53374  | -0,536096184 | 7,860527778 | 0,000116894 |
| A_52_P457529  | NM_177069    | Fbxw21        | 320082 | -0,536157393 | 11,40557407 | 0,020915898 |
| A_55_P2148655 | NM_198410    | Paqr6         | 68957  | -0,536289348 | 8,728777778 | 0,00722329  |
| A_55_P2182700 | NM_031869    | Prkab1        | 19079  | -0,536910175 | 9,443175926 | 0,006347139 |
| A_55_P2080163 | NM_025821    | Carhsp1       | 52502  | -0,536995231 | 15,0215     | 0,001815965 |
| A_55_P2088725 | NM_021522    | Usp14         | 59025  | -0,53709539  | 8,796666667 | 0,021513429 |
| A_55_P2152901 | AK013627     | 2900040C04Rik | 72893  | -0,537879968 | 10,72530556 | 0,034448184 |
| A_55_P2279997 | AK016075     | 4930549C15Rik | 75243  | -0,538054054 | 10,73083333 | 0,019786514 |
| A_55_P2184931 | NM_028762    | Rbm19         | 74111  | -0,538522258 | 8,513453704 | 0,010600933 |
| A_55_P2155620 | NM_025282    | Mef2c         | 17260  | -0,538874404 | 9,667888889 | 0,037565457 |
| A_55_P1989996 | NM_013688    | Tcte1         | 21645  | -0,539497615 | 8,897314815 | 0,006066438 |
| A_66_P101835  | NM_007646    | Cd38          | 12494  | -0,541418124 | 8,302851852 | 0,000238607 |
| A_52_P91402   | NM_153160    | Zcchc17       | 619605 | -0,541482512 | 9,498101852 | 3,49E-09    |
| A_55_P2035495 | NM_019778    | Zbtb20        | 56490  | -0,541957075 | 9,15112963  | 0,000347883 |
| A_55_P2153904 | XM_884529    | Gm6132        | 620143 | -0,542551669 | 12,33322222 | 0,002423921 |
| A_55_P2089955 | NM_001025086 | Rhox7         | 547168 | -0,543025437 | 11,50607407 | 0,015088776 |
| A_55_P2159565 | NM_207030    | Tas2r131      | 387356 | -0,543081081 | 7,885388889 | 0,006720943 |
| A_55_P2061492 | AK139523     | Pnlcd1        | 240023 | -0,543786169 | 9,808435185 | 0,00419657  |
| A_52_P589391  | NM_010069    | Doc2a         | 13446  | -0,54386407  | 8,391175926 | 0,009324676 |
| A_55_P2172299 | BC008275     | Timm17b       | 21855  | -0,544389507 | 10,69146296 | 0,000160811 |
| A_52_P473106  | NM_153114    | Otos          | 260301 | -0,544761526 | 7,725296296 | 0,000839833 |
| A_55_P2066927 | AK088379     | Galt          | 14430  | -0,544845787 | 9,148444444 | 0,006604927 |
| A_66_P109562  | XM_890719    | Gm12271       | 626150 | -0,545310016 | 10,93118519 | 0,002499312 |
| A_55_P2140107 | NM_009995    | Cyp21a1       | 13079  | -0,546071542 | 8,899722222 | 0,008095618 |
| A_55_P2008407 | NM_133485    | Ppp1r14c      | 76142  | -0,546076312 | 11,88877778 | 0,022827576 |
| A_55_P2073705 | NM_178667    | Tfdp2         | 211586 | -0,54681717  | 7,852240741 | 0,022122984 |
| A_51_P450527  | NM_011526    | Tagln         | 21345  | -0,547277424 | 11,73410185 | 0,00924514  |
| A_55_P2006018 | NM_009207    | Slc4a2        | 20535  | -0,547396661 | 9,797990741 | 0,000279194 |
| A_55_P2032192 | NM_001164249 | Tpm1          | 22003  | -0,547903021 | 10,08955556 | 0,010123427 |
| A_55_P1966070 | NM_199063    | Ssx9          | 382206 | -0,548151033 | 9,461944444 | 0,025342173 |
| A_55_P2085370 | NM_001172114 | Traf7         | 224619 | -0,548613672 | 8,245833333 | 0,004336721 |
| A_51_P148684  | NM_175006    | Pou6f2        | 218030 | -0,549671701 | 9,033490741 | 0,024026127 |
| A_55_P2009345 | NM_172908    | Ovch2         | 244199 | -0,54968601  | 10,99415741 | 0,018124622 |
| A_55_P2112085 | NM_027906    | Vwa8          | 219189 | -0,5498593   | 9,918009259 | 0,074813606 |
| A_55_P2054913 | NM_001011863 | Olfr406       | 258181 | -0,550413355 | 8,88612963  | 0,094691563 |
| A_51_P343309  | NM_009908    | Cmas          | 12764  | -0,550599364 | 10,9852963  | 0,04428996  |
| A_51_P273005  | NM_009611    | Actl7a        | 11470  | -0,551505564 | 7,265851852 | 0,003477286 |

|               |              |                |           |              |             |             |
|---------------|--------------|----------------|-----------|--------------|-------------|-------------|
| A_52_P309337  | NM_019648    | Metap2         | 56307     | -0,55181717  | 7,395314815 | 0,006378983 |
| A_52_P136751  | NM_007886    | Dtnb           | 13528     | -0,552123211 | 8,035046296 | 0,01619767  |
| A_55_P1980677 | NM_027037    | 1700007K09Rik  | 69318     | -0,552147059 | 12,74182407 | 0,026643936 |
| A_66_P120612  | NR_002873    | Vax2os         | 574519    | -0,552967409 | 8,71237963  | 0,007383344 |
| A_55_P1968774 | NM_001162365 | Ptk2b          | 19229     | -0,553254372 | 9,316388889 | 0,003234261 |
| A_52_P640194  | NM_001033531 | Klhl32         | 212390    | -0,553328299 | 8,99275     | 0,00687919  |
| A_55_P2015405 | NM_001114679 | 9930111J21Rik1 | 667214    | -0,553562798 | 9,889148148 | 0,012494139 |
| A_55_P2117959 | NM_007823    | Cyp4b1         | 13120     | -0,553630366 | 7,932601852 | 0,029734741 |
| A_55_P2013559 | NM_010075    | Dpp6           | 13483     | -0,553687599 | 8,631768519 | 0,004609462 |
| A_51_P439612  | NM_020266    | Dnajb2         | 56812     | -0,553878378 | 10,06549074 | 0,024439103 |
| A_55_P1970067 | NM_001129787 | Igsf9b         | 235086    | -0,554281399 | 9,003185185 | 0,004587747 |
| A_55_P2147736 | NM_011993    | Dpysl4         | 26757     | -0,554458665 | 9,102416667 | 0,003312561 |
| A_66_P108247  | NM_009464    | Ucp3           | 22229     | -0,554611288 | 13,23519444 | 0,005237385 |
| A_66_P106536  | NM_027360    | 2010107E04Rik  | 70257     | -0,554891892 | 11,8737963  | 7,04E-05    |
| A_55_P2169046 | NM_146444    | Olfr458        | 258436    | -0,555011924 | 9,200861111 | 0,009646801 |
| A_55_P2022509 | NM_172948    | Mgat5b         | 268510    | -0,555381558 | 9,739166667 | 0,030642685 |
| A_55_P2026982 | NM_173744    | Tdrp           | 72148     | -0,555852146 | 7,723814815 | 1,29E-05    |
| A_55_P1961908 | NM_001099324 | Gm15217        | 100041724 | -0,55636089  | 9,644407407 | 0,020297121 |
| A_55_P2117028 | NM_028860    | Mtmr3          | 74302     | -0,55681399  | 10,38918519 | 0,009938056 |
| A_55_P2100864 | NM_183250    | Tma7           | 66167     | -0,556991256 | 11,59841667 | 0,001235786 |
| A_55_P2103626 | NM_011989    | Slc27a4        | 26569     | -0,557649444 | 9,489083333 | 0,001953743 |
| A_55_P2132800 | AK041361     | Zfp367         | 238673    | -0,557757552 | 9,924509259 | 0,012923396 |
| A_55_P2164428 | NM_001033126 | Cd27           | 21940     | -0,558094595 | 9,205101852 | 0,002126623 |
| A_51_P401263  | NM_177752    | Eme1           | 268465    | -0,55895469  | 8,659953704 | 0,009488596 |
| A_55_P2396375 | AK007978     | 1810073O08Rik  | 72285     | -0,559178855 | 10,26906481 | 0,011939115 |
| A_52_P337259  | NM_013905    | Heyl           | 56198     | -0,559210652 | 10,01710185 | 0,019786514 |
| A_55_P1960423 | AK018877     | Atp8b3         | 67331     | -0,559542925 | 9,712138889 | 0,021391995 |
| A_55_P1990319 | NM_025516    | Ergic3         | 66366     | -0,559891097 | 12,64469444 | 0,009624334 |
| A_51_P261107  | NM_139144    | Ogt            | 108155    | -0,559944356 | 7,722981481 | 2,80E-05    |
| A_55_P2172822 | AK008925     | Mettl7a1       | 70152     | -0,56032194  | 9,197546296 | 0,031205607 |
| A_55_P2337138 | AK003962     | Ago2           | 239528    | -0,561131955 | 8,342814815 | 0,001472733 |
| A_51_P263667  | NM_007391    | Acrv1          | 11451     | -0,561445151 | 8,00562963  | 0,009484255 |
| A_55_P2168664 | NM_007507    | Atp5k          | 11958     | -0,561626391 | 11,05224074 | 3,30E-05    |
| A_51_P485594  | NM_025729    | Tab3           | 66724     | -0,562538951 | 8,072203704 | 0,016782469 |
| A_66_P101935  | NM_010669    | Krt6b          | 16688     | -0,562715421 | 7,995759259 | 0,009879852 |
| A_66_P104365  | NM_026782    | Ccdc167        | 68597     | -0,562728935 | 8,41475     | 0,001117539 |
| A_51_P480861  | NM_021453    | Pga5           | 58803     | -0,563742448 | 8,213555556 | 0,005628682 |
| A_51_P177491  | NM_023182    | Ctrl           | 109660    | -0,565725755 | 8,485990741 | 0,008700917 |
| A_55_P1960231 | NM_019913    | Txn2           | 56551     | -0,566281399 | 11,18796296 | 0,016126905 |
| A_55_P2145401 | NM_175653    | Hist1h3c       | 319148    | -0,56717965  | 10,49275926 | 0,002247365 |
| A_51_P282092  | NM_009478    | Urod           | 22275     | -0,567520668 | 11,24073148 | 0,013771371 |
| A_55_P1986213 | NM_001004156 | Plekhg5        | 269608    | -0,567557234 | 9,486824074 | 0,039269362 |
| A_66_P132496  | AY261387     | Asic3          | 171209    | -0,567920509 | 8,330722222 | 0,006066438 |
| A_52_P510877  | NM_009743    | Bcl2l1         | 12048     | -0,568135135 | 9,312222222 | 0,012723103 |
| A_55_P1979432 | NM_011563    | Prdx2          | 21672     | -0,568141494 | 15,02212963 | 0,030505513 |
| A_52_P87793   | NM_147118    | Olfr635        | 259122    | -0,568911765 | 8,711601852 | 0,010521716 |
| A_55_P2128324 | NM_153489    | Ubap2l         | 74383     | -0,569030207 | 10,05231481 | 0,033980453 |
| A_52_P238858  | NM_001174086 | Shisa9         | 72555     | -0,569113672 | 11,27528704 | 0,031135885 |
| A_51_P441745  | AK021396     | E130119H09Rik  | 78550     | -0,569239269 | 9,752083333 | 0,078982064 |
| A_55_P2155876 | NM_001113395 | Gm16501        | 100042840 | -0,570476153 | 7,546324074 | 0,001717953 |
| A_55_P2136906 | NM_009514    | Vpreb3         | 22364     | -0,572011129 | 8,692537037 | 0,002664341 |

|               |              |               |           |              |             |             |
|---------------|--------------|---------------|-----------|--------------|-------------|-------------|
| A_55_P2039896 | NM_028873    | Dnajc14       | 74330     | -0,573238474 | 9,006666667 | 0,013957564 |
| A_55_P1953545 | NM_010238    | Brd2          | 14312     | -0,573290143 | 7,859101852 | 0,011114533 |
| A_55_P2225460 | AK157022     | AW555355      | 99413     | -0,573336248 | 9,941305556 | 0,00580606  |
| A_55_P2251082 | AK033279     | Qk            | 19317     | -0,573538156 | 8,964990741 | 0,006523313 |
| A_51_P295315  | NM_020033    | Ankrd2        | 56642     | -0,573799682 | 8,16337037  | 0,001491411 |
| A_55_P1976574 | NM_016712    | Tmod4         | 50874     | -0,574079491 | 8,880796296 | 0,011821572 |
| A_51_P267700  | NM_026860    | Gkn3          | 68888     | -0,576871224 | 9,200648148 | 0,004103585 |
| A_66_P122219  | NM_001039347 | Kcnd3         | 56543     | -0,577384738 | 9,445296296 | 0,015121753 |
| A_55_P1964174 | NM_008704    | Nme1          | 18102     | -0,577413355 | 9,05912963  | 0,002897839 |
| A_52_P238523  | NM_183147    | Sprn          | 212518    | -0,577709857 | 9,85025     | 0,019486788 |
| A_55_P2065113 | NM_001177484 | Gm11559       | 100415785 | -0,578258347 | 10,84613889 | 0,001858845 |
| A_55_P1992889 | NM_009776    | Serping1      | 12258     | -0,578427663 | 11,64761111 | 0,032011697 |
| A_51_P506111  | NM_019544    | Msgn1         | 56184     | -0,57872496  | 8,146407407 | 0,005658956 |
| A_55_P2004354 | NR_033430    | Gm2694        | 100040294 | -0,579180445 | 8,646212963 | 0,006753719 |
| A_55_P2025008 | NM_001042489 | Hvcn1         | 74096     | -0,579258347 | 12,2989537  | 0,001382983 |
| A_55_P1973970 | NM_212485    | Krt73         | 223915    | -0,579437202 | 10,72153704 | 0,024702114 |
| A_66_P127024  | NM_013595    | Mbd3          | 17192     | -0,579512719 | 10,24775    | 3,59E-06    |
| A_55_P2001159 | NM_025699    | Oser1         | 66680     | -0,580015898 | 11,27411111 | 0,002988081 |
| A_55_P2083180 | NR_026831    | Gm10272       | 16697     | -0,580174086 | 8,25362037  | 0,001865877 |
| A_51_P172573  | NM_013671    | Sod2          | 20656     | -0,580700318 | 10,64458333 | 0,010416948 |
| A_66_P120605  | NM_001146085 | Fbxo34        | 78938     | -0,580982512 | 8,420037037 | 0,009315135 |
| A_55_P2136902 | NM_001085500 | Cisd3         | 217149    | -0,582262321 | 11,02477778 | 0,00267833  |
| A_55_P2152607 | NM_172306    | Cyp4a12b      | 13118     | -0,582459459 | 8,019407407 | 0,000824411 |
| A_55_P2208579 | NM_194268    | Onecut2       | 225631    | -0,582617647 | 10,66141667 | 0,024120728 |
| A_51_P237106  | NM_001011804 | Olfr1211      | 258025    | -0,58282194  | 8,44062963  | 0,008346316 |
| A_55_P2109032 | NM_146840    | Olfr545       | 258837    | -0,582964229 | 8,66162037  | 0,015539325 |
| A_55_P2083401 | NM_001110239 | Acp1          | 11431     | -0,583976948 | 9,17125     | 0,035220781 |
| A_55_P2108983 | NM_001033378 | A430078G23Rik | 319493    | -0,585720986 | 15,51973148 | 0,01582156  |
| A_55_P2162432 | NR_027847    | D630029K05Rik | 103175    | -0,585805246 | 7,86937963  | 0,00211168  |
| A_66_P110088  | XM_001476538 | Gm3265        | 100041308 | -0,587626391 | 8,807925926 | 0,00206063  |
| A_55_P2025468 | NM_009437    | Tst           | 22117     | -0,587846582 | 9,267157407 | 0,007744278 |
| A_55_P2169104 | NM_011858    | Tenm4         | 23966     | -0,588417329 | 9,275472222 | 0,01358816  |
| A_51_P139678  | NM_009264    | Sprr1a        | 20753     | -0,588488076 | 11,23662963 | 0,00720638  |
| A_55_P2035102 | BC083122     | Odc1          | 18263     | -0,589667727 | 10,6567037  | 5,25E-06    |
| A_51_P375771  | NM_001093750 | Ptchd1        | 211612    | -0,589903021 | 9,137277778 | 0,027136698 |
| A_52_P663704  | NM_001013384 | Podnl1        | 244550    | -0,589935612 | 10,70749074 | 0,010738532 |
| A_55_P2083368 | AK144366     | Gm2044        | 100039095 | -0,590656598 | 10,33655556 | 0,007443124 |
| A_55_P2009116 | NR_033558    | F830002L21Rik | 414125    | -0,592926073 | 7,509324074 | 0,00546925  |
| A_52_P334796  | NM_001008499 | Taar4         | 209513    | -0,593244833 | 12,11237037 | 0,054589382 |
| A_51_P221337  | NM_145824    | Ranbp10       | 74334     | -0,594325914 | 10,76512963 | 0,034864751 |
| A_55_P2316760 | AK020472     | 9430063H18Rik | 77359     | -0,594497615 | 8,94012963  | 0,00372165  |
| A_55_P1977071 | NM_028666    | Fam110a       | 73847     | -0,594629571 | 11,08633333 | 0,007798435 |
| A_55_P2046499 | NM_134228    | Vmn1r70       | 171262    | -0,594883943 | 11,47262963 | 0,004307484 |
| A_55_P1979126 | NM_009446    | Tuba3a        | 22144     | -0,595279809 | 10,85024074 | 0,008435834 |
| A_66_P125962  | NM_010432    | Hipk1         | 15257     | -0,595469793 | 8,953287037 | 0,010880272 |
| A_52_P87503   | NM_001033981 | Hbq1b         | 544763    | -0,59627186  | 12,4982963  | 0,011939115 |
| A_55_P1973448 | NM_016875    | Ybx2          | 53422     | -0,596705087 | 10,37117593 | 0,007427134 |
| A_55_P2279140 | AK089751     | F830014O18Rik | 403347    | -0,597169316 | 10,56041667 | 0,076435484 |
| A_55_P2088846 | NM_172799    | Ttll6         | 237930    | -0,597297297 | 8,147240741 | 0,002247979 |
| A_51_P452153  | NM_027222    | Mzb1          | 69816     | -0,598025437 | 8,141388889 | 4,39E-08    |
| A_52_P169901  | NM_001009949 | Slc25a51      | 230125    | -0,598469793 | 11,03223148 | 0,079557124 |

|               |              |               |           |              |             |             |
|---------------|--------------|---------------|-----------|--------------|-------------|-------------|
| A_55_P2163138 | NM_029360    | Tm4sf5        | 75604     | -0,598470588 | 9,331407407 | 3,77E-05    |
| A_55_P1996171 | NM_029508    | Pcgf5         | 76073     | -0,599185215 | 10,49306481 | 0,001480374 |
| A_55_P2063047 | XM_001472600 | Gm14206       | 100041796 | -0,599294118 | 8,737166667 | 0,003029508 |
| A_55_P2029121 | AK007848     | Pex11g        | 69129     | -0,600378378 | 8,45812963  | 0,000389255 |
| A_55_P2176802 | NM_010432    | Hipk1         | 15257     | -0,600975358 | 9,25525     | 0,01186166  |
| A_51_P150489  | NM_031378    | Gsdmc         | 83492     | -0,60118601  | 9,12687037  | 0,007346067 |
| A_55_P2001290 | NM_009454    | Ube2e3        | 22193     | -0,601482512 | 10,38099074 | 0,004678966 |
| A_55_P1960208 | NM_172955    | Vcan          | 13003     | -0,601750397 | 8,790777778 | 0,00276999  |
| A_55_P2008599 | NM_001162946 | Pcx           | 18563     | -0,601980127 | 7,34812037  | 0,00149154  |
| A_55_P2006148 | NM_001177438 | Aldh3b2       | 621603    | -0,602533386 | 6,943564815 | 0,030585965 |
| A_55_P2049186 | NM_032398    | Plvap         | 84094     | -0,603352146 | 7,702268519 | 0,000891735 |
| A_55_P1969511 | NM_029430    | Ttc23l        | 75777     | -0,603883148 | 7,344787037 | 0,013716666 |
| A_55_P2133910 | NM_029264    | Ttll10        | 330010    | -0,605363275 | 12,58086111 | 0,039931834 |
| A_66_P101013  | NM_027673    | Tssk4         | 71099     | -0,605368839 | 8,329092593 | 0,007481512 |
| A_55_P2244355 | AK010586     | 2410024N13Rik | 70000     | -0,605575517 | 8,234333333 | 0,005359248 |
| A_51_P120066  | NR_033222    | 9330151L19Rik | 414085    | -0,605766296 | 7,395055556 | 0,001028728 |
| A_51_P261835  | NM_025376    | Tmem8c        | 66139     | -0,606286963 | 8,723787037 | 0,003260668 |
| A_55_P2025746 | NM_007401    | Adam5         | 11499     | -0,607076312 | 8,886481481 | 0,005579566 |
| A_51_P513541  | NM_019437    | Rfk           | 54391     | -0,607808426 | 10,32150926 | 0,028720928 |
| A_55_P2096630 | NM_199066    | Ssxb9         | 387131    | -0,608570747 | 11,45022222 | 0,018012061 |
| A_55_P2101508 | NM_010205    | Fgf8          | 14179     | -0,609538156 | 9,452324074 | 0,006152839 |
| A_55_P1975266 | NM_027010    | Crygf         | 12969     | -0,610100159 | 8,363703704 | 0,005707766 |
| A_55_P1972792 | NM_009185    | Stil          | 20460     | -0,610946741 | 9,029064815 | 0,012698337 |
| A_51_P508770  | NM_011846    | Mmp17         | 23948     | -0,611028617 | 8,820685185 | 0,003222674 |
| A_55_P2416097 | AK038153     | A130082J08Rik | 320015    | -0,611177266 | 8,782083333 | 0,025776204 |
| A_55_P2031636 | NM_010512    | Igf1          | 16000     | -0,611709062 | 8,611277778 | 0,001831445 |
| A_51_P131216  | NM_030180    | Usp54         | 78787     | -0,611791733 | 10,89507407 | 0,007863254 |
| A_55_P2022812 | NM_001101445 | Cyp4f17       | 208285    | -0,61218283  | 10,00712963 | 0,042565761 |
| A_52_P484838  | NM_011266    | Rfxank        | 19727     | -0,614133545 | 8,238351852 | 3,28E-07    |
| A_55_P2159885 | NM_001166584 | Tead1         | 21676     | -0,614730525 | 10,59047222 | 0,025532049 |
| A_55_P1980671 | NM_001011743 | Olfr324       | 257892    | -0,615166137 | 9,34087963  | 0,020255862 |
| A_51_P237040  | NM_008711    | Nog           | 18121     | -0,61540461  | 10,34215741 | 0,013630649 |
| A_52_P276525  | NM_175207    | Ankrd9        | 74251     | -0,615558824 | 9,263787037 | 0,002730641 |
| A_55_P2110200 | NM_080562    | Ubox5         | 140629    | -0,615644674 | 9,018787037 | 0,006954828 |
| A_66_P132870  | AK039020     | Fcnaos        | 545410    | -0,615746423 | 8,466305556 | 0,002866507 |
| A_55_P2170514 | NM_018754    | Sfn           | 55948     | -0,615817965 | 7,771638889 | 0,000100302 |
| A_52_P318673  | NM_009117    | Saa1          | 20208     | -0,616033386 | 9,473314815 | 0,001839792 |
| A_55_P1989928 | NM_173756    | Lin52         | 217708    | -0,616133545 | 8,948481481 | 0,009031642 |
| A_51_P131653  | NM_029801    | Tsacc         | 76927     | -0,616248808 | 10,29549074 | 0,004614021 |
| A_51_P300506  | NM_183405    | Cox6b2        | 333182    | -0,616286169 | 10,37575926 | 0,068875458 |
| A_55_P2015375 | NM_009446    | Tuba3a        | 22144     | -0,617053259 | 11,35902778 | 0,005133677 |
| A_55_P2045278 | NR_033535    | Gm10845       | 100038734 | -0,61736089  | 13,71211111 | 0,006971495 |
| A_51_P145511  | NM_019991    | Prl2a1        | 56635     | -0,617513514 | 11,72738889 | 0,013155525 |
| A_51_P310949  | NM_008911    | Ppox          | 19044     | -0,617606518 | 10,48497222 | 0,006882274 |
| A_51_P289588  | NM_009454    | Ube2e3        | 22193     | -0,618488871 | 10,78525    | 0,003023602 |
| A_51_P398833  | NM_153154    | Tfap2d        | 226896    | -0,618572337 | 7,693722222 | 0,001085652 |
| A_55_P1953728 | NM_016701    | Nes           | 18008     | -0,619129571 | 8,896046296 | 0,00383222  |
| A_55_P2397854 | AK019540     | 4921518K17Rik | 78758     | -0,619947536 | 9,541074074 | 0,012074532 |
| A_55_P2149382 | NM_001123367 | Gm3448        | 100041639 | -0,620122417 | 9,792277778 | 0,003146305 |
| A_55_P1985313 | XM_001475212 | Gm2703        | 100040307 | -0,62013275  | 9,047064815 | 0,008337818 |
| A_55_P2319035 | BC051535     | AW011956      | 105332    | -0,620392687 | 7,849092593 | 0,003624938 |

|               |              |               |           |              |             |             |
|---------------|--------------|---------------|-----------|--------------|-------------|-------------|
| A_55_P2312783 | AK050884     | D030029J20Rik | 100502854 | -0,620550079 | 10,07392593 | 0,004307484 |
| A_55_P2077003 | NM_009973    | Csn1s2b       | 12992     | -0,620665342 | 10,76143519 | 0,031449067 |
| A_55_P2358399 | NR_033213    | 1700111N16Rik | 74305     | -0,62122337  | 8,967435185 | 0,003741298 |
| A_55_P2038362 | NM_145444    | Acot5         | 217698    | -0,622764706 | 7,817555556 | 0,050065815 |
| A_55_P2171993 | NM_028479    | Mrgbp         | 73247     | -0,622992051 | 7,90237037  | 0,000253645 |
| A_55_P2081840 | NM_001126338 | Prnd          | 26434     | -0,623015898 | 9,901148148 | 0,016278623 |
| A_55_P2045812 | NM_011014    | Sigmar1       | 18391     | -0,623189984 | 9,745675926 | 0,0609324   |
| A_52_P654752  | NM_029839    | Trub1         | 72133     | -0,623190779 | 10,03335185 | 0,003802124 |
| A_55_P1983368 | NM_001162533 | Sh3d21        | 66938     | -0,623294118 | 11,07772222 | 0,002907826 |
| A_55_P2032458 | XM_893730    | Gm6934        | 628919    | -0,624941176 | 8,408240741 | 4,42E-05    |
| A_55_P1997534 | NM_001101463 | Gm4871        | 231885    | -0,625992846 | 8,576990741 | 0,003157876 |
| A_55_P2045437 | NM_177629    | Fam216b       | 219170    | -0,626183625 | 7,221712963 | 0,000323679 |
| A_55_P2242089 | AK041796     | Cog5          | 238123    | -0,626562003 | 8,900953704 | 0,002232871 |
| A_66_P108685  | NM_009894    | Cideb         | 12684     | -0,626706677 | 9,230472222 | 0,054777381 |
| A_55_P2036605 | NM_021318    | Fhl5          | 57756     | -0,627329094 | 9,178222222 | 0,005846495 |
| A_55_P2225470 | AK039069     | A230092J17Rik | 320669    | -0,62772973  | 8,288888889 | 0,013531294 |
| A_51_P259879  | NM_173430    | Fkrp          | 243853    | -0,627845787 | 9,183074074 | 0,023198777 |
| A_51_P295034  | NM_010915    | Klk1b4        | 18048     | -0,628177266 | 8,720435185 | 0,005014815 |
| A_55_P1987953 | NM_001085534 | Gm5938        | 546335    | -0,628537361 | 9,19712963  | 0,007875388 |
| A_55_P2073915 | BC083183     | Nos1          | 18125     | -0,62913911  | 10,08880556 | 0,008011664 |
| A_55_P2080598 | NR_033355    | 5430416O09Rik | 71406     | -0,62918601  | 7,785185185 | 0,026581572 |
| A_55_P2001334 | AK036897     | Gpr31b        | 436440    | -0,629243243 | 10,30185185 | 0,012102512 |
| A_55_P2089840 | NM_001136070 | Eif2d         | 16865     | -0,629349762 | 8,589425926 | 0,001286375 |
| A_55_P2126950 | NM_001085417 | Zfp467        | 68910     | -0,629662957 | 9,230740741 | 0,010532809 |
| A_55_P1997554 | NM_080466    | Kcnn3         | 140493    | -0,630666932 | 9,380435185 | 0,007398508 |
| A_55_P1986630 | XM_001477989 | Gm3627        | 100042018 | -0,631391892 | 8,70587963  | 0,003293776 |
| A_55_P2216996 | NM_001110497 | Tmem87a       | 211499    | -0,631438792 | 10,77025926 | 0,008847503 |
| A_51_P312846  | NM_023605    | Fbxo9         | 71538     | -0,632114467 | 11,6537963  | 0,007398305 |
| A_55_P2153990 | NM_001177439 | Tldc2         | 383766    | -0,632538951 | 8,863240741 | 0,00305434  |
| A_52_P352735  | NM_001081369 | Ccdc153       | 270150    | -0,633272655 | 7,11462037  | 0,000407581 |
| A_55_P2082929 | NM_010389    | H2-Ob         | 15002     | -0,63381558  | 8,198777778 | 0,000204983 |
| A_55_P2168014 | NM_145404    | Prmt7         | 214572    | -0,634331479 | 7,799953704 | 0,001252066 |
| A_51_P317433  | NM_008589    | Mesp2         | 17293     | -0,6346407   | 11,98838889 | 0,010872818 |
| A_55_P1953093 | NM_148917    | Pabpc4        | 230721    | -0,634708267 | 9,722842593 | 0,001785206 |
| A_55_P2186615 | NM_001110239 | Acp1          | 11431     | -0,635361685 | 8,759953704 | 0,023037136 |
| A_55_P2044385 | NM_028263    | Fgfbp3        | 72514     | -0,635647059 | 10,04411111 | 0,024758544 |
| A_51_P168613  | NM_001004363 | Nuak1         | 77976     | -0,635809221 | 8,853       | 0,004551155 |
| A_55_P1958697 | NM_028234    | Rbm33         | 381626    | -0,636260731 | 9,255425926 | 0,001448842 |
| A_55_P2258832 | AK030345     | 5230400M03Rik | 100502767 | -0,636418919 | 9,138935185 | 0,010809111 |
| A_66_P130916  | NM_010389    | H2-Ob         | 15002     | -0,636962639 | 7,892268519 | 0,014898264 |
| A_55_P2043862 | NM_019641    | Stmn1         | 16765     | -0,637209062 | 10,12130556 | 0,002494232 |
| A_55_P2070239 | NM_016703    | Preb          | 50907     | -0,63727345  | 10,09505556 | 0,001259813 |
| A_55_P1971734 | NM_016678    | Reck          | 53614     | -0,637964229 | 7,693935185 | 0,001847059 |
| A_55_P2002376 | NM_009272    | Srm           | 20810     | -0,639000795 | 9,760842593 | 0,002277301 |
| A_55_P2039429 | NM_007860    | Dio1          | 13370     | -0,640709062 | 9,451407407 | 0,005332245 |
| A_51_P322273  | NM_008975    | Ptp4a3        | 19245     | -0,640771065 | 12,47512963 | 0,021595168 |
| A_55_P2043833 | NM_001081011 | Srgap2        | 14270     | -0,641422099 | 11,93421296 | 0,005213924 |
| A_55_P2157260 | NR_033225    | Gm13375       | 433408    | -0,643792528 | 9,330824074 | 0,00245032  |
| A_55_P1996998 | NM_009089    | Polr2a        | 20020     | -0,643809221 | 11,69501852 | 0,004954804 |
| A_55_P2009066 | NM_001166029 | Cfap74        | 544678    | -0,644777424 | 13,2772963  | 0,006802355 |
| A_55_P2183288 | NM_133679    | Cryzl1        | 66609     | -0,644900636 | 9,688064815 | 0,007558561 |



|               |              |               |           |              |              |             |
|---------------|--------------|---------------|-----------|--------------|--------------|-------------|
| A_55_P2158384 | NM_009591    | Aanat         | 11298     | -0,645116057 | 10,73074074  | 0,003445247 |
| A_52_P24631   | NM_018745    | Azin1         | 54375     | -0,646187599 | 8,446888889  | 0,004509031 |
| A_55_P2070054 | NM_030702    | Senp3         | 80886     | -0,647537361 | 11,461111111 | 0,000625156 |
| A_52_P522977  | NM_024272    | Ssbp2         | 66970     | -0,64768283  | 10,56630556  | 0,019889339 |
| A_51_P483473  | NM_011375    | St3gal5       | 20454     | -0,648032591 | 12,04221296  | 0,034083659 |
| A_52_P276935  | NM_001037940 | Dnajb6        | 23950     | -0,648676471 | 10,07071296  | 0,003860866 |
| A_51_P358112  | NM_146094    | Fads1         | 76267     | -0,648793323 | 8,204574074  | 0,017915921 |
| A_55_P2374197 | AK035904     | Spag17os      | 320613    | -0,651792528 | 8,507842593  | 0,014452702 |
| A_66_P135700  | NM_001104531 | Cyp2d11       | 545123    | -0,653255962 | 11,18822222  | 0,003766676 |
| A_55_P2003592 | BC059910     | Unkl          | 74154     | -0,654434817 | 8,47262037   | 0,006701804 |
| A_55_P2108389 | NM_177135    | D830030K20Rik | 320333    | -0,657051669 | 9,271768519  | 0,009474022 |
| A_55_P1993728 | NM_001161627 | Tmem116       | 77462     | -0,657097774 | 10,51747222  | 0,019603633 |
| A_51_P122035  | NM_153578    | Nipa1         | 233280    | -0,657281399 | 7,583611111  | 0,001039262 |
| A_52_P67212   | NR_015605    | 2900052N01Rik | 73040     | -0,658387122 | 11,39432407  | 0,030662673 |
| A_51_P343323  | NM_053071    | Cox6c         | 12864     | -0,658586645 | 12,24298148  | 0,000156048 |
| A_55_P1964348 | NM_023608    | Gdpd2         | 71584     | -0,659508744 | 13,00255556  | 0,025773039 |
| A_55_P2083988 | NM_008505    | Lmo2          | 16909     | -0,660031797 | 11,09181481  | 0,000685911 |
| A_55_P2108943 | NM_009835    | Ccr6          | 12458     | -0,661036566 | 7,923685185  | 8,70E-05    |
| A_66_P104296  | NM_028275    | 1700112E06Rik | 76633     | -0,661761526 | 7,12512963   | 0,000298411 |
| A_51_P198675  | NM_138951    | Ttc36         | 192653    | -0,662228935 | 7,120574074  | 0,000547558 |
| A_51_P230507  | NM_138953    | Ell2          | 192657    | -0,662513514 | 9,000055556  | 0,01030317  |
| A_55_P2014531 | NM_033041    | Hes7          | 84653     | -0,662942766 | 8,942055556  | 0,001740091 |
| A_55_P2061796 | AK007238     | 1700122H20Rik | 73617     | -0,663669316 | 8,783851852  | 0,002624825 |
| A_55_P2036788 | NR_004444    | Zfhx2os       | 432855    | -0,663949126 | 11,31277778  | 0,004802285 |
| A_55_P2384009 | C81489       | C81489        | 97547     | -0,665306836 | 11,09275926  | 0,03180474  |
| A_55_P2105970 | NM_001122668 | E330014E10Rik | 665943    | -0,666180445 | 8,197101852  | 0,000484938 |
| A_51_P172251  | NM_025903    | lfrd2         | 15983     | -0,666186804 | 9,209009259  | 0,01538586  |
| A_55_P1959091 | NM_031193    | Ren2          | 19702     | -0,668117647 | 10,32683333  | 0,002561984 |
| A_55_P1957729 | NM_139219    | Defb9         | 246079    | -0,668843402 | 8,639953704  | 0,001518122 |
| A_55_P2050508 | NM_011465    | Spta1         | 20739     | -0,669299682 | 9,695935185  | 0,01157741  |
| A_55_P1953402 | NM_029993    | Mlana         | 77836     | -0,670503975 | 10,03446296  | 0,00262999  |
| A_66_P124136  | AK039088     | Prkx          | 19108     | -0,671294118 | 11,11683333  | 0,00330856  |
| A_55_P2059680 | NM_001127354 | Gm11938       | 100041412 | -0,67145628  | 11,72972222  | 0,014898264 |
| A_55_P2076303 | NM_027920    | March8        | 71779     | -0,672083466 | 10,25852778  | 0,006834381 |
| A_55_P2053309 | XM_889451    | Rgs21         | 624910    | -0,672586645 | 7,959888889  | 0,001137249 |
| A_51_P481920  | NM_009828    | Ccna2         | 12428     | -0,673542925 | 8,680527778  | 0,016080351 |
| A_55_P1960053 | NM_001042489 | Hvcn1         | 74096     | -0,674647854 | 8,843564815  | 0,00023187  |
| A_55_P1970062 | NM_001033323 | Igsf9b        | 235086    | -0,675347377 | 9,95737963   | 0,014933372 |
| A_55_P2032024 | NM_001081252 | Uggt2         | 66435     | -0,675442766 | 9,761490741  | 0,005931344 |
| A_55_P2024909 | NM_001167746 | Dnah17        | 69926     | -0,675856916 | 11,57464815  | 0,0090958   |
| A_51_P421303  | NM_026769    | Caly          | 68566     | -0,676246423 | 9,230351852  | 0,001410514 |
| A_55_P2128821 | NM_019979    | Selk          | 80795     | -0,678806836 | 11,90200926  | 1,12E-06    |
| A_51_P151835  | NM_001110013 | Tmtc3         | 237500    | -0,680317965 | 8,399444444  | 0,001300749 |
| A_55_P2013188 | NM_001037940 | Dnajb6        | 23950     | -0,681724165 | 10,20115741  | 0,002241875 |
| A_55_P2009146 | NM_032544    | Gtpbp3        | 70359     | -0,682509539 | 10,68347222  | 0,048117198 |
| A_52_P125350  | NM_023210    | Anp32e        | 66471     | -0,682756757 | 8,415185185  | 0,000675735 |
| A_55_P1957911 | AK004063     | Tom1          | 21968     | -0,682922099 | 11,03677778  | 0,026341207 |
| A_51_P128575  | NM_011681    | Scgb1a1       | 22287     | -0,684848967 | 8,240722222  | 0,001472733 |
| A_55_P2331804 | AK139027     | AU015791      | 104932    | -0,685131161 | 7,040175926  | 0,00504124  |
| A_51_P501069  | NM_011465    | Spta1         | 20739     | -0,685717806 | 9,521509259  | 0,024059204 |
| A_55_P2020080 | XM_001479627 | Gm4326        | 100043267 | -0,686375199 | 9,509        | 0,001270787 |

|               |              |               |           |              |             |             |
|---------------|--------------|---------------|-----------|--------------|-------------|-------------|
| A_55_P2185526 | XM_001002582 | 1700016P03Rik | 668604    | -0,687259141 | 12,10262963 | 0,008101024 |
| A_55_P2129057 | XM_912516    | Gm7193        | 636947    | -0,687399046 | 10,56959259 | 0,024281086 |
| A_52_P608132  | NM_001024560 | Snx32         | 225861    | -0,688027822 | 9,42725     | 0,001592419 |
| A_55_P2015143 | NM_144881    | Hhat          | 226861    | -0,690764706 | 9,961962963 | 0,012958333 |
| A_52_P229972  | NM_009202    | Slc22a1       | 20517     | -0,691445151 | 9,427555556 | 0,001622475 |
| A_55_P1970159 | NM_013876    | Rnf11         | 29864     | -0,693023847 | 12,22894444 | 0,002346228 |
| A_55_P2026370 | NM_027946    | Dcaf7         | 71833     | -0,693249603 | 9,185407407 | 0,003538804 |
| A_55_P2006698 | NR_033241    | Bmp1          | 12153     | -0,694383148 | 9,483277778 | 0,009810966 |
| A_55_P2166123 | NM_015731    | Atp9a         | 11981     | -0,697397456 | 11,57788889 | 0,007237909 |
| A_55_P2005248 | NM_008627    | Meis3         | 17537     | -0,697608903 | 11,21318519 | 0,030999623 |
| A_55_P1964245 | NM_146959    | Olfr631       | 258961    | -0,698110493 | 9,582694444 | 0,005492418 |
| A_55_P1987231 | NM_026928    | Fuom          | 69064     | -0,701972973 | 10,14801852 | 0,006154498 |
| A_55_P2179309 | NM_001122596 | A630033H20Rik | 213438    | -0,701997615 | 11,21047222 | 0,020956733 |
| A_51_P155152  | NM_020332    | Ank           | 11732     | -0,702066773 | 8,880777778 | 0,006823724 |
| A_55_P1980041 | NM_008468    | Kpna6         | 16650     | -0,705976948 | 10,99915741 | 0,027037886 |
| A_55_P2091985 | NM_177366    | Gpr157        | 269604    | -0,707786963 | 12,70374074 | 0,056149499 |
| A_51_P221632  | NM_026091    | 1700037H04Rik | 67326     | -0,70790938  | 11,83083333 | 0,007363429 |
| A_51_P351860  | NM_009777    | C1qb          | 12260     | -0,70904849  | 9,095935185 | 0,006883091 |
| A_55_P2060402 | NM_153419    | Grwd1         | 101612    | -0,709131955 | 10,58490741 | 0,003323375 |
| A_55_P2058871 | NM_138604    | Otud5         | 54644     | -0,710103339 | 11,95538889 | 6,75E-05    |
| A_55_P2154536 | NM_001159626 | Hagh          | 14651     | -0,711695548 | 12,90276852 | 0,003976165 |
| A_55_P2048518 | NM_009569    | Zfpm1         | 22761     | -0,715267886 | 9,52337963  | 1,07E-05    |
| A_55_P1993473 | NM_001081657 | Gm5935        | 546282    | -0,715829889 | 11,77125926 | 0,010765861 |
| A_55_P2060330 | NM_199145    | 3110062M04Rik | 78412     | -0,717470588 | 11,70087037 | 0,0064703   |
| A_55_P2145029 | NM_001033411 | Gm826         | 329554    | -0,718340223 | 10,22933333 | 0,010408285 |
| A_55_P2145449 | NM_172260    | Cep68         | 216543    | -0,718541335 | 7,726842593 | 0,000213844 |
| A_51_P156631  | NM_028419    | Glrx5         | 73046     | -0,718682035 | 14,18698148 | 0,005976878 |
| A_55_P2067798 | NM_207543    | Vmn1r59       | 404284    | -0,719608108 | 9,852935185 | 0,003206829 |
| A_55_P1968643 | NM_001166718 | Vmn1r173      | 545934    | -0,719822734 | 10,23193519 | 0,005833146 |
| A_55_P2100973 | NM_016851    | Irf6          | 54139     | -0,720701908 | 11,31400926 | 0,007578378 |
| A_51_P417891  | NM_011280    | Trim10        | 19824     | -0,727824324 | 10,28530556 | 0,050212413 |
| A_55_P2010641 | NM_172479    | Slc38a5       | 209837    | -0,728219396 | 11,58624074 | 0,000373804 |
| A_55_P1963549 | NM_001166842 | Vmn1r168      | 100043101 | -0,729899841 | 11,71764815 | 0,002655001 |
| A_55_P1994887 | NM_009569    | Zfpm1         | 22761     | -0,73036089  | 9,592685185 | 3,31E-06    |
| A_55_P2026639 | NM_001100614 | Gm11564       | 670496    | -0,730539746 | 7,473268519 | 0,002029433 |
| A_55_P2104071 | NM_001012307 | Defa23        | 497114    | -0,734337838 | 11,25834259 | 0,005193884 |
| A_55_P1970120 | NM_146168    | Vopp1         | 232023    | -0,736702703 | 12,89322222 | 0,003952076 |
| A_55_P2020326 | NM_013591    | Madcam1       | 17123     | -0,739155803 | 11,08812963 | 0,010714306 |
| A_55_P2113439 | NM_021371    | Caln1         | 140904    | -0,7398593   | 10,78182407 | 0,004541317 |
| A_51_P294643  | NM_007672    | Cdr2          | 12585     | -0,740596184 | 12,32940741 | 0,01446503  |
| A_51_P498772  | NM_144953    | 1700019D03Rik | 67080     | -0,742526232 | 9,658055556 | 0,004321648 |
| A_66_P136102  | NM_177099    | Lefty2        | 320202    | -0,742567568 | 9,563703704 | 0,002628409 |
| A_55_P2166069 | NM_027173    | 2310079G19Rik | 69699     | -0,745355326 | 11,43617593 | 0,004481419 |
| A_51_P432851  | NM_177564    | Dhrs11        | 192970    | -0,746661367 | 10,11122222 | 0,030203936 |
| A_51_P151020  | NM_009407    | Tnp1          | 21958     | -0,746802067 | 8,786361111 | 0,000881161 |
| A_51_P455647  | NM_009801    | Car2          | 12349     | -0,746819555 | 11,71223148 | 0,092425887 |
| A_51_P433388  | NM_027070    | 1700019A02Rik | 69397     | -0,747201113 | 10,10267593 | 0,016189315 |
| A_55_P1959985 | NM_020559    | Alas1         | 11655     | -0,7485469   | 10,45751852 | 0,003503703 |
| A_51_P520857  | NR_004857    | Gm12060       | 100134990 | -0,750143084 | 11,08877778 | 2,53E-07    |
| A_55_P2094049 | AK139096     | Gm15800       | 269700    | -0,750666932 | 9,139712963 | 0,000901055 |
| A_51_P504815  | NM_025288    | Stfa3         | 20863     | -0,751536566 | 11,63617593 | 0,004480311 |

|               |              |               |           |              |             |             |
|---------------|--------------|---------------|-----------|--------------|-------------|-------------|
| A_55_P2396446 | AI593498     | Dusp8         | 18218     | -0,75172655  | 9,719722222 | 0,083690033 |
| A_55_P2018111 | NM_001101479 | Pabpc4l       | 241989    | -0,753807631 | 8,801296296 | 0,00231264  |
| A_55_P1972590 | NM_173396    | Tgif2         | 228839    | -0,756542925 | 9,696657407 | 0,00319152  |
| A_66_P111534  | AK017368     | 5430431A17Rik | 71368     | -0,757101749 | 8,093333333 | 0,079428237 |
| A_55_P2004208 | NM_007847    | Defa-rs2      | 13222     | -0,757279809 | 8,673740741 | 0,036658587 |
| A_51_P269084  | NM_175329    | Chchd10       | 103172    | -0,7580938   | 11,10838889 | 1,06E-05    |
| A_55_P1969152 | NM_030735    | Vmn1r172      | 81010     | -0,759391097 | 8,636       | 0,001152229 |
| A_55_P2105140 | NM_001177731 | Mrap2         | 244958    | -0,76108744  | 8,776925926 | 0,00122535  |
| A_55_P2087622 | NM_010215    | Il4i1         | 14204     | -0,761750397 | 7,956148148 | 6,52E-05    |
| A_51_P291819  | NM_024210    | 2310033P09Rik | 67862     | -0,761986486 | 10,87939815 | 0,0012484   |
| A_55_P2154982 | NM_009858    | Cd8b1         | 12526     | -0,763934817 | 11,25159259 | 0,000211724 |
| A_51_P451151  | NM_026785    | Ube2c         | 68612     | -0,763943561 | 12,27952778 | 0,009242518 |
| A_55_P2138422 | NM_027802    | Obox1         | 71468     | -0,765930048 | 11,88516667 | 0,020174525 |
| A_55_P2052719 | NM_001085410 | Nadk2         | 68646     | -0,767990461 | 9,871166667 | 0,002137252 |
| A_55_P2023562 | NM_199225    | Cd300c        | 387565    | -0,770017488 | 9,909277778 | 0,000902081 |
| A_55_P2167123 | NR_033575    | Cyp4b1-ps2    | 631037    | -0,770081081 | 10,15885185 | 0,010487294 |
| A_55_P2080756 | NM_001011749 | Olfr704       | 257902    | -0,78422337  | 11,95475    | 0,015578458 |
| A_51_P103975  | NM_027430    | Mpc2          | 70456     | -0,785816375 | 10,42530556 | 0,008011337 |
| A_55_P2091323 | NM_145514    | Wdr26         | 226757    | -0,786388712 | 8,239972222 | 0,00057415  |
| A_55_P1961127 | NR_001592    | H19           | 14955     | -0,789143084 | 10,97205556 | 0,007827823 |
| A_55_P2081405 | BC066226     | BC052688      | 432812    | -0,78986089  | 10,43841667 | 1,68E-07    |
| A_66_P111449  | AK142058     | 1700018A04Rik | 71307     | -0,791578696 | 10,33059259 | 0,003097471 |
| A_55_P2021953 | NM_146600    | Olfr700       | 258593    | -0,792252782 | 11,71727778 | 0,00701332  |
| A_52_P414420  | NM_033623    | Dcun1d1       | 114893    | -0,793383148 | 10,12344444 | 0,002717515 |
| A_55_P2014570 | NM_001164581 | Zfp961        | 234413    | -0,802374404 | 10,79334259 | 0,002028946 |
| A_51_P496432  | NM_007981    | Acsl1         | 14081     | -0,803787758 | 11,03563889 | 0,006882551 |
| A_52_P354373  | AK012387     | 1190002F15Rik | 381822    | -0,80436725  | 9,080888889 | 0,035573624 |
| A_55_P1996941 | NM_026785    | Ube2c         | 68612     | -0,809759936 | 11,51637037 | 0,005212352 |
| A_66_P115406  | NM_008774    | Pabpc1        | 18458     | -0,816570747 | 16,0467037  | 1,60E-05    |
| A_51_P147034  | NM_027407    | Ica1l         | 70375     | -0,819669316 | 9,851462963 | 0,087129595 |
| A_55_P1960566 | NM_139117    | Ybx3          | 56449     | -0,823790143 | 14,47096296 | 0,000760097 |
| A_51_P154585  | NM_134223    | Vmn1r195      | 171257    | -0,828693164 | 12,17157407 | 0,002294028 |
| A_55_P2097393 | NM_026132    | Txndc8        | 67402     | -0,836240859 | 10,12049074 | 0,00380138  |
| A_55_P2099785 | NM_027604    | Usp15         | 14479     | -0,840381558 | 10,89788889 | 0,001600569 |
| A_51_P435251  | NM_146207    | Cul4a         | 99375     | -0,840935612 | 9,727509259 | 0,001613565 |
| A_55_P2051455 | NM_178882    | D2hgdh        | 98314     | -0,854957075 | 9,596666667 | 0,013186686 |
| A_66_P122155  | NM_145514    | Wdr26         | 226757    | -0,858822734 | 10,54619444 | 0,000531916 |
| A_52_P637730  | NM_145405    | Ubl4          | 27643     | -0,860864865 | 9,326148148 | 1,52E-05    |
| A_55_P2151855 | NM_001110239 | Acp1          | 11431     | -0,868923688 | 10,16668519 | 0,006165157 |
| A_55_P2161347 | NM_001033041 | Acmsd         | 266645    | -0,889591415 | 7,798759259 | 9,28E-05    |
| A_55_P2142668 | XM_001480974 | Gm4653        | 100043795 | -0,895435612 | 10,79716667 | 0,069855444 |
| A_55_P2073709 | NM_178667    | Tfdp2         | 211586    | -0,896669316 | 12,4357037  | 0,001457678 |
| A_51_P466591  | AK005436     | 1600012P17Rik | 72025     | -0,903759141 | 11,13728704 | 0,003104604 |
| A_52_P660945  | NM_019861    | Ctsf          | 56464     | -0,909717011 | 9,366851852 | 0,003435587 |
| A_55_P2178510 | NM_008561    | Mc3r          | 17201     | -0,910364865 | 9,892731481 | 0,087125515 |
| A_51_P376347  | NM_013546    | Hebp1         | 15199     | -0,928251192 | 10,18724074 | 0,005022783 |
| A_55_P2175579 | NM_146694    | Olfr1466      | 258689    | -0,930243243 | 11,98911111 | 0,066843614 |
| A_55_P1974587 | NM_177545    | Vangl1        | 229658    | -0,949236089 | 8,563509259 | 0,000482223 |
| A_51_P205968  | NM_026912    | Snx15         | 69024     | -0,972065183 | 10,42092593 | 0,005399744 |
| A_55_P2085546 | NM_021422    | Dnaja4        | 58233     | -0,988234499 | 11,49193519 | 0,000212585 |
| A_52_P612382  | NM_023117    | Cdc25b        | 12531     | -0,989111288 | 12,48548148 | 0,005253016 |

|               |           |               |        |              |             |             |
|---------------|-----------|---------------|--------|--------------|-------------|-------------|
| A_55_P1957168 | NM_133777 | Ube2s         | 77891  | -1,010892687 | 10,78652778 | 4,78E-05    |
| A_55_P2117630 | NM_030093 | Snrnp25       | 78372  | -1,049064388 | 9,505490741 | 6,89E-06    |
| A_51_P329370  | NM_030093 | Snrnp25       | 78372  | -1,053204293 | 11,20371296 | 2,83E-06    |
| A_55_P2036813 | NM_030082 | Hist3h2ba     | 78303  | -1,053439587 | 8,491287037 | 3,88E-05    |
| A_55_P2043682 | BC021811  | Ubac1         | 98766  | -1,077646264 | 12,10008333 | 0,000784235 |
| A_55_P2043684 | NM_133835 | Ubac1         | 98766  | -1,086734499 | 12,40544444 | 0,000617006 |
| A_55_P2410875 | AK034163  | C030037D09Rik | 193280 | -1,109784579 | 8,506268519 | 0,003950051 |
| A_52_P449417  | NM_177545 | Vangl1        | 229658 | -1,252853736 | 8,536092593 | 1,32E-06    |
