# Supplementary material for: Of mice and men: the host response to influenza virus infection
Source: PubMed Central journal article supplement (PMC6132725; doi:10.1007/s00335-018-9750-y), 2018-06-15
Supplement: 335_2018_9750_MOESM8_ESM.pdf [file 335_2018_9750_MOESM8_ESM.pdf]

| ID          | GB_ACC    | Gene.Symbol       | ENTREZ_GENE_ID     | logFC  | AveExpr     | adj.P.Val   |             |
|-------------|-----------|-------------------|--------------------|--------|-------------|-------------|-------------|
| 202411_at   | NM_005532 | IFI27             |                    | 3429   | 3,416836825 | 8,150112117 | 0,008481459 |
| 213797_at   | A1337069  | RSAD2             |                    | 91543  | 3,11434895  | 10,24745338 | 0,000548902 |
| 219519_s_at | NM_023068 | SIGLEC1           |                    | 6614   | 3,101833575 | 7,97324445  | 0,001166055 |
| 216598_s_at | S69738    | CCL2              |                    | 6347   | 3,088349425 | 4,258964367 | 0,009598804 |
| 203153_at   | NM_001548 | IFIT1             |                    | 3434   | 3,059099125 | 10,10652852 | 0,000511411 |
| 204439_at   | NM_006820 | IFI44L            |                    | 10964  | 2,91706445  | 10,72298278 | 0,00067711  |
| 214453_s_at | NM_006417 | IFI44             |                    | 10561  | 2,6899689   | 9,43015445  | 0,000548902 |
| 205483_s_at | NM_005101 | ISG15             |                    | 9636   | 2,514738625 | 11,75364757 | 0,000548902 |
| 219863_at   | NM_016323 | HERC5             |                    | 51191  | 2,395255475 | 10,74451798 | 0,000548902 |
| 214038_at   | A1984980  | CCL8              |                    | 6355   | 2,370504075 | 5,49217275  | 0,028369807 |
| 204747_at   | NM_001549 | IFIT3             |                    | 3437   | 2,347163375 | 11,59648473 | 0,000511411 |
| 219211_at   | NM_017414 | USP18             |                    | 11274  | 2,338219175 | 8,376424283 | 0,002352192 |
| 205569_at   | NM_014398 | LAMP3             |                    | 27074  | 2,31282425  | 8,076373733 | 0,002036716 |
| 200986_at   | NM_000062 | SERPING1          |                    | 710    | 2,304107198 | 9,590013849 | 0,001221931 |
| 44673_at    | N53555    | SIGLEC1           |                    | 6614   | 2,2913736   | 8,59181705  | 0,001166055 |
| 214059_at   | BE049439  | IFI44             |                    | 10561  | 2,2304782   | 9,289810767 | 0,001218806 |
| 205660_at   | NM_003733 | OASL              |                    | 8638   | 2,195440475 | 10,17883643 | 0,001591348 |
| 219895_at   | NM_017938 | FAM70A            |                    | 55026  | 2,152981085 | 5,255091088 | 0,00642036  |
| 204533_at   | NM_001565 | CXCL10            |                    | 3627   | 2,128379275 | 6,289347767 | 0,010413123 |
| 218400_at   | NM_006187 | OAS3              |                    | 4940   | 2,089504375 | 10,71898337 | 0,001609385 |
| 219364_at   | NM_024119 | DHX58             |                    | 79132  | 2,050524575 | 7,772215433 | 0,003567845 |
| 222154_s_at | AK002064  | SPATS2L           |                    | 26010  | 2,045642975 | 8,906082633 | 0,001862144 |
| 204415_at   | NM_022873 | IFI6              |                    | 2537   | 2,01578665  | 8,911632217 | 0,00166876  |
| 205552_s_at | NM_002534 | OAS1              |                    | 4938   | 2,00067055  | 10,30232257 | 0,001812051 |
| 202869_at   | NM_016816 | OAS1              |                    | 4938   | 1,9880394   | 11,0382415  | 0,001591348 |
| 219684_at   | NM_022147 | RTP4              |                    | 64108  | 1,839691725 | 8,9973835   | 0,000548902 |
| 202086_at   | NM_002462 | MX1               |                    | 4599   | 1,83571475  | 12,38766333 | 0,001225711 |
| 202145_at   | NM_002346 | LY6E              |                    | 4061   | 1,833352575 | 11,26279775 | 0,002368417 |
| 209999_x_at | AB005043  | SOCS1             |                    | 8651   | 1,8231806   | 5,637261433 | 0,026411531 |
| 211267_at   | U82811    | HESX1             |                    | 8820   | 1,815933475 | 4,252610267 | 0,028369807 |
| 210657_s_at | U88870    |                   | Sep 04             | 5414   | 1,8111847   | 6,318408467 | 0,007400283 |
| 215495_s_at | AL117523  | SAMD4A            |                    | 23034  | 1,79468305  | 5,873432567 | 0,013287356 |
| 217502_at   | BE888744  | IFIT2             |                    | 3433   | 1,771319575 | 10,83291507 | 0,003596228 |
| 204972_at   | NM_016817 | OAS2              |                    | 4939   | 1,7692661   | 11,27776178 | 0,000967121 |
| 210797_s_at | AF063612  | OASL              |                    | 8638   | 1,757560875 | 10,3505182  | 0,001899777 |
| 203595_s_at | N47725    | IFIT5             |                    | 24138  | 1,726594    | 9,036730267 | 0,000548902 |
| 212845_at   | AB028976  | SAMD4A            |                    | 23034  | 1,699512025 | 7,597603567 | 0,000548902 |
| 218943_s_at | NM_014314 | DDX58             |                    | 23586  | 1,6574062   | 9,426587017 | 0,00166876  |
| 202430_s_at | NM_021105 | PLSCR1            |                    | 5359   | 1,633638675 | 10,32412415 | 0,000548902 |
| 208087_s_at | NM_030776 | ZBP1              |                    | 81030  | 1,614758    | 8,270658533 | 0,002284833 |
| 206461_x_at | NM_005951 | MT1H              |                    | 4496   | 1,595310275 | 9,839666883 | 0,008745686 |
| 210362_x_at | AF230409  | PML               |                    | 5371   | 1,58779655  | 6,536435883 | 0,009041178 |
| 218986_s_at | NM_017631 | DDX60             |                    | 55601  | 1,576774925 | 9,517636683 | 0,001042023 |
| 202672_s_at | NM_001674 | ATF3              |                    | 467    | 1,575506025 | 7,04936455  | 0,01767391  |
| 211165_x_at | D31661    | EPHB2             |                    | 2048   | 1,54628275  | 3,822508417 | 0,020432649 |
| 203596_s_at | NM_012420 | IFIT5             |                    | 24138  | 1,543839475 | 8,273881767 | 0,00406341  |
| 202270_at   | NM_002053 | GBP1              |                    | 2633   | 1,52937355  | 11,20040657 | 0,001049801 |
| 212185_x_at | NM_005953 | MT2A              |                    | 4502   | 1,508759525 | 11,40996353 | 0,006906823 |
| 220492_s_at | NM_004802 | OTOF              |                    | 9381   | 1,507645325 | 3,536635733 | 0,059379919 |
| 206026_s_at | NM_007115 | TNFAIP6           |                    | 7130   | 1,507290425 | 8,934334233 | 0,006403497 |
| 202269_x_at | NM_002053 | GBP1              |                    | 2633   | 1,50159385  | 11,37396322 | 0,000548902 |
| 215617_at   | AU145711  | SPATS2L           |                    | 26010  | 1,497631835 | 4,606671588 | 0,031971642 |
| 208581_x_at | NM_005952 | MT1X              |                    | 4501   | 1,49501935  | 10,76977802 | 0,006224237 |
| 206133_at   | NM_017523 | XAF1              |                    | 54739  | 1,477197075 | 9,1116344   | 0,007979514 |
| 208436_s_at | NM_004030 | IRF7              |                    | 3665   | 1,472801125 | 11,30074707 | 0,001691049 |
| 219209_at   | NM_022168 | IFIH1             |                    | 64135  | 1,459335325 | 9,4908162   | 0,002284833 |
| 202446_s_at | A1825926  | PLSCR1            |                    | 5359   | 1,4547915   | 11,900317   | 0,000967121 |
| 219607_s_at | NM_024021 | MS4A4A            |                    | 51338  | 1,44819915  | 7,2556522   | 0,003060038 |
| 214511_x_at | L03419    | FCGR1B            |                    | 2210   | 1,43853385  | 10,11071977 | 0,001218806 |
| 221680_s_at | AF147782  | ETV7              |                    | 51513  | 1,438176475 | 7,678269617 | 0,004558106 |
| 209035_at   | M69148    | MDK               |                    | 4192   | 1,437419775 | 4,4655717   | 0,011126309 |
| 219352_at   | NM_017912 | HERC6             |                    | 55008  | 1,434361075 | 9,478887517 | 0,000965387 |
| 202687_s_at | NM_003810 | TNFSF10           |                    | 8743   | 1,4295577   | 10,49022747 | 0,002297425 |
| 217933_s_at | NM_015907 | LAP3              |                    | 51056  | 1,42159525  | 11,78747767 | 0,001218806 |
| 205899_at   | NM_003914 | CENNA1            |                    | 8900   | 1,41647865  | 4,97967405  | 0,006715891 |
| 211456_x_at | AF333388  | MT1P2             |                    | 645745 | 1,394409525 | 10,692073   | 0,010128636 |
| 201427_s_at | NM_005410 | SEPP1             |                    | 6414   | 1,387352477 | 3,178567306 | 0,009496312 |
| 202688_at   | NM_003810 | TNFSF10           |                    | 8743   | 1,37375335  | 11,58080297 | 0,001225711 |
| 210029_at   | M34455    | IDO1              |                    | 3620   | 1,355721525 | 7,94623065  | 0,013868327 |
| 209417_s_at | BC001356  | IFI35             |                    | 3430   | 1,3398      | 10,70526545 | 0,002425849 |
| 207500_at   | NM_004347 | CASP5             |                    | 838    | 1,33654785  | 7,89156385  | 0,010003105 |
| 216950_s_at | X14355    | FCGR1A /// FCGR1C | 100132417 /// 2209 |        | 1,32765825  | 9,8073919   | 0,00161738  |
| 210001_s_at | AB005043  | SOCS1             |                    | 8651   | 1,3207541   | 8,327655433 | 0,007382103 |
| 214329_x_at | AW474434  | TNFSF10           |                    | 8743   | 1,313591475 | 10,15529695 | 0,001812051 |
| 206025_s_at | AW188198  | TNFAIP6           |                    | 7130   | 1,312282025 | 9,507880283 | 0,014443822 |
| 210770_s_at | AF004884  | CACNA1A           |                    | 773    | 1,310188625 | 6,381108283 | 0,019945613 |
| 211012_s_at | BC000080  | GOLGA6L4 /// PML  | 161527 /// 5371    |        | 1,302972025 | 9,276021017 | 0,005125854 |
| 219691_at   | NM_017654 | SAMD9             |                    | 54809  | 1,2873197   | 8,075451633 | 0,003918023 |
| 222134_at   | AL050350  | DDO               |                    | 8528   | 1,27565825  | 4,711586183 | 0,007570229 |
| 202898_at   | NM_014654 | SDC3              |                    | 9672   | 1,262016    | 4,5201907   | 0,050894686 |
| 203773_x_at | NM_000712 | BLVRA             |                    | 644    | 1,25555055  | 9,5058766   | 0,000548902 |
| 210348_at   | AF176379  |                   | Sep 04             | 5414   | 1,255092825 | 4,0311013   | 0,063908795 |
| 206503_x_at | NM_002675 | PML               |                    | 5371   | 1,251318375 | 7,4615978   | 0,003620745 |
| 214770_at   | A1299239  | MSR1              |                    | 4481   | 1,234004193 | 4,060943662 | 0,080206237 |
| 219716_at   | NM_030641 | APOL6             |                    | 80830  | 1,2271798   | 8,565767367 | 0,003949509 |
| 219062_s_at | BE676543  | ZCCHC2            |                    | 54877  | 1,214266475 | 9,514472083 | 0,001609385 |
| 202087_s_at | NM_001912 | CTS1              |                    | 1514   | 1,211008775 | 7,591303133 | 0,000548902 |
| 202357_s_at | NM_001710 | CFB               |                    | 629    | 1,210598    | 4,406010433 | 0,026753924 |
| 58916_at    | A1672101  | KCTD14            |                    | 65987  | 1,204797523 | 4,583303698 | 0,07698209  |
| 203052_at   | NM_000063 | C2                |                    | 717    | 1,201821225 | 6,46140425  | 0,05418992  |
| 220722_s_at | AB043997  | SLCSA7            |                    | 60482  | 1,1971287   | 3,70830635  | 0,054634334 |
| 209640_at   | M79462    | PML               |                    | 5371   | 1,1908059   | 7,78375125  | 0,008901264 |
| 206715_at   | NM_012252 | TFEC              |                    | 22797  | 1,190180375 | 6,766375433 | 0,032073198 |
| 213294_at   | AV755522  | EIF2AK2           |                    | 5610   | 1,186925225 | 10,89583028 | 0,001265153 |
| 205875_s_at | NM_016381 | TREX1             |                    | 11277  | 1,182701575 | 9,892661167 | 0,004558106 |

|                             |           |                   |        |             |             |             |
|-----------------------------|-----------|-------------------|--------|-------------|-------------|-------------|
| 219545_at                   | NM_023930 | KCTD14            | 65987  | 1,177062625 | 3,825739767 | 0,081439893 |
| 206553_at                   | NM_002535 | OAS2              | 4939   | 1,169111975 | 8,466390983 | 0,004953048 |
| 211588_s_at                 | AF230401  | LOC652346 /// PML |        | 1,1661146   | 6,420401783 | 0,035127235 |
| 205241_at                   | NM_005138 | SCO2              | 9997   | 1,165379825 | 10,99413638 | 0,001218806 |
| 211599_x_at                 | U19348    | MET               | 4233   | 1,163155625 | 5,488199833 | 0,041293016 |
| 218543_s_at                 | NM_022750 | PARP12            | 64761  | 1,160922775 | 11,20398902 | 0,00166876  |
| 209498_at                   | X16354    | CEACAM1           | 634    | 1,15274815  | 9,662269317 | 0,00814378  |
| 216244_at                   | BE563442  | IL1RN             | 3557   | 1,15175471  | 2,294777243 | 0,083363532 |
| 211889_x_at                 | D12502    | CEACAM1           | 634    | 1,1501679   | 8,36609795  | 0,020331917 |
| 202953_at                   | NM_000491 | C1QB              | 713    | 1,147816    | 6,337800217 | 0,050253492 |
| 211729_x_at                 | BC005902  | BLVRA             | 644    | 1,147110175 | 9,792951967 | 0,000548902 |
| 201641_at                   | NM_004335 | BST2              | 684    | 1,147032625 | 10,54139162 | 0,001049801 |
| 218408_at                   | NM_012456 | TIMM10            | 26519  | 1,1251258   | 8,733760067 | 0,006117055 |
| 214926_at                   | AK026484  | SPTAN1            | 6709   | 1,11961135  | 4,410422317 | 0,019562161 |
| 201649_at                   | NM_004223 | UBE2L6            | 9246   | 1,118538    | 12,608918   | 0,000548902 |
| 200923_at                   | NM_005567 | LGALS3BP          | 3959   | 1,118491211 | 9,447323686 | 0,008850064 |
| 212659_s_at                 | AW083357  | IL1RN             | 3557   | 1,111587275 | 10,11195153 | 0,020981765 |
| 213293_s_at                 | AA083478  | TRIM22            | 10346  | 1,1078745   | 12,749676   | 0,000548902 |
| 219874_at                   | NM_024628 | SLC12A8           | 84561  | 1,106781775 | 3,955245317 | 0,059466598 |
| 210610_at                   | M69176    | CEACAM1           | 634    | 1,10504085  | 6,9308881   | 0,010413123 |
| 202837_at                   | NM_006700 | TRAFD1            | 10906  | 1,09726415  | 9,450469233 | 0,002284383 |
| 204211_x_at                 | NM_002759 | EIF2AK2           | 5610   | 1,0957219   | 9,618682267 | 0,003315563 |
| 205819_at                   | NM_006770 | MARCO             | 8685   | 1,0951732   | 7,081760767 | 0,043488053 |
| 210271_at                   | AB021742  | NEUROD2           | 4761   | 1,090808875 | 4,511727817 | 0,036389595 |
| 218435_at                   | NM_013238 | DNAJC15           | 29103  | 1,089238725 | 6,5268982   | 0,003206471 |
| 221915_s_at                 | A1221318  | RANBP1            | 5902   | 1,084135575 | 4,27756675  | 0,016235772 |
| 218232_at                   | NM_015991 | C1QA              | 712    | 1,0671311   | 6,205367433 | 0,080206237 |
| 211434_s_at                 | AF015524  | CCRL2             | 9034   | 1,0529066   | 7,023736133 | 0,011336596 |
| 208181_at                   | NM_003543 | HIST1H4H          | 8365   | 1,05217453  | 4,139788832 | 0,024574447 |
| 205837_s_at                 | BC005319  | GYP A             | 2993   | 1,040292775 | 4,188879067 | 0,098257507 |
| 209593_s_at                 | AF317129  | TOR1B             | 27348  | 1,03693285  | 10,21902782 | 0,006852044 |
| 205972_at                   | NM_006841 | SLC38A3           | 10991  | 1,032985825 | 3,780167667 | 0,032828665 |
| 204685_s_at                 | R52647    | ATP2B2            | 491    | 1,032302475 | 4,44430465  | 0,05418992  |
| 206513_at                   | NM_004833 | AIM2              | 9447   | 1,031107925 | 8,542884283 | 0,012052057 |
| 206740_x_at                 | NM_003176 | SYCP1             | 6847   | 1,028717475 | 3,8140612   | 0,049199065 |
| 201015_s_at                 | NM_021991 | JUP               | 3728   | 1,025934175 | 7,827481977 | 0,040423997 |
| 205043_at                   | NM_000492 | CFTR              | 1080   | 1,014754675 | 3,145647317 | 0,006224237 |
| 212657_s_at                 | AW083357  | IL1RN             | 3557   | 1,00675575  | 12,3739745  | 0,00470268  |
| 211883_x_at                 | M76742    | CEACAM1           | 634    | 1,006506575 | 8,980666283 | 0,014833716 |
| 208134_x_at                 | NM_031246 | PSG2              | 5670   | 1,0060405   | 3,735338867 | 0,032323922 |
| 213769_at                   | AA971768  | KSR1              | 8844   | 1,004883825 | 4,5659436   | 0,034223692 |
| 209969_s_at                 | BC002704  | STAT1             | 6772   | 1,00483375  | 11,49506817 | 0,000548902 |
| 217518_at                   | BF056029  | MYOF              | 26509  | 1,00149135  | 6,5726128   | 0,025341334 |
| 220146_at                   | NM_016562 | TLR7              | 51284  | 0,995492325 | 8,2387016   | 0,004558106 |
| 204162_at                   | NM_006101 | NDC80             | 10403  | 0,994530075 | 5,44087505  | 0,021325436 |
| 204043_at                   | NM_000355 | TCN2              | 6948   | 0,994170275 | 7,885097383 | 0,010579198 |
| 208912_s_at                 | BC001362  | CNP               | 1267   | 0,986270275 | 9,800946917 | 0,003181381 |
| 209369_at                   | M63310    | ANXA3             | 306    | 0,985065475 | 7,880192717 | 0,036826869 |
| 220194_at                   | NM_024677 | NSUN7             | 79730  | 0,9824225   | 3,834047483 | 0,031971642 |
| 214633_at                   | A1824954  | SOX3              | 6658   | 0,981668393 | 2,867495685 | 0,082254268 |
| 204224_s_at                 | NM_000161 | GCH1              | 2643   | 0,977649    | 11,295742   | 0,001221931 |
| 208373_s_at                 | NM_004154 | P2RY6             | 5031   | 0,97243145  | 5,594868583 | 0,065219861 |
| 220752_at                   | NM_016158 | LOC51145          | 51145  | 0,968999225 | 3,934855583 | 0,034223692 |
| 221766_s_at                 | AW246673  | FAM46A            | 55603  | 0,9685991   | 11,38651963 | 0,001428731 |
| 209568_s_at                 | AF186779  | RGL1              | 23179  | 0,96713425  | 7,537547017 | 0,006467195 |
| 217165_x_at                 | M10943    | MT1F              | 4494   | 0,96568245  | 9,4034437   | 0,006403497 |
| 221881_s_at                 | A1638420  | CLIC4             | 25932  | 0,96510895  | 5,761753417 | 0,025177258 |
| 214727_at                   | X95152    | BRCA2             | 675    | 0,95972642  | 4,913573893 | 0,024948337 |
| 216243_s_at                 | BE563442  | IL1RN             | 3557   | 0,95591685  | 10,6107239  | 0,032831098 |
| 205907_s_at                 | A1765819  | OMD               | 4958   | 0,95479504  | 3,647508962 | 0,097852925 |
| 206576_s_at                 | NM_001712 | CEACAM1           | 634    | 0,954099    | 7,8428758   | 0,051441534 |
| 209546_s_at                 | AF323540  | APOL1             | 8542   | 0,94932795  | 8,6601782   | 0,012344091 |
| 202620_s_at                 | NM_000935 | PLOD2             | 5352   | 0,94737375  | 3,8741972   | 0,046511359 |
| AFFX-HUMISGF3A/M97935_MA_at | STAT1     |                   | 6772   | 0,94331025  | 8,90835265  | 0,044282857 |
| 204929_s_at                 | NM_006634 | VAMP5             | 10791  | 0,94240355  | 8,217907733 | 0,0055085   |
| 203924_at                   | NM_000846 | GSTA1             | 2938   | 0,942402775 | 3,779866017 | 0,054109315 |
| 213361_at                   | AW129593  | TDRD7             | 23424  | 0,9385448   | 9,499393783 | 0,008209237 |
| 212285_s_at                 | A1424797  | AGR N             | 375790 | 0,93531605  | 6,919188433 | 0,001185893 |
| 203771_s_at                 | AA740186  | BLVRA             | 644    | 0,929273325 | 7,5531436   | 0,007068801 |
| 205170_at                   | NM_005419 | STAT2             | 6773   | 0,925385925 | 8,245662    | 0,006138947 |
| 214647_s_at                 | BG402460  | HFE               | 3077   | 0,921762075 | 5,1778527   | 0,009946281 |
| 206145_at                   | AF178841  | RHAG              | 6005   | 0,91913585  | 4,388055183 | 0,06106351  |
| 211014_s_at                 | AF230410  | GOLGA6L4 /// PML  |        | 0,914936925 | 7,8114698   | 0,020331917 |
| 210705_s_at                 | AF220028  | TRIM5             | 85363  | 0,913913075 | 9,115873733 | 0,005773397 |
| 208423_s_at                 | NM_002445 | MSR1              | 4481   | 0,912018425 | 4,601846333 | 0,035172735 |
| 200887_s_at                 | NM_007315 | STAT1             | 6772   | 0,904022831 | 12,6354284  | 0,000168336 |
| 210219_at                   | U36501    | SP100             | 6672   | 0,89405705  | 5,686976283 | 0,083363532 |
| 213182_x_at                 | R78668    | CDKN1C            | 1028   | 0,8937774   | 8,4810835   | 0,068521654 |
| 215311_at                   | AL109696  | NTRK3             | 4916   | 0,892613175 | 4,56427495  | 0,083363532 |
| 211044_at                   | BC006333  | TRIM14            | 9830   | 0,8890799   | 6,710763983 | 0,011126309 |
| 206637_at                   | NM_014879 | P2RY14            | 9934   | 0,883367075 | 8,385475833 | 0,032268993 |
| 1255_g_at                   | L36861    | GUCA1A            | 2978   | 0,883209066 | 3,78828695  | 0,060657156 |
| 209589_s_at                 | AF025304  | EPHB2             | 2048   | 0,878474625 | 5,91003805  | 0,049530656 |
| 206842_at                   | NM_004979 | KCND1             | 3750   | 0,87396135  | 5,1703548   | 0,078359687 |
| AFFX-HUMISGF3A/M97935_MB_at | STAT1     |                   | 6772   | 0,873680375 | 10,98548888 | 0,003181381 |
| 212658_at                   | N66633    | LHFPL2            | 10184  | 0,87238905  | 8,304122    | 0,01092428  |
| 207433_at                   | NM_000572 | IL10              | 3586   | 0,87154718  | 3,400087098 | 0,085715645 |
| 204994_at                   | NM_002463 | MX2               | 4600   | 0,8710995   | 12,467533   | 0,00814378  |
| 214933_at                   | AA769818  | CACNA1A           | 773    | 0,87099935  | 7,414682933 | 0,016280365 |
| 211013_x_at                 | AF230411  | PML               | 5371   | 0,870012275 | 7,826450983 | 0,099191359 |
| 213348_at                   | N33167    | CDKN1C            | 1028   | 0,867460275 | 9,7848135   | 0,082254268 |
| 205698_s_at                 | U39657    | MAP2K6            | 5608   | 0,86575035  | 8,37857855  | 0,01294011  |
| 220119_at                   | NM_022140 | EPB41L4A          | 64097  | 0,864188525 | 4,628097533 | 0,056789554 |
| 208966_x_at                 | AF208043  | IFI16             | 3428   | 0,8624525   | 12,80580783 | 0,000871292 |
| 220791_x_at                 | NM_014139 | SCN11A            | 11280  | 0,85932394  | 4,334944137 | 0,032445973 |
| 201798_s_at                 | NM_013451 | MYOF              | 26509  | 0,8570987   | 9,316012883 | 0,005286017 |

5371 /// 652346

161527 /// 5371

|                           |           |          |        |             |             |             |
|---------------------------|-----------|----------|--------|-------------|-------------|-------------|
| 218390_s_at               | NM_022063 | C10orf84 | 63877  | 0,85706105  | 5,181519233 | 0,06581545  |
| 208180_s_at               | NM_003543 | HIST1H4H | 8365   | 0,85649765  | 7,121292633 | 0,032522298 |
| 205509_at                 | NM_001871 | CPB1     | 1360   | 0,854158525 | 3,159649467 | 0,096047997 |
| 207777_s_at               | NM_007237 | SP140    | 11262  | 0,853179225 | 9,58527705  | 0,003174331 |
| 205098_at                 | A1421071  | CCR1     | 1230   | 0,84953775  | 11,849644   | 0,004873064 |
| 34689_at                  | AJ243797  | TREX1    | 11277  | 0,846932075 | 10,88517803 | 0,004558106 |
| 206800_at                 | NM_005957 | MTHFR    | 4524   | 0,841082    | 5,827326583 | 0,036995366 |
| 204249_s_at               | NM_005574 | LMO2     | 4005   | 0,84083415  | 11,03945645 | 0,002755809 |
| 220315_at                 | NM_020367 | PARP11   | 57097  | 0,837593725 | 6,568148217 | 0,0055085   |
| 207018_s_at               | NM_004163 | RAB27B   | 5874   | 0,834351335 | 4,574482763 | 0,057292104 |
| 219014_at                 | NM_016619 | PLAC8    | 51316  | 0,833709    | 12,937934   | 0,000511411 |
| 207949_s_at               | NM_004968 | ICA1     | 3382   | 0,833437    | 5,519383817 | 0,053545557 |
| 208121_s_at               | NM_002848 | PTPRO    | 5800   | 0,8289008   | 6,883470633 | 0,003620745 |
| 203593_at                 | NM_012120 | CD2AP    | 23607  | 0,8253716   | 7,929604633 | 0,008745686 |
| 208189_s_at               | NM_000260 | MYO7A    | 4647   | 0,8243002   | 4,430278417 | 0,094239632 |
| 221865_at                 | BF969986  | C9orf91  | 203197 | 0,821922775 | 8,782801167 | 0,002036716 |
| 205897_at                 | NM_004554 | NFATC4   | 4776   | 0,815891725 | 4,377088517 | 0,09267196  |
| 211967_at                 | BG538627  | TMEM123  | 114908 | 0,81553075  | 11,73782167 | 0,001218806 |
| 219356_s_at               | NM_016410 | CHMP5    | 51510  | 0,812204175 | 8,4882197   | 0,015854548 |
| 205249_at                 | NM_000399 | EGR2     | 1959   | 0,811942125 | 5,2582327   | 0,038518539 |
| 209283_at                 | AF007162  | CRYAB    | 1410   | 0,811667525 | 4,930002183 | 0,049217191 |
| 220104_at                 | NM_020119 | ZC3HAV1  | 56829  | 0,80881745  | 8,849686033 | 0,022850086 |
| 200629_at                 | NM_004184 | WARS     | 7453   | 0,803461659 | 12,04706296 | 0,005351688 |
| 210353_s_at               | M65105    | SLC6A2   | 6530   | 0,80173885  | 3,128206267 | 0,096807635 |
| 209213_at                 | BC002511  | CBR1     | 873    | 0,8004961   | 8,292461317 | 0,008326798 |
| 209684_at                 | AL136924  | RIN2     | 54453  | 0,797627925 | 9,06250035  | 0,04208911  |
| 203236_s_at               | NM_009587 | LGALS9   | 3965   | 0,795285875 | 10,79010008 | 0,013287356 |
| 202863_at                 | NM_003113 | SP100    | 6672   | 0,79278355  | 10,03539937 | 0,001257225 |
| 65517_at                  | AA910946  | AP1M2    | 10053  | 0,791761525 | 5,667595317 | 0,09903155  |
| 35254_at                  | AB007447  | TRAFD1   | 10906  | 0,7915041   | 10,6879094  | 0,005315547 |
| 210247_at                 | AW139618  | SYN2     | 6854   | 0,787580075 | 5,898003183 | 0,052379197 |
| 204745_x_at               | NM_005950 | MT1G     | 4495   | 0,786432125 | 9,499332883 | 0,048388958 |
| 218429_s_at               | NM_018381 | C19orf66 | 55337  | 0,78637135  | 10,68893092 | 0,002036716 |
| 53720_at                  | A1862559  | C19orf66 | 55337  | 0,78504915  | 10,4032295  | 0,00212728  |
| 209906_at                 | U62027    | C3AR1    | 719    | 0,7838761   | 10,25313027 | 0,009598804 |
| 200628_s_at               | M61715    | WARS     | 7453   | 0,783791014 | 11,28756611 | 0,01397946  |
| 213988_s_at               | BE971383  | SAT1     | 6303   | 0,7821095   | 11,90174683 | 0,005267857 |
| 209457_at                 | U16996    | DUSP5    | 1847   | 0,781374775 | 8,280758717 | 0,009946281 |
| 209392_at                 | L35594    | ENPP2    | 5168   | 0,780151875 | 6,37663225  | 0,030536364 |
| 205099_s_at               | A1421071  | CCR1     | 1230   | 0,7791125   | 11,03627533 | 0,019667564 |
| 217371_s_at               | Y09908    | IL15     | 3600   | 0,77492925  | 7,1901815   | 0,00378776  |
| 218085_at                 | NM_015961 | CHMP5    | 51510  | 0,772970275 | 8,054077717 | 0,023076056 |
| 217683_at                 | AA115963  | HBE1     | 3046   | 0,7689525   | 5,3853586   | 0,088776777 |
| 203276_at                 | NM_005573 | LMNB1    | 4001   | 0,768182975 | 10,06174748 | 0,004740669 |
| 212807_s_at               | BF447105  | SORT1    | 6272   | 0,76808445  | 8,19654045  | 0,005825176 |
| 204991_s_at               | NM_000268 | NF2      | 4771   | 0,76547805  | 5,26565155  | 0,096638502 |
| 220160_s_at               | NM_007059 | KPTN     | 11133  | 0,764273725 | 7,479018517 | 0,006301643 |
| 205692_s_at               | NM_001775 | CD38     | 952    | 0,76389525  | 8,05468545  | 0,034223692 |
| 216881_x_at               | X07882    | PRB4     | 5545   | 0,762076175 | 4,269616233 | 0,031356756 |
| 205228_at                 | NM_002898 | RBM52    | 5939   | 0,76073955  | 6,0559158   | 0,073870097 |
| 206697_s_at               | NM_005143 | HP       | 3240   | 0,758146925 | 7,058329983 | 0,0105847   |
| 206332_s_at               | NM_005531 | IFI16    | 3428   | 0,757582    | 12,54981517 | 0,002066354 |
| 206994_at                 | NM_001899 | CST4     | 1472   | 0,75655995  | 5,984295    | 0,094544996 |
| 219439_at                 | NM_020156 | C1GALT1  | 56913  | 0,753706225 | 7,590495417 | 0,024515166 |
| 203258_at                 | NM_006442 | DRAP1    | 10589  | 0,753460725 | 9,57839215  | 0,006783954 |
| AFX-HUMISGF3A/M97935_s_at |           | STAT1    | 6772   | 0,7528495   | 11,88743767 | 0,000860951 |
| 211826_s_at               | L22179    | AFF1     | 4299   | 0,7492093   | 5,881622817 | 0,057756142 |
| 211864_s_at               | AF207990  | MYOF     | 26509  | 0,748560925 | 8,051617717 | 0,041882749 |
| 218686_s_at               | NM_022450 | RHBDP1   | 64285  | 0,744308975 | 3,638672833 | 0,083749425 |
| 204698_at                 | NM_002201 | ISG20    | 3669   | 0,7425045   | 12,0833705  | 0,008850064 |
| 205773_at                 | NM_014912 | CPEB3    | 22849  | 0,741147425 | 5,865376283 | 0,028455319 |
| 209893_s_at               | M58596    | FUT4     | 2526   | 0,740573675 | 7,247931133 | 0,007967346 |
| 205992_s_at               | NM_000585 | IL15     | 3600   | 0,7400979   | 8,253705    | 0,02231803  |
| 212681_at                 | A1770004  | EPB41L3  | 23136  | 0,739754975 | 8,113816383 | 0,025177258 |
| 221245_s_at               | NM_030804 | FZD5     | 7855   | 0,738886675 | 5,570165517 | 0,012573163 |
| 202779_s_at               | NM_014501 | UBE25    | 27338  | 0,73703175  | 8,9245636   | 0,032583519 |
| 204326_x_at               | NM_002450 | MT1X     | 4501   | 0,733256275 | 9,829240217 | 0,012933485 |
| 222217_s_at               | BC003654  | SLC27A3  | 11000  | 0,730885325 | 9,987626483 | 0,014652044 |
| 208176_at                 | NM_012146 | DUX1     | 26584  | 0,728379875 | 4,760182183 | 0,085715645 |
| 205612_at                 | NM_007351 | MMRN1    | 22915  | 0,727470225 | 4,45499585  | 0,075088039 |
| 217388_s_at               | D55639    | KYNU     | 8942   | 0,726793675 | 8,961108117 | 0,003121726 |
| 202284_s_at               | NM_000389 | CDKN1A   | 1026   | 0,7243666   | 9,183019967 | 0,027412228 |
| 33304_at                  | U88964    | ISG20    | 3669   | 0,72049275  | 11,8072735  | 0,008701694 |
| 201762_s_at               | NM_002818 | PSME2    | 5721   | 0,71947025  | 11,99975183 | 0,000168336 |
| 200730_s_at               | BF576710  | PTP4A1   | 7803   | 0,718812497 | 8,493090633 | 0,039152888 |
| 205126_at                 | NM_006296 | VRK2     | 7444   | 0,717550075 | 8,261565267 | 0,000967121 |
| 221816_s_at               | BF055474  | PHF11    | 51131  | 0,7126445   | 11,81222933 | 0,001265153 |
| 219010_at                 | NM_018265 | C1orf106 | 55765  | 0,710819425 | 4,857418567 | 0,097581658 |
| 218815_s_at               | NM_018022 | TMEM51   | 55092  | 0,710469125 | 6,560123133 | 0,012024077 |
| 202949_s_at               | NM_001450 | FHL2     | 2274   | 0,707255675 | 7,007595383 | 0,072415168 |
| 212380_at                 | D43949    | FTSJ2    | 23070  | 0,707176425 | 9,6882097   | 0,06106351  |
| 202864_s_at               | NM_003113 | SP100    | 6672   | 0,7068866   | 10,38382338 | 0,003350846 |
| 204205_at                 | NM_021822 | APOBEC3G | 60489  | 0,706884725 | 10,52542908 | 0,004631762 |
| 215754_at                 | AU148040  | SCARB2   | 950    | 0,702739575 | 8,39260615  | 0,013223411 |
| 219806_s_at               | NM_020179 | C11orf75 | 56935  | 0,7023968   | 10,35787723 | 0,002472918 |
| 202307_s_at               | NM_000593 | TAP1     | 6890   | 0,7012015   | 12,24642317 | 0,005333777 |
| 213716_s_at               | BF939675  | SECTM1   | 6398   | 0,70037425  | 11,66886617 | 0,04666697  |
| 219799_s_at               | NM_005771 | DHRS9    | 10170  | 0,699628775 | 9,714486183 | 0,00791681  |
| 219403_s_at               | AF155510  | HPSE     | 10855  | 0,69452555  | 9,481992883 | 0,034527577 |
| 204038_s_at               | NM_001401 | LPAR1    | 1902   | 0,693570825 | 6,82809105  | 0,009793986 |
| 205420_at                 | NM_000288 | PEX7     | 5191   | 0,691303725 | 5,52792275  | 0,080448531 |
| 203397_s_at               | BF063271  | GALNT3   | 2591   | 0,689419625 | 8,464972483 | 0,033261553 |
| 210659_at                 | U79526    | CMKLR1   | 1240   | 0,6854708   | 6,813602983 | 0,019562161 |
| 210755_at                 | U46010    | HGF      | 3082   | 0,6851228   | 4,870468133 | 0,034223692 |
| 218559_s_at               | NM_005461 | MAFB     | 9935   | 0,6848115   | 11,415389   | 0,038021913 |
| 210218_s_at               | U36501    | SP100    | 6672   | 0,683892675 | 8,5149427   | 0,027424948 |

|             |           |                       |        |              |             |             |
|-------------|-----------|-----------------------|--------|--------------|-------------|-------------|
| 201646_at   | AA885297  | SCARB2                | 950    | 0,683262075  | 7,52359505  | 0,03032375  |
| 217419_x_at | AK021586  | AGRN                  | 375790 | 0,6812175    | 6,62127195  | 0,016674239 |
| 209703_x_at | BC004492  | METTL7A               | 25840  | 0,68033235   | 6,7043211   | 0,006218044 |
| 221827_at   | BE788439  | RBCK1                 | 10616  | 0,678474475  | 10,54502212 | 0,003502905 |
| 206710_s_at | NM_012307 | EPB41L3               | 23136  | 0,6760681    | 8,654287767 | 0,04208911  |
| 211138_s_at | BC005297  | KMO                   | 8564   | 0,673077775  | 6,935478267 | 0,022983764 |
| 203805_s_at | NM_000135 | FANCA                 | 2175   | 0,6719438    | 8,327598883 | 0,05418992  |
| 201761_at   | NM_006636 | MTHFD2                | 10797  | 0,66975685   | 8,465957367 | 0,005125854 |
| 207158_at   | NM_001644 | APOBEC1               | 339    | 0,66880135   | 5,202156167 | 0,035172735 |
| 210873_x_at | U03891    | APOBEC3A              | 200315 | 0,6683444    | 11,48060873 | 0,033261553 |
| 211776_s_at | BC006141  | EPB41L3               | 23136  | 0,66739755   | 8,2768131   | 0,026918929 |
| 204769_s_at | NM_000544 | TAP2                  | 6891   | 0,664416525  | 9,34700075  | 0,059834764 |
| 218776_s_at | NM_024956 | TMEM62                | 80021  | 0,660555825  | 7,9186405   | 0,011126309 |
| 216336_x_at | AL031602  | LOC100505584 /// MT1E |        | 0,65587745   | 8,975934133 | 0,052290298 |
| 210152_at   | U82979    | LILRB4                | 11006  | 0,6536651    | 7,847623583 | 0,023136051 |
| 210985_s_at | AF056322  | SP100                 | 6672   | 0,65330885   | 6,811217133 | 0,05922265  |
| 220252_x_at | NM_025159 | CXorf21               | 80231  | 0,651136625  | 7,829695783 | 0,055629308 |
| 210889_s_at | M31933    | FCGR2B                | 2213   | 0,6506182    | 9,447685567 | 0,027744429 |
| 201138_s_at | NM_003142 | SSB                   | 6741   | 0,650507588  | 8,222118469 | 0,004558106 |
| 210224_at   | AF031469  | MR1                   | 3140   | 0,649861025  | 8,510448533 | 0,003625851 |
| 204342_at   | NM_013386 | SLC25A24              | 29957  | 0,64899025   | 8,619880917 | 0,043751627 |
| 209762_x_at | AA969194  | SP110                 | 3431   | 0,6473955    | 11,9209545  | 0,00166876  |
| 206247_at   | NM_005931 | MICB                  | 4277   | 0,6443669    | 10,14432493 | 0,006569381 |
| 205306_x_at | AI074145  | KMO                   | 8564   | 0,643981675  | 6,926619317 | 0,008745686 |
| 217508_s_at | BE783279  | C18orf25              | 147339 | 0,64384525   | 7,125526267 | 0,029560763 |
| 221050_s_at | NM_019096 | GTPBP2                | 54676  | 0,64218275   | 9,408555433 | 0,011712582 |
| 208965_s_at | BG256677  | IFI16                 | 3428   | 0,641567325  | 10,94070015 | 0,014833716 |
| 220358_at   | NM_018664 | BATF3                 | 55509  | 0,641050375  | 7,331248717 | 0,041149375 |
| 203127_s_at | BC005123  | SPTLC2                | 9517   | 0,64003485   | 9,97953815  | 0,013525545 |
| 218589_at   | NM_005767 | LPAR6                 | 10161  | 0,639069225  | 7,8855913   | 0,079692659 |
| 209476_at   | AL080080  | TMX1                  | 81542  | 0,638748875  | 8,826016983 | 0,056776863 |
| 216202_s_at | U15555    | SPTLC2                | 9517   | 0,63851685   | 9,2523378   | 0,048718406 |
| 204804_at   | NM_003141 | TRIM21                | 6737   | 0,637332225  | 10,83201025 | 0,006954861 |
| 207574_s_at | NM_015675 | GADD45B               | 4616   | 0,63196935   | 10,4531602  | 0,007114078 |
| 212735_at   | AI798908  | KIAA0226              | 9711   | 0,6318788    | 9,156799233 | 0,007400283 |
| 208012_x_at | NM_004509 | SP110                 | 3431   | 0,63127775   | 12,04471083 | 0,003181381 |
| 207091_at   | NM_002562 | P2RX7                 | 5027   | 0,631240775  | 7,304427533 | 0,002755809 |
| 202609_at   | NM_004447 | EP58                  | 2059   | 0,6304014    | 6,01821025  | 0,048620774 |
| 220576_at   | NM_024989 | PGAP1                 | 80055  | 0,624451325  | 7,132811233 | 0,080206237 |
| 203148_s_at | NM_014788 | TRIM14                | 9830   | 0,61871965   | 10,78432527 | 0,001899777 |
| 205513_at   | NM_001062 | TCN1                  | 6947   | 0,6173379    | 8,5172013   | 0,008255297 |
| 203964_at   | NM_004688 | NMI                   | 9111   | 0,6171835    | 11,10132217 | 0,006113931 |
| 200042_at   | NM_014306 | C22orf28              | 51493  | 0,615404138  | 9,531863026 | 0,001042023 |
| 215209_at   | AU143984  | SEC24D                | 9871   | 0,615291875  | 7,066207183 | 0,055364973 |
| 201538_s_at | AL048503  | DUSP3                 | 1845   | 0,614217475  | 6,349327467 | 0,062865533 |
| 211760_s_at | BC005974  | VAMP4                 | 8674   | 0,613831425  | 6,33196855  | 0,041849885 |
| 219159_s_at | AL121985  | SLAMF7                | 57823  | 0,6122372    | 7,528520833 | 0,031025882 |
| 209276_s_at | AF162769  | GLRX                  | 2745   | 0,60946005   | 8,6399492   | 0,051668437 |
| 221345_at   | NM_005306 | FFAR2                 | 2867   | 0,60940375   | 12,33059517 | 0,014127287 |
| 201647_s_at | NM_005506 | SCARB2                | 950    | 0,608309875  | 6,741370967 | 0,047735914 |
| 204385_at   | NM_003937 | KYNU                  | 8942   | 0,6077453    | 7,761786283 | 0,023973574 |
| 219055_at   | NM_018079 | SRBD1                 | 55133  | 0,60659185   | 8,622497317 | 0,001591348 |
| 221641_s_at | AF241787  | ACOT9                 | 23597  | 0,604579     | 9,730738317 | 0,044047326 |
| 209304_x_at | AF087853  | GADD45B               | 4616   | 0,6036149    | 9,684357683 | 0,018386556 |
| 213734_at   | BG260658  | WSB2                  | 55884  | 0,6016375    | 7,761853467 | 0,024170302 |
| 210592_s_at | M55580    | SAT1                  | 6303   | 0,59951475   | 13,1675555  | 0,001166055 |
| 214681_at   | AI830490  | GK                    | 2710   | 0,599011925  | 8,050005783 | 0,068521654 |
| 209761_s_at | AA969194  | SP110                 | 3431   | 0,5982955    | 12,01583867 | 0,004915944 |
| 204279_at   | NM_002800 | PSMB9                 | 5698   | 0,5977895    | 13,07501333 | 0,001428731 |
| 214022_s_at | AA749101  | IFITM1                | 8519   | 0,596787     | 14,3788125  | 0,000548902 |
| 219885_at   | NM_018042 | SLFN12                | 55106  | 0,59666535   | 7,154164    | 0,055912033 |
| 218397_at   | NM_018062 | FANCL                 | 55120  | 0,595295025  | 6,74513165  | 0,006218044 |
| 203817_at   | W93728    | GUCY1B3               | 2983   | 0,595109725  | 7,686329117 | 0,016344205 |
| 212647_at   | NM_006270 | RRAS                  | 6237   | 0,591406975  | 8,577722617 | 0,094710866 |
| 215641_at   | AK000709  | SEC24D                | 9871   | 0,58867975   | 6,351566817 | 0,099569761 |
| 218974_at   | NM_018013 | SOBP                  | 55084  | 0,58498095   | 6,0250747   | 0,0697034   |
| 217119_s_at | Z79783    | CXCR3                 | 2833   | -0,589671025 | 7,202299083 | 0,045976069 |
| 208694_at   | U47077    | PRKDC                 | 5591   | -0,59023665  | 9,6177742   | 0,003663211 |
| 215471_s_at | AJ242502  | MAP7                  | 9053   | -0,591282725 | 6,240397767 | 0,079766009 |
| 207838_x_at | NM_020524 | PBXIP1                | 57326  | -0,592770425 | 8,721529717 | 0,009973124 |
| 202438_x_at | BF346014  | IDS                   | 3423   | -0,5941763   | 7,779958067 | 0,047552586 |
| 215005_at   | AV723666  | NECAB2                | 54550  | -0,595475875 | 7,572225883 | 0,048620774 |
| 212823_s_at | AI738980  | PLEKHG3               | 26030  | -0,602497025 | 9,596144517 | 0,058807177 |
| 213478_at   | AB028949  | KAZ                   | 23254  | -0,605169825 | 8,44043125  | 0,049249054 |
| 203936_s_at | NM_004994 | MMP9                  | 4318   | -0,605702    | 11,78504317 | 0,053769193 |
| 207681_at   | NM_001504 | CXCR3                 | 2833   | -0,607053225 | 7,78038395  | 0,090424903 |
| 220888_s_at | NM_020356 | CASS4                 | 57091  | -0,607422675 | 6,984897    | 0,072191906 |
| 213549_at   | AI890972  | PDZD8                 | 118987 | -0,6078093   | 7,3371368   | 0,016235772 |
| 206208_at   | NM_000717 | CA4                   | 762    | -0,6146653   | 8,206182333 | 0,038021913 |
| 201392_s_at | BG031974  | IGF2R                 | 3482   | -0,617679942 | 10,78171314 | 0,006113931 |
| 211413_s_at | AF229067  | PADI4                 | 23569  | -0,617963025 | 8,4686933   | 0,026873504 |
| 206608_s_at | NM_020366 | RPGRIP1               | 57096  | -0,625159475 | 7,285609117 | 0,004745329 |
| 206209_s_at | NM_000717 | CA4                   | 762    | -0,629178225 | 8,5646736   | 0,025341334 |
| 220797_at   | NM_024086 | METT10D               | 79066  | -0,630161575 | 6,228995933 | 0,059463884 |
| 208031_s_at | NM_000635 | RFK2                  | 5990   | -0,630534575 | 6,712832117 | 0,030444744 |
| 210791_s_at | BC000277  | ARHGAP32              | 9743   | -0,632138625 | 5,58830715  | 0,092887966 |
| 201188_s_at | NM_002224 | ITPR3                 | 3710   | -0,63473611  | 7,436480215 | 0,055036253 |
| 213045_at   | AB011133  | MAST3                 | 23031  | -0,636778175 | 10,72903922 | 0,000168336 |
| 211926_s_at | AI827941  | MYH9                  | 4627   | -0,64260185  | 11,35835177 | 0,001193076 |
| 203977_at   | NM_000116 | TAZ                   | 6901   | -0,6453888   | 7,6883706   | 0,091089516 |
| 203887_s_at | NM_000361 | THBD                  | 7056   | -0,646319275 | 8,972305483 | 0,003174331 |
| 202316_x_at | NM_006048 | UBE4B                 | 10277  | -0,647441    | 8,144630317 | 0,005649429 |
| 207826_s_at | NM_002167 | ID3                   | 3399   | -0,656450525 | 8,021092617 | 0,096605725 |
| 213269_at   | N21541    | ZNF248                | 57209  | -0,6607674   | 6,94849995  | 0,013559261 |
| 202888_s_at | NM_001150 | ANPEP                 | 290    | -0,66353615  | 11,52011057 | 0,011883091 |
| 209460_at   | AF237813  | ABAT                  | 18     | -0,668238725 | 8,874626967 | 0,003181381 |

|             |           |                                                                                                     |        |              |             |             |
|-------------|-----------|-----------------------------------------------------------------------------------------------------|--------|--------------|-------------|-------------|
| 219499_at   | NM_018144 | SEC61A2                                                                                             | 55176  | -0,674799875 | 6,503313967 | 0,004740669 |
| 201971_s_at | NM_001690 | ATP6V1A                                                                                             | 523    | -0,689098975 | 9,762147683 | 0,006224237 |
| 219452_at   | NM_022355 | DPEP2                                                                                               | 64174  | -0,7027175   | 11,81471217 | 0,002755809 |
| 204560_at   | NM_004117 | FKBP5                                                                                               | 2289   | -0,702910075 | 8,259279683 | 0,082264209 |
| 213354_s_at | AI935343  | NR2F6                                                                                               | 2063   | -0,719156395 | 2,360531003 | 0,051668437 |
| 206653_at   | BF062139  | POLR3G                                                                                              | 10622  | -0,720499873 | 4,340159352 | 0,096183603 |
| 201739_at   | NM_005627 | SGK1                                                                                                | 6446   | -0,7242823   | 11,11854563 | 0,01074069  |
| 214321_at   | BF440025  | NOV                                                                                                 | 4856   | -0,726460025 | 7,629588167 | 0,032954807 |
| 208331_at   | NM_004678 | BPY2                                                                                                | 9083   | -0,742906375 | 2,049988583 | 0,073579902 |
| 221874_at   | AI565067  | KIAA1324                                                                                            | 57535  | -0,7443185   | 7,683617117 | 0,087583958 |
| 217184_s_at | X52213    | LTK                                                                                                 | 4058   | -0,7447342   | 6,257859833 | 0,078359687 |
| 201416_at   | NM_003107 | SOX4                                                                                                | 6659   | -0,756992552 | 7,257064189 | 0,013800421 |
| 203888_at   | NM_000361 | THBD                                                                                                | 7056   | -0,76114925  | 8,064624417 | 0,00161738  |
| 213433_at   | AF038193  | ARL3                                                                                                | 403    | -0,78523005  | 5,74851695  | 0,025177258 |
| 213121_at   | W67744    | SNRNP70                                                                                             | 6625   | -0,802613275 | 5,534776683 | 0,047648119 |
| 204621_s_at | AI935096  | NR4A2                                                                                               | 4929   | -0,803726125 | 4,950287833 | 0,071617956 |
| 203061_s_at | AI673553  | MDC1                                                                                                | 9656   | -0,840510525 | 6,38444135  | 0,092322819 |
| 219102_at   | NM_020650 | RCN3                                                                                                | 57333  | -0,84160725  | 5,73309605  | 0,094904652 |
| 221309_at   | NM_006450 | RBM17                                                                                               | 84991  | -0,844356375 | 3,72772365  | 0,081005175 |
| 209184_s_at | AF073310  | IRS2                                                                                                | 8660   | -0,85342125  | 10,13721555 | 0,000312938 |
| 222177_s_at | AF244812  | SCAND2                                                                                              | 54581  | -0,86005935  | 3,57919045  | 0,073822694 |
| 206114_at   | NM_004438 | EPHA4                                                                                               | 2043   | -0,863923975 | 6,312910833 | 0,093243225 |
| 216156_at   | AK022897  | RECK                                                                                                | 8434   | -0,8676061   | 2,679308533 | 0,097300005 |
| 204990_s_at | NM_000213 | ITGB4                                                                                               | 3691   | -0,8722181   | 4,757993917 | 0,098257507 |
| 215443_at   | BE740743  | TSHR                                                                                                | 7253   | -0,887292025 | 2,900311333 | 0,058440169 |
| 203463_s_at | H05668    | EPN2                                                                                                | 22905  | -0,887386775 | 4,515493817 | 0,063249363 |
| 210147_at   | U47054    | ART3                                                                                                | 419    | -0,88922295  | 3,34489895  | 0,097935513 |
| 210100_s_at | AF327657  | ABCA2                                                                                               | 20     | -0,903035525 | 4,177950417 | 0,082838926 |
| 221557_s_at | AF288571  | LEF1                                                                                                | 51176  | -0,903775475 | 5,857425167 | 0,03288812  |
| 214804_at   | BF793446  | CENPI                                                                                               | 2491   | -0,916576925 | 3,554511467 | 0,088656355 |
| 210344_at   | AF323729  | OSBPL7                                                                                              | 114881 | -0,92371815  | 4,35796625  | 0,080206327 |
| 204428_s_at | NM_000229 | LCAT                                                                                                | 3931   | -0,9291102   | 5,32313325  | 0,067135265 |
| 220654_at   | NM_021092 | PPY2                                                                                                | 23614  | -0,947117875 | 2,919426933 | 0,0278965   |
| 202291_s_at | NM_000900 | MGP                                                                                                 | 4256   | -0,9566876   | 3,915645417 | 0,088656355 |
| 220179_at   | NM_022357 | DPEP3                                                                                               | 64180  | -0,961319275 | 7,277552733 | 0,01010358  |
| 207092_at   | NM_000230 | LEP                                                                                                 | 3952   | -0,965774325 | 3,57615175  | 0,090300058 |
| 209185_s_at | AF073310  | IRS2                                                                                                | 8660   | -0,96914825  | 10,99525517 | 0,000548902 |
| 204896_s_at | AI675173  | PTGER4                                                                                              | 5734   | -0,984387525 | 6,1845214   | 0,076937656 |
| 219935_at   | NM_007038 | ADAMTS5                                                                                             | 11096  | -0,988239863 | 5,294173475 | 0,055034527 |
| 203641_s_at | NM_014900 | COBLL1                                                                                              | 22837  | -0,997092875 | 5,339731167 | 0,050894686 |
| 215559_at   | AI074459  | ABCC6                                                                                               | 368    | -1,010775225 | 5,0917009   | 0,056362057 |
| 205051_s_at | NM_000222 | KIT                                                                                                 | 3815   | -1,013066    | 5,688695867 | 0,015084322 |
| 220057_at   | NM_020411 | XAGE1A /// XAGE1B /// XAGE1C /// XAGE1D /// XAGE1E 653048 /// 653067 /// 653219 /// 653220 /// 9503 | 9503   | -1,01741745  | 3,61863855  | 0,028447476 |
| 206336_at   | NM_002993 | CXCL6                                                                                               | 6372   | -1,020612725 | 4,389767367 | 0,01397946  |
| 214418_at   | AI656822  | CT62                                                                                                | 196993 | -1,02799684  | 3,202188473 | 0,020331917 |
| 212793_at   | BF513244  | DAAM2                                                                                               | 23500  | -1,033015675 | 5,472154733 | 0,034223692 |
| 220727_at   | NM_021161 | KCNK10                                                                                              | 54207  | -1,0375374   | 4,60109045  | 0,01208934  |
| 220655_at   | NM_024873 | TNIP3                                                                                               | 79931  | -1,039184125 | 3,828719333 | 0,065647815 |
| 219313_at   | NM_017577 | GRAMD1C                                                                                             | 54762  | -1,050284875 | 5,928738633 | 0,005825176 |
| 209866_s_at | AF307080  | LPHN3                                                                                               | 23284  | -1,0690162   | 3,098664383 | 0,027814841 |
| 205675_at   | AI623321  | MTTP                                                                                                | 4547   | -1,073331225 | 2,8390806   | 0,014833716 |
| 207712_at   | NM_001187 | BAGE                                                                                                | 574    | -1,110460215 | 3,67547599  | 0,032268993 |
| 220724_at   | NM_025087 | CWH43                                                                                               | 80157  | -1,12058087  | 2,124566577 | 0,014443822 |
| 204138_s_at | NM_003422 | MZF1                                                                                                | 7593   | -1,2222996   | 5,0268451   | 0,013868327 |
| 218839_at   | NM_012258 | HEY1                                                                                                | 23462  | -1,259787    | 4,18629205  | 0,009598804 |
| 215757_at   | AK022387  | PRKDC                                                                                               | 5591   | -1,329783525 | 5,0021247   | 0,009344168 |
| 212158_at   | AL577322  | SDC2                                                                                                | 6383   | -1,414220843 | 4,217150755 | 0,038190435 |
