# Supplementary material for: Of mice and men: the host response to influenza virus infection
Source: PubMed Central journal article supplement (PMC6132725; doi:10.1007/s00335-018-9750-y), 2018-06-15
Supplement: 335_2018_9750_MOESM9_ESM.pdf [file 335_2018_9750_MOESM9_ESM.pdf]

| ID           | Entrez_Gene_ID | Accession      | Symbol       | logFC        | AveExpr     | adj.P.Val   |
|--------------|----------------|----------------|--------------|--------------|-------------|-------------|
| ILMN_1693192 | 5266           | NM_002638.2    | PI3          | -1,539338919 | 8,926154617 | 8,91E-25    |
| ILMN_1749722 | 57674          | NM_020914.3    | RNF213       | -1,145663857 | 10,33022481 | 4,72E-08    |
| ILMN_3235180 | 100131726      | NR_024479.1    | LOC100131726 | -1,072862023 | 9,602176633 | 2,35E-08    |
| ILMN_1701603 | 249            | NM_000478.3    | ALPL         | -1,03081331  | 10,09125348 | 2,14E-09    |
| ILMN_1701386 | 55437          | NM_018571.5    | STRADB       | -1,01702362  | 9,651964027 | 1,71E-09    |
| ILMN_1804938 | 131601         | NM_016372.1    | GPR175       | -0,956332033 | 9,596753181 | 1,73E-10    |
| ILMN_1804350 | 644852         | XM_934213.1    | LOC644852    | -0,922333873 | 9,450221314 | 6,78E-10    |
| ILMN_3249578 | 100132394      | XM_001713809.1 | LOC100132394 | -0,922035337 | 9,544381149 | 3,36E-06    |
| ILMN_1714765 | 389599         | XM_001131588.1 | LOC389599    | -0,918189966 | 9,482311452 | 6,71E-09    |
| ILMN_1788095 | 84926          | NM_032840.1    | SPRYD3       | -0,91649679  | 9,971597973 | 8,20E-10    |
| ILMN_3285762 | 100131164      | XM_001721919.1 | LOC100131164 | -0,907545786 | 8,912155011 | 1,37E-09    |
| ILMN_1733559 | 100008589      | NR_003287.1    | LOC100008589 | -0,901595238 | 9,282886707 | 2,02E-06    |
| ILMN_1749984 | 440313         | NM_001013704.1 | LOC440313    | -0,898748169 | 8,902163282 | 1,55E-10    |
| ILMN_1786328 | 25853          | NM_015397.1    | WDR40A       | -0,896097571 | 10,0276043  | 1,23E-08    |
| ILMN_1701933 | 6622           | NM_007308.1    | SNCA         | -0,893827011 | 10,06553902 | 1,53E-05    |
| ILMN_1706434 | 440359         | XM_496143.2    | LOC440359    | -0,882446962 | 9,856530207 | 5,28E-08    |
| ILMN_3276971 | 642469         | XR_042342.1    | LOC642469    | -0,879013184 | 9,086513777 | 1,25E-09    |
| ILMN_1679919 | 84164          | NM_032204.3    | ASCC2        | -0,877305108 | 10,00718064 | 4,91E-11    |
| ILMN_1745962 | 25793          | NM_001033024.1 | FBXO7        | -0,858605268 | 9,708500723 | 9,56E-11    |
| ILMN_1743046 | 388007         | NM_207378.2    | SERPINA13    | -0,856877777 | 8,75306834  | 1,42E-10    |
| ILMN_2404049 | 55544          | NM_183425.1    | RBM38        | -0,856176661 | 9,357765989 | 5,17E-14    |
| ILMN_1814397 | 2038           | NM_000119.1    | EPB42        | -0,842985983 | 8,484056585 | 1,48E-11    |
| ILMN_2084825 | 3048           | NM_000184.2    | HBG2         | -0,82896688  | 11,40568245 | 0,005692866 |
| ILMN_1804509 | 56896          | NM_020134.2    | DPYSL5       | -0,828148785 | 9,01643875  | 6,33E-10    |
| ILMN_1796678 | 3047           | NM_000559.2    | HBG1         | -0,825696345 | 11,34564943 | 0,004820987 |
| ILMN_2090105 | 8407           | NM_003564.1    | TAGLN2       | -0,823961312 | 10,81208512 | 4,84E-21    |
| ILMN_2060115 | 6653           | NM_003105.3    | SORL1        | -0,794377187 | 9,287899207 | 4,08E-18    |
| ILMN_3224856 | 729660         | XR_039044.1    | LOC729660    | -0,789481299 | 9,443789165 | 9,92E-13    |
| ILMN_1766165 | 6622           | NM_000345.2    | SNCA         | -0,785794421 | 9,050607941 | 4,21E-06    |
| ILMN_3183620 | 100128326      | XR_038006.1    | LOC100128326 | -0,779953743 | 9,243497633 | 2,94E-14    |
| ILMN_1750181 | 54997          | NM_017899.2    | TESC         | -0,765285573 | 9,309491197 | 5,24E-09    |
| ILMN_1743911 | 51629          | NM_016016.1    | SLC25A39     | -0,753236762 | 12,31635234 | 8,23E-07    |
| ILMN_1654118 | 598            | NM_138578.1    | BCL2L1       | -0,750299209 | 9,882478639 | 2,43E-08    |
| ILMN_2348487 | 84658          | NM_032571.2    | EMR3         | -0,747643887 | 8,487966351 | 5,52E-29    |
| ILMN_2072598 | 401357         | NM_001013685.1 | LOC401357    | -0,741295768 | 9,04767459  | 1,35E-13    |
| ILMN_1772731 | 3029           | NM_005326.4    | HAGH         | -0,736430304 | 9,419813059 | 4,20E-09    |
| ILMN_1809173 | 729021         | XR_015834.1    | LOC729021    | -0,718956948 | 8,93373909  | 1,21E-16    |
| ILMN_1657932 | 4588           | NM_005961.2    | MUC6         | -0,717330699 | 8,699537106 | 1,29E-10    |
| ILMN_3183139 | 100130914      | XR_037646.1    | LOC100130914 | -0,711534033 | 8,914254564 | 5,97E-14    |
| ILMN_1815527 | 3045           | NM_000519.3    | HBD          | -0,710826993 | 10,02850573 | 0,000149348 |
| ILMN_1762725 | 51386          | NM_016091.2    | EIF3L        | -0,703667455 | 9,803868904 | 5,84E-17    |
| ILMN_1783753 | 51060          | NM_015913.2    | TXNDC12      | -0,702185216 | 8,440216803 | 4,48E-20    |
| ILMN_3287583 | 648390         | XR_037845.1    | LOC648390    | -0,700850067 | 11,28045454 | 4,54E-05    |
| ILMN_2212763 | 3385           | NM_002162.2    | ICAM3        | -0,695555905 | 11,18592617 | 3,50E-20    |
| ILMN_1680652 | 8991           | NM_003944.2    | SELENBP1     | -0,689073015 | 8,261827729 | 1,21E-09    |
| ILMN_3240740 | 51386          | NM_016091.2    | EIF3L        | -0,685644233 | 10,83753845 | 2,75E-13    |
| ILMN_1715963 | 25793          | NM_001033024.1 | FBXO7        | -0,683195948 | 8,465074144 | 3,84E-12    |
| ILMN_2094061 | 3613           | NM_014214.1    | IMPA2        | -0,676563227 | 8,687417383 | 2,21E-34    |
| ILMN_1760714 | 6188           | NM_001005.3    | RPS3         | -0,675037379 | 11,24473634 | 5,57E-11    |
| ILMN_3283155 | 642357         | XR_018361.2    | LOC642357    | -0,674181514 | 11,06503494 | 3,13E-11    |
| ILMN_1759818 | 6653           | NM_003105.3    | SORL1        | -0,668826219 | 9,825247005 | 1,30E-14    |
| ILMN_1688322 | 51094          | NM_015999.2    | ADIPOR1      | -0,66614303  | 10,375139   | 1,66E-06    |
| ILMN_1782788 | 8531           | NM_003651.3    | CSDA         | -0,665180504 | 11,72069094 | 2,30E-05    |

|              |           |                |              |              |             |             |
|--------------|-----------|----------------|--------------|--------------|-------------|-------------|
| ILMN_1778374 | 682       | NM_198590.1    | BSG          | -0,662007823 | 9,29090441  | 5,71E-12    |
| ILMN_3249327 | 100134530 | XM_001714618.1 | LOC100134530 | -0,660063573 | 8,679226484 | 6,15E-16    |
| ILMN_1766539 | 643319    | XM_927980.1    | LOC643319    | -0,654310315 | 8,787525346 | 1,55E-24    |
| ILMN_1691892 | 8407      | NM_003564.1    | TAGLN2       | -0,64027718  | 8,784338803 | 3,36E-22    |
| ILMN_1744795 | 6907      | NM_005647.2    | TBL1X        | -0,637137315 | 8,640005021 | 9,56E-33    |
| ILMN_1738383 | 1938      | NM_001961.3    | EEF2         | -0,627131233 | 10,96378571 | 4,63E-15    |
| ILMN_2262288 | 1937      | NM_001404.4    | EEF1G        | -0,623154506 | 10,80299106 | 1,73E-10    |
| ILMN_1658624 | 80700     | NM_025241.1    | UBXN6        | -0,622893607 | 9,45536758  | 1,93E-08    |
| ILMN_2166831 | 6191      | NM_001007.3    | RPS4X        | -0,619594777 | 10,12357268 | 1,20E-08    |
| ILMN_1668039 | 2995      | NM_016815.2    | GYPC         | -0,614945904 | 11,36381469 | 2,19E-06    |
| ILMN_1796336 | 55201     | NM_018174.4    | MAP1S        | -0,60739549  | 8,683192814 | 1,42E-09    |
| ILMN_1682332 | 2995      | NM_016815.2    | GYPC         | -0,606862414 | 10,4776392  | 1,03E-07    |
| ILMN_1750130 | 2935      | NM_002094.2    | GSPT1        | -0,605765271 | 10,24370272 | 1,18E-07    |
| ILMN_3248247 | 100134634 | XM_001726406.1 | LOC100134634 | -0,60410206  | 8,51150891  | 3,72E-17    |
| ILMN_1810577 | 6191      | NM_001007.3    | RPS4X        | -0,60336637  | 11,04915316 | 2,43E-07    |
| ILMN_3211132 | 645173    | XR_017590.2    | LOC645173    | -0,602099374 | 10,28395354 | 1,79E-09    |
| ILMN_1715969 | 51312     | NM_016612.2    | SLC25A37     | -0,601423303 | 10,28168898 | 5,14E-06    |
| ILMN_3305772 | 730286    | XR_038094.1    | LOC730286    | -0,600111798 | 8,462750798 | 7,43E-15    |
| ILMN_1799028 | 10098     | NM_005723.2    | TSPAN5       | -0,597555133 | 8,255369489 | 1,20E-12    |
| ILMN_2059535 | 9647      | NM_014634.2    | PPM1F        | -0,595474001 | 9,411614622 | 5,75E-20    |
| ILMN_1707810 | 6193      | NM_001009.3    | RPS5         | -0,592463788 | 10,90730648 | 2,45E-08    |
| ILMN_1689160 | 64174     | NM_022355.1    | DPEP2        | -0,591347682 | 9,27697483  | 2,86E-18    |
| ILMN_1708934 | 133       | NM_001124.1    | ADM          | 0,587028653  | 9,965913101 | 1,85E-05    |
| ILMN_1675848 | 10627     | NM_006471.2    | MYL12A       | 0,591752327  | 11,61677809 | 3,44E-15    |
| ILMN_1664010 | 1997      | NM_172373.2    | ELF1         | 0,601047208  | 9,959324138 | 1,35E-13    |
| ILMN_1751851 | 51816     | NM_177405.1    | CECR1        | 0,607116439  | 10,50653759 | 2,98E-13    |
| ILMN_1783621 | 129607    | NM_207315.2    | CMPK2        | 0,609002261  | 7,959816718 | 4,98E-11    |
| ILMN_1791759 | 3627      | NM_001565.2    | CXCL10       | 0,6118184    | 7,916770197 | 0,0001304   |
| ILMN_2109489 | 3002      | NM_004131.3    | GZMB         | 0,615832873  | 9,375992761 | 8,59E-08    |
| ILMN_1727271 | 7453      | NM_173701.1    | WARS         | 0,61589797   | 9,086594133 | 0,000167337 |
| ILMN_3243928 | 91351     | NM_001012967.1 | DDX60L       | 0,616642976  | 8,251679133 | 5,99E-09    |
| ILMN_2412214 | 3965      | NM_009587.2    | LGALS9       | 0,621910699  | 8,881755447 | 1,08E-08    |
| ILMN_2088437 | 1524      | NM_001337.3    | CX3CR1       | 0,626358133  | 10,2952558  | 1,60E-09    |
| ILMN_1807277 | 10437     | NM_006332.3    | IFI30        | 0,627311602  | 9,46294275  | 4,08E-09    |
| ILMN_3223126 | 1890      | NM_001113756.1 | TYMP         | 0,628227751  | 8,858155468 | 8,12E-10    |
| ILMN_1748473 | 55303     | NM_018326.2    | GIMAP4       | 0,628641188  | 11,27949937 | 8,75E-13    |
| ILMN_1659047 | 8337      | NM_003516.2    | HIST2H2AA3   | 0,62897473   | 9,619535979 | 2,59E-06    |
| ILMN_2170814 | 27074     | NM_014398.2    | LAMP3        | 0,630813108  | 7,963187734 | 6,40E-05    |
| ILMN_2248970 | 4939      | NM_001032731.1 | OAS2         | 0,632467041  | 8,002406532 | 3,79E-12    |
| ILMN_2384181 | 10170     | NM_005771.3    | DHRS9        | 0,634693101  | 8,51750059  | 1,32E-12    |
| ILMN_3243061 | 100049587 | NM_001098612.1 | SIGLEC14     | 0,641781909  | 9,828922261 | 3,75E-05    |
| ILMN_1776777 | 103       | NM_001111.3    | ADAR         | 0,645368549  | 10,91740433 | 3,34E-09    |
| ILMN_1704972 | 85363     | NM_033034.1    | TRIM5        | 0,648714905  | 8,379553505 | 9,68E-12    |
| ILMN_1678766 | 6993      | NM_006519.1    | DYNLT1       | 0,651771923  | 9,093176862 | 2,24E-09    |
| ILMN_1814726 | 950       | NM_005506.2    | SCARB2       | 0,651853589  | 8,714538989 | 1,96E-16    |
| ILMN_1678422 | 79132     | NM_024119.2    | DHX58        | 0,654144602  | 8,036399271 | 2,47E-11    |
| ILMN_2374036 | 1514      | NM_145918.2    | CTSL1        | 0,654563007  | 8,224204787 | 1,27E-14    |
| ILMN_1729801 | 6279      | NM_002964.3    | S100A8       | 0,656844524  | 11,58292037 | 1,92E-07    |
| ILMN_2173975 | 64108     | NM_022147.2    | RTP4         | 0,658258813  | 8,01866817  | 1,12E-15    |
| ILMN_3295494 | 389386    | XR_037483.1    | LOC389386    | 0,658477774  | 8,191104622 | 2,26E-10    |
| ILMN_1745471 | 10379     | NM_006084.4    | IRF9         | 0,661758642  | 10,70990922 | 2,28E-17    |
| ILMN_1691436 | 644       | NM_000712.3    | BLVRA        | 0,662288658  | 8,556430452 | 2,13E-25    |
| ILMN_1769734 | 51251     | NM_001002010.1 | NT5C3        | 0,665831295  | 8,543569378 | 2,56E-09    |
| ILMN_1764709 | 9935      | NM_005461.3    | MAFB         | 0,667112213  | 8,678643628 | 1,68E-11    |

|              |           |                |              |             |             |          |
|--------------|-----------|----------------|--------------|-------------|-------------|----------|
| ILMN_2186806 | 3134      | NM_018950.1    | HLA-F        | 0,668314833 | 11,78822293 | 3,71E-14 |
| ILMN_1795181 | 55601     | NM_017631.4    | DDX60        | 0,67643212  | 8,146661005 | 9,78E-20 |
| ILMN_2337655 | 7453      | NM_004184.3    | WARS         | 0,694281854 | 9,765732777 | 6,53E-05 |
| ILMN_1709333 | 4939      | NM_016817.2    | OAS2         | 0,709838875 | 8,079916293 | 1,90E-12 |
| ILMN_3240420 | 11274     | NM_017414.3    | USP18        | 0,71574447  | 8,00081466  | 2,68E-08 |
| ILMN_2262044 | 84875     | NM_032789.1    | PARP10       | 0,718260992 | 9,000556665 | 3,32E-10 |
| ILMN_2326512 | 834       | NM_033294.2    | CASP1        | 0,727294407 | 9,385653218 | 1,07E-15 |
| ILMN_2326509 | 834       | NM_033294.2    | CASP1        | 0,733275564 | 9,406973521 | 2,97E-17 |
| ILMN_1786612 | 5721      | NM_002818.2    | PSME2        | 0,734012729 | 10,31425024 | 1,29E-22 |
| ILMN_2261600 | 2210      | NM_001017986.1 | FCGR1B       | 0,734071574 | 8,628946899 | 1,72E-07 |
| ILMN_1681721 | 8638      | NM_003733.2    | OASL         | 0,742784993 | 8,154252761 | 5,17E-09 |
| ILMN_2112301 | 10589     | NM_006442.2    | DRAP1        | 0,750449358 | 9,624155059 | 9,25E-16 |
| ILMN_1716815 | 634       | NM_001024912.1 | CEACAM1      | 0,754624556 | 8,672024665 | 1,53E-06 |
| ILMN_1701455 | 26270     | NM_018438.4    | FBXO6        | 0,760203504 | 8,379147617 | 1,06E-13 |
| ILMN_2053527 | 83666     | NM_031458.1    | PARP9        | 0,766181545 | 8,601166787 | 4,26E-14 |
| ILMN_1740466 | 55603     | NM_017633.2    | FAM46A       | 0,766608583 | 9,364189878 | 2,18E-08 |
| ILMN_1731418 | 3431      | NM_004510.2    | SP110        | 0,766811886 | 10,06425138 | 1,27E-12 |
| ILMN_1730628 | 6036      | NM_002934.2    | RNASE2       | 0,770385749 | 8,911173223 | 5,18E-14 |
| ILMN_1800078 | 4005      | NM_005574.2    | LMO2         | 0,772953926 | 9,326156383 | 2,71E-12 |
| ILMN_1703108 | 9246      | NM_004223.3    | UBE2L6       | 0,773568093 | 9,219478096 | 1,07E-09 |
| ILMN_1733998 | 10170     | NM_005771.3    | DHRS9        | 0,775380333 | 9,169491053 | 5,74E-13 |
| ILMN_2415144 | 3431      | NM_004510.2    | SP110        | 0,778420173 | 9,95136566  | 2,08E-12 |
| ILMN_1737308 | 2745      | NM_002064.1    | GLRX         | 0,79246101  | 9,662212394 | 2,15E-19 |
| ILMN_1745242 | 5359      | NM_021105.1    | PLSCR1       | 0,794619514 | 8,330436686 | 3,42E-12 |
| ILMN_1809467 | 10791     | NM_006634.2    | VAMP5        | 0,794697074 | 9,047148298 | 1,97E-12 |
| ILMN_3259146 | 100129681 | XM_001726834.1 | LOC100129681 | 0,79578657  | 9,254137229 | 6,77E-10 |
| ILMN_2109708 | 1890      | NM_001953.2    | ECGF1        | 0,800573946 | 11,98883271 | 3,28E-10 |
| ILMN_1736863 | 55281     | NM_018295.2    | TMEM140      | 0,808134669 | 9,96257708  | 2,07E-07 |
| ILMN_3219806 | 643384    | XR_016363.2    | LOC643384    | 0,815641022 | 9,924732771 | 1,10E-11 |
| ILMN_3251545 | 51510     | NM_016410.4    | CHMP5        | 0,816179326 | 8,604671032 | 1,59E-17 |
| ILMN_1659913 | 3669      | NM_002201.4    | ISG20        | 0,82552048  | 10,96825234 | 2,17E-08 |
| ILMN_1723480 | 684       | NM_004335.2    | BST2         | 0,826511401 | 9,378761755 | 4,41E-11 |
| ILMN_1687768 | 135112    | NM_181782.2    | NCOA7        | 0,832577228 | 8,559991298 | 3,83E-09 |
| ILMN_1835092 | NA        | BQ437417       |              | 0,839588577 | 8,146893495 | 1,10E-19 |
| ILMN_1654639 | 55008     | NM_017912.3    | HERC6        | 0,852297939 | 8,414812963 | 5,52E-18 |
| ILMN_1765332 | 26519     | NM_012456.2    | TIMM10       | 0,855314463 | 8,336116011 | 2,58E-11 |
| ILMN_2390162 | 51131     | NM_001040443.1 | PHF11        | 0,855491223 | 9,769174745 | 1,48E-20 |
| ILMN_1753342 | 6303      | NM_002970.1    | SAT1         | 0,869302107 | 11,69810888 | 1,76E-11 |
| ILMN_1658247 | 4938      | NM_002534.2    | OAS1         | 0,869467411 | 8,523022878 | 3,86E-08 |
| ILMN_1683678 | 26010     | NM_001100422.1 | SPATS2L      | 0,890760857 | 8,202614282 | 8,34E-12 |
| ILMN_1776723 | 51131     | NM_001040443.1 | PHF11        | 0,894524171 | 9,933285021 | 2,38E-20 |
| ILMN_2352121 | 51251     | NM_001002010.1 | NT5C3        | 0,899564387 | 9,197420415 | 6,19E-12 |
| ILMN_2370573 | 54739     | NM_199139.1    | XAF1         | 0,90302437  | 8,383157644 | 2,08E-15 |
| ILMN_2231928 | 4600      | NM_002463.1    | MX2          | 0,90465081  | 9,908021489 | 2,31E-07 |
| ILMN_1691731 | 54625     | NM_017554.1    | PARP14       | 0,921711861 | 9,155195548 | 9,26E-10 |
| ILMN_1771385 | 115361    | NM_052941.3    | GBP4         | 0,940055286 | 8,954092691 | 7,37E-09 |
| ILMN_1690105 | 6772      | NM_007315.2    | STAT1        | 0,968089198 | 9,394385904 | 2,05E-13 |
| ILMN_1736729 | 4939      | NM_002535.2    | OAS2         | 0,978594746 | 8,316972372 | 2,69E-16 |
| ILMN_1663347 | 9381      | NM_194323.1    | OTOF         | 0,999512569 | 8,232027537 | 2,09E-14 |
| ILMN_1710937 | 3428      | NM_005531.1    | IFI16        | 1,000883082 | 9,93339784  | 2,53E-16 |
| ILMN_1701621 | 9997      | NM_005138.1    | SCO2         | 1,001412807 | 8,97134367  | 1,04E-15 |
| ILMN_1751079 | 6890      | NM_000593.5    | TAP1         | 1,011239689 | 10,38168646 | 8,81E-19 |
| ILMN_2139100 | 51246     | NM_016479.3    | SHISA5       | 1,017932573 | 10,89853371 | 9,36E-22 |
| ILMN_1774874 | 3557      | NM_173843.1    | IL1RN        | 1,02199061  | 9,446498191 | 3,04E-07 |

|              |        |                |          |             |             |          |
|--------------|--------|----------------|----------|-------------|-------------|----------|
| ILMN_1689734 | 3557   | NM_173842.1    | IL1RN    | 1,022396483 | 9,3019285   | 1,63E-07 |
| ILMN_1787509 | 85441  | NM_033405.2    | PRIC285  | 1,026530956 | 9,377259904 | 1,55E-11 |
| ILMN_1653026 | 51316  | NM_016619.1    | PLAC8    | 1,036311496 | 10,25665911 | 9,66E-19 |
| ILMN_1758418 | 10673  | NM_006573.3    | TNFSF13B | 1,050399657 | 9,998121261 | 6,52E-09 |
| ILMN_1781373 | 64135  | NM_022168.2    | IFIH1    | 1,058109357 | 8,659576755 | 8,36E-15 |
| ILMN_1785732 | 7130   | NM_007115.2    | TNFAIP6  | 1,059298488 | 8,948451133 | 9,62E-10 |
| ILMN_1691364 | 6772   | NM_139266.1    | STAT1    | 1,073190839 | 10,96659429 | 1,32E-12 |
| ILMN_1777325 | 6772   | NM_007315.2    | STAT1    | 1,080031274 | 9,916301691 | 2,41E-21 |
| ILMN_1670305 | 710    | NM_001032295.1 | SERPING1 | 1,081687669 | 8,340860761 | 2,25E-10 |
| ILMN_1718558 | 64761  | NM_022750.2    | PARP12   | 1,083208342 | 8,995368968 | 8,85E-15 |
| ILMN_2093343 | 51316  | NM_016619.1    | PLAC8    | 1,098339776 | 10,26654449 | 3,07E-19 |
| ILMN_2066858 | 10673  | NM_006573.3    | TNFSF13B | 1,108297235 | 10,61940794 | 2,12E-10 |
| ILMN_1653466 | 57801  | NM_021170.2    | HES4     | 1,110435168 | 8,625483851 | 2,72E-09 |
| ILMN_2114568 | 115362 | NM_052942.2    | GBP5     | 1,122013216 | 9,401610069 | 2,63E-11 |
| ILMN_1731224 | 83666  | NM_031458.1    | PARP9    | 1,151811949 | 9,323301261 | 9,99E-18 |
| ILMN_1769520 | 9246   | NM_004223.3    | UBE2L6   | 1,162843929 | 11,32402261 | 5,84E-13 |
| ILMN_1814305 | 54809  | NM_017654.2    | SAMD9    | 1,165401116 | 9,117334207 | 3,38E-19 |
| ILMN_1690921 | 6773   | NM_005419.2    | STAT2    | 1,201861857 | 10,17799951 | 1,31E-13 |
| ILMN_1745374 | 3430   | NM_005533.2    | IFI35    | 1,21504202  | 9,215612963 | 4,56E-13 |
| ILMN_2349061 | 3665   | NM_004029.2    | IRF7     | 1,224596224 | 8,745083463 | 2,25E-15 |
| ILMN_1724139 | 114908 | NM_052932.2    | TMEM123  | 1,264336188 | 10,49284278 | 1,25E-25 |
| ILMN_1683792 | 51056  | NM_015907.2    | LAP3     | 1,270227138 | 9,25120366  | 6,39E-16 |
| ILMN_1801307 | 8743   | NM_003810.2    | TNFSF10  | 1,271937255 | 9,929154005 | 2,21E-11 |
| ILMN_1765994 | 81030  | NM_030776.1    | ZBP1     | 1,298074483 | 9,386652856 | 2,76E-14 |
| ILMN_1801246 | 8519   | NM_003641.3    | IFITM1   | 1,301161577 | 11,58925582 | 1,00E-19 |
| ILMN_1706502 | 5610   | NM_002759.1    | EIF2AK2  | 1,311816249 | 9,289789399 | 8,26E-19 |
| ILMN_1799467 | 219285 | NM_152703.2    | SAMD9L   | 1,31569086  | 9,152374394 | 1,00E-17 |
| ILMN_1779252 | 10346  | NM_006074.3    | TRIM22   | 1,350750532 | 9,566756931 | 2,22E-23 |
| ILMN_1701114 | 2633   | NM_002053.1    | GBP1     | 1,367021837 | 9,141417527 | 8,94E-16 |
| ILMN_1691156 | 4489   | NM_005946.2    | MT1A     | 1,588099508 | 9,945051064 | 5,11E-12 |
| ILMN_2148785 | 2633   | NM_002053.1    | GBP1     | 1,652750292 | 9,788693202 | 1,04E-18 |
| ILMN_1674811 | 8638   | NM_198213.1    | OASL     | 1,678871156 | 9,19617466  | 2,28E-15 |
| ILMN_1798181 | 3665   | NM_004029.2    | IRF7     | 1,763426617 | 10,33888089 | 2,42E-15 |
| ILMN_1745397 | 4940   | NM_006187.2    | OAS3     | 1,814881282 | 9,157653963 | 2,22E-18 |
| ILMN_1675640 | 4938   | NM_001032409.1 | OAS1     | 1,841839437 | 9,422582851 | 5,04E-21 |
| ILMN_1742618 | 54739  | NM_199139.1    | XAF1     | 1,855563647 | 9,799098112 | 9,47E-29 |
| ILMN_1687384 | 2537   | NM_022873.2    | IFI6     | 1,920510013 | 11,51819674 | 1,62E-25 |
| ILMN_1664543 | 3437   | NM_001031683.1 | IFIT3    | 1,949858918 | 9,340597495 | 2,00E-19 |
| ILMN_2410826 | 4938   | NM_001032409.1 | OAS1     | 1,969922901 | 9,542106883 | 1,29E-22 |
| ILMN_1739428 | 3433   | NM_001547.4    | IFIT2    | 2,063362349 | 11,13344291 | 1,30E-20 |
| ILMN_1674063 | 4939   | NM_016817.2    | OAS2     | 2,082168906 | 10,44494827 | 3,88E-24 |
| ILMN_2239754 | 3437   | NM_001549.2    | IFIT3    | 2,170369291 | 10,04801514 | 1,22E-22 |
| ILMN_1729749 | 51191  | NM_016323.2    | HERC5    | 2,221454767 | 10,16081991 | 5,63E-19 |
| ILMN_2347798 | 2537   | NM_022872.2    | IFI6     | 2,293082318 | 10,37338612 | 1,73E-22 |
| ILMN_1701789 | 3437   | NM_001031683.1 | IFIT3    | 2,329062395 | 10,10359673 | 1,16E-20 |
| ILMN_1662358 | 4599   | NM_002462.2    | MX1      | 2,339669439 | 11,59206363 | 9,90E-28 |
| ILMN_1760062 | 10561  | NM_006417.3    | IFI44    | 2,414594587 | 9,613238894 | 2,79E-36 |
| ILMN_2388547 | 94240  | NM_033255.2    | EPSTI1   | 2,470387279 | 10,26677337 | 7,79E-36 |
| ILMN_1657871 | 91543  | NM_080657.4    | RSAD2    | 2,522601824 | 9,604186356 | 4,54E-22 |
| ILMN_1695404 | 4061   | NM_002346.1    | LY6E     | 2,727461271 | 11,79369241 | 8,67E-52 |
| ILMN_2054019 | 9636   | NM_005101.1    | ISG15    | 2,765050279 | 10,12319327 | 1,42E-22 |
| ILMN_1707695 | 3434   | NM_001548.3    | IFIT1    | 2,772827094 | 10,41005803 | 2,25E-27 |
| ILMN_1805750 | 10410  | NM_021034.2    | IFITM3   | 2,87202849  | 12,00608677 | 8,60E-33 |
| ILMN_1723912 | 10964  | NM_006820.1    | IFI44L   | 3,148803279 | 10,16068476 | 2,86E-36 |

ILMN\_2058782

3429

NM\_005532.3

IFI27

3,974087743 10,59696181

6,38E-53
