# Supplementary material for: Of mice and men: the host response to influenza virus infection
Source: PubMed Central journal article supplement (PMC6132725; doi:10.1007/s00335-018-9750-y), 2018-06-15
Supplement: 335_2018_9750_MOESM10_ESM.pdf [file 335_2018_9750_MOESM10_ESM.pdf]

| ProbeID       | EntrezGeneID | GeneSymbol | EnsemblID       | logFC       | AveExpr     | adj.P.Val   |
|---------------|--------------|------------|-----------------|-------------|-------------|-------------|
| A_24_P270460  | 3429         | IFI27      | ENST00000614648 | 6,257478286 | 12,35123875 | 2,65E-09    |
| A_24_P28722   | 91543        | RSAD2      | ENST00000382040 | 2,944864219 | 10,92596736 | 0,000763662 |
| A_23_P45871   | 10964        | IFI44L     | ENST00000476521 | 2,816445057 | 10,40212251 | 0,001685274 |
| A_23_P23074   | 10561        | IFI44      | ENST00000485662 | 2,527650143 | 10,24651081 | 0,000629558 |
| A_33_P3270451 | 81567        | TXNDC5     | ENST00000439343 | 2,375818842 | 8,833780228 | 0,002074862 |
| A_23_P52266   | 3434         | IFIT1      | ENST00000371804 | 2,365883703 | 11,3138445  | 0,004620893 |
| A_23_P819     | 9636         | ISG15      | ENST00000379389 | 2,324864708 | 13,47354412 | 0,002871155 |
| A_33_P3257678 | 333932       | HIST2H3A   | ENST00000369158 | 2,310010298 | 8,997379827 | 6,42E-05    |
| A_23_P105794  | 94240        | EPSTI1     | ENST00000476830 | 2,142969035 | 8,870419654 | 6,59E-05    |
| A_23_P107421  | 7083         | TK1        | ENST00000301634 | 2,130194223 | 10,48616632 | 1,23E-05    |
| A_23_P118815  | 332          | BIRC5      | ENST00000301633 | 2,108317304 | 8,251930048 | 3,32E-05    |
| A_23_P118815  | 332          | BIRC5      | ENST00000301633 | 2,071583766 | 8,087570969 | 3,27E-05    |
| A_23_P139786  | 8638         | OASL       | ENST00000257570 | 2,058592341 | 11,02249251 | 0,000424949 |
| A_23_P58266   | 6286         | S100P      | ENST00000296370 | 2,048259371 | 12,99440848 | 0,012264985 |
| A_23_P50096   | 7298         | TYMS       | ENST00000581920 | 2,031754153 | 8,388210603 | 7,00E-05    |
| A_23_P118815  | 332          | BIRC5      | ENST00000301633 | 2,019296277 | 8,066779068 | 4,48E-05    |
| A_24_P304071  | 3433         | IFIT2      | ENST00000611722 | 2,003544772 | 11,44364669 | 0,000862597 |
| A_23_P118815  | 332          | BIRC5      | ENST00000301633 | 2,003358633 | 8,148784983 | 5,03E-05    |
| A_23_P118815  | 332          | BIRC5      | ENST00000301633 | 2,001854214 | 8,108876566 | 5,84E-05    |
| A_33_P3283611 | 3437         | IFIT3      | ENST00000371818 | 1,994893745 | 11,76424845 | 0,004196077 |
| A_23_P165624  | 7130         | TNFAIP6    | ENST00000460812 | 1,990450953 | 9,946359949 | 1,43E-05    |
| A_23_P118815  | 332          | BIRC5      | ENST00000301633 | 1,98886821  | 8,081836618 | 5,62E-05    |
| A_23_P118815  | 332          | BIRC5      | ENST00000301633 | 1,985054415 | 8,082820696 | 5,40E-05    |
| A_23_P118815  | 332          | BIRC5      | ENST00000301633 | 1,980398152 | 8,071630711 | 5,62E-05    |
| A_23_P118815  | 332          | BIRC5      | ENST00000301633 | 1,972937179 | 8,080495482 | 6,89E-05    |
| A_24_P335305  | 4940         | OAS3       | ENST00000228928 | 1,961296385 | 9,421855509 | 0,005263153 |
| A_23_P118815  | 332          | BIRC5      | ENST00000301633 | 1,950975285 | 8,145700012 | 7,00E-05    |
| A_23_P65757   | 9133         | CCNB2      | ENST00000621385 | 1,931854168 | 7,927817943 | 6,10E-05    |
| A_23_P137366  | 713          | C1QB       | ENST00000314933 | 1,853796831 | 8,243358673 | 0,000889354 |
| A_23_P17481   | 6614         | SIGLEC1    | ENST00000344754 | 1,850220152 | 7,413576244 | 0,002228749 |
| A_24_P317762  | 4061         | LY6E       | ENST00000522024 | 1,835152794 | 11,35332732 | 0,005979722 |
| A_23_P253791  | 820          | CAMP       | ENST00000296435 | 1,833334862 | 11,45515576 | 0,018895912 |
| A_23_P206760  | 3240         | HP         | ENST00000566821 | 1,824794733 | 10,90749996 | 0,012453462 |
| A_23_P370682  | 116071       | BATF2      | ENST00000527454 | 1,809349707 | 9,411509125 | 0,001424593 |
| A_23_P201459  | 2537         | IFI6       | ENST00000362020 | 1,782125086 | 11,35230603 | 0,003796519 |
| A_23_P151637  | 6036         | RNASE2     | ENST00000304625 | 1,770873188 | 9,950319811 | 0,00048109  |
| A_33_P3401826 | 129607       | CMPK2      | ENST00000478738 | 1,763800263 | 9,5644862   | 0,009995386 |
| A_23_P167168  | 3512         | IGJ        | ENST00000543780 | 1,753318646 | 9,480226541 | 0,005473513 |
| A_23_P64828   | 4938         | OAS1       | ENST00000549820 | 1,750982514 | 9,32212311  | 0,001246782 |
| A_33_P3319967 | 383          | ARG1       | ENST00000356962 | 1,731191129 | 8,045425973 | 0,005188418 |
| A_23_P104651  | 113130       | CDCA5      | ENST00000275517 | 1,728025674 | 7,728931022 | 3,32E-05    |
| A_23_P434809  | 6279         | S100A8     | ENST00000368733 | 1,727848741 | 16,36796604 | 7,03E-05    |
| A_23_P84596   | 51237        | MZB1       | ENST00000503351 | 1,720497846 | 9,825160324 | 0,009071715 |
| A_23_P17663   | 4599         | MX1        | ENST00000455164 | 1,709885441 | 12,78661363 | 0,021153415 |
| A_23_P141173  | 4353         | MPO        | ENST00000225275 | 1,70810179  | 8,625572204 | 0,02572142  |
| A_23_P117852  | 9768         | KIAA0101   | ENST00000300035 | 1,701791669 | 7,64702773  | 0,000667768 |
| A_23_P167328  | 952          | CD38       | ENST00000502843 | 1,687999736 | 8,951974698 | 8,44E-05    |
| A_33_P3352382 | 383          | ARG1       | ENST00000356962 | 1,686280427 | 8,045552377 | 0,005128552 |
| A_23_P166848  | 4057         | LTF        | ENST00000426532 | 1,668983116 | 10,13049142 | 0,09046657  |
| A_23_P75769   | 51338        | MS4A4A     | ENST00000529991 | 1,668799452 | 8,818885707 | 6,42E-05    |
| A_23_P132159  | 11274        | USP18      | ENST00000215794 | 1,651400604 | 8,110604251 | 0,01153739  |
| A_24_P557479  | 54739        | XAF1       | ENST00000361842 | 1,627473275 | 10,58278987 | 0,003507829 |

|                |                 |                 |             |             |             |
|----------------|-----------------|-----------------|-------------|-------------|-------------|
| A_23_P139123   | 710 SERPING1    | ENST00000531133 | 1,622389999 | 7,855447526 | 0,005541963 |
| A_33_P3413989  | 710 SERPING1    | ENST00000405496 | 1,604979929 | 7,860549858 | 0,00788188  |
| A_33_P3258346  | 54739 XAF1      | ENST00000576724 | 1,601044149 | 9,18658907  | 0,002503771 |
| A_23_P117852   | 9768 KIAA0101   | ENST00000300035 | 1,595327013 | 7,577495893 | 0,001002298 |
| A_23_P74001    | 6283 S100A12    | ENST00000368737 | 1,595261619 | 14,09042841 | 0,0008398   |
| A_22_P00013137 | 643332 ECRP     | NA              | 1,56953289  | 8,329685384 | 0,000380289 |
| A_33_P3289236  | 3250 HPR        | ENST00000356967 | 1,560049331 | 9,709529154 | 0,011757148 |
| A_23_P259141   | 81030 ZBP1      | ENST00000461547 | 1,559468195 | 10,5665657  | 0,000455869 |
| A_33_P3385785  | 6283 S100A12    | ENST00000368737 | 1,554763022 | 13,29623173 | 0,00134545  |
| A_23_P117852   | 9768 KIAA0101   | ENST00000300035 | 1,540566982 | 7,468770934 | 0,001104415 |
| A_23_P259863   | 57126 CD177     | ENST00000618265 | 1,533809253 | 7,579615712 | 0,039319292 |
| A_23_P117852   | 9768 KIAA0101   | ENST00000300035 | 1,528099888 | 7,439131341 | 0,001124636 |
| A_23_P110196   | 51191 HERC5     | ENST00000502913 | 1,511854256 | 8,914590376 | 0,00863065  |
| A_33_P3386262  | 81620 CDT1      | ENST00000301019 | 1,511339395 | 7,385830816 | 6,53E-05    |
| A_23_P250385   | 3009 HIST1H1B   | ENST00000331442 | 1,510991914 | 7,611203159 | 0,000195013 |
| A_32_P108254   | 54757 FAM20A    | ENST00000375556 | 1,507097764 | 7,364646463 | 0,000677632 |
| A_23_P117852   | 9768 KIAA0101   | ENST00000300035 | 1,498413546 | 7,516609388 | 0,001577108 |
| A_24_P261929   | 122509 IFI27L1  | ENST00000393115 | 1,495989069 | 9,988492514 | 1,50E-05    |
| A_23_P117852   | 9768 KIAA0101   | ENST00000300035 | 1,493415345 | 7,462195213 | 0,001428342 |
| A_23_P117852   | 9768 KIAA0101   | ENST00000300035 | 1,484794103 | 7,364166741 | 0,001252098 |
| A_33_P3400389  | 26010 SPATS2L   | ENST00000409718 | 1,483561277 | 8,360128106 | 0,008614181 |
| A_23_P117852   | 9768 KIAA0101   | ENST00000300035 | 1,475961769 | 7,479934776 | 0,001491537 |
| A_23_P117852   | 9768 KIAA0101   | ENST00000300035 | 1,473050283 | 7,370002718 | 0,001166398 |
| A_23_P169437   | 3934 LCN2       | ENST00000373017 | 1,468428705 | 9,360433929 | 0,049154766 |
| A_23_P117852   | 9768 KIAA0101   | ENST00000300035 | 1,464160186 | 7,420574853 | 0,001412029 |
| A_23_P142750   | 5610 EIF2AK2    | ENST00000395127 | 1,457863671 | 11,36179841 | 0,000612079 |
| A_33_P3350863  | 56729 RETN      | ENST00000221515 | 1,408967208 | 10,61041963 | 0,02920101  |
| A_23_P330561   | 199675 MCEMP1   | ENST00000333598 | 1,399519712 | 11,0859135  | 0,002773045 |
| A_23_P168229   | 81567 TXNDC5    | ENST00000439343 | 1,395940305 | 9,052581842 | 0,017031044 |
| A_23_P121716   | 306 ANXA3       | ENST00000505805 | 1,388820862 | 9,717561326 | 0,006759563 |
| A_23_P104471   | 51207 DUSP13    | ENST00000607131 | 1,381007194 | 7,386607972 | 9,49E-05    |
| A_33_P3387831  | 79019 CENPM     | ENST00000402338 | 1,376817471 | 8,91029623  | 0,000736154 |
| A_33_P3379039  | 100423062 IGLL5 | ENST00000390321 | 1,376385786 | 13,70275686 | 0,080710885 |
| A_21_P0014172  | 8365 HIST1H4H   | NA              | 1,369801954 | 8,948446571 | 3,32E-05    |
| A_24_P378019   | 3665 IRF7       | ENST00000330243 | 1,356991558 | 13,4615153  | 0,006987419 |
| A_23_P204087   | 4939 OAS2       | ENST00000620097 | 1,355014977 | 8,683874395 | 0,010303292 |
| A_24_P239076   | 3543 IGLL1      | ENST00000412472 | 1,347989721 | 12,90200688 | 0,073765822 |
| A_33_P3224858  | 5610 EIF2AK2    | ENST00000390013 | 1,344769845 | 8,654121554 | 0,000199224 |
| A_33_P3226810  | 8743 TNFSF10    | ENST00000241261 | 1,343679586 | 12,2343938  | 9,46E-05    |
| A_23_P119222   | 56729 RETN      | ENST00000221515 | 1,340660682 | 9,327104791 | 0,031338097 |
| A_33_P3743432  | 449491 DEFA8P   | ENST00000457582 | 1,321632646 | 6,907902175 | 0,043900885 |
| A_33_P3352578  | 338339 CLEC4D   | ENST00000382064 | 1,311448793 | 8,991657128 | 0,000135065 |
| A_32_P44394    | 9447 AIM2       | ENST00000612470 | 1,309569562 | 9,536905616 | 0,000726332 |
| A_24_P297539   | 11065 UBE2C     | ENST00000617055 | 1,297436967 | 7,97006866  | 0,000124577 |
| A_24_P318656   | 3690 ITGB3      | ENST00000559488 | 1,290553164 | 9,431266288 | 0,022576072 |
| A_23_P155765   | 3148 HMGB2      | ENST00000511316 | 1,286050211 | 10,13278612 | 0,000594114 |
| A_23_P81859    | 85235 HIST1H2AH | NA              | 1,270351487 | 11,78686371 | 4,61E-06    |
| A_24_P192805   | 440068 CARD17   | ENST00000375707 | 1,269236755 | 9,454708168 | 7,00E-05    |
| A_23_P166797   | 64108 RTP4      | ENST00000259030 | 1,261597473 | 10,08739756 | 0,01302563  |
| A_23_P122863   | 2887 GRB10      | ENST00000402497 | 1,259184848 | 8,162154216 | 0,003592543 |
| A_21_P0010536  | 2635 GBP3       | ENST00000394662 | 1,252038816 | 9,295341734 | 0,003098066 |
| A_23_P41114    | 1475 CSTA       | ENST00000264474 | 1,248712829 | 9,715712756 | 0,001026768 |
| A_33_P3225512  | 4939 OAS2       | ENST00000620097 | 1,24723009  | 8,580589045 | 0,021150196 |

|                |                   |                 |             |             |             |
|----------------|-------------------|-----------------|-------------|-------------|-------------|
| A_23_P132388   | 9997 SCO2         | ENST00000252785 | 1,235083503 | 11,48522731 | 0,00119466  |
| A_23_P67847    | 79623 GALNT14     | ENST00000349752 | 1,233783805 | 8,732436337 | 0,010303292 |
| A_23_P106844   | 4502 MT2A         | ENST00000562017 | 1,231127624 | 14,6898297  | 0,01070432  |
| A_33_P3402489  | 4940 OAS3         | ENST00000228928 | 1,225959896 | 7,100083974 | 0,00553533  |
| A_23_P57379    | 8318 CDC45        | ENST00000493724 | 1,219971788 | 7,698329858 | 7,00E-05    |
| A_33_P3807062  | 55355 HJURP       | ENST00000433484 | 1,210420323 | 7,012045163 | 0,000674994 |
| A_23_P309381   | 723790 HIST2H2AA4 | ENST00000607355 | 1,209614769 | 10,27550987 | 0,0003415   |
| A_33_P3413987  | 710 SERPING1      | ENST00000278407 | 1,208981961 | 7,721301428 | 0,013003359 |
| A_23_P118246   | 51659 GINS2       | ENST00000253462 | 1,205495553 | 7,151313181 | 0,000502401 |
| A_23_P102235   | 6637 SNRPG        | ENST00000429728 | 1,201966973 | 9,243705561 | 0,000307274 |
| A_23_P93258    | 8358 HIST1H3B     | ENST00000621411 | 1,200410691 | 10,74736778 | 0,000609906 |
| A_24_P217848   | 8330 HIST1H2AK    | ENST00000618958 | 1,194466972 | 12,14477613 | 4,61E-06    |
| A_23_P23048    | 6280 S100A9       | ENST00000368738 | 1,194251412 | 15,35079489 | 0,000208971 |
| A_23_P428184   | 3013 HIST1H2AD    | ENST00000341023 | 1,183346263 | 12,80974927 | 0,00019119  |
| A_23_P152002   | 597 BCL2A1        | ENST00000267953 | 1,176713685 | 9,28622855  | 0,001048109 |
| A_33_P3211666  | 8809 IL18R1       | ENST00000334376 | 1,172750073 | 8,550331123 | 0,004743598 |
| A_24_P117410   | 113730 KLHDC7B    | ENST00000395676 | 1,171929024 | 8,758303546 | 0,001372954 |
| A_33_P3298810  | 2865 FFAR3        | ENST00000327809 | 1,169627029 | 7,511052555 | 0,003716161 |
| A_33_P3326235  | 3042 HBM          | ENST00000472539 | 1,169463101 | 15,40658868 | 0,00467174  |
| A_24_P66027    | 9582 APOBEC3B     | ENST00000335760 | 1,168883936 | 11,72249633 | 0,00058366  |
| A_33_P3342628  | 57801 HES4        | ENST00000304952 | 1,167563349 | 10,41219697 | 0,062396292 |
| A_23_P118246   | 51659 GINS2       | ENST00000253462 | 1,160198037 | 7,069972788 | 0,000403025 |
| A_33_P3263666  | 122416 ANKRD9     | ENST00000559651 | 1,159596873 | 9,721427109 | 0,014970461 |
| A_23_P42353    | 51513 ETV7        | ENST00000339796 | 1,159516812 | 8,036372957 | 0,036080788 |
| A_23_P68155    | 64135 IFIH1       | ENST00000263642 | 1,150819457 | 10,53421358 | 0,007760916 |
| A_22_P00000867 | 375790 AGRN       | ENST00000461111 | 1,150772273 | 8,215603971 | 0,019953418 |
| A_23_P48056    | 10970 CKAP4       | ENST00000378026 | 1,145389489 | 10,13637186 | 5,72E-06    |
| A_23_P74609    | 50486 GOS2        | ENST00000367029 | 1,140685925 | 7,684468447 | 0,000919767 |
| A_23_P118246   | 51659 GINS2       | ENST00000253462 | 1,138186223 | 7,117094658 | 0,000269187 |
| A_22_P00017844 | 54877 ZCCHC2      | ENST00000585873 | 1,134511642 | 9,58487229  | 0,003128636 |
| A_33_P3360216  | 8329 HIST1H2AI    | ENST00000358739 | 1,131458188 | 7,5716605   | 0,000475296 |
| A_23_P30950    | 116369 SLC26A8    | ENST00000465492 | 1,130738812 | 7,188386869 | 0,000395484 |
| A_33_P3344086  | 8331 HIST1H2AJ    | ENST00000333151 | 1,129338045 | 12,06992584 | 3,53E-05    |
| A_24_P320328   | 10923 SUB1        | ENST00000511988 | 1,1269065   | 8,708974823 | 0,000504918 |
| A_23_P206724   | 4493 MT1E         | ENST00000306061 | 1,125270485 | 10,85477875 | 0,002640481 |
| A_23_P7636     | 9232 PTTG1        | ENST00000520452 | 1,120725518 | 9,572280554 | 0,001147221 |
| A_23_P64173    | 114769 CARD16     | ENST00000525374 | 1,110877183 | 10,32417385 | 8,68E-05    |
| A_21_P0010728  | 2210 FCGR1B       | ENST00000579737 | 1,1101405   | 10,12510072 | 0,008315538 |
| A_33_P3241269  | 1066 CES1         | ENST00000421606 | 1,104044195 | 10,84496297 | 0,042466203 |
| A_23_P63789    | 11130 ZWINT       | ENST00000489649 | 1,101266062 | 7,249829674 | 0,001621692 |
| A_23_P215913   | 1191 CLU          | ENST00000405140 | 1,100800032 | 10,02794369 | 0,012901704 |
| A_32_P221799   | 8336 HIST1H2AM    | NA              | 1,095333182 | 7,975976181 | 0,000120197 |
| A_23_P60248    | 7295 TXN          | ENST00000487892 | 1,093390526 | 11,59383933 | 0,000276392 |
| A_23_P88731    | 5888 RAD51        | ENST00000525066 | 1,091771042 | 7,170254105 | 0,000446292 |
| A_23_P118246   | 51659 GINS2       | ENST00000253462 | 1,091734846 | 7,00021907  | 0,000491843 |
| A_24_P222655   | 712 C1QA          | ENST00000374642 | 1,090684901 | 7,60948986  | 0,010620262 |
| A_23_P427703   | 4500 MT1L         | ENST00000565768 | 1,090608638 | 12,04689578 | 0,00973636  |
| A_23_P69109    | 5359 PLSCR1       | ENST00000493432 | 1,088765992 | 9,519935525 | 0,010149114 |
| A_23_P59045    | 3012 HIST1H2AE    | NA              | 1,085045659 | 10,44366857 | 3,80E-05    |
| A_23_P37983    | 4490 MT1B         | ENST00000334346 | 1,084962497 | 11,88020283 | 0,010830022 |
| A_23_P152782   | 3430 IFI35        | ENST00000538473 | 1,084262317 | 10,18850484 | 0,009753967 |
| A_23_P401      | 1063 CENPF        | ENST00000366955 | 1,081187812 | 7,479956581 | 0,000798876 |
| A_23_P8185     | 6993 DYNLT1       | ENST00000367088 | 1,080009916 | 11,66467929 | 1,04E-05    |

|                |                 |                 |             |             |             |
|----------------|-----------------|-----------------|-------------|-------------|-------------|
| A_23_P29124    | 2812 GP1BB      | ENST00000366425 | 1,078863545 | 13,06887443 | 0,017438088 |
| A_23_P122197   | 891 CCNB1       | ENST00000256442 | 1,078757454 | 7,390499281 | 0,001894439 |
| A_23_P118246   | 51659 GINS2     | ENST00000253462 | 1,077085061 | 7,027371482 | 0,000633018 |
| A_33_P3340847  | 84674 CARD6     | ENST00000254691 | 1,074221189 | 8,560455382 | 5,72E-06    |
| A_23_P34788    | 11004 KIF2C     | ENST00000372217 | 1,072233567 | 7,095247583 | 0,000398703 |
| A_23_P37736    | 608 TNFRSF17    | ENST00000053243 | 1,069870522 | 7,048942522 | 0,016069903 |
| A_23_P126613   | 89872 AQP10     | ENST00000484864 | 1,068156578 | 8,427268117 | 0,016654503 |
| A_23_P30069    | 91351 DDX60L    | ENST00000511577 | 1,06730446  | 9,938664414 | 0,001134028 |
| A_23_P101992   | 8685 MARCO      | ENST00000494979 | 1,066942454 | 9,814731575 | 0,015753572 |
| A_32_P9543     | 200315 APOBEC3A | ENST00000402255 | 1,064200111 | 11,93678667 | 0,007415002 |
| A_33_P3308105  | 8836 GGH        | ENST00000260118 | 1,06125829  | 8,033695979 | 0,002547034 |
| A_33_P3258977  | 338339 CLEC4D   | ENST00000299665 | 1,05925446  | 8,035558984 | 0,000380289 |
| A_23_P23221    | 1647 GADD45A    | ENST00000370986 | 1,058363362 | 8,806639259 | 0,0006601   |
| A_32_P105549   | 728113 ANXA8L1  | ENST00000584982 | 1,053177598 | 7,001466573 | 0,003386396 |
| A_23_P423331   | 84628 NTNG2     | ENST00000393229 | 1,05271695  | 11,27394782 | 0,000401142 |
| A_23_P63390    | 2210 FCGR1B     | ENST00000466915 | 1,050811036 | 11,95754884 | 0,018709838 |
| A_23_P59877    | 2171 FABP5      | ENST00000524732 | 1,048785374 | 7,911537662 | 0,000229335 |
| A_21_P0000197  | 8969 HIST1H2AG  | ENST00000359193 | 1,048498163 | 8,058575385 | 0,001916136 |
| A_33_P3399571  | 8876 VNN1       | ENST00000367928 | 1,044430852 | 8,974570326 | 0,014585531 |
| A_24_P208567   | 8809 IL18R1     | ENST00000409599 | 1,044044422 | 8,553390683 | 0,006595939 |
| A_23_P385861   | 157313 CDCA2    | ENST00000521098 | 1,039503333 | 6,711530035 | 0,000480579 |
| A_33_P3251876  | 8809 IL18R1     | ENST00000410040 | 1,036683489 | 7,657533857 | 0,004708581 |
| A_23_P118246   | 51659 GINS2     | ENST00000253462 | 1,0362109   | 6,964635822 | 0,000605418 |
| A_23_P118246   | 51659 GINS2     | ENST00000253462 | 1,036180163 | 6,975300646 | 0,000774949 |
| A_23_P18604    | 51056 LAP3      | ENST00000606142 | 1,033533639 | 9,875758404 | 0,030267072 |
| A_24_P38081    | 2289 FKBP5      | ENST00000357266 | 1,033396665 | 8,574015716 | 0,001687678 |
| A_24_P462899   | 387103 CENPW    | ENST00000368325 | 1,031731926 | 7,401447951 | 0,000354876 |
| A_23_P210425   | 10398 MYL9      | ENST00000346786 | 1,029734091 | 8,196491288 | 0,033240106 |
| A_23_P373119   | 128872 HMGB3P1  | ENST00000393368 | 1,026260719 | 6,90688634  | 0,000674994 |
| A_22_P00010235 | 4490 MT1B       | ENST00000334346 | 1,01896751  | 11,93278722 | 0,006580235 |
| A_23_P118246   | 51659 GINS2     | ENST00000253462 | 1,014049141 | 6,939810224 | 0,000594212 |
| A_23_P118246   | 51659 GINS2     | ENST00000253462 | 1,013584048 | 6,947883549 | 0,000685132 |
| A_33_P3323847  | 9401 RECQL4     | ENST00000617875 | 1,008258446 | 8,248677517 | 0,000589802 |
| A_33_P3212679  | 6637 SNRPG      | ENST00000429728 | 1,007163205 | 10,05604529 | 0,000573467 |
| A_23_P162300   | 11213 IRAK3     | ENST00000261233 | 1,003408061 | 8,73722605  | 0,000489927 |
| A_23_P64343    | 26519 TIMM10    | ENST00000525158 | 1,001876192 | 9,815343629 | 0,001650009 |
| A_33_P3265030  | 2812 GP1BB      | ENST00000431044 | 1,000759702 | 14,21411351 | 0,021712135 |
| A_33_P3350488  | 51203 NUSAP1    | ENST00000414849 | 0,999816924 | 7,274650889 | 0,000507564 |
| A_23_P118246   | 51659 GINS2     | ENST00000253462 | 0,997102525 | 6,889315036 | 0,000633623 |
| A_23_P120435   | 140686 WFDC3    | ENST00000467679 | 0,996696748 | 9,497437334 | 0,002876881 |
| A_23_P80032    | 1869 E2F1       | ENST00000343380 | 0,992388295 | 6,936869113 | 9,98E-06    |
| A_23_P150935   | 10024 TROAP     | ENST00000257909 | 0,992289398 | 7,588475503 | 9,35E-05    |
| A_23_P71148    | 644 BLVRA       | ENST00000265523 | 0,990010588 | 12,18231709 | 0,002782685 |
| A_24_P124992   | 5685 PSMA4      | ENST00000557929 | 0,988487536 | 9,467078448 | 0,000293919 |
| A_33_P3304983  | 5577 PRKAR2B    | ENST00000393613 | 0,985876632 | 10,64409656 | 0,025418413 |
| A_23_P106042   | 116173 CMTM5    | ENST00000553750 | 0,985746777 | 9,27687029  | 0,029293369 |
| A_23_P8640     | 2852 GPER1      | ENST00000617001 | 0,983134203 | 7,774620181 | 0,008634833 |
| A_33_P3344127  | 8334 HIST1H2AC  | ENST00000602637 | 0,979983142 | 9,261024796 | 3,32E-05    |
| A_23_P50108    | 10403 NDC80     | ENST00000261597 | 0,979928058 | 7,917834364 | 8,11E-05    |
| A_23_P140146   | 83982 IFI27L2   | ENST00000554909 | 0,970341359 | 10,59357459 | 1,16E-05    |
| A_33_P3260605  | 8727 CTNNA1     | ENST00000374593 | 0,970074706 | 7,865160798 | 0,005470224 |
| A_23_P64372    | 6947 TCN1       | ENST00000257264 | 0,968012229 | 8,278273872 | 0,081193887 |
| A_23_P74115    | 8438 RAD54L     | ENST00000371975 | 0,967831808 | 6,74955475  | 0,000134749 |

|                |                    |                 |             |             |             |
|----------------|--------------------|-----------------|-------------|-------------|-------------|
| A_23_P72737    | 8519 IFITM1        | ENST00000408968 | 0,967310048 | 15,83541154 | 0,005128208 |
| A_23_P80032    | 1869 E2F1          | ENST00000343380 | 0,96721882  | 6,937435833 | 1,06E-05    |
| A_24_P399888   | 79019 CENPM        | ENST00000396437 | 0,967088797 | 6,698349573 | 0,000692526 |
| A_23_P80032    | 1869 E2F1          | ENST00000343380 | 0,965417851 | 6,928828748 | 8,83E-06    |
| A_23_P31671    | 7381 UQCRB         | ENST00000521948 | 0,964054339 | 9,440285845 | 0,016496767 |
| A_23_P80032    | 1869 E2F1          | ENST00000343380 | 0,963948368 | 6,931095144 | 1,06E-05    |
| A_23_P327140   | 57674 RNF213       | ENST00000560083 | 0,963614138 | 8,43507391  | 0,004487548 |
| A_23_P38346    | 79132 DHX58        | ENST00000251642 | 0,963526509 | 10,76833193 | 0,046973976 |
| A_23_P25155    | 53831 GPR84        | ENST00000551809 | 0,96319063  | 7,314420654 | 0,002517419 |
| A_21_P0012079  | 541471 MIR4435-1HG | ENST00000409569 | 0,961752259 | 11,71806482 | 0,000198132 |
| A_33_P3392077  | 9540 TP53I3        | ENST00000238721 | 0,960131427 | 8,959956034 | 0,0008398   |
| A_33_P3263170  | 6637 SNRPG         | ENST00000429728 | 0,958137586 | 10,4532688  | 0,001212779 |
| A_33_P3286278  | 2896 GRN           | ENST00000053867 | 0,955618765 | 16,01167882 | 0,001146714 |
| A_32_P54553    | 373856 USP41       | ENST00000454608 | 0,955392646 | 6,771502533 | 0,015036589 |
| A_33_P3315314  | 645745 MT1HL1      | ENST00000464121 | 0,953513977 | 11,13450684 | 0,012031299 |
| A_33_P3423941  | 8519 IFITM1        | ENST00000408968 | 0,950568508 | 14,71027679 | 0,007027954 |
| A_23_P138507   | 983 CDK1           | ENST00000448257 | 0,945172744 | 6,63244864  | 0,00134685  |
| A_33_P3413597  | 4709 NDUFB3        | ENST00000433898 | 0,944717775 | 10,49152261 | 0,000209418 |
| A_23_P10385    | 51514 DTL          | ENST00000475419 | 0,944130261 | 6,632551678 | 0,000173477 |
| A_23_P255104   | 10184 LHFPL2       | ENST00000380345 | 0,939664422 | 8,526245883 | 0,000390951 |
| A_23_P32500    | 23166 STAB1        | ENST00000462741 | 0,939481855 | 8,508198126 | 0,001205332 |
| A_23_P80032    | 1869 E2F1          | ENST00000343380 | 0,93692921  | 6,899072771 | 1,68E-05    |
| A_23_P17130    | 84281 C2orf88      | ENST00000450357 | 0,936470275 | 8,601568704 | 0,047530917 |
| A_23_P124417   | 699 BUB1           | ENST00000302759 | 0,936449181 | 6,648077397 | 0,000909602 |
| A_23_P83278    | 51510 CHMP5        | ENST00000223500 | 0,936018685 | 9,401968351 | 0,000758487 |
| A_23_P159650   | 1349 COX7B         | ENST00000373335 | 0,93517371  | 9,373864615 | 0,013908102 |
| A_23_P105012   | 54979 HRASLS2      | ENST00000255695 | 0,927349558 | 6,860956257 | 0,008335414 |
| A_23_P66241    | 4499 MT1M          | ENST00000379818 | 0,92703462  | 7,223427083 | 8,49E-05    |
| A_33_P3397599  | 79168 LILRA6       | ENST00000430421 | 0,925075223 | 12,02746267 | 0,001847953 |
| A_22_P00010386 | 140465 MYL6B       | ENST00000548571 | 0,924255825 | 8,191373684 | 8,09E-05    |
| A_23_P71727    | 1164 CKS2          | ENST00000314355 | 0,92380329  | 8,078438708 | 0,001857714 |
| A_23_P25735    | 5687 PSMA6         | ENST00000554541 | 0,922582041 | 11,13318594 | 0,000729464 |
| A_23_P358944   | 5371 PML           | ENST00000435786 | 0,920165266 | 11,47149533 | 0,024902512 |
| A_33_P3363420  | 257019 FRMD3       | ENST00000621208 | 0,919003132 | 8,135520099 | 0,005078031 |
| A_33_P3357609  | 81030 ZBP1         | ENST00000480037 | 0,917095491 | 7,803161688 | 0,009962254 |
| A_24_P48539    | 8778 SIGLEC5       | ENST00000570106 | 0,917033826 | 9,19060454  | 0,002059045 |
| A_23_P28334    | 8807 IL18RAP       | ENST00000264260 | 0,915827429 | 11,81630088 | 0,020368484 |
| A_23_P40611    | 6948 TCN2          | ENST00000471659 | 0,912540958 | 6,970065643 | 0,005735204 |
| A_23_P202978   | 834 CASP1          | ENST00000534497 | 0,910761858 | 11,34031736 | 0,000472212 |
| A_24_P382319   | 634 CEACAM1        | ENST00000403444 | 0,910674477 | 10,26174308 | 0,01599546  |
| A_33_P3362915  | 2993 GYP A         | ENST00000513677 | 0,910182953 | 8,130839093 | 0,076968581 |
| A_23_P80032    | 1869 E2F1          | ENST00000343380 | 0,909827345 | 6,94775734  | 1,74E-05    |
| A_33_P3296303  | 51510 CHMP5        | ENST00000487080 | 0,907241709 | 8,972480854 | 0,000390951 |
| A_23_P80032    | 1869 E2F1          | ENST00000343380 | 0,906884036 | 6,847107304 | 8,01E-06    |
| A_24_P82880    | 7171 TPM4          | ENST00000586193 | 0,906778589 | 10,04701886 | 7,99E-06    |
| A_23_P81212    | 51023 MRPS18C      | ENST00000514581 | 0,90433338  | 9,411629638 | 0,000225066 |
| A_23_P124190   | 53840 TRIM34       | ENST00000491385 | 0,903213271 | 8,200674555 | 1,45E-05    |
| A_23_P121253   | 8743 TNFSF10       | ENST00000241261 | 0,903153646 | 12,29400752 | 0,005709227 |
| A_23_P89509    | 10615 SPAG5        | ENST00000580676 | 0,900886157 | 7,692683842 | 0,002416361 |
| A_23_P138507   | 983 CDK1           | ENST00000448257 | 0,898281193 | 6,578050318 | 0,00102887  |
| A_32_P162187   | 717 C2             | ENST00000299367 | 0,897479093 | 7,677231747 | 0,008640015 |
| A_24_P30194    | 24138 IFIT5        | ENST00000371795 | 0,896063874 | 9,850444801 | 0,028897516 |
| A_23_P138507   | 983 CDK1           | ENST00000448257 | 0,895891097 | 6,606963012 | 0,001718903 |

|               |                  |                 |             |             |             |
|---------------|------------------|-----------------|-------------|-------------|-------------|
| A_21_P0011496 | 1066 CES1        | ENST00000566467 | 0,89225468  | 8,019993546 | 0,046256301 |
| A_23_P427760  | 143689 PIWIL4    | ENST00000446230 | 0,891889581 | 7,713649274 | 0,0026746   |
| A_21_P0000015 | 83666 PARP9      | NA              | 0,890153862 | 9,91664535  | 0,018954491 |
| A_23_P359540  | 8361 HIST1H4F    | ENST00000244537 | 0,889828599 | 8,215583157 | 8,10E-06    |
| A_23_P138507  | 983 CDK1         | ENST00000448257 | 0,889657541 | 6,563528034 | 0,001016607 |
| A_23_P68610   | 22974 TPX2       | ENST00000340513 | 0,888723099 | 6,790073808 | 0,000345812 |
| A_23_P111041  | 8346 HIST1H2BI   | ENST00000377733 | 0,88870978  | 10,67761233 | 6,19E-05    |
| A_23_P41470   | 55601 DDX60      | ENST00000393743 | 0,888543997 | 8,257613578 | 0,027849845 |
| A_23_P10385   | 51514 DTL        | ENST00000475419 | 0,887854709 | 6,596221468 | 0,000404875 |
| A_24_P941912  | 151636 DTX3L     | ENST00000296161 | 0,887335605 | 9,501131899 | 0,008364032 |
| A_23_P252322  | 514 ATP5E        | ENST00000395659 | 0,885035168 | 14,9692158  | 2,41E-05    |
| A_23_P254852  | 9381 OTOF        | ENST00000272371 | 0,884275636 | 11,15143817 | 0,011027299 |
| A_23_P80032   | 1869 E2F1        | ENST00000343380 | 0,884274482 | 6,898688012 | 2,69E-05    |
| A_23_P62890   | 2633 GBP1        | ENST00000370473 | 0,884248632 | 8,723410968 | 0,04958668  |
| A_24_P161018  | 54625 PARP14     | ENST00000475640 | 0,88336484  | 10,94855057 | 0,012407515 |
| A_24_P302998  | 521 ATP5I        | ENST00000515202 | 0,882525943 | 10,95753951 | 0,000546257 |
| A_33_P3220663 | 246329 STAC3     | ENST00000557176 | 0,882117212 | 9,302181343 | 0,000711739 |
| A_23_P117582  | 122953 JDP2      | ENST00000267569 | 0,88201781  | 10,91012401 | 0,000240236 |
| A_23_P10385   | 51514 DTL        | ENST00000475419 | 0,881420301 | 6,658483214 | 0,000674994 |
| A_33_P3252394 | 10912 GADD45G    | ENST00000252506 | 0,880620501 | 8,251307503 | 8,09E-05    |
| A_24_P169148  | 3146 HMGB1       | ENST00000522557 | 0,879677362 | 10,7601279  | 0,000298008 |
| A_23_P121602  | 8819 SAP30       | ENST00000296504 | 0,878487879 | 8,744195893 | 0,005481268 |
| A_23_P86653   | 5552 SRGN        | ENST00000462445 | 0,877293004 | 13,97589165 | 0,002036829 |
| A_21_P0002006 | 104326052 NRIR   | NA              | 0,877186296 | 7,164374582 | 0,00328737  |
| A_23_P121602  | 8819 SAP30       | ENST00000296504 | 0,874623837 | 8,81172919  | 0,006149436 |
| A_33_P3246833 | 3557 IL1RN       | ENST00000259206 | 0,87218573  | 13,55820628 | 0,021400171 |
| A_23_P370989  | 4173 MCM4        | ENST00000518382 | 0,870416151 | 7,096338877 | 0,000979782 |
| A_33_P3374210 | 4288 MKI67       | ENST00000617118 | 0,869090756 | 7,40363139  | 0,000157236 |
| A_21_P0000671 | 4493 MT1E        | ENST00000563395 | 0,86855366  | 9,035608605 | 4,06E-05    |
| A_23_P145874  | 219285 SAMD9L    | ENST00000411955 | 0,868325098 | 11,21876359 | 0,031037305 |
| A_23_P201711  | 6277 S100A6      | ENST00000462776 | 0,866860312 | 14,83095254 | 4,45E-05    |
| A_33_P3417695 | 440836 ODF3B     | ENST00000329363 | 0,863216944 | 10,97228078 | 0,002219444 |
| A_23_P80032   | 1869 E2F1        | ENST00000343380 | 0,862880028 | 6,920814462 | 5,93E-05    |
| A_23_P117582  | 122953 JDP2      | ENST00000267569 | 0,862331028 | 10,95052184 | 0,000389706 |
| A_23_P137016  | 6303 SAT1        | ENST00000474223 | 0,861727922 | 13,25185603 | 0,000631527 |
| A_33_P3397443 | 9088 PKMYT1      | ENST00000574680 | 0,86037007  | 9,574541676 | 0,001268083 |
| A_23_P121602  | 8819 SAP30       | ENST00000296504 | 0,859083781 | 8,814903549 | 0,006710852 |
| A_23_P213718  | 27089 UQCRQ      | ENST00000378665 | 0,858117546 | 11,86860488 | 0,004752607 |
| A_23_P121602  | 8819 SAP30       | ENST00000296504 | 0,856133283 | 8,79124743  | 0,007736235 |
| A_23_P39840   | 10791 VAMP5      | ENST00000306384 | 0,855722195 | 9,868286975 | 0,001895923 |
| A_33_P3372910 | 23586 DDX58      | NA              | 0,855452231 | 9,760557886 | 0,037509646 |
| A_23_P51085   | 57405 SPC25      | ENST00000611144 | 0,854824204 | 6,493503462 | 0,000690539 |
| A_33_P3267799 | 11006 LILRB4     | ENST00000617098 | 0,85435814  | 9,409905353 | 0,012040427 |
| A_21_P0000508 | 100170227 SNAR-D | NA              | 0,853256511 | 8,19451501  | 0,053470535 |
| A_33_P3290909 | 8243 SMC1A       | ENST00000375340 | 0,851281242 | 9,195942931 | 9,06E-06    |
| A_23_P138507  | 983 CDK1         | ENST00000448257 | 0,850074042 | 6,547153643 | 0,001440755 |
| A_23_P52017   | 259266 ASPM      | ENST00000367408 | 0,849610525 | 6,772929569 | 0,005606171 |
| A_23_P121602  | 8819 SAP30       | ENST00000296504 | 0,849452159 | 8,733324895 | 0,007480662 |
| A_23_P98382   | 26521 TIMM8B     | ENST00000507614 | 0,848758057 | 10,37346682 | 0,005980818 |
| A_24_P3783    | 8342 HIST1H2BM   | ENST00000621112 | 0,848010661 | 10,64959098 | 8,33E-05    |
| A_23_P121602  | 8819 SAP30       | ENST00000296504 | 0,846932135 | 8,990494228 | 0,008387318 |
| A_23_P208880  | 29128 UHRF1      | ENST00000624301 | 0,846794964 | 6,767599469 | 0,002577057 |
| A_23_P130194  | 5831 PYCR1       | ENST00000619204 | 0,845909954 | 7,470786941 | 0,003650378 |

|               |                    |                 |             |             |             |
|---------------|--------------------|-----------------|-------------|-------------|-------------|
| A_23_P81690   | 1347 COX7A2        | ENST00000459637 | 0,844879074 | 12,45162328 | 0,000240995 |
| A_23_P8913    | 760 CA2            | ENST00000285379 | 0,84388709  | 9,856361095 | 0,026868037 |
| A_23_P10385   | 51514 DTL          | ENST00000475419 | 0,841315701 | 6,58557745  | 0,000620991 |
| A_23_P117582  | 122953 JDP2        | ENST00000267569 | 0,840686587 | 11,0278338  | 0,000380289 |
| A_23_P145965  | 8460 TPST1         | ENST00000304842 | 0,838302512 | 8,02112167  | 0,067899224 |
| A_23_P10385   | 51514 DTL          | ENST00000475419 | 0,837203082 | 6,541501492 | 0,000547453 |
| A_33_P3402526 | 55454 CSGALNACT2   | ENST00000538229 | 0,837020687 | 9,196745384 | 4,55E-05    |
| A_23_P5392    | 9540 TP53I3        | ENST00000238721 | 0,83590719  | 8,212946275 | 0,001478818 |
| A_23_P170186  | 26873 OPLAH        | ENST00000618853 | 0,835273434 | 8,769914397 | 0,004143182 |
| A_24_P33982   | 284021 MILR1       | ENST00000612535 | 0,833741933 | 8,549559186 | 0,000788082 |
| A_33_P3269678 | 541471 MIR4435-1HG | ENST00000409054 | 0,833275667 | 10,25558506 | 8,75E-05    |
| A_24_P274270  | 6772 STAT1         | ENST00000452281 | 0,831718839 | 11,07695317 | 0,023027511 |
| A_23_P59069   | 8348 HIST1H2BO     | NA              | 0,830914324 | 10,91734339 | 4,35E-05    |
| A_23_P122233  | 29093 MRPL22       | ENST00000519059 | 0,830877036 | 8,59333517  | 0,000298008 |
| A_23_P121602  | 8819 SAP30         | ENST00000296504 | 0,830713259 | 8,75363692  | 0,00903055  |
| A_23_P206059  | 9055 PRC1          | ENST00000361188 | 0,829836774 | 7,573307302 | 0,004799689 |
| A_23_P48669   | 1033 CDKN3         | ENST00000555837 | 0,829572567 | 6,656275071 | 0,001234902 |
| A_32_P199301  | 7027 TFDP1         | ENST00000544902 | 0,829110992 | 8,107295384 | 0,004596697 |
| A_23_P10385   | 51514 DTL          | ENST00000475419 | 0,829108594 | 6,533004605 | 0,000638107 |
| A_23_P138507  | 983 CDK1           | ENST00000448257 | 0,828841756 | 6,490540686 | 0,001264872 |
| A_23_P59547   | 51251 NT5C3A       | ENST00000242210 | 0,828647717 | 10,77778451 | 0,001424593 |
| A_23_P395374  | 8360 HIST1H4D      | NA              | 0,828346883 | 9,65912309  | 0,006776524 |
| A_32_P205553  | 51121 RPL26L1      | ENST00000602923 | 0,827214127 | 8,669692998 | 0,000666963 |
| A_23_P258493  | 4001 LMNB1         | ENST00000460265 | 0,826353464 | 8,723405029 | 0,001304445 |
| A_23_P111701  | 2791 GNG11         | ENST00000248564 | 0,825467248 | 10,19787063 | 0,036400735 |
| A_23_P80032   | 1869 E2F1          | ENST00000343380 | 0,825385736 | 6,861591591 | 3,32E-05    |
| A_23_P159833  | 4694 NDUFA1        | ENST00000371437 | 0,825129263 | 11,37560591 | 0,00048109  |
| A_23_P117582  | 122953 JDP2        | ENST00000267569 | 0,824944456 | 11,15516881 | 0,000531613 |
| A_23_P117582  | 122953 JDP2        | ENST00000267569 | 0,824333112 | 10,93132273 | 0,000458415 |
| A_33_P3221960 | 8807 IL18RAP       | ENST00000264260 | 0,823650402 | 11,43111971 | 0,022655239 |
| A_24_P941167  | 80830 APOL6        | ENST00000409652 | 0,822521247 | 11,02646958 | 0,024356954 |
| A_23_P126803  | 10092 ARPC5        | ENST00000294742 | 0,822257668 | 14,01377454 | 3,53E-05    |
| A_24_P295245  | 444 ASPH           | ENST00000517928 | 0,821939661 | 8,574343663 | 0,011946181 |
| A_23_P121602  | 8819 SAP30         | ENST00000296504 | 0,821422328 | 8,827883506 | 0,011988037 |
| A_23_P208866  | 9535 GMFG          | ENST00000601731 | 0,820713344 | 14,74689781 | 8,96E-05    |
| A_23_P10385   | 51514 DTL          | ENST00000475419 | 0,820533837 | 6,515731587 | 0,000547453 |
| A_23_P143190  | 4605 MYBL2         | ENST00000396863 | 0,818517274 | 7,143413914 | 0,000398703 |
| A_23_P85903   | 7100 TLR5          | ENST00000366881 | 0,816988627 | 8,975363915 | 0,013291139 |
| A_23_P70007   | 3161 HMMR          | ENST00000358715 | 0,815181791 | 6,623157732 | 0,002090163 |
| A_23_P10385   | 51514 DTL          | ENST00000475419 | 0,814978795 | 6,572990252 | 0,000722947 |
| A_23_P122233  | 29093 MRPL22       | ENST00000519059 | 0,814937226 | 8,412096839 | 0,000144162 |
| A_23_P154832  | 522 ATP5J          | ENST00000400093 | 0,814704371 | 10,64881223 | 0,000766652 |
| A_23_P161190  | 7431 VIM           | ENST00000544301 | 0,814695838 | 15,17845738 | 9,46E-05    |
| A_32_P35512   | 6741 SSB           | ENST00000420252 | 0,813448486 | 9,426315699 | 3,32E-05    |
| A_23_P19712   | 51053 GMNN         | ENST00000620958 | 0,812903907 | 7,782614053 | 0,003868776 |
| A_33_P3264846 | 219285 SAMD9L      | ENST00000610760 | 0,812122478 | 9,411222059 | 0,028289518 |
| A_24_P223384  | 8335 HIST1H2AB     | ENST00000615868 | 0,811781027 | 7,60129077  | 0,000316681 |
| A_23_P138507  | 983 CDK1           | ENST00000448257 | 0,811753566 | 6,539402247 | 0,000758481 |
| A_23_P58321   | 890 CCNA2          | ENST00000618014 | 0,811630057 | 6,601773774 | 0,00082067  |
| A_24_P150486  | 9517 SPTLC2        | ENST00000216484 | 0,811544591 | 8,213250419 | 0,001741364 |
| A_23_P121602  | 8819 SAP30         | ENST00000296504 | 0,811501388 | 8,917776391 | 0,009391487 |
| A_23_P111701  | 2791 GNG11         | ENST00000248564 | 0,808963876 | 9,980200502 | 0,040558252 |
| A_23_P117582  | 122953 JDP2        | ENST00000267569 | 0,808406276 | 11,05782151 | 0,000896437 |

|               |                 |                 |             |             |             |
|---------------|-----------------|-----------------|-------------|-------------|-------------|
| A_23_P56559   | 10170 DHRS9     | ENST00000428522 | 0,80819634  | 9,970640588 | 0,021319304 |
| A_33_P3271594 | 57159 TRIM54    | ENST00000380075 | 0,807876868 | 7,688311048 | 0,002937838 |
| A_24_P158946  | 121512 FGD4     | ENST00000395740 | 0,806335943 | 9,66681668  | 6,85E-05    |
| A_23_P363174  | 8332 HIST1H2AL  | NA              | 0,806166808 | 6,773236725 | 0,0004699   |
| A_24_P23245   | 4700 NDUFA6     | ENST00000605927 | 0,801817092 | 9,911365111 | 0,000504365 |
| A_23_P122233  | 29093 MRPL22    | ENST00000519059 | 0,801583729 | 8,800911163 | 0,000445164 |
| A_23_P308722  | 92749 DRC1      | ENST00000288710 | 0,801517551 | 6,940122754 | 0,000704011 |
| A_23_P111701  | 2791 GNG11      | ENST00000248564 | 0,800777211 | 10,08084787 | 0,047917796 |
| A_23_P122233  | 29093 MRPL22    | ENST00000519059 | 0,800511517 | 8,624509858 | 0,000717031 |
| A_33_P3265359 | 55502 HES6      | ENST00000409160 | 0,800511208 | 9,125816538 | 0,011891248 |
| A_33_P3244931 | 1622 DBI        | ENST00000409094 | 0,799593249 | 10,81090311 | 0,002311562 |
| A_33_P3284933 | 246778 IL27     | ENST00000356897 | 0,799191943 | 7,689008822 | 0,008991569 |
| A_23_P138507  | 983 CDK1        | ENST00000448257 | 0,798348726 | 6,518172913 | 0,002143338 |
| A_23_P111701  | 2791 GNG11      | ENST00000248564 | 0,796868031 | 10,09060465 | 0,046647263 |
| A_23_P111701  | 2791 GNG11      | ENST00000248564 | 0,796742081 | 10,12967191 | 0,039604435 |
| A_24_P172481  | 10346 TRIM22    | ENST00000379965 | 0,795992953 | 10,75717784 | 0,018895912 |
| A_23_P351275  | 7378 UPP1       | ENST00000416681 | 0,795270963 | 9,311162396 | 0,000752586 |
| A_24_P226008  | 11343 MGLL      | ENST00000476682 | 0,795077328 | 9,76244747  | 0,0026746   |
| A_23_P10385   | 51514 DTL       | ENST00000475419 | 0,794355595 | 6,612164875 | 0,001008059 |
| A_24_P29001   | 27258 LSM3      | ENST00000306024 | 0,794197253 | 9,21091236  | 0,007061467 |
| A_23_P132956  | 7345 UCHL1      | ENST00000472501 | 0,79326161  | 6,44091581  | 0,022923282 |
| A_23_P111701  | 2791 GNG11      | ENST00000248564 | 0,791949606 | 9,986751154 | 0,038420032 |
| A_23_P212475  | 51246 SHISA5    | ENST00000417962 | 0,791225879 | 15,29920341 | 0,014523565 |
| A_24_P348265  | 2204 FCAR       | ENST00000614052 | 0,790698407 | 8,495774324 | 0,001243103 |
| A_21_P0012993 | 4671 NAIP       | ENST00000447012 | 0,790018106 | 9,676193742 | 0,026199946 |
| A_33_P3400477 | 6491 STIL       | ENST00000418131 | 0,789917876 | 7,150849851 | 0,000107016 |
| A_23_P137470  | 57568 SIPA1L2   | ENST00000308942 | 0,788290561 | 8,466572166 | 0,021196496 |
| A_24_P370172  | 353514 LILRA5   | ENST00000446712 | 0,787586686 | 9,234511145 | 0,004988345 |
| A_23_P10385   | 51514 DTL       | ENST00000475419 | 0,787317236 | 6,558790245 | 0,000767966 |
| A_23_P200001  | 91624 NEXN      | ENST00000480732 | 0,7871919   | 7,671460037 | 0,0071864   |
| A_33_P3225522 | 4939 OAS2       | ENST00000449768 | 0,78690863  | 9,488432072 | 0,070291748 |
| A_33_P3229918 | 171558 PTCRA    | ENST00000616441 | 0,782912399 | 10,55881039 | 0,057864871 |
| A_33_P3393836 | 51251 NT5C3A    | ENST00000409467 | 0,782072986 | 9,298186737 | 0,00195636  |
| A_33_P3363425 | 257019 FRMD3    | ENST00000621208 | 0,780679257 | 7,911537534 | 0,012097184 |
| A_33_P3273436 | 130589 GALM     | ENST00000272252 | 0,780549772 | 8,043888949 | 0,001174098 |
| A_23_P122233  | 29093 MRPL22    | ENST00000519059 | 0,780043047 | 8,479593301 | 0,000460317 |
| A_33_P3395008 | 55289 ACOXL     | ENST00000439055 | 0,778445424 | 6,925574281 | 0,000101233 |
| A_23_P111701  | 2791 GNG11      | ENST00000248564 | 0,778124377 | 10,08612485 | 0,048616098 |
| A_33_P3398448 | 84875 PARP10    | ENST00000526007 | 0,778068942 | 12,02193661 | 0,025356578 |
| A_33_P3854217 | 79932 KIAA0319L | ENST00000325722 | 0,777960326 | 9,218029654 | 0,004043783 |
| A_23_P254733  | 79682 CENPU     | ENST00000502461 | 0,777579874 | 6,876931622 | 0,005327183 |
| A_23_P206396  | 51192 CKLF      | ENST00000527845 | 0,77454339  | 11,36935689 | 0,000814043 |
| A_23_P167997  | 8339 HIST1H2BG  | ENST00000541790 | 0,773218453 | 9,207230108 | 8,92E-05    |
| A_23_P160025  | 3428 IFI16      | ENST00000562225 | 0,772678    | 10,26515684 | 0,009093213 |
| A_33_P3287879 | 8357 HIST1H3H   | ENST00000369163 | 0,77228147  | 10,16559768 | 0,000511984 |
| A_23_P16523   | 9518 GDF15      | ENST00000252809 | 0,772124063 | 7,147096244 | 0,09700003  |
| A_32_P25253   | 81689 ISCA1     | ENST00000426679 | 0,771342152 | 9,314518403 | 0,053671447 |
| A_23_P121602  | 8819 SAP30      | ENST00000296504 | 0,77115313  | 8,833825084 | 0,015175007 |
| A_23_P372834  | 358 AQP1        | ENST00000311813 | 0,770618893 | 8,570907928 | 0,081119828 |
| A_23_P58321   | 890 CCNA2       | ENST00000618014 | 0,767651785 | 6,617844326 | 0,00094064  |
| A_23_P145761  | 10124 ARL4A     | ENST00000404894 | 0,76618592  | 8,141235236 | 0,005631934 |
| A_24_P65373   | 3674 ITGA2B     | ENST00000262407 | 0,765491922 | 8,310648515 | 0,09105853  |
| A_23_P379614  | 11339 OIP5      | ENST00000220514 | 0,764974291 | 6,750225955 | 0,007026131 |



|               |           |           |                 |             |             |             |
|---------------|-----------|-----------|-----------------|-------------|-------------|-------------|
| A_33_P3245824 | 80148     | PQLC1     | ENST00000466449 | 0,764186917 | 11,52126113 | 0,012932163 |
| A_24_P212481  | 79772     | MCTP1     | ENST00000505208 | 0,76287105  | 8,091254411 | 0,000557544 |
| A_24_P235429  | 19        | ABCA1     | ENST00000374736 | 0,762266737 | 8,248423208 | 0,001228104 |
| A_23_P78092   | 2123      | EVI2A     | ENST00000578021 | 0,76159306  | 10,27193685 | 0,019840483 |
| A_23_P122233  | 29093     | MRPL22    | ENST00000519059 | 0,761414608 | 8,596836984 | 0,000909817 |
| A_33_P3268507 | 634       | CEACAM1   | ENST00000403136 | 0,761268839 | 7,271660156 | 0,01008309  |
| A_23_P14174   | 10673     | TNFSF13B  | ENST00000486502 | 0,75825092  | 11,90407519 | 0,035303753 |
| A_23_P117582  | 122953    | JDP2      | ENST00000267569 | 0,757938891 | 11,01187811 | 0,001077456 |
| A_23_P122233  | 29093     | MRPL22    | ENST00000519059 | 0,757870397 | 8,572365268 | 0,000532911 |
| A_33_P3242863 | 56953     | NT5M      | ENST00000616989 | 0,75785478  | 10,67949165 | 0,035782407 |
| A_33_P3371718 | 6303      | SAT1      | ENST00000474223 | 0,75766747  | 12,59958948 | 0,001092547 |
| A_23_P82748   | 56943     | ENY2      | ENST00000517350 | 0,756631771 | 10,0445011  | 0,000555927 |
| A_23_P28886   | 5111      | PCNA      | ENST00000379160 | 0,755922813 | 9,395074971 | 0,00190833  |
| A_23_P111701  | 2791      | GNG11     | ENST00000248564 | 0,755803795 | 10,15113465 | 0,052028471 |
| A_23_P107644  | 6632      | SNRPD1    | ENST00000300413 | 0,755275705 | 9,35383609  | 0,003111545 |
| A_21_P0000507 | 100170217 | SNAR-B2   | NA              | 0,753949073 | 8,67602749  | 0,064997873 |
| A_24_P141214  | 2040      | STOM      | ENST00000286713 | 0,753145781 | 10,85526259 | 0,038160651 |
| A_33_P3406072 | 257019    | FRMD3     | ENST00000304195 | 0,753061873 | 6,960599167 | 0,000445231 |
| A_23_P408094  | 4084      | MXD1      | ENST00000410000 | 0,753010421 | 11,97797938 | 0,006424251 |
| A_23_P111054  | 3018      | HIST1H2BB | ENST00000615966 | 0,752631477 | 9,478094065 | 0,000198132 |
| A_23_P30813   | 8362      | HIST1H4K  | NA              | 0,751951376 | 9,225839487 | 0,000753296 |
| A_24_P16124   | 340198    | IFITM4P   | ENST00000414714 | 0,751878649 | 15,19124479 | 0,029086283 |
| A_23_P111701  | 2791      | GNG11     | ENST00000248564 | 0,751742646 | 10,0872036  | 0,055783019 |
| A_23_P259506  | 84418     | CYSTM1    | ENST00000261811 | 0,751180528 | 11,61308531 | 0,02521049  |
| A_23_P29005   | 64092     | SAMSN1    | ENST00000619120 | 0,750659044 | 8,822612267 | 0,00410102  |
| A_24_P283288  | 1432      | MAPK14    | ENST00000474429 | 0,750484254 | 9,200410031 | 0,002409572 |
| A_33_P3383029 | 4601      | MXI1      | ENST00000369612 | 0,75041734  | 11,58510464 | 0,080866089 |
| A_23_P19482   | 23564     | DDAH2     | ENST00000375789 | 0,749750873 | 9,375926583 | 0,000398703 |
| A_23_P67971   | 130589    | GALM      | ENST00000272252 | 0,749726608 | 8,867383578 | 0,003093374 |
| A_23_P131024  | 27033     | ZBTB32    | ENST00000392197 | 0,748736976 | 7,441501845 | 0,011896211 |
| A_23_P58321   | 890       | CCNA2     | ENST00000618014 | 0,748166209 | 6,515543865 | 0,000555927 |
| A_23_P18579   | 10744     | PTTG2     | ENST00000504686 | 0,747923234 | 8,336105277 | 0,000316806 |
| A_24_P927716  | 643036    | SLED1     | ENST00000506741 | 0,747182502 | 8,62353626  | 0,020213326 |
| A_23_P117582  | 122953    | JDP2      | ENST00000267569 | 0,747123304 | 10,9843242  | 0,001298578 |
| A_23_P165402  | 51639     | SF3B6     | ENST00000233468 | 0,745389051 | 9,430790727 | 0,001138991 |
| A_24_P342096  | 100132948 | FAM27C    | ENST00000377542 | 0,742770317 | 7,953778435 | 0,002537392 |
| A_33_P3370094 | 4311      | MME       | ENST00000360490 | 0,742086224 | 10,06878629 | 0,018478969 |
| A_33_P3362641 | 493856    | CISD2     | ENST00000273986 | 0,741688042 | 8,109498844 | 0,031226607 |
| A_21_P0010727 | 2209      | FCGR1A    | ENST00000489479 | 0,738677048 | 8,120293211 | 0,060101672 |
| A_23_P138507  | 983       | CDK1      | ENST00000448257 | 0,738363669 | 6,509064248 | 0,003995721 |
| A_23_P124164  | 57461     | ISY1      | ENST00000485703 | 0,738052008 | 8,127342802 | 7,21E-07    |
| A_23_P133691  | 58528     | RRAGD     | ENST00000369415 | 0,736548561 | 7,930253232 | 0,000909817 |
| A_23_P138507  | 983       | CDK1      | ENST00000448257 | 0,735977097 | 6,491319236 | 0,00335106  |
| A_24_P183128  | 51316     | PLAC8     | ENST00000505406 | 0,735238026 | 12,04035582 | 0,033679581 |
| A_33_P3256347 | 26521     | TIMM8B    | ENST00000541231 | 0,734652275 | 9,835089899 | 0,008729681 |
| A_23_P122233  | 29093     | MRPL22    | ENST00000519059 | 0,734536554 | 8,432849885 | 0,000883171 |
| A_33_P3258612 | 5111      | PCNA      | ENST00000379160 | 0,734481472 | 8,640182322 | 0,00248955  |
| A_33_P3242543 | 4128      | MAOA      | ENST00000338702 | 0,733911403 | 6,675558763 | 0,086223798 |
| A_23_P97064   | 26270     | FBXO6     | ENST00000449067 | 0,733600375 | 8,21679174  | 0,012424972 |
| A_24_P56130   | 4637      | MYL6      | ENST00000550639 | 0,733521847 | 13,46645447 | 0,003415439 |
| A_33_P3407880 | 118932    | ANKRD22   | NA              | 0,732085148 | 6,736743561 | 0,005219389 |
| A_23_P6535    | 113730    | KLHDC7B   | ENST00000395676 | 0,731053914 | 8,709552804 | 0,017480519 |
| A_23_P126278  | 1118      | CHIT1     | ENST00000484834 | 0,729660977 | 6,632182156 | 0,043989585 |

|                |           |           |                 |             |             |             |
|----------------|-----------|-----------|-----------------|-------------|-------------|-------------|
| A_23_P115482   | 29089     | UBE2T     | ENST00000367274 | 0,729408037 | 7,379667556 | 0,005933718 |
| A_23_P100127   | 57082     | CASC5     | ENST00000527044 | 0,729276914 | 6,727264409 | 0,001469869 |
| A_33_P3302632  | 8344      | HIST1H2BE | NA              | 0,728669291 | 7,249291213 | 0,00089436  |
| A_23_P117582   | 122953    | JDP2      | ENST00000267569 | 0,728133887 | 11,23461334 | 0,001633635 |
| A_32_P1173     | 115004    | MB21D1    | ENST00000370318 | 0,728016948 | 9,054888346 | 3,94E-05    |
| A_23_P111701   | 2791      | GNG11     | ENST00000248564 | 0,727997401 | 10,22766515 | 0,061003559 |
| A_33_P3315779  | 55008     | HERC6     | ENST00000273960 | 0,727608006 | 7,449355495 | 0,053030506 |
| A_24_P217834   | 8351      | HIST1H3D  | ENST00000356476 | 0,727120655 | 12,16974498 | 0,001264209 |
| A_23_P118061   | 51192     | CKLF      | ENST00000526149 | 0,726941553 | 11,30480017 | 0,001370419 |
| A_33_P3404588  | 121512    | FGD4      | ENST00000395740 | 0,726246355 | 8,402391742 | 0,000516619 |
| A_23_P145238   | 85236     | HIST1H2BK | NA              | 0,725955755 | 11,7397874  | 0,003988467 |
| A_33_P3268555  | 11262     | SP140     | ENST00000544128 | 0,725573429 | 8,386086349 | 0,006763573 |
| A_23_P57588    | 51512     | GTSE1     | ENST00000491863 | 0,724963564 | 6,574167051 | 0,000341054 |
| A_33_P3228612  | 777       | CACNA1E   | ENST00000367570 | 0,72398908  | 7,043526075 | 0,01609604  |
| A_32_P204676   | 2171      | FABP5     | ENST00000486269 | 0,723716615 | 7,190137068 | 0,000997645 |
| A_23_P381261   | 196883    | ADCY4     | ENST00000554781 | 0,722818427 | 8,716306249 | 0,000340883 |
| A_23_P69908    | 2745      | GLRX      | ENST00000507412 | 0,722565452 | 11,88095155 | 0,001516637 |
| A_33_P3404601  | 717       | C2        | ENST00000460487 | 0,722416223 | 6,584125616 | 0,013922413 |
| A_23_P366216   | 8345      | HIST1H2BH | NA              | 0,722275777 | 11,2707042  | 0,0003415   |
| A_23_P121064   | 5806      | PTX3      | ENST00000295927 | 0,721118177 | 7,115870366 | 0,061929152 |
| A_33_P3231472  | 27348     | TOR1B     | ENST00000486372 | 0,719176353 | 8,804149649 | 0,01453554  |
| A_33_P3396370  | 84519     | ACRBP     | ENST00000229243 | 0,718865193 | 11,46210389 | 0,042500205 |
| A_33_P3879161  | 118788    | PIK3AP1   | ENST00000371109 | 0,718387907 | 8,365179333 | 0,002887609 |
| A_23_P154235   | 9111      | NMI       | ENST00000243346 | 0,718276185 | 10,27182867 | 0,002420242 |
| A_33_P3310780  | 2017      | CTTN      | ENST00000301843 | 0,718168781 | 8,818581533 | 0,089500981 |
| A_33_P3323939  | 643418    | LIPN      | ENST00000404459 | 0,717575096 | 8,058491705 | 0,002416361 |
| A_23_P356526   | 85363     | TRIM5     | ENST00000465634 | 0,717528765 | 7,076018312 | 0,002199293 |
| A_23_P353035   | 3490      | IGFBP7    | ENST00000295666 | 0,716016554 | 9,974491691 | 0,003121513 |
| A_23_P54477    | 55505     | NOP10     | ENST00000328848 | 0,715160363 | 12,98375606 | 2,41E-05    |
| A_33_P3374205  | 4288      | MKI67     | ENST00000617118 | 0,715091607 | 6,835921601 | 0,00094064  |
| A_23_P30799    | 8968      | HIST1H3F  | ENST00000618052 | 0,714788055 | 10,76520403 | 0,001218243 |
| A_23_P14734    | 51065     | RPS27L    | ENST00000482846 | 0,714716833 | 9,643117033 | 0,022137437 |
| A_24_P235266   | 2887      | GRB10     | ENST00000403097 | 0,714486435 | 7,740045747 | 0,040548678 |
| A_23_P87545    | 10410     | IFITM3    | ENST00000531688 | 0,714447071 | 16,30996576 | 0,026199946 |
| A_23_P122233   | 29093     | MRPL22    | ENST00000519059 | 0,713383454 | 8,426342174 | 0,000789695 |
| A_24_P146211   | 3017      | HIST1H2BD | ENST00000377777 | 0,712423718 | 10,120699   | 0,000206684 |
| A_33_P3213772  | 23380     | SRGAP2    | ENST00000604247 | 0,711891027 | 10,65103732 | 0,015009567 |
| A_23_P154235   | 9111      | NMI       | ENST00000243346 | 0,711704226 | 10,17099994 | 0,002371335 |
| A_24_P380536   | 8763      | CD164     | ENST00000506649 | 0,711509345 | 10,81143962 | 9,72E-05    |
| A_23_P154235   | 9111      | NMI       | ENST00000243346 | 0,711014285 | 10,2477075  | 0,001847953 |
| A_23_P46369    | 5872      | RAB13     | ENST00000484297 | 0,710005512 | 6,732737546 | 0,005153275 |
| A_22_P00024462 | 101929693 | RARA-AS1  | NA              | 0,709178332 | 7,560943777 | 0,000487471 |
| A_24_P673063   | 2171      | FABP5     | ENST00000437960 | 0,708764773 | 7,007467168 | 0,000685132 |
| A_23_P7827     | 441168    | FAM26F    | ENST00000368605 | 0,708430476 | 9,839367621 | 0,089049363 |
| A_24_P68631    | 317772    | HIST2H2AB | ENST00000331128 | 0,707872989 | 12,75073747 | 0,001412029 |
| A_23_P154235   | 9111      | NMI       | ENST00000243346 | 0,707637929 | 10,41078803 | 0,002794139 |
| A_23_P207445   | 5608      | MAP2K6    | ENST00000592348 | 0,707588414 | 8,712609432 | 0,000269187 |
| A_23_P200507   | 29097     | CNIH4     | ENST00000366860 | 0,707263727 | 10,3210117  | 0,00075452  |
| A_23_P151150   | 2305      | FOXO1     | ENST00000359843 | 0,707247465 | 6,49986303  | 0,000532911 |
| A_24_P270144   | 967       | CD63      | ENST00000551173 | 0,706214239 | 13,27995673 | 0,000499737 |
| A_23_P58321    | 890       | CCNA2     | ENST00000618014 | 0,705115235 | 6,537061394 | 0,001249592 |
| A_23_P122233   | 29093     | MRPL22    | ENST00000519059 | 0,704853262 | 8,39884251  | 0,000790579 |
| A_33_P3395605  | 338773    | TMEM119   | ENST00000392806 | 0,704797376 | 6,652563126 | 0,004593684 |

|                |           |             |                 |             |             |             |
|----------------|-----------|-------------|-----------------|-------------|-------------|-------------|
| A_23_P145777   | 4697      | NDUFA4      | ENST00000482299 | 0,704726324 | 11,54432307 | 0,026368115 |
| A_32_P95729    | 55215     | FANCI       | ENST00000566615 | 0,704684925 | 7,584481643 | 0,000774756 |
| A_33_P3372705  | 647135    | SRGAP2B     | ENST00000304465 | 0,702031183 | 10,32508645 | 0,010179035 |
| A_24_P385611   | 6672      | SP100       | ENST00000462751 | 0,699772667 | 10,34165134 | 0,000573872 |
| A_23_P85693    | 2634      | GBP2        | ENST00000463660 | 0,698386508 | 11,31355952 | 0,006217351 |
| A_24_P175187   | 54809     | SAMD9       | ENST00000379958 | 0,698185791 | 7,981173102 | 0,003155336 |
| A_23_P69383    | 83666     | PARP9       | ENST00000489652 | 0,698081844 | 9,430166847 | 0,037754786 |
| A_23_P157795   | 8727      | CTNNAL1     | ENST00000374594 | 0,697551975 | 8,252003924 | 0,079375113 |
| A_23_P121064   | 5806      | PTX3        | ENST00000295927 | 0,697182073 | 7,080477402 | 0,074948325 |
| A_33_P3229032  | 6320      | CLEC11A     | ENST00000250340 | 0,69702027  | 9,237137478 | 0,072936334 |
| A_24_P55148    | 8970      | HIST1H2BJ   | ENST00000339812 | 0,696944063 | 8,769982514 | 0,000125493 |
| A_21_P0000511  | 100170221 | SNAR-H      | NA              | 0,696608402 | 7,723675888 | 0,087622173 |
| A_33_P3389230  | 2833      | CXCR3       | ENST00000373691 | 0,695709639 | 8,338662482 | 0,023142116 |
| A_24_P227091   | 3832      | KIF11       | ENST00000260731 | 0,695475719 | 6,791405034 | 0,006902849 |
| A_32_P199252   | 3320      | HSP90AA1    | ENST00000530115 | 0,694786262 | 9,329264509 | 0,001234902 |
| A_23_P87709    | 79887     | PLBD1       | ENST00000240617 | 0,694347129 | 13,30001417 | 0,019198304 |
| A_23_P157879   | 2219      | FCN1        | ENST00000371806 | 0,69349357  | 15,70811196 | 0,019144647 |
| A_33_P3404989  | 8357      | HIST1H3H    | ENST00000369163 | 0,693221582 | 7,931741183 | 0,007176246 |
| A_23_P256821   | 1378      | CR1         | ENST00000400960 | 0,693028666 | 8,12964035  | 0,014592138 |
| A_23_P128991   | 81892     | SLIRP       | ENST00000556956 | 0,692576952 | 9,293043818 | 0,002474791 |
| A_23_P154235   | 9111      | NMI         | ENST00000243346 | 0,690709341 | 10,34098254 | 0,003121063 |
| A_23_P117582   | 122953    | JDP2        | ENST00000267569 | 0,689172151 | 11,0836069  | 0,002929242 |
| A_23_P214627   | 199       | AIF1        | ENST00000459762 | 0,688765106 | 13,60887512 | 0,003980394 |
| A_33_P3229083  | 85236     | HIST1H2BK   | ENST00000356950 | 0,687437815 | 10,10168504 | 0,000475296 |
| A_23_P338479   | 29126     | CD274       | ENST00000381577 | 0,686528435 | 7,19041321  | 0,034523206 |
| A_33_P3351851  | 8368      | HIST1H4L    | ENST00000618305 | 0,686003789 | 7,030637989 | 0,000383538 |
| A_21_P0006788  | 100505869 | CCDC147-AS1 | NA              | 0,685534446 | 6,930111757 | 0,001400177 |
| A_24_P328504   | 11262     | SP140       | ENST00000476126 | 0,685471625 | 10,52976567 | 0,007950038 |
| A_23_P112260   | 2790      | GNG10       | ENST00000374293 | 0,685305715 | 10,05694195 | 0,065128062 |
| A_23_P128470   | 160364    | CLEC12A     | ENST00000396507 | 0,685298469 | 8,336756528 | 0,08582277  |
| A_23_P98744    | 119774    | OR52K2      | ENST00000325719 | 0,685160248 | 8,14594449  | 0,014069384 |
| A_23_P317056   | 4541      | ND6         | ENST00000361681 | 0,684631791 | 9,404578826 | 0,016192181 |
| A_23_P88740    | 55839     | CENPN       | ENST00000299572 | 0,684510762 | 6,825934237 | 0,001260201 |
| A_23_P94533    | 1514      | CTSL        | ENST00000375894 | 0,684225883 | 8,693333369 | 0,020609476 |
| A_23_P140301   | 5684      | PSMA3       | ENST00000557087 | 0,683173676 | 9,842823067 | 0,000901169 |
| A_23_P15414    | 8578      | SCARF1      | ENST00000576012 | 0,682598541 | 8,976714192 | 0,039832363 |
| A_23_P208009   | 90701     | SEC11C      | ENST00000299714 | 0,682161813 | 10,27900988 | 0,058719599 |
| A_23_P121064   | 5806      | PTX3        | ENST00000295927 | 0,680843015 | 7,155630389 | 0,080986229 |
| A_33_P3246318  | 9978      | RBX1        | ENST00000216225 | 0,679411437 | 11,41368442 | 0,007164302 |
| A_23_P149200   | 991       | CDC20       | ENST00000372462 | 0,678673391 | 7,326874833 | 0,002123155 |
| A_23_P99253    | 8825      | LIN7A       | ENST00000261203 | 0,677858837 | 8,516698763 | 0,009332778 |
| A_33_P3246829  | 3557      | IL1RN       | ENST00000409930 | 0,677116037 | 8,043330713 | 0,016222086 |
| A_23_P206733   | 1066      | CES1        | ENST00000569260 | 0,676920315 | 8,333744687 | 0,011946581 |
| A_33_P3354564  | 2820      | GPD2        | ENST00000409861 | 0,676899382 | 7,535222361 | 3,32E-05    |
| A_23_P406025   | 158471    | PRUNE2      | ENST00000223609 | 0,675769922 | 6,704053819 | 0,005188418 |
| A_23_P32707    | 9700      | ESPL1       | ENST00000552462 | 0,675027612 | 7,128267822 | 0,000307507 |
| A_23_P70398    | 7422      | VEGFA       | ENST00000518538 | 0,674475947 | 7,38832113  | 0,000332113 |
| A_33_P3313596  | 728642    | CDK11A      | ENST00000401096 | 0,67356106  | 9,095634813 | 5,72E-06    |
| A_22_P00009106 | 100874375 | FAM155A-IT1 | NA              | 0,673063215 | 9,285476902 | 0,038299617 |
| A_33_P3363560  | 55092     | TMEM51      | ENST00000376014 | 0,672486075 | 7,501039504 | 0,052619317 |
| A_21_P0012944  | 11039     | SMA4        | NA              | 0,672284598 | 10,94265901 | 0,053293005 |
| A_33_P3293768  | 386674    | KRTAP10-6   | ENST00000400368 | 0,671928215 | 7,143575925 | 0,099278936 |
| A_33_P3361412  | 55356     | SLC22A15    | ENST00000369502 | 0,671529006 | 7,295970788 | 0,058053256 |

|               |                  |                 |             |             |             |
|---------------|------------------|-----------------|-------------|-------------|-------------|
| A_24_P239731  | 9334 B4GALT5     | ENST00000371711 | 0,670944771 | 10,73411954 | 0,005232703 |
| A_23_P127663  | 79056 PRRG4      | ENST00000257836 | 0,670460242 | 7,955002811 | 0,004755362 |
| A_24_P314571  | 147841 SPC24     | ENST00000592540 | 0,670332342 | 6,592305725 | 0,00335106  |
| A_23_P94230   | 23643 LY96       | ENST00000284818 | 0,66924033  | 9,582593336 | 0,046493025 |
| A_23_P58321   | 890 CCNA2        | ENST00000618014 | 0,669070411 | 6,481566111 | 0,001284241 |
| A_23_P58321   | 890 CCNA2        | ENST00000618014 | 0,669028851 | 6,503867757 | 0,002285856 |
| A_23_P250358  | 55008 HERC6      | ENST00000273960 | 0,6682485   | 6,837752669 | 0,014142729 |
| A_23_P37441   | 567 B2M          | ENST00000557901 | 0,667489564 | 15,86293617 | 0,00335106  |
| A_23_P37441   | 567 B2M          | ENST00000557901 | 0,66710378  | 16,13322573 | 0,002713719 |
| A_23_P433152  | 132321 C4orf33   | ENST00000425929 | 0,666572603 | 8,278252624 | 0,000208971 |
| A_23_P88331   | 9787 DLGAP5      | ENST00000247191 | 0,666371473 | 6,473014412 | 0,004271344 |
| A_24_P88763   | 84695 LOXL3      | ENST00000264094 | 0,665905819 | 8,709879132 | 0,000846472 |
| A_23_P154235  | 9111 NMI         | ENST00000243346 | 0,665771164 | 10,64229927 | 0,002542983 |
| A_23_P16944   | 6382 SDC1        | ENST00000381150 | 0,665296293 | 7,619668076 | 0,007242042 |
| A_33_P3307163 | 282996 RBM20     | ENST00000369519 | 0,664981238 | 8,393011541 | 0,023208725 |
| A_23_P259189  | 25932 CLIC4      | ENST00000488683 | 0,66386162  | 7,895385008 | 0,001280879 |
| A_24_P388810  | 6728 SRP19       | ENST00000520401 | 0,662503498 | 8,475055735 | 3,56E-05    |
| A_33_P3349536 | 1111 CHEK1       | ENST00000528276 | 0,661945752 | 6,536687428 | 0,000902059 |
| A_23_P58321   | 890 CCNA2        | ENST00000618014 | 0,661744108 | 6,491563517 | 0,001589633 |
| A_23_P126241  | 8672 EIF4G3      | ENST00000602326 | 0,661484333 | 8,928526907 | 0,000126395 |
| A_23_P154235  | 9111 NMI         | ENST00000243346 | 0,660017454 | 10,26879148 | 0,004376569 |
| A_33_P3317523 | 3925 STMN1       | ENST00000374291 | 0,66000206  | 10,49926137 | 0,078595029 |
| A_23_P58321   | 890 CCNA2        | ENST00000618014 | 0,658738356 | 6,433101629 | 0,001509152 |
| A_33_P3278068 | 1997 ELF1        | ENST00000239882 | 0,658476537 | 10,78389326 | 9,81E-05    |
| A_33_P3220911 | 684 BST2         | ENST00000252593 | 0,657991348 | 12,07555836 | 0,049029248 |
| A_33_P3278941 | 9985 REC8        | ENST00000559939 | 0,656657011 | 10,65477834 | 0,000744195 |
| A_23_P79094   | 11026 LILRA3     | ENST00000612127 | 0,655282762 | 10,2275362  | 0,049081399 |
| A_23_P108751  | 2274 FHL2        | ENST00000358129 | 0,654026913 | 8,357847483 | 0,072089338 |
| A_23_P143958  | 200916 RPL22L1   | ENST00000494771 | 0,653810107 | 9,69381504  | 0,084928497 |
| A_23_P93180   | 8347 HIST1H2BC   | ENST00000396984 | 0,653269512 | 9,408213881 | 0,000726332 |
| A_23_P127385  | 4607 MYBPC3      | ENST00000256993 | 0,653013637 | 9,147944751 | 0,013636226 |
| A_33_P3252196 | 2146 EZH2        | ENST00000320356 | 0,652805383 | 7,839255648 | 0,002438327 |
| A_33_P3281816 | 10487 CAP1       | ENST00000449311 | 0,651401455 | 9,571772041 | 3,53E-05    |
| A_24_P55225   | 221421 RSPH9     | ENST00000372163 | 0,650491945 | 6,881954675 | 0,000531279 |
| A_33_P3322999 | 414152 C10orf105 | ENST00000398786 | 0,650458144 | 8,728502367 | 0,07270601  |
| A_33_P3236071 | 51266 CLEC1B     | ENST00000348658 | 0,650058561 | 7,52619897  | 0,031226607 |
| A_23_P121064  | 5806 PTX3        | ENST00000295927 | 0,649730436 | 6,962743306 | 0,078915791 |
| A_32_P96719   | 79801 SHCBP1     | ENST00000303383 | 0,648852582 | 6,363904176 | 0,002584977 |
| A_24_P383523  | 23034 SAMD4A     | ENST00000554335 | 0,648315005 | 7,629139679 | 0,089177163 |
| A_33_P3236065 | 51266 CLEC1B     | ENST00000348658 | 0,648274598 | 7,950280344 | 0,053030506 |
| A_23_P39465   | 684 BST2         | ENST00000533098 | 0,64790865  | 11,32745365 | 0,051853586 |
| A_23_P94703   | 27348 TOR1B      | ENST00000259339 | 0,647137046 | 8,410024484 | 0,023820806 |
| A_33_P3224710 | 22797 TFEC       | ENST00000393485 | 0,646696859 | 8,407964896 | 0,033359358 |
| A_23_P79572   | 85009 MGC16025   | NA              | 0,646506266 | 7,294016289 | 0,000398703 |
| A_33_P3400374 | 85441 HELZ2      | ENST00000427522 | 0,645799859 | 12,12357791 | 0,085531565 |
| A_32_P210202  | 144455 E2F7      | ENST00000416496 | 0,645397034 | 6,476000903 | 0,001960219 |
| A_23_P120566  | 6238 RRBP1       | ENST00000246043 | 0,643134519 | 8,155642336 | 0,000316681 |
| A_33_P3369760 | 152007 GLIPR2    | ENST00000377959 | 0,643079992 | 10,8098122  | 0,000247293 |
| A_23_P375     | 55143 CDCA8      | ENST00000327331 | 0,642678204 | 7,694861779 | 0,015663926 |
| A_23_P213584  | 3101 HK3         | ENST00000292432 | 0,642576686 | 9,476323056 | 0,019452269 |
| A_33_P3290573 | 55603 FAM46A     | ENST00000369754 | 0,642474286 | 8,94614138  | 0,013627784 |
| A_33_P3318796 | 10272 FSTL3      | ENST00000166139 | 0,641154172 | 7,14032497  | 0,043452903 |
| A_23_P216094  | 444 ASPH         | ENST00000541428 | 0,640183165 | 7,65672882  | 0,02609726  |

|                |                 |                 |             |             |             |
|----------------|-----------------|-----------------|-------------|-------------|-------------|
| A_32_P171328   | 27338 UBE2S     | ENST00000264552 | 0,63987823  | 9,943073109 | 0,0003415   |
| A_33_P3219279  | 84502 JPH4      | ENST00000397118 | 0,639808721 | 7,0524208   | 0,001993426 |
| A_23_P37441    | 567 B2M         | ENST00000557901 | 0,63973172  | 16,04465288 | 0,003024787 |
| A_23_P371039   | 4923 NTSR1      | ENST00000370501 | 0,6388653   | 6,66187052  | 0,015611554 |
| A_33_P3235987  | 5303 PIN4       | ENST00000451079 | 0,638497685 | 8,135537908 | 0,000628014 |
| A_19_P00804072 | 57674 RNF213    | ENST00000559070 | 0,6366818   | 9,247937092 | 0,073280253 |
| A_23_P37441    | 567 B2M         | ENST00000557901 | 0,63664866  | 15,87787881 | 0,003552827 |
| A_33_P3379669  | 727800 RNF208   | ENST00000392827 | 0,636484084 | 7,36351682  | 0,008017302 |
| A_33_P3282973  | 79870 BAALC     | ENST00000297574 | 0,636230916 | 7,794789982 | 0,020444215 |
| A_23_P128084   | 3679 ITGA7      | ENST00000452168 | 0,63622556  | 8,651267559 | 0,040558252 |
| A_19_P00809119 | 401237 CASC15   | ENST00000444265 | 0,635958045 | 8,296341656 | 0,073280253 |
| A_23_P65157    | 10063 COX17     | ENST00000468918 | 0,635049412 | 9,767629114 | 0,000875553 |
| A_32_P155247   | 2512 FTL        | ENST00000427242 | 0,634086103 | 14,46214828 | 0,000266616 |
| A_32_P91250    | 7332 UBE2L3     | ENST00000496722 | 0,633922333 | 9,718147165 | 1,55E-05    |
| A_33_P3267118  | 8672 EIF4G3     | ENST00000374933 | 0,633046107 | 7,401014882 | 0,000135065 |
| A_24_P195037   | 148423 C1orf52  | ENST00000493514 | 0,632947164 | 8,57637796  | 3,73E-05    |
| A_32_P103633   | 4171 MCM2       | ENST00000265056 | 0,63225191  | 7,952817176 | 0,02928164  |
| A_23_P99138    | 51258 MRPL51    | ENST00000229238 | 0,63187856  | 11,02403787 | 0,005339987 |
| A_23_P69310    | 9034 CCRL2      | ENST00000400882 | 0,631564229 | 7,84881418  | 0,001825061 |
| A_23_P114232   | 10549 PRDX4     | ENST00000379341 | 0,631022444 | 9,912634046 | 0,025801131 |
| A_33_P3313595  | 984 CDK11B      | ENST00000341028 | 0,630028824 | 10,82266581 | 0,000655591 |
| A_24_P163113   | 55573 CDV3      | ENST00000431519 | 0,629932145 | 11,94436444 | 0,000486077 |
| A_23_P2431     | 719 C3AR1       | ENST00000307637 | 0,629660068 | 10,44052893 | 0,012041014 |
| A_23_P130089   | 90410 IFT20     | ENST00000322326 | 0,629474718 | 7,450701033 | 0,000253441 |
| A_23_P41854    | 84674 CARD6     | ENST00000254691 | 0,629346839 | 10,30089495 | 0,001709439 |
| A_23_P19691    | 23593 HEBP2     | ENST00000607197 | 0,629306867 | 12,163931   | 0,00322438  |
| A_23_P121064   | 5806 PTX3       | ENST00000295927 | 0,629141145 | 6,96984111  | 0,090432283 |
| A_33_P3409765  | 8972 MGAM       | NA              | 0,628787353 | 7,894259641 | 0,075880661 |
| A_33_P3263902  | 4601 MXI1       | ENST00000393134 | 0,627319227 | 9,013016882 | 0,091211541 |
| A_33_P3397865  | 7138 TNNT1      | ENST00000588981 | 0,626560407 | 8,932505841 | 0,058064072 |
| A_23_P256455   | 6119 RPA3       | ENST00000483031 | 0,626443354 | 9,625647609 | 0,004956407 |
| A_23_P425752   | 9830 TRIM14     | ENST00000342043 | 0,625729991 | 7,51407065  | 0,001649147 |
| A_23_P8013     | 8340 HIST1H2BL  | ENST00000377401 | 0,625550296 | 11,55644088 | 0,000674994 |
| A_33_P3340025  | 9837 GINS1      | ENST00000262460 | 0,624840687 | 6,767021979 | 0,010303292 |
| A_23_P420551   | 11113 CIT       | ENST00000545913 | 0,624662556 | 6,747298086 | 0,00301548  |
| A_33_P3212994  | 11130 ZWINT     | ENST00000318387 | 0,623838584 | 6,538245395 | 0,005412648 |
| A_21_P0000052  | 27185 DISC1     | ENST00000468399 | 0,622850104 | 8,438651079 | 0,018243943 |
| A_23_P122924   | 3624 INHBA      | ENST00000442711 | 0,622716945 | 6,514833681 | 0,096588789 |
| A_23_P122852   | 6604 SMARCD3    | ENST00000356800 | 0,62236119  | 11,29975164 | 0,009027536 |
| A_23_P306941   | 266747 RGL4     | ENST00000615003 | 0,62230981  | 10,95947831 | 0,075879089 |
| A_32_P150891   | 81624 DIAPH3    | ENST00000400324 | 0,622025272 | 6,348236751 | 0,000170499 |
| A_23_P59005    | 6890 TAP1       | ENST00000354258 | 0,620797538 | 13,63650534 | 0,033672507 |
| A_33_P3393573  | 5110 PCMT1      | ENST00000460828 | 0,620552922 | 9,033348826 | 0,000345637 |
| A_23_P153745   | 10437 IFI30     | ENST00000593731 | 0,62033814  | 15,17821977 | 0,047835467 |
| A_33_P3231297  | 8804 CREG1      | ENST00000370509 | 0,620265932 | 11,74635381 | 0,015614046 |
| A_23_P29422    | 2992 GYG1       | ENST00000296048 | 0,620127774 | 8,80983618  | 0,017302079 |
| A_32_P212058   | 84984 CEP19     | ENST00000409690 | 0,619940876 | 8,577547493 | 0,008160288 |
| A_23_P48596    | 6035 RNASE1     | ENST00000412779 | 0,619863021 | 9,104061153 | 0,008916716 |
| A_32_P347617   | 164668 APOBEC3H | ENST00000613677 | 0,619706415 | 7,123704188 | 0,001164406 |
| A_24_P148836   | 200942 KLHDC8B  | ENST00000459846 | 0,619100398 | 7,09993412  | 0,004071372 |
| A_23_P37441    | 567 B2M         | ENST00000557901 | 0,618977086 | 15,86373864 | 0,005606171 |
| A_23_P420196   | 8651 SOCS1      | ENST00000332029 | 0,618823015 | 8,539421424 | 0,073143432 |
| A_33_P3332955  | 51266 CLEC1B    | ENST00000348658 | 0,618688149 | 7,852771873 | 0,043360445 |

|                |                      |                 |             |             |             |
|----------------|----------------------|-----------------|-------------|-------------|-------------|
| A_24_P9883     | 91056 AP5B1          | ENST00000532090 | 0,61865254  | 8,940030859 | 0,011755022 |
| A_23_P127948   | 133 ADM              | ENST00000528655 | 0,617742238 | 11,65835045 | 0,09340089  |
| A_23_P127948   | 133 ADM              | ENST00000528655 | 0,617704284 | 11,62355848 | 0,085909038 |
| A_24_P334718   | 353345 GPR141        | ENST00000334425 | 0,617153203 | 7,083108809 | 0,000582995 |
| A_23_P45917    | 1163 CKS1B           | ENST00000477676 | 0,616882022 | 9,325256684 | 0,008282926 |
| A_23_P353717   | 116028 RMI2          | ENST00000572173 | 0,616831647 | 7,69890645  | 0,016358382 |
| A_24_P343095   | 1719 DHFR            | ENST00000513048 | 0,616705443 | 7,136431435 | 0,000909817 |
| A_33_P3306048  | 503645 DPRXP4        | NA              | 0,616533785 | 8,746806522 | 0,003204488 |
| A_32_P220715   | 81631 MAP1LC3B       | ENST00000556529 | 0,616302344 | 10,45269136 | 0,001355777 |
| A_23_P58321    | 890 CCNA2            | ENST00000618014 | 0,615483524 | 6,451706078 | 0,003238388 |
| A_23_P401904   | 26147 PHF19          | ENST00000312189 | 0,615396182 | 9,790994667 | 0,002486556 |
| A_33_P3410459  | 950 SCARB2           | ENST00000264896 | 0,615010132 | 10,18459953 | 0,015905026 |
| A_33_P3329255  | 8509 NDST2           | ENST00000398701 | 0,613652188 | 7,869726916 | 0,006221995 |
| A_23_P32404    | 3669 ISG20           | ENST00000558942 | 0,613471417 | 14,7796693  | 0,026625728 |
| A_24_P304723   | 5479 PPIB            | ENST00000558492 | 0,612561771 | 10,50253693 | 0,004159179 |
| A_23_P105571   | 56994 CHPT1          | ENST00000550385 | 0,61211577  | 8,993256199 | 0,073749987 |
| A_23_P37441    | 567 B2M              | ENST00000557901 | 0,612095479 | 15,63806653 | 0,005541963 |
| A_33_P3358099  | 342510 CD300E        | ENST00000392619 | 0,612025178 | 10,46676566 | 0,028759696 |
| A_23_P127948   | 133 ADM              | ENST00000528655 | 0,611784004 | 11,76482985 | 0,098347414 |
| A_23_P58321    | 890 CCNA2            | ENST00000618014 | 0,611428242 | 6,458792596 | 0,003615624 |
| A_23_P11461    | 7335 UBE2V1          | ENST00000490555 | 0,610959934 | 9,997240922 | 0,000404875 |
| A_23_P141974   | 7171 TPM4            | ENST00000520239 | 0,610789863 | 10,21016404 | 4,85E-05    |
| A_23_P119835   | 58484 NLRC4          | ENST00000404025 | 0,610669827 | 10,48013713 | 0,021736308 |
| A_23_P121064   | 5806 PTX3            | ENST00000295927 | 0,609383702 | 6,981560618 | 0,098600819 |
| A_24_P181677   | 80148 PQLC1          | ENST00000474967 | 0,608727168 | 8,880839871 | 0,031840094 |
| A_23_P130113   | 433 ASGR2            | ENST00000254850 | 0,607579215 | 10,10515211 | 0,082978011 |
| A_24_P257108   | 10010 TANK           | ENST00000441987 | 0,606908831 | 8,805360423 | 8,73E-05    |
| A_33_P3419733  | 80331 DNAJC5         | ENST00000360864 | 0,606390354 | 8,367578478 | 0,000316681 |
| A_23_P50368    | 126014 OSCAR         | ENST00000610577 | 0,60622884  | 11,98110272 | 0,001416506 |
| A_24_P218979   | 83461 CDCA3          | ENST00000536241 | 0,604827677 | 6,700891124 | 0,001424593 |
| A_23_P24515    | 38 ACAT1             | ENST00000533597 | 0,6048137   | 8,025528036 | 0,001517147 |
| A_23_P354547   | 10379 IRF9           | ENST00000558468 | 0,604271779 | 8,118512205 | 0,004069844 |
| A_23_P93282    | 8356 HIST1H3J        | ENST00000359303 | 0,603687912 | 11,43937462 | 0,000460317 |
| A_24_P167473   | 10094 ARPC3          | ENST00000467622 | 0,603258644 | 13,75071694 | 0,000562873 |
| A_33_P3292540  | 1031 CDKN2C          | ENST00000371761 | 0,603243847 | 7,394834338 | 0,001004217 |
| A_33_P3229122  | 8343 HIST1H2BF       | NA              | 0,602889761 | 7,554867388 | 0,013055028 |
| A_22_P00009369 | 790952 ESRG          | NA              | 0,602559203 | 6,597770481 | 0,089644416 |
| A_24_P283320   | 5110 PCMT1           | ENST00000367378 | 0,602307084 | 7,919292915 | 0,000243186 |
| A_23_P147805   | 7378 UPP1            | ENST00000457596 | 0,601886062 | 9,689305397 | 0,001382745 |
| A_33_P3345816  | 2852 GPER1           | ENST00000619052 | 0,601277934 | 6,838531001 | 0,01940064  |
| A_33_P3373364  | 25932 CLIC4          | ENST00000422221 | 0,601195248 | 7,416955412 | 0,005459398 |
| A_33_P3281795  | 11343 MGLL           | ENST00000434178 | 0,600881036 | 8,519625042 | 0,036524843 |
| A_33_P3360675  | 5575 PRKAR1B         | ENST00000430040 | 0,600860689 | 7,69032915  | 0,095449069 |
| A_23_P384517   | 2992 GYG1            | ENST00000345003 | 0,600125506 | 10,24510295 | 0,039901143 |
| A_23_P304287   | 5701 PSMC2           | ENST00000292644 | 0,599650357 | 9,491258063 | 0,001495374 |
| A_23_P157875   | 2219 FCN1            | ENST00000371806 | 0,599284595 | 14,12427266 | 0,029633814 |
| A_33_P3390580  | 9720 CCDC144A        | ENST00000436374 | 0,598775366 | 8,096754835 | 0,053671447 |
| A_23_P29257    | 3005 H1FO            | ENST00000340857 | 0,598628686 | 7,765875152 | 0,040558252 |
| A_21_P0000856  | 100288432 IL10RB-AS1 | NA              | 0,598529438 | 7,704661152 | 0,001790093 |
| A_23_P162874   | 3320 HSP90AA1        | ENST00000554401 | 0,598103718 | 11,34063787 | 0,007778589 |
| A_24_P86389    | 8336 HIST1H2AM       | ENST00000359611 | 0,597941486 | 11,66066958 | 0,002016893 |
| A_23_P160934   | 81611 ANP32E         | ENST00000616917 | 0,597420393 | 8,758304821 | 0,001357797 |
| A_24_P649624   | 23095 KIF1B          | ENST00000377093 | 0,597328201 | 7,936352094 | 0,00184152  |

|                |                 |                 |              |             |             |
|----------------|-----------------|-----------------|--------------|-------------|-------------|
| A_23_P31116    | 55856 ACOT13    | ENST00000476436 | 0,597307816  | 8,640292108 | 0,000433122 |
| A_33_P3220545  | 340024 SLC6A19  | ENST00000515652 | 0,596774721  | 6,69919452  | 0,073396177 |
| A_23_P428827   | 55122 AKIRIN2   | ENST00000257787 | 0,596646767  | 9,061113433 | 0,000472212 |
| A_23_P37441    | 567 B2M         | ENST00000557901 | 0,596506647  | 15,95947909 | 0,007862789 |
| A_33_P3423365  | 2934 GSN        | ENST00000449733 | 0,596142814  | 9,629762792 | 0,009059737 |
| A_22_P00008038 | 3490 IGFBP7     | ENST00000514062 | 0,5942098    | 9,217928771 | 0,00949696  |
| A_32_P70158    | 11025 LILRB3    | ENST00000346401 | 0,594156662  | 14,99925347 | 0,021999495 |
| A_23_P49768    | 51264 MRPL27    | ENST00000225969 | 0,593135665  | 9,233539919 | 0,0005029   |
| A_23_P105571   | 56994 CHPT1     | ENST00000550385 | 0,592822734  | 8,89479663  | 0,088229399 |
| A_33_P3807268  | 94236 DNAJA1P5  | NA              | 0,592750482  | 10,00050819 | 0,001609355 |
| A_23_P345591   | 5683 PSMA2      | ENST00000457444 | 0,592016274  | 10,26833655 | 0,01230303  |
| A_24_P196117   | 404672 GTF2H5   | ENST00000607778 | 0,591670727  | 9,018911328 | 0,004218142 |
| A_24_P12435    | 135112 NCOA7    | ENST00000368357 | 0,591333608  | 9,436955139 | 0,035367025 |
| A_33_P3388466  | 11119 BTN3A1    | ENST00000425234 | 0,591076768  | 8,568141853 | 0,005478395 |
| A_32_P134290   | 54877 ZCCHC2    | ENST00000269499 | 0,590590011  | 8,286151407 | 0,082997087 |
| A_33_P3211054  | 127396 ZNF684   | ENST00000472043 | 0,590472735  | 6,789858532 | 0,001983857 |
| A_19_P00801279 | 4478 MSN        | ENST00000429601 | 0,589438006  | 7,133449337 | 0,011978924 |
| A_23_P109881   | 3700 ITIH4      | ENST00000464000 | 0,58847882   | 9,286258901 | 0,001118149 |
| A_23_P144877   | 475 ATOX1       | ENST00000313115 | 0,588076465  | 9,950132637 | 7,09E-05    |
| A_23_P156180   | 6583 SLC22A4    | ENST00000200652 | 0,587981556  | 9,446812245 | 0,044637691 |
| A_23_P37441    | 567 B2M         | ENST00000557901 | 0,587878809  | 15,82084419 | 0,008149852 |
| A_33_P3400273  | 6402 SELL       | ENST00000236147 | 0,587239985  | 14,56883781 | 0,055461779 |
| A_23_P132936   | 60559 SPCS3     | ENST00000507678 | 0,58720967   | 10,40810959 | 0,006964461 |
| A_24_P160874   | 1854 DUT        | ENST00000617900 | 0,586939331  | 8,846341762 | 0,005538336 |
| A_23_P20122    | 56829 ZC3HAV1   | ENST00000471652 | 0,586926575  | 8,545514943 | 0,017169704 |
| A_23_P151791   | 1241 LTB4R      | ENST00000553481 | 0,586576281  | 8,911314093 | 0,001370419 |
| A_24_P286114   | 6507 SLC1A3     | ENST00000613445 | 0,586318095  | 6,47960774  | 0,031339181 |
| A_33_P3242483  | 394 ARHGAP5     | ENST00000345122 | -0,585416065 | 6,737050538 | 0,000101233 |
| A_33_P3414789  | 79187 FSD1      | ENST00000221856 | -0,585638028 | 7,813515925 | 0,071116796 |
| A_33_P3411427  | 116412 ZNF837   | ENST00000597582 | -0,58597795  | 7,947439793 | 0,001672127 |
| A_23_P109774   | 27107 ZBTB11    | ENST00000312938 | -0,586234023 | 8,624456224 | 0,003348099 |
| A_32_P98683    | 4302 MLLT6      | ENST00000618876 | -0,586262203 | 10,41583121 | 0,023830229 |
| A_24_P927189   | 92106 OXNAD1    | ENST00000285083 | -0,586292049 | 7,631291611 | 0,010545259 |
| A_22_P00003672 | 56882 CDC42SE1  | ENST00000491825 | -0,586554539 | 12,66340653 | 0,004766663 |
| A_23_P151565   | 253959 RALGAPA1 | ENST00000554259 | -0,586554634 | 8,055381943 | 0,001954305 |
| A_23_P100654   | 57659 ZBTB4     | ENST00000311403 | -0,586597322 | 9,092608868 | 0,007421917 |
| A_23_P354798   | 93058 COQ10A    | ENST00000308197 | -0,586692692 | 7,700244932 | 0,002773045 |
| A_23_P433785   | 5026 P2RX5      | ENST00000552456 | -0,587093577 | 8,748287245 | 0,040517154 |
| A_32_P87697    | 3122 HLA-DRA    | ENST00000613328 | -0,587343067 | 12,88771972 | 0,094734677 |
| A_23_P212715   | 868 CBLB        | ENST00000476370 | -0,587603631 | 9,224472119 | 0,013125035 |
| A_24_P944616   | 50809 HP1BP3    | ENST00000375003 | -0,587678186 | 11,14258696 | 0,003680179 |
| A_32_P60223    | 84289 ING5      | ENST00000313552 | -0,587867603 | 7,342522088 | 0,00094064  |
| A_23_P12343    | 2947 GSTM3      | ENST00000488824 | -0,588105594 | 7,759596997 | 0,09131     |
| A_23_P38219    | 10594 PRPF8     | ENST00000572723 | -0,588329917 | 10,13679601 | 0,000790579 |
| A_23_P100654   | 57659 ZBTB4     | ENST00000311403 | -0,590458383 | 9,103028876 | 0,01104268  |
| A_24_P267293   | 23098 SARM1     | ENST00000585482 | -0,592384516 | 7,823768503 | 0,001391849 |
| A_23_P94095    | 157567 ANKRD46  | ENST00000520311 | -0,592991479 | 7,156336073 | 0,001581818 |
| A_23_P566      | 22887 FOXJ3     | ENST00000361346 | -0,593309113 | 9,802359078 | 0,001784503 |
| A_33_P3382746  | 3932 LCK        | ENST00000469765 | -0,593323359 | 11,24808779 | 0,005932897 |
| A_23_P500601   | 89122 TRIM4     | ENST00000355947 | -0,593865376 | 10,07411014 | 0,002932702 |
| A_23_P20463    | 5885 RAD21      | ENST00000297338 | -0,594000533 | 10,7075588  | 0,03396901  |
| A_23_P336198   | 113263 GLCCI1   | ENST00000482540 | -0,594033393 | 8,211090792 | 0,041360162 |
| A_19_P00801042 | 7643 ZNF90      | ENST00000469078 | -0,594956259 | 11,98008654 | 0,010314799 |

|               |                  |                 |              |             |             |
|---------------|------------------|-----------------|--------------|-------------|-------------|
| A_23_P120710  | 7267 TTC3        | ENST00000355666 | -0,595186894 | 8,104544137 | 0,00053076  |
| A_23_P32414   | 51765 STK26      | ENST00000394334 | -0,595280531 | 9,725514815 | 0,051765507 |
| A_23_P205389  | 64112 MOAP1      | ENST00000556883 | -0,595467057 | 8,077141089 | 0,00045111  |
| A_23_P106727  | 9727 RAB11FIP3   | ENST00000611004 | -0,595902205 | 8,198457672 | 0,000452934 |
| A_23_P117928  | 22893 BAHD1      | ENST00000561234 | -0,596142991 | 9,678256355 | 0,001439193 |
| A_23_P122531  | 50854 C6orf48    | ENST00000375640 | -0,59625819  | 12,34428277 | 0,013973993 |
| A_33_P3226605 | 11168 PSIP1      | ENST00000380733 | -0,596284597 | 9,436686013 | 0,00593055  |
| A_24_P182947  | 257144 GCSAM     | ENST00000308910 | -0,596949063 | 6,81909977  | 0,000475296 |
| A_33_P3257861 | 1757 SARDH       | ENST00000439388 | -0,59703254  | 7,738834583 | 0,002161614 |
| A_33_P3227944 | 147081 CRHR1-IT1 | ENST00000586362 | -0,597067245 | 7,161351113 | 0,000843416 |
| A_24_P320254  | 3187 HNRNPH1     | ENST00000510678 | -0,597718317 | 11,64914742 | 0,018040611 |
| A_23_P162037  | 406 ARNTL        | ENST00000472842 | -0,597964086 | 9,691156993 | 0,002336016 |
| A_23_P363399  | 81539 SLC38A1    | ENST00000439706 | -0,598599764 | 10,42498207 | 0,018154886 |
| A_32_P41065   | 23023 TMCC1      | ENST00000426664 | -0,599263588 | 8,817378709 | 0,007319103 |
| A_23_P109774  | 27107 ZBTB11     | ENST00000312938 | -0,599523261 | 8,753561209 | 0,003418016 |
| A_23_P9135    | 79937 CNTNAP3    | ENST00000377561 | -0,599734113 | 6,870958748 | 0,056046823 |
| A_23_P120710  | 7267 TTC3        | ENST00000355666 | -0,599811396 | 7,998849025 | 0,000677632 |
| A_24_P411186  | 53335 BCL11A     | ENST00000335712 | -0,600013358 | 7,502810593 | 0,000491843 |
| A_33_P3685216 | 1 A1BG           | ENST00000598345 | -0,60032238  | 8,320137027 | 0,000350396 |
| A_23_P122805  | 84928 TMEM209    | ENST00000397622 | -0,601000551 | 7,840312709 | 0,004296835 |
| A_23_P118306  | 9093 DNAJA3      | ENST00000612103 | -0,60101513  | 9,201530643 | 0,004376569 |
| A_24_P759674  | 79991 OBFC1      | NA              | -0,601018052 | 7,397450447 | 4,64E-05    |
| A_33_P3234277 | 3113 HLA-DPA1    | ENST00000463243 | -0,601433964 | 12,55387231 | 0,075585417 |
| A_23_P157283  | 79161 TMEM243    | ENST00000481425 | -0,602624579 | 9,227465132 | 0,000307507 |
| A_23_P100654  | 57659 ZBTB4      | ENST00000311403 | -0,602744429 | 9,195454451 | 0,006818111 |
| A_33_P3718269 | 406938 MIR146A   | ENST00000517927 | -0,603306301 | 6,646811968 | 7,00E-05    |
| A_32_P104746  | 57732 ZFYVE28    | ENST00000290974 | -0,60400914  | 7,711769266 | 0,00491659  |
| A_23_P122531  | 50854 C6orf48    | ENST00000375640 | -0,604071356 | 12,03697406 | 0,01022654  |
| A_23_P215931  | 23484 LEPROTL1   | ENST00000321250 | -0,604146258 | 10,6271287  | 0,041957697 |
| A_23_P29836   | 131616 TMEM42    | ENST00000477126 | -0,604636796 | 9,637847186 | 0,005735204 |
| A_33_P3638471 | 6981 TRGV7       | NA              | -0,604838503 | 7,561982878 | 0,018154886 |
| A_33_P3411397 | 293 SLC25A6      | ENST00000381401 | -0,605038959 | 14,13853288 | 0,004273233 |
| A_23_P103442  | 64769 MEAF6      | ENST00000487788 | -0,605149454 | 9,7453803   | 0,00172596  |
| A_23_P164773  | 2208 FCER2       | ENST00000597934 | -0,605262396 | 6,836423558 | 0,005805661 |
| A_33_P3400324 | 80012 PHC3       | ENST00000495893 | -0,605571301 | 10,04037522 | 0,012901704 |
| A_23_P37623   | 23015 GOLGA8A    | ENST00000432566 | -0,607871072 | 7,666915351 | 0,001739745 |
| A_23_P106727  | 9727 RAB11FIP3   | ENST00000611004 | -0,607888813 | 8,100443344 | 0,000446292 |
| A_23_P338952  | 64766 S100BPB    | ENST00000373475 | -0,609383617 | 9,172103705 | 0,000664768 |
| A_23_P130836  | 3004 GZMM        | ENST00000264553 | -0,609449726 | 10,889861   | 0,01859339  |
| A_23_P110882  | 23270 TSPYL4     | ENST00000420283 | -0,609988421 | 8,083866895 | 0,000438576 |
| A_24_P234732  | 10608 MXD4       | ENST00000337190 | -0,610199439 | 8,071623095 | 0,000189071 |
| A_23_P13604   | 5037 PEBP1       | ENST00000261313 | -0,610725114 | 11,02862865 | 0,039186136 |
| A_23_P80278   | 9814 SFI1        | ENST00000464333 | -0,610731137 | 10,2252273  | 0,013880069 |
| A_33_P3379371 | 6259 RYK         | ENST00000473208 | -0,610743659 | 8,630200929 | 0,006274819 |
| A_23_P117928  | 22893 BAHD1      | ENST00000561234 | -0,611178182 | 9,658259835 | 0,000667768 |
| A_23_P69877   | 643836 ZFP62     | ENST00000512132 | -0,611458963 | 8,728859082 | 0,011529424 |
| A_23_P337726  | 4508 ATP6        | ENST00000361899 | -0,611653427 | 14,03312081 | 0,004565781 |
| A_23_P207742  | 7067 THRA        | ENST00000264637 | -0,611656202 | 10,19047556 | 0,00123832  |
| A_23_P131676  | 57007 ACKR3      | ENST00000272928 | -0,611806007 | 7,104557628 | 0,000891954 |
| A_32_P37592   | 677769 SCARNA17  | NA              | -0,611820658 | 13,79353365 | 0,023629117 |
| A_23_P212002  | 4820 NKTR        | ENST00000617821 | -0,612560305 | 10,12932265 | 0,006291545 |
| A_23_P417148  | 10743 RAI1       | ENST00000353383 | -0,612569427 | 7,371572792 | 0,000307507 |
| A_23_P109636  | 26018 LRIG1      | ENST00000496559 | -0,613873722 | 8,401012119 | 0,0005029   |



|                |                    |                 |              |             |             |
|----------------|--------------------|-----------------|--------------|-------------|-------------|
| A_23_P109636   | 26018 LRIG1        | ENST00000496559 | -0,613983554 | 8,402757379 | 0,000638084 |
| A_23_P120710   | 7267 TTC3          | ENST00000355666 | -0,614305457 | 8,023163922 | 0,000628014 |
| A_23_P152807   | 55316 RSAD1        | ENST00000258955 | -0,614384254 | 9,533209458 | 0,001167832 |
| A_23_P135084   | 6130 RPL7A         | ENST00000588490 | -0,614663652 | 15,41199818 | 0,016222086 |
| A_24_P89891    | 7185 TRAF1         | ENST00000373887 | -0,614736153 | 8,056950818 | 0,004572866 |
| A_23_P371885   | 51326 ARL17A       | ENST00000615623 | -0,615036289 | 8,534407793 | 0,017877516 |
| A_23_P33809    | 55272 IMP3         | ENST00000403490 | -0,615541138 | 10,70581275 | 0,002486556 |
| A_23_P156327   | 7045 TGFBI         | ENST00000504411 | -0,615904137 | 12,50412992 | 0,065589154 |
| A_23_P109774   | 27107 ZBTB11       | ENST00000312938 | -0,615939428 | 8,478022727 | 0,001138705 |
| A_21_P0011808  | 375248 ANKRD36     | ENST00000295246 | -0,616032393 | 9,550760388 | 0,003507094 |
| A_23_P1594     | 7423 VEGFB         | ENST00000426086 | -0,616045461 | 10,76863928 | 0,00102887  |
| A_23_P56328    | 83483 PLVAP        | ENST00000252590 | -0,616467037 | 6,709288878 | 0,002459429 |
| A_33_P3341601  | 349136 WDR86       | ENST00000621812 | -0,616589571 | 6,923214395 | 0,001460831 |
| A_23_P99771    | 9240 PNMA1         | ENST00000316836 | -0,616646511 | 9,439035999 | 0,000433122 |
| A_33_P3294252  | 466 ATF1           | ENST00000262053 | -0,616764905 | 8,103580337 | 0,018895912 |
| A_23_P96777    | 57470 LRRC47       | ENST00000378251 | -0,617579995 | 9,56543927  | 0,00129207  |
| A_24_P926960   | 1953 MEGF6         | NA              | -0,617718328 | 7,497655829 | 0,000346029 |
| A_24_P916496   | 5578 PRKCA         | ENST00000413366 | -0,618201563 | 8,593750394 | 0,003156576 |
| A_22_P00007531 | 641518 LEF1-AS1    | NA              | -0,618421336 | 6,996781384 | 0,010807276 |
| A_33_P3250840  | 123606 NIPA1       | ENST00000437912 | -0,618627376 | 7,536633172 | 0,000704836 |
| A_22_P00007370 | 100506915 CHR3-AS2 | NA              | -0,618674299 | 6,975263449 | 0,005327183 |
| A_23_P82324    | 84433 CARD11       | ENST00000396946 | -0,618842661 | 8,225064407 | 0,008562434 |
| A_23_P118306   | 9093 DNAJA3        | ENST00000612103 | -0,618849533 | 9,173144286 | 0,0025404   |
| A_24_P250650   | 11159 RABL2A       | ENST00000452831 | -0,619017035 | 10,45833602 | 0,001862182 |
| A_23_P122531   | 50854 C6orf48      | ENST00000375640 | -0,620686701 | 12,00561448 | 0,011409609 |
| A_23_P120710   | 7267 TTC3          | ENST00000355666 | -0,62105696  | 8,138328244 | 0,000700271 |
| A_24_P354724   | 117289 TAGAP       | ENST00000326965 | -0,621339267 | 10,95254023 | 0,004885734 |
| A_23_P387523   | 9923 ZBTB40        | ENST00000374651 | -0,6220611   | 9,298351435 | 0,000759722 |
| A_24_P248053   | 116447 TOP1MT      | ENST00000517857 | -0,622068301 | 9,38021248  | 0,000331248 |
| A_23_P27381    | 10194 TSHZ1        | ENST00000584217 | -0,622425115 | 8,5689393   | 0,002488169 |
| A_33_P3385488  | 6222 RPS18         | ENST00000412454 | -0,622431417 | 12,93722487 | 0,065380188 |
| A_23_P128663   | 26278 SACS         | ENST00000382292 | -0,622520644 | 7,312470035 | 0,003093374 |
| A_24_P252130   | 5467 PPARD         | ENST00000311565 | -0,622791362 | 9,836375725 | 0,001877848 |
| A_33_P3342410  | 29904 EEF2K        | ENST00000263026 | -0,622791508 | 8,409835559 | 0,001059935 |
| A_23_P57667    | 5361 PLXNA1        | ENST00000393409 | -0,622964839 | 7,910709186 | 0,009651812 |
| A_23_P120710   | 7267 TTC3          | ENST00000355666 | -0,623025914 | 8,002249526 | 0,000788082 |
| A_23_P146849   | 321 APBA2          | ENST00000620457 | -0,623054245 | 6,761344579 | 0,000555996 |
| A_24_P419300   | 25845 PP7080       | ENST00000454935 | -0,623457065 | 7,378284313 | 0,000554994 |
| A_23_P100654   | 57659 ZBTB4        | ENST00000311403 | -0,623570529 | 9,154677348 | 0,006648697 |
| A_24_P363087   | 51149 C5orf45      | ENST00000610475 | -0,624282123 | 9,67227265  | 0,001473788 |
| A_33_P3323803  | 9659 PDE4DIP       | ENST00000369356 | -0,624495231 | 7,119584394 | 0,00019119  |
| A_23_P43369    | 27240 SIT1         | ENST00000474403 | -0,624540417 | 8,852236712 | 0,008562434 |
| A_23_P346376   | 27334 P2RY10       | ENST00000475374 | -0,624559152 | 7,023687661 | 5,03E-05    |
| A_33_P3254320  | 10045 SH2D3A       | ENST00000245908 | -0,624952362 | 9,246240233 | 0,008185106 |
| A_24_P413126   | 56937 PMEPA1       | ENST00000265626 | -0,625154055 | 6,677139119 | 3,39E-05    |
| A_23_P14165    | 2841 GPR18         | ENST00000340807 | -0,625210501 | 8,008343466 | 0,005412648 |
| A_23_P87560    | 694 BTG1           | ENST00000256015 | -0,625314395 | 11,35361542 | 0,000562873 |
| A_23_P118306   | 9093 DNAJA3        | ENST00000612103 | -0,625557131 | 9,452546053 | 0,005144556 |
| A_22_P00015497 | 100506776 TRG-AS1  | NA              | -0,625600138 | 9,026468197 | 0,021882174 |
| A_33_P3262555  | 399664 MEX3D       | ENST00000402693 | -0,626317018 | 11,05082655 | 0,000745722 |
| A_23_P209700   | 10316 NMUR1        | ENST00000305141 | -0,626729793 | 8,769017414 | 0,065144367 |
| A_33_P3329444  | 284358 MAMSTR      | ENST00000594582 | -0,626982874 | 6,772335578 | 0,001770683 |
| A_32_P99100    | 5796 PTPRK         | ENST00000619256 | -0,627129429 | 6,702179842 | 9,46E-05    |

|                |                    |                 |              |             |             |
|----------------|--------------------|-----------------|--------------|-------------|-------------|
| A_33_P3387691  | 256380 SCML4       | ENST00000369022 | -0,627749528 | 10,88253923 | 0,094787072 |
| A_24_P67308    | 100129424 RPL19P12 | ENST00000432746 | -0,628061763 | 14,0507557  | 0,002343706 |
| A_32_P169179   | 55545 MSX2P1       | NA              | -0,628250982 | 7,225232354 | 0,003276576 |
| A_23_P89310    | 22905 EPN2         | ENST00000314728 | -0,628267981 | 8,335484847 | 0,001515789 |
| A_33_P3366336  | 388228 SBK1        | ENST00000341901 | -0,628456102 | 9,284073391 | 0,063159683 |
| A_23_P31765    | 5569 PKIA          | ENST00000352966 | -0,628790827 | 7,681065804 | 0,001502242 |
| A_33_P3368014  | 84329 HVCN1        | ENST00000356742 | -0,629484056 | 9,436845737 | 0,000269187 |
| A_33_P3388651  | 3983 ABLIM1        | ENST00000277895 | -0,629563318 | 8,466088132 | 0,023626047 |
| A_33_P3358923  | 151888 BTLA        | ENST00000334529 | -0,63020862  | 7,29642932  | 0,002688785 |
| A_32_P71113    | 286205 SCAI        | ENST00000336505 | -0,630526803 | 7,038773566 | 0,001603957 |
| A_23_P120710   | 7267 TTC3          | ENST00000355666 | -0,630683132 | 7,996309082 | 0,000891954 |
| A_23_P345460   | 25894 PLEKHG4      | ENST00000379344 | -0,630708804 | 7,306987756 | 0,007924466 |
| A_24_P354715   | 4907 NT5E          | ENST00000257770 | -0,631236475 | 6,532940584 | 5,72E-06    |
| A_23_P50775    | 79414 LRFN3        | ENST00000246529 | -0,631330736 | 8,481410579 | 0,040391529 |
| A_23_P19517    | 3710 ITPR3         | ENST00000605930 | -0,632392474 | 8,120498667 | 0,01283471  |
| A_19_P00322948 | 641638 SNHG6       | ENST00000520619 | -0,632981721 | 11,14314989 | 0,009836513 |
| A_24_P294124   | 9792 SERTAD2       | ENST00000313349 | -0,633991273 | 8,718637191 | 0,000313104 |
| A_33_P3344204  | 79844 ZDHHC11      | ENST00000283441 | -0,634468128 | 7,938924356 | 0,019758498 |
| A_24_P943193   | 9581 PREPL         | ENST00000409936 | -0,634861761 | 7,643259223 | 0,004196077 |
| A_23_P47517    | 55048 VPS37C       | ENST00000301765 | -0,63492417  | 10,54169015 | 0,000603178 |
| A_24_P319647   | 79368 FCRL2        | ENST00000469986 | -0,634934111 | 7,574760867 | 0,015653704 |
| A_33_P3246163  | 6125 RPL5          | ENST00000425640 | -0,635008809 | 14,08888582 | 0,031105163 |
| A_33_P3221680  | 6234 RPS28         | NA              | -0,635329058 | 15,75924908 | 0,006441867 |
| A_23_P131096   | 5442 POLRMT        | ENST00000589961 | -0,635416495 | 9,75042032  | 0,002185335 |
| A_23_P147888   | 6181 RPLP2         | ENST00000321153 | -0,635741184 | 16,97067821 | 0,001267369 |
| A_23_P8108     | 3119 HLA-DQB1      | ENST00000475182 | -0,636693065 | 12,00216898 | 0,043639354 |
| A_23_P122906   | 26053 AUTS2        | ENST00000611706 | -0,636830634 | 8,003058222 | 0,04231098  |
| A_22_P00015308 | 27040 LAT          | ENST00000562701 | -0,637380777 | 9,5339064   | 0,001288918 |
| A_33_P3333826  | 92912 UBE2Q2       | ENST00000426727 | -0,638172842 | 8,903329092 | 0,011408252 |
| A_24_P237389   | 1964 EIF1AX        | ENST00000379607 | -0,638358888 | 7,980309831 | 0,008315538 |
| A_23_P100420   | 23174 ZCCHC14      | ENST00000568020 | -0,638543977 | 7,748272895 | 3,73E-05    |
| A_23_P12896    | 2188 FANCF         | ENST00000327470 | -0,639125297 | 8,176422439 | 0,001382745 |
| A_23_P141505   | 10462 CLEC10A      | ENST00000571664 | -0,639652194 | 8,291803577 | 0,017534698 |
| A_32_P193288   | 6142 RPL18A        | ENST00000456046 | -0,639761426 | 14,71513815 | 0,007932581 |
| A_33_P3372074  | 3993 LLGL2         | ENST00000578638 | -0,641615534 | 10,54373515 | 0,040624373 |
| A_33_P3287223  | 1803 DPP4          | ENST00000360534 | -0,641972723 | 7,953980746 | 0,011648578 |
| A_23_P169838   | 23353 SUN1         | ENST00000413171 | -0,642558547 | 7,99760546  | 0,001993211 |
| A_33_P3368830  | 4063 LY9           | ENST00000368039 | -0,642619675 | 9,718646768 | 0,001882571 |
| A_23_P117928   | 22893 BAHD1        | ENST00000561234 | -0,644302459 | 9,530335331 | 0,000438576 |
| A_33_P3663705  | 9696 CROCC         | ENST00000375541 | -0,644362624 | 8,685222788 | 0,001998959 |
| A_24_P272061   | 23521 RPL13A       | ENST00000430133 | -0,645617841 | 14,29759119 | 0,005784716 |
| A_33_P3296308  | 54876 DCAF16       | ENST00000382247 | -0,645719721 | 9,347039407 | 0,000498401 |
| A_23_P26905    | 11232 POLG2        | ENST00000577506 | -0,645875039 | 9,061163587 | 0,001509152 |
| A_23_P371215   | 29851 ICOS         | ENST00000316386 | -0,646340909 | 8,36419545  | 0,026426246 |
| A_23_P128281   | 3823 KLRC3         | ENST00000381903 | -0,647351281 | 7,196912896 | 0,020872295 |
| A_23_P68031    | 6775 STAT4         | ENST00000392320 | -0,647901117 | 9,571948116 | 0,010929622 |
| A_24_P7085     | 118432 RPL29P2     | ENST00000488409 | -0,64830384  | 11,52814623 | 0,00129207  |
| A_23_P109636   | 26018 LRIG1        | ENST00000496559 | -0,649628383 | 8,555778989 | 0,000616194 |
| A_32_P45493    | 10772 SRSF10       | ENST00000341154 | -0,649775367 | 9,085683103 | 0,013958174 |
| A_23_P117928   | 22893 BAHD1        | ENST00000561234 | -0,650398276 | 9,482386232 | 0,000438576 |
| A_23_P65983    | 92922 CCDC102A     | ENST00000569068 | -0,650942842 | 7,797173266 | 0,004383618 |
| A_32_P42197    | 3178 HNRNPA1       | ENST00000340913 | -0,650964575 | 13,1154598  | 0,023210077 |
| A_23_P109636   | 26018 LRIG1        | ENST00000496559 | -0,650979952 | 8,406866897 | 0,000228567 |

|               |                      |                        |              |             |             |
|---------------|----------------------|------------------------|--------------|-------------|-------------|
| A_33_P3390758 | 3312 HSPA8           | ENST00000453788        | -0,651022784 | 11,14291401 | 0,007343803 |
| A_24_P289178  | 404550 C16orf74      | ENST00000284245        | -0,652652523 | 7,172637327 | 7,84E-05    |
| A_23_P318581  | 57587 CFAP97         | ENST00000458385        | -0,652720062 | 8,581229483 | 0,00410102  |
| A_23_P31335   | 7559 ZNF12           | ENST00000342651        | -0,653473466 | 8,693317715 | 0,001174367 |
| A_24_P236091  | 2026 ENO2            | ENST00000535366        | -0,65442623  | 7,381425107 | 0,000416184 |
| A_23_P122906  | 26053 AUTS2          | ENST00000611706        | -0,654866708 | 7,996105421 | 0,03897794  |
| A_23_P315571  | 23180 RFTN1          | ENST00000334133        | -0,655070686 | 10,10724489 | 0,005793267 |
| A_33_P3282836 | 6234 RPS28           | ENST00000417088        | -0,655570679 | 16,33081094 | 0,014970461 |
| A_24_P56689   | 7755 ZNF205          | ENST00000219091        | -0,655757411 | 10,02876484 | 0,031657187 |
| A_23_P125748  | 84460 ZMAT1          | ENST00000488347        | -0,657879893 | 8,185483075 | 0,000786688 |
| A_33_P3214625 | 8821 INPP4B          | ENST00000262992        | -0,657918968 | 8,275637157 | 0,01493655  |
| A_23_P251881  | 259197 NCR3          | ENST00000376073        | -0,658031335 | 10,62370017 | 0,05145468  |
| A_24_P115932  | 11251 PTGDR2         | ENST00000332539        | -0,658198065 | 7,370888999 | 0,008434994 |
| A_23_P122906  | 26053 AUTS2          | ENST00000611706        | -0,658298798 | 7,978939644 | 0,02760154  |
| A_33_P3340060 | 23521 RPL13A         | ENST00000446057        | -0,65837033  | 13,84762475 | 0,013635473 |
| A_23_P149368  | 115350 FCRL1         | ENST00000495126        | -0,658473425 | 7,561928033 | 0,012932163 |
| A_24_P122050  | 9491 PSMF1           | ENST00000381899        | -0,658888167 | 10,42174724 | 0,032761611 |
| A_23_P252155  | 55342 STRBP          | ENST00000407982        | -0,659033165 | 8,757968213 | 0,003021366 |
| A_23_P83028   | 8434 RECK            | ENST00000377966        | -0,659479568 | 7,194971683 | 0,001115737 |
| A_23_P132536  | 22906 TRAK1          | ENST00000487159        | -0,660408746 | 8,894645181 | 1,55E-05    |
| A_23_P21057   | 1731                 | Sep 01 ENST00000566517 | -0,660481977 | 9,013652392 | 0,009837012 |
| A_23_P393051  | 126695 KDF1          | ENST00000616918        | -0,660485779 | 6,749919241 | 7,84E-05    |
| A_23_P170857  | 3556 IL1RAP          | ENST00000447382        | -0,661238751 | 8,479788779 | 0,031291909 |
| A_24_P276576  | 84824 FCRLA          | ENST00000367950        | -0,662812526 | 6,812535925 | 0,000966025 |
| A_23_P100654  | 57659 ZBTB4          | ENST00000311403        | -0,663679767 | 9,038576992 | 0,002960657 |
| A_23_P78888   | 2091 FBL             | ENST00000593503        | -0,663910335 | 13,20878596 | 0,01053528  |
| A_23_P24763   | 6207 RPS13           | ENST00000525828        | -0,664623243 | 15,02198517 | 0,002176262 |
| A_23_P24433   | 8722 CTSF            | ENST00000527141        | -0,66556407  | 8,892722917 | 0,009899376 |
| A_23_P433676  | 57711 ZNF529         | ENST00000591340        | -0,665950446 | 7,413019954 | 9,24E-05    |
| A_33_P3383912 | 3125 HLA-DRB3        | ENST00000412634        | -0,666298614 | 12,32841852 | 0,051643475 |
| A_33_P3369761 | 54704 PDP1           | ENST00000396200        | -0,66660137  | 8,666211659 | 0,015772377 |
| A_33_P3280993 | 414777 HCG18         | NA                     | -0,666984226 | 8,637229149 | 0,001238715 |
| A_23_P109636  | 26018 LRIG1          | ENST00000496559        | -0,667628944 | 8,598982332 | 0,000439905 |
| A_32_P208120  | 57118 CAMK1D         | ENST00000615792        | -0,667830854 | 10,51023408 | 0,001118149 |
| A_23_P145024  | 154 ADRB2            | ENST00000305988        | -0,668016356 | 10,50497692 | 0,004598292 |
| A_23_P122906  | 26053 AUTS2          | ENST00000611706        | -0,668839642 | 8,022125403 | 0,036587605 |
| A_23_P122906  | 26053 AUTS2          | ENST00000611706        | -0,670139698 | 8,28529985  | 0,055461779 |
| A_23_P206228  | 54832 VPS13C         | ENST00000560637        | -0,670358849 | 8,983102634 | 0,005434711 |
| A_24_P763243  | 1915 EEF1A1          | ENST00000434005        | -0,671371642 | 15,83449231 | 0,045004981 |
| A_32_P52609   | 23175 LPIN1          | ENST00000396097        | -0,67197369  | 9,550265532 | 0,005308887 |
| A_33_P3369461 | 57463 AMIGO1         | ENST00000369862        | -0,674451976 | 8,107750328 | 0,005735409 |
| A_24_P317835  | 56623 INPP5E         | ENST00000371712        | -0,675015075 | 9,027928318 | 0,000745722 |
| A_23_P122906  | 26053 AUTS2          | ENST00000611706        | -0,675523344 | 8,147129012 | 0,045138833 |
| A_21_P0000841 | 100505483 PRKAG2-AS1 | NA                     | -0,676192967 | 7,855749811 | 0,000546257 |
| A_24_P135902  | 6187 RPS2            | ENST00000402069        | -0,676826866 | 15,34119073 | 0,004329079 |
| A_23_P142146  | 6141 RPL18           | ENST00000549370        | -0,677127453 | 14,69240652 | 0,005153275 |
| A_32_P147622  | 100289410 MCF2L-AS1  | NA                     | -0,677345523 | 6,954338316 | 9,55E-05    |
| A_23_P362183  | 203286 ANKS6         | ENST00000353234        | -0,677684359 | 8,04313164  | 0,00467174  |
| A_33_P3289121 | 84417 C2orf40        | ENST00000479337        | -0,677784472 | 6,558053831 | 0,000216196 |
| A_23_P140290  | 6252 RTN1            | ENST00000557422        | -0,678080854 | 7,126107081 | 0,001633117 |
| A_23_P121250  | 1974 EIF4A2          | ENST00000496382        | -0,67857185  | 11,22071765 | 0,008160288 |
| A_24_P47467   | 79073 TMEM109        | ENST00000227525        | -0,679828196 | 10,31764541 | 0,00532541  |
| A_23_P53646   | 4673 NAP1L1          | ENST00000261182        | -0,680135564 | 10,22314536 | 0,001370555 |

|                |                  |                 |              |             |             |
|----------------|------------------|-----------------|--------------|-------------|-------------|
| A_33_P3234317  | 22800 RRAS2      | ENST00000537760 | -0,680720293 | 7,928539056 | 0,006552258 |
| A_33_P3366039  | 6159 RPL29       | ENST00000451924 | -0,68126042  | 11,08253369 | 0,00108091  |
| A_33_P3287959  | 10156 RASA4      | ENST00000262940 | -0,681663717 | 9,369187799 | 0,038224098 |
| A_23_P398294   | 9026 HIP1R       | ENST00000253083 | -0,682563357 | 9,750534069 | 0,021693057 |
| A_33_P3221458  | 7754 ZNF204P     | ENST00000416749 | -0,683715348 | 6,663001536 | 0,000594114 |
| A_23_P15146    | 9235 IL32        | ENST00000529550 | -0,684377443 | 12,06480702 | 0,023804059 |
| A_23_P345799   | 199786 FAM129C   | ENST00000332386 | -0,68462271  | 7,156389484 | 0,001089158 |
| A_33_P3323722  | 10123 ARL4C      | ENST00000390645 | -0,685167777 | 11,4981371  | 0,017449681 |
| A_24_P97374    | 8320 EOMES       | ENST00000449599 | -0,686903907 | 8,54390079  | 0,016943226 |
| A_23_P70670    | 9308 CD83        | ENST00000379153 | -0,687388267 | 8,198467718 | 0,00345736  |
| A_23_P109636   | 26018 LRIG1      | ENST00000496559 | -0,687403592 | 8,46232823  | 0,000229335 |
| A_23_P22672    | 79868 ALG13      | ENST00000624161 | -0,687412202 | 8,808793911 | 0,00546605  |
| A_33_P3271051  | 9265 CYTH3       | ENST00000396741 | -0,688154744 | 8,396527824 | 0,000488184 |
| A_33_P3359306  | 9112 MTA1        | ENST00000552286 | -0,688549915 | 9,836487354 | 0,000350396 |
| A_33_P3239347  | 4824 NKX3-1      | ENST00000380871 | -0,689218506 | 6,88329472  | 0,045410806 |
| A_23_P316460   | 113763 ZBED6CL   | ENST00000343855 | -0,689470254 | 8,314061378 | 0,000245365 |
| A_23_P211207   | 104 ADARB1       | ENST00000437626 | -0,689964232 | 8,985265191 | 0,00337024  |
| A_23_P109636   | 26018 LRIG1      | ENST00000496559 | -0,690943328 | 8,632782776 | 0,000472212 |
| A_23_P93524    | 154075 SAMD3     | ENST00000437477 | -0,69258762  | 9,006204338 | 0,017083269 |
| A_33_P3212172  | 79856 SNX22      | ENST00000557789 | -0,693043513 | 8,072073252 | 0,001002298 |
| A_33_P3373375  | 975 CD81         | ENST00000468153 | -0,693410219 | 11,23182753 | 0,00579525  |
| A_23_P33759    | 9249 DHRS3       | ENST00000616661 | -0,693434085 | 9,113376513 | 0,008597124 |
| A_23_P78742    | 2323 FLT3LG      | ENST00000593422 | -0,693532297 | 9,088736123 | 0,009495455 |
| A_23_P404091   | 134266 GRPEL2    | ENST00000507562 | -0,693622048 | 7,77531446  | 0,000595549 |
| A_23_P112798   | 1397 CRIP2       | ENST00000548309 | -0,693725484 | 6,793113903 | 8,96E-05    |
| A_23_P6293     | 53347 UBASH3A    | ENST00000473381 | -0,694589206 | 8,343261514 | 0,006803929 |
| A_32_P17635    | 10929 SRSF8      | ENST00000587424 | -0,695283746 | 8,328898786 | 0,000135368 |
| A_33_P3411388  | 340260 UNCX      | ENST00000316333 | -0,695615748 | 12,33531131 | 0,000907494 |
| A_23_P393777   | 5729 PTGDR       | ENST00000306051 | -0,696928554 | 8,256463576 | 0,007847554 |
| A_23_P99661    | 55701 ARHGEF40   | ENST00000553709 | -0,698078729 | 11,25419094 | 0,039541076 |
| A_33_P3326992  | 9659 PDE4DIP     | ENST00000369356 | -0,698885729 | 7,099910335 | 0,0003415   |
| A_33_P3334308  | 158586 ZXDB      | ENST00000374888 | -0,699676807 | 7,874499924 | 0,000531613 |
| A_32_P210252   | 6146 RPL22       | ENST00000234875 | -0,700343755 | 12,17963815 | 0,00390955  |
| A_23_P167599   | 54463 FAM134B    | ENST00000306320 | -0,700985912 | 7,894519758 | 0,007377175 |
| A_24_P358164   | 653162 RPSAP9    | ENST00000483479 | -0,702595264 | 12,87041499 | 0,012320597 |
| A_23_P218549   | 84658 EMR3       | ENST00000253673 | -0,702611174 | 10,19459393 | 0,01130668  |
| A_33_P3424222  | 3119 HLA-DQB1    | ENST00000484729 | -0,703088053 | 11,37013058 | 0,078835923 |
| A_22_P00005863 | 2081 ERN1        | ENST00000433197 | -0,703369926 | 9,914530331 | 0,008360856 |
| A_23_P120710   | 7267 TTC3        | ENST00000355666 | -0,703928029 | 8,083882557 | 0,000247293 |
| A_32_P216548   | 26119 LDLRAP1    | ENST00000488127 | -0,704010341 | 8,759114273 | 0,002047722 |
| A_23_P50678    | 4145 MATK        | ENST00000612526 | -0,704091142 | 8,812674519 | 0,001147221 |
| A_23_P155417   | 84836 ABHD14B    | ENST00000361143 | -0,705087249 | 8,393135479 | 6,66E-05    |
| A_23_P342131   | 220002 CYB561A3  | ENST00000540755 | -0,705599998 | 9,469246701 | 4,21E-05    |
| A_24_P194081   | 53827 FXYD5      | ENST00000496493 | -0,705789004 | 11,35808447 | 0,000472212 |
| A_23_P109636   | 26018 LRIG1      | ENST00000496559 | -0,706663051 | 8,626943631 | 0,00041343  |
| A_23_P215956   | 4609 MYC         | ENST00000613283 | -0,706777322 | 9,294991684 | 0,006141398 |
| A_23_P91390    | 7056 THBD        | ENST00000377103 | -0,707661772 | 10,25830901 | 0,026793084 |
| A_23_P85952    | 79961 DENND2D    | ENST00000357640 | -0,710078003 | 11,97563353 | 0,012018056 |
| A_23_P120710   | 7267 TTC3        | ENST00000355666 | -0,710682046 | 8,097020455 | 0,000232284 |
| A_23_P100654   | 57659 ZBTB4      | ENST00000311403 | -0,713044826 | 9,040032053 | 0,002188911 |
| A_23_P91764    | 115650 TNFRSF13C | ENST00000291232 | -0,713672448 | 7,46077375  | 0,00266058  |
| A_23_P215956   | 4609 MYC         | ENST00000613283 | -0,714157765 | 9,303670541 | 0,005846826 |
| A_32_P24581    | 6233 RPS27A      | ENST00000443181 | -0,715366825 | 13,17855308 | 0,00642976  |

|                |                     |                 |              |             |             |
|----------------|---------------------|-----------------|--------------|-------------|-------------|
| A_23_P163567   | 55512 SMPD3         | ENST00000219334 | -0,719488804 | 8,707095502 | 0,079543899 |
| A_23_P215956   | 4609 MYC            | ENST00000613283 | -0,720087513 | 9,352094135 | 0,005784716 |
| A_33_P3592015  | 22927 HABP4         | ENST00000466976 | -0,721303684 | 8,432139512 | 0,00337024  |
| A_33_P3217347  | 64219 PJA1          | ENST00000374571 | -0,722990366 | 8,919384576 | 0,003583357 |
| A_23_P145074   | 10957 PNRC1         | ENST00000336032 | -0,723091144 | 12,68116061 | 0,000338495 |
| A_32_P225604   | 6125 RPL5           | ENST00000426545 | -0,723361725 | 13,73492322 | 0,015595029 |
| A_23_P35205    | 11123 RCAN3         | ENST00000374395 | -0,72385073  | 8,412052689 | 0,001770683 |
| A_24_P153043   | 118433 RPL23AP7     | ENST00000450734 | -0,723987564 | 14,18798763 | 0,000326018 |
| A_33_P3382560  | 6147 RPL23A         | ENST00000479658 | -0,724039658 | 14,39181224 | 0,001264872 |
| A_23_P19510    | 3120 HLA-DQB2       | ENST00000416131 | -0,724291203 | 8,951384142 | 0,027581915 |
| A_23_P69431    | 6124 RPL4           | ENST00000564647 | -0,724616246 | 13,57720537 | 0,002074862 |
| A_33_P3259393  | 145864 HAPLN3       | ENST00000558770 | -0,725102102 | 10,78921852 | 0,022745084 |
| A_33_P3589217  | 293 SLC25A6         | ENST00000484026 | -0,725803684 | 11,50462033 | 0,000403025 |
| A_33_P3404775  | 8761 PABPC4         | ENST00000468476 | -0,726804021 | 10,67209396 | 0,000316806 |
| A_23_P202269   | 288 ANK3            | ENST00000280772 | -0,727599156 | 7,358904494 | 0,002473105 |
| A_33_P3387272  | 1915 EEF1A1         | ENST00000455918 | -0,727685337 | 12,34415024 | 0,009502821 |
| A_23_P70095    | 972 CD74            | ENST00000523813 | -0,728227933 | 10,34191541 | 0,017649378 |
| A_24_P218006   | 84277 DNAJC30       | ENST00000395176 | -0,728845696 | 8,353046863 | 4,67E-05    |
| A_23_P166536   | 23774 BRD1          | ENST00000457780 | -0,729434053 | 9,28277584  | 0,001485321 |
| A_21_P0000336  | 677833 SNORA54      | NA              | -0,731502651 | 9,856121413 | 0,097144982 |
| A_23_P16722    | 55619 DOCK10        | ENST00000409592 | -0,731880028 | 9,296460702 | 0,003383311 |
| A_23_P371787   | 9766 SUSD6          | ENST00000342745 | -0,733466371 | 12,05294054 | 0,001449575 |
| A_33_P3306068  | 4610 MYCL           | NA              | -0,734338858 | 9,285896574 | 0,022743886 |
| A_22_P00000985 | 439949 PRKCQ-AS1    | ENST00000455810 | -0,73558438  | 9,674714307 | 0,014542199 |
| A_23_P100654   | 57659 ZBTB4         | ENST00000311403 | -0,736767063 | 9,123996766 | 0,002671273 |
| A_23_P41716    | 10399 GNB2L1        | ENST00000508963 | -0,73709929  | 13,41893913 | 0,0004511   |
| A_33_P3420204  | 23373 CRTC1         | ENST00000338797 | -0,737119661 | 9,608580816 | 0,000779643 |
| A_23_P204929   | 11215 AKAP11        | ENST00000025301 | -0,737229671 | 8,646263494 | 0,000396564 |
| A_33_P3269723  | 125150 ZSWIM7       | ENST00000497434 | -0,737358272 | 8,695280686 | 0,003076392 |
| A_23_P404494   | 3575 IL7R           | ENST00000303115 | -0,737603826 | 13,2091226  | 0,069138375 |
| A_33_P3378665  | 123036 TC2N         | ENST00000340892 | -0,738672291 | 7,666264415 | 0,001252098 |
| A_23_P14804    | 10099 TSPAN3        | ENST00000560715 | -0,739002759 | 8,679080972 | 0,000472212 |
| A_23_P71867    | 3590 IL11RA         | ENST00000602473 | -0,739019659 | 8,263968381 | 0,00129207  |
| A_24_P269814   | 59338 PLEKHA1       | ENST00000368988 | -0,739152112 | 7,970424516 | 0,005782313 |
| A_23_P215956   | 4609 MYC            | ENST00000613283 | -0,740868298 | 9,495657246 | 0,005541963 |
| A_24_P678104   | 50861 STMN3         | ENST00000370053 | -0,74111257  | 8,034436193 | 0,000151164 |
| A_23_P30736    | 3112 HLA-DOB        | ENST00000426644 | -0,741114637 | 8,834432731 | 0,003980394 |
| A_33_P3379916  | 2744 GLS            | ENST00000320717 | -0,741156417 | 8,015473679 | 0,000176618 |
| A_23_P122906   | 26053 AUTS2         | ENST00000611706 | -0,742177924 | 8,325368266 | 0,035745238 |
| A_23_P64898    | 10219 KLRG1         | ENST00000538029 | -0,74281823  | 10,91843311 | 0,064777761 |
| A_23_P213592   | 22838 RNF44         | ENST00000274811 | -0,74343648  | 10,54373662 | 0,000170109 |
| A_33_P3280950  | 144571 A2M-AS1      | NA              | -0,744824417 | 10,55465918 | 0,02067863  |
| A_32_P44316    | 1915 EEF1A1         | ENST00000443590 | -0,745075225 | 12,36706603 | 0,00562278  |
| A_33_P3240538  | 51175 TUBE1         | ENST00000368662 | -0,748388711 | 7,262287875 | 0,000475296 |
| A_33_P3259148  | 729288 ZNF286B      | ENST00000421016 | -0,748863302 | 7,548938559 | 0,000221766 |
| A_23_P82929    | 4856 NOV            | ENST00000259526 | -0,748910533 | 8,347733816 | 0,074708063 |
| A_23_P122906   | 26053 AUTS2         | ENST00000611706 | -0,749849353 | 8,182616056 | 0,027437381 |
| A_23_P201596   | 271 AMPD2           | ENST00000528958 | -0,750171311 | 9,686464081 | 0,000172439 |
| A_24_P288836   | 3116 HLA-DPB2       | ENST00000461425 | -0,751948706 | 9,953846852 | 0,004206908 |
| A_23_P251593   | 4736 RPL10A         | ENST00000472730 | -0,752535919 | 15,26878708 | 0,006221995 |
| A_32_P195401   | 150864 FAM117B      | ENST00000392238 | -0,754693507 | 9,24117077  | 0,001685274 |
| A_23_P109636   | 26018 LRIG1         | ENST00000496559 | -0,755636295 | 8,696581982 | 0,000172214 |
| A_32_P146659   | 401431 ATP6V0E2-AS1 | NA              | -0,756949452 | 7,066062968 | 0,000240995 |

|                |                      |                 |              |             |             |
|----------------|----------------------|-----------------|--------------|-------------|-------------|
| A_23_P11070    | 84636 GPR174         | ENST00000276077 | -0,758448007 | 7,289931586 | 0,000160586 |
| A_23_P122906   | 26053 AUTS2          | ENST00000611706 | -0,758673025 | 8,314693362 | 0,034824301 |
| A_33_P3336113  | 220359 TIGD3         | ENST00000309880 | -0,760493108 | 8,033457592 | 0,00568151  |
| A_23_P218058   | 8302 KLRC4           | ENST00000309384 | -0,761547948 | 8,55622751  | 0,02760154  |
| A_23_P200710   | 5287 PIK3C2B         | ENST00000424712 | -0,761628158 | 9,084144067 | 0,001952984 |
| A_21_P0000792  | 100506779 BZRAP1-AS1 | NA              | -0,762048486 | 9,419616053 | 0,000214097 |
| A_23_P354827   | 162972 ZNF550        | ENST00000325134 | -0,762846708 | 7,160917002 | 0,00078859  |
| A_23_P132515   | 54847 SIDT1          | ENST00000264852 | -0,76293706  | 8,103925538 | 0,000491369 |
| A_23_P418031   | 126917 IFFO2         | ENST00000455833 | -0,763026209 | 9,63079064  | 0,003980394 |
| A_23_P24586    | 84680 ACCS           | ENST00000263776 | -0,763117256 | 8,134217035 | 0,008243891 |
| A_23_P109636   | 26018 LRIG1          | ENST00000496559 | -0,764305258 | 8,735641517 | 0,000229335 |
| A_33_P3277714  | 60468 BACH2          | NA              | -0,765769531 | 8,37546677  | 0,020213326 |
| A_23_P410613   | 90488 TMEM263        | ENST00000280756 | -0,766360661 | 8,182745108 | 0,012918195 |
| A_23_P68942    | 6122 RPL3            | ENST00000481985 | -0,766753046 | 14,95103672 | 0,009796096 |
| A_33_P3301620  | 140545 RNF32         | ENST00000469382 | -0,767259099 | 10,02278125 | 0,005612446 |
| A_21_P0000222  | 94161 SNORD46        | NA              | -0,768649516 | 8,023220962 | 0,032456651 |
| A_23_P258769   | 3115 HLA-DPB1        | ENST00000399500 | -0,769265586 | 13,78223587 | 0,091807752 |
| A_33_P3386671  | 6097 RORC            | ENST00000356728 | -0,770208371 | 7,534333012 | 0,004546531 |
| A_23_P153676   | 7089 TLE2            | ENST00000443826 | -0,770494546 | 7,384160474 | 0,00114606  |
| A_23_P125519   | 6191 RPS4X           | ENST00000486733 | -0,770839716 | 14,77084908 | 0,009333282 |
| A_23_P100730   | 8631 SKAP1           | ENST00000579476 | -0,770968289 | 11,30243039 | 0,014071709 |
| A_23_P140427   | 51466 EVL            | ENST00000554045 | -0,771200441 | 12,65953157 | 0,01912475  |
| A_23_P215956   | 4609 MYC             | ENST00000613283 | -0,771561448 | 9,516476305 | 0,004741475 |
| A_23_P13425    | 975 CD81             | ENST00000468153 | -0,772844744 | 11,28232341 | 0,005539887 |
| A_23_P250735   | 23492 CBX7           | ENST00000216133 | -0,77337281  | 11,72361523 | 0,000411372 |
| A_33_P3226995  | 924 CD7              | ENST00000312648 | -0,773739926 | 9,245128397 | 0,005459398 |
| A_23_P55682    | 65982 ZSCAN18        | ENST00000596372 | -0,774280872 | 8,617799109 | 0,00999243  |
| A_33_P3297245  | 22800 RRAS2          | NA              | -0,774706779 | 8,017296548 | 0,001792109 |
| A_23_P37375    | 9252 RPS6KA5         | ENST00000261991 | -0,776940663 | 10,11812502 | 0,000389791 |
| A_33_P3346826  | 9235 IL32            | ENST00000528652 | -0,777508866 | 10,74022466 | 0,007442801 |
| A_23_P126844   | 8718 TNFRSF25        | ENST00000513135 | -0,777975725 | 11,90711207 | 0,031886151 |
| A_32_P47701    | 1915 EEF1A1          | ENST00000488500 | -0,779798645 | 12,04863122 | 0,019615847 |
| A_24_P218970   | 1975 EIF4B           | ENST00000262056 | -0,78021903  | 8,057310242 | 2,32E-05    |
| A_23_P104641   | 738 VPS51            | ENST00000534591 | -0,780624941 | 11,6212569  | 1,45E-05    |
| A_24_P261734   | 81539 SLC38A1        | ENST00000398637 | -0,781135246 | 9,379775288 | 0,005466328 |
| A_23_P121657   | 9957 HS3ST1          | ENST00000002596 | -0,785054783 | 6,847030549 | 4,45E-05    |
| A_23_P91095    | 940 CD28             | ENST00000374481 | -0,78550453  | 7,709417694 | 0,001503076 |
| A_23_P161076   | 914 CD2              | ENST00000369478 | -0,785945937 | 12,76808673 | 0,020849557 |
| A_23_P142776   | 8665 EIF3F           | ENST00000434851 | -0,785964385 | 10,5741539  | 0,000192854 |
| A_33_P3295786  | 348378 FAM159A       | ENST00000517870 | -0,786090386 | 9,385099911 | 0,000950063 |
| A_32_P206479   | 128611 ZNF831        | ENST00000371030 | -0,787619501 | 8,567982751 | 0,004205603 |
| A_33_P3421626  | 57189 KIAA1147       | ENST00000536163 | -0,787795784 | 8,446249849 | 0,000667768 |
| A_23_P125078   | 284129 SLC26A11      | ENST00000411502 | -0,788866222 | 9,890384335 | 0,00207799  |
| A_33_P3248992  | 36 ACADSB            | ENST00000358776 | -0,790881097 | 7,888437685 | 0,001600415 |
| A_23_P351148   | 117157 SH2D1B        | ENST00000367929 | -0,792645088 | 8,824797518 | 0,050198872 |
| A_33_P3210965  | 79600 TCTN1          | ENST00000460357 | -0,792692393 | 7,823136922 | 4,48E-05    |
| A_23_P58132    | 399 RHOH             | ENST00000610353 | -0,793286659 | 10,07702219 | 0,002373839 |
| A_23_P98350    | 330 BIRC3            | ENST00000263464 | -0,793656842 | 9,882317454 | 0,002150008 |
| A_22_P00007720 | 3119 HLA-DQB1        | ENST00000460185 | -0,794453048 | 12,09185233 | 0,051371709 |
| A_33_P3271635  | 3115 HLA-DPB1        | ENST00000402095 | -0,795292713 | 11,0913275  | 0,016077057 |
| A_32_P353072   | 54664 TMEM106B       | ENST00000396667 | -0,795332386 | 7,924944243 | 0,002006756 |
| A_23_P208850   | 6217 RPS16           | ENST00000601390 | -0,796660641 | 14,83505173 | 0,001718435 |
| A_24_P298360   | 4054 LTBP3           | ENST00000528516 | -0,797495138 | 7,792267431 | 0,000350396 |

|                |                     |                 |              |             |             |
|----------------|---------------------|-----------------|--------------|-------------|-------------|
| A_23_P324490   | 9710 KIAA0355       | ENST00000299505 | -0,798106837 | 8,76980943  | 0,000234438 |
| A_33_P3271651  | 3115 HLA-DPB1       | ENST00000471170 | -0,798558966 | 12,14063536 | 0,014125963 |
| A_21_P0000463  | 100113382 SNORD105B | NA              | -0,798902594 | 10,29642016 | 0,007834267 |
| A_24_P14731    | 27344 PCSK1N        | ENST00000218230 | -0,799917736 | 12,07563834 | 0,00467174  |
| A_23_P203115   | 84866 TMEM25        | ENST00000533627 | -0,802516234 | 7,559687242 | 0,000753296 |
| A_23_P51231    | 864 RUNX3           | ENST00000308873 | -0,802986668 | 10,86791693 | 0,017519316 |
| A_22_P00012003 | 5335 PLCG1          | ENST00000423733 | -0,804167939 | 9,286725031 | 5,53E-05    |
| A_33_P3464555  | 57118 CAMK1D        | ENST00000619168 | -0,80568734  | 10,72867564 | 0,000155335 |
| A_24_P67699    | 6147 RPL23A         | ENST00000446445 | -0,807050706 | 16,03326824 | 0,00180687  |
| A_33_P3248794  | 4665 NAB2           | ENST00000342556 | -0,808480077 | 9,000400503 | 0,000247189 |
| A_33_P3239587  | 439921 MXRA7        | ENST00000375036 | -0,80903513  | 10,16986625 | 0,066947039 |
| A_23_P310931   | 1269 CNR2           | ENST00000374472 | -0,810126521 | 7,696231425 | 7,00E-05    |
| A_24_P299911   | 23178 PASK          | ENST00000358649 | -0,813633604 | 7,893977628 | 0,003277501 |
| A_23_P36888    | 91523 PCED1B        | ENST00000546455 | -0,815016082 | 10,97512899 | 0,00456788  |
| A_24_P324674   | 4063 LY9            | ENST00000392203 | -0,815253038 | 8,509826426 | 0,000247973 |
| A_32_P232559   | 439949 PRKCQ-AS1    | ENST00000449648 | -0,815879349 | 10,24867214 | 0,009851585 |
| A_33_P3883985  | 64788 LMF1          | ENST00000565467 | -0,815917565 | 8,047140765 | 0,01906055  |
| A_23_P109143   | 5621 PRNP           | ENST00000379440 | -0,816531282 | 9,45248827  | 0,010762109 |
| A_23_P215956   | 4609 MYC            | ENST00000613283 | -0,817904532 | 9,417572353 | 0,002772123 |
| A_23_P34676    | 919 CD247           | ENST00000483825 | -0,818813267 | 11,26304949 | 0,023670827 |
| A_33_P3341616  | 387751 GVINP1       | ENST00000531871 | -0,818816185 | 9,147683339 | 0,000140499 |
| A_33_P3393694  | 29997 GLTSCR2       | ENST00000598681 | -0,818858882 | 14,1358002  | 0,006406744 |
| A_23_P165061   | 166 AES             | ENST00000592414 | -0,820274176 | 12,44509214 | 0,004383618 |
| A_23_P215956   | 4609 MYC            | ENST00000613283 | -0,822520509 | 9,282807253 | 0,003054708 |
| A_24_P169234   | 7535 ZAP70          | ENST00000451498 | -0,822657426 | 9,788280207 | 0,0124505   |
| A_23_P357881   | 926 CD8B            | ENST00000416057 | -0,825759811 | 8,064711415 | 0,006804764 |
| A_33_P3417626  | 375704 ENHO         | ENST00000399775 | -0,826174114 | 7,196757387 | 7,09E-05    |
| A_23_P29747    | 6147 RPL23A         | ENST00000580755 | -0,826212883 | 16,13859655 | 0,00162031  |
| A_21_P0014671  | 6207 RPS13          | ENST00000525828 | -0,830966698 | 14,52025233 | 0,000470565 |
| A_23_P215956   | 4609 MYC            | ENST00000613283 | -0,832867752 | 9,306580405 | 0,002224839 |
| A_23_P404481   | 1901 S1PR1          | ENST00000305352 | -0,832892863 | 9,493411789 | 0,002689002 |
| A_33_P3360341  | 2625 GATA3          | ENST00000379328 | -0,83513045  | 7,818067565 | 0,000541076 |
| A_23_P12140    | 6125 RPL5           | ENST00000461952 | -0,83603802  | 10,8635949  | 0,00485204  |
| A_24_P166443   | 3115 HLA-DPB1       | ENST00000402095 | -0,837986655 | 12,74338219 | 0,008237385 |
| A_23_P39131    | 29997 GLTSCR2       | ENST00000599582 | -0,839377661 | 10,82991086 | 0,000997645 |
| A_33_P3234546  | 926 CD8B            | ENST00000390655 | -0,839433807 | 10,06965098 | 0,03941422  |
| A_23_P255896   | 129293 TRABD2A      | ENST00000335459 | -0,840201114 | 7,679434664 | 0,00353966  |
| A_23_P6413     | 140606 SELM         | ENST00000490967 | -0,842006275 | 7,819886988 | 0,000401718 |
| A_23_P89062    | 100132341 CLUHP3    | ENST00000254109 | -0,843498974 | 8,546726063 | 0,001348315 |
| A_33_P3298990  | 921 CD5             | ENST00000347785 | -0,845480678 | 10,77486703 | 0,026728133 |
| A_24_P849801   | 6146 RPL22          | ENST00000234875 | -0,845494883 | 9,119884945 | 0,000350396 |
| A_23_P209055   | 933 CD22            | ENST00000594250 | -0,848138755 | 7,366618025 | 0,001259034 |
| A_24_P208345   | 85414 SLC45A3       | ENST00000367145 | -0,848678224 | 7,82665438  | 0,011545651 |
| A_23_P124642   | 10125 RASGRP1       | ENST00000539159 | -0,849419103 | 10,13010655 | 0,006347449 |
| A_21_P0000252  | 606500 SNORD68      | ENST00000487034 | -0,850544877 | 9,33604767  | 0,001541841 |
| A_24_P388528   | 6480 ST6GAL1        | ENST00000470633 | -0,850884531 | 11,26984846 | 0,003272118 |
| A_23_P76078    | 51561 IL23A         | ENST00000228534 | -0,85789349  | 7,791712531 | 0,00455608  |
| A_23_P30634    | 60468 BACH2         | ENST00000257749 | -0,858303965 | 7,320451909 | 0,000278746 |
| A_19_P00812587 | 6125 RPL5           | ENST00000406671 | -0,859330756 | 11,93529506 | 0,00390955  |
| A_23_P151166   | 84329 HVCN1         | ENST00000356742 | -0,860559298 | 10,22750159 | 1,76E-05    |
| A_33_P3223056  | 81794 ADAMTS10      | ENST00000270328 | -0,861218921 | 8,110231201 | 0,006804764 |
| A_23_P21485    | 55022 PID1          | ENST00000392055 | -0,862799646 | 7,939095362 | 0,001382745 |
| A_23_P207201   | 974 CD79B           | ENST00000349817 | -0,86831125  | 8,701454342 | 0,001956278 |

|                |                    |                 |              |             |             |
|----------------|--------------------|-----------------|--------------|-------------|-------------|
| A_33_P3285734  | 343413 FCRL6       | ENST00000392235 | -0,868432454 | 7,744015005 | 0,011421198 |
| A_23_P406385   | 146330 FBXL16      | ENST00000324361 | -0,870017025 | 9,02957029  | 0,00897071  |
| A_23_P311875   | 923 CD6            | ENST00000344931 | -0,871261539 | 11,40076433 | 0,015210621 |
| A_24_P808522   | 6208 RPS14         | ENST00000401695 | -0,871972897 | 12,38451727 | 0,00133251  |
| A_23_P215956   | 4609 MYC           | ENST00000613283 | -0,874722687 | 9,463625284 | 0,001650009 |
| A_33_P3363933  | 343413 FCRL6       | ENST00000321935 | -0,874844625 | 9,567829824 | 0,027615969 |
| A_23_P44155    | 10225 CD96         | ENST00000283285 | -0,875360582 | 9,138346118 | 0,001794881 |
| A_33_P3399064  | 100008587 RNA5-8S5 | NA              | -0,876115798 | 14,51454384 | 0,00484269  |
| A_23_P501849   | 6137 RPL13         | ENST00000562879 | -0,876288555 | 13,16083704 | 0,001146714 |
| A_33_P3335124  | 6187 RPS2          | ENST00000468126 | -0,879429401 | 14,05546678 | 0,000158411 |
| A_23_P416747   | 916 CD3E           | ENST00000531913 | -0,880975135 | 8,954782299 | 0,00114606  |
| A_23_P159335   | 926 CD8B           | ENST00000390655 | -0,883565987 | 11,37970341 | 0,036202977 |
| A_23_P156218   | 3003 GZMK          | ENST00000231009 | -0,886469216 | 9,775402042 | 0,061017544 |
| A_33_P3250671  | 6932 TCF7          | ENST00000522561 | -0,888071219 | 8,259414174 | 0,004692523 |
| A_23_P253200   | 6138 RPL15         | ENST00000413699 | -0,892379659 | 10,36066193 | 0,000195013 |
| A_23_P53763    | 80183 KIAA0226L    | ENST00000441284 | -0,892865682 | 8,870699602 | 0,0006601   |
| A_32_P182941   | 6188 RPS3          | ENST00000407940 | -0,893290309 | 12,38800991 | 0,000472212 |
| A_33_P3411296  | 5813 PURA          | ENST00000331327 | -0,894325107 | 9,801670151 | 0,000442573 |
| A_33_P3259135  | 27065 NSG1         | ENST00000621129 | -0,89654973  | 7,589756433 | 0,010427851 |
| A_33_P3368334  | 115352 FCRL3       | ENST00000480682 | -0,902703169 | 9,204611553 | 0,006450051 |
| A_24_P766208   | 6122 RPL3          | ENST00000417615 | -0,903643931 | 14,48492126 | 0,002490665 |
| A_23_P215956   | 4609 MYC           | ENST00000613283 | -0,904906881 | 9,655129571 | 0,001039611 |
| A_24_P203000   | 3560 IL2RB         | ENST00000216223 | -0,906884815 | 10,96813277 | 0,012041014 |
| A_23_P120227   | 81606 LBH          | ENST00000395323 | -0,914945447 | 10,16083166 | 0,001092547 |
| A_23_P133543   | 26249 KLHL3        | ENST00000309755 | -0,917918848 | 7,532647527 | 0,000140993 |
| A_23_P340019   | 197358 NLRC3       | ENST00000615877 | -0,922080722 | 10,62503267 | 0,002577057 |
| A_24_P22079    | 2308 FOXO1         | ENST00000379561 | -0,927068289 | 8,579804626 | 3,32E-05    |
| A_23_P103361   | 3932 LCK           | ENST00000469765 | -0,927427269 | 11,47142497 | 0,002773045 |
| A_32_P62008    | 4736 RPL10A        | ENST00000472730 | -0,930559006 | 14,27722343 | 0,000843416 |
| A_24_P87763    | 1938 EEF2          | ENST00000309311 | -0,931981107 | 12,85209687 | 9,98E-06    |
| A_22_P00020127 | 100506776 TRG-AS1  | NA              | -0,933962169 | 8,385396697 | 0,000803986 |
| A_23_P3911     | 57125 PLXDC1       | ENST00000461225 | -0,936337175 | 7,56684572  | 0,00370158  |
| A_33_P3334515  | 57447 NDRG2        | ENST00000556147 | -0,937202656 | 9,419245267 | 7,09E-05    |
| A_33_P3251462  | 128653 C20orf141   | ENST00000603872 | -0,937740916 | 11,45068787 | 0,000680631 |
| A_24_P56270    | 8445 DYRK2         | ENST00000344096 | -0,937872761 | 8,349579149 | 0,000307167 |
| A_23_P250302   | 1232 CCR3          | ENST00000357422 | -0,93873964  | 9,082990307 | 0,00553533  |
| A_24_P136182   | 256355 RPS2P32     | ENST00000423464 | -0,942198127 | 14,06021444 | 3,56E-05    |
| A_33_P3281985  | 1380 CR2           | ENST00000367057 | -0,94305827  | 7,093350004 | 9,46E-05    |
| A_23_P107283   | 3212 HOXB2         | ENST00000330070 | -0,943491369 | 8,721131677 | 0,00033109  |
| A_24_P319374   | 10223 GPA33        | ENST00000367868 | -0,947475324 | 7,964758515 | 0,000774949 |
| A_23_P202520   | 3983 ABLIM1        | ENST00000369252 | -0,950138503 | 11,34844302 | 0,004626524 |
| A_23_P43157    | 4603 MYBL1         | ENST00000522677 | -0,954280114 | 8,859069104 | 0,009496169 |
| A_23_P354151   | 3702 ITK           | ENST00000519402 | -0,954989031 | 8,856860338 | 0,001004217 |
| A_23_P96590    | 9737 GPRASP1       | ENST00000537097 | -0,957512785 | 7,478721531 | 0,000285987 |
| A_33_P3364741  | 9902 MRC2          | ENST00000583597 | -0,957800937 | 10,28029803 | 0,061003559 |
| A_23_P201731   | 7188 TRAF5         | ENST00000336184 | -0,957844053 | 9,102619396 | 0,000891954 |
| A_23_P17134    | 4118 MAL           | ENST00000353004 | -0,959996409 | 11,57317789 | 0,012309099 |
| A_23_P114057   | 54910 SEMA4C       | ENST00000467747 | -0,96213616  | 9,599677562 | 0,001895923 |
| A_23_P50137    | 51320 MEX3C        | ENST00000616921 | -0,965699072 | 8,490600887 | 0,000733031 |
| A_32_P15320    | 1915 EEF1A1        | ENST00000415278 | -0,971163489 | 12,4016681  | 0,001993211 |
| A_33_P3214948  | 9806 SPOCK2        | ENST00000373109 | -0,975024504 | 12,58031571 | 0,009073773 |
| A_32_P128258   | 284367 SIGLEC17P   | ENST00000611992 | -0,977806004 | 8,097893674 | 0,0026746   |
| A_23_P99275    | 3820 KLRB1         | ENST00000229402 | -0,978814395 | 9,650996965 | 0,006357918 |



|                |                 |                 |              |             |             |
|----------------|-----------------|-----------------|--------------|-------------|-------------|
| A_32_P163247   | 925 CD8A        | ENST00000409511 | -0,980646522 | 11,18389153 | 0,01960273  |
| A_23_P114057   | 54910 SEMA4C    | ENST00000467747 | -0,98239378  | 9,680198925 | 0,001087039 |
| A_23_P114057   | 54910 SEMA4C    | ENST00000467747 | -0,98841287  | 9,649672209 | 0,001278392 |
| A_33_P3383233  | 57447 NDRG2     | ENST00000397847 | -0,996482454 | 8,284813241 | 0,000120156 |
| A_23_P114057   | 54910 SEMA4C    | ENST00000467747 | -0,99666387  | 9,81542637  | 0,001649147 |
| A_32_P114284   | 22807 IKZF2     | ENST00000457361 | -0,999099045 | 8,153133807 | 0,001187413 |
| A_23_P350551   | 113246 C12orf57 | ENST00000229281 | -0,999828031 | 11,05117703 | 0,000499523 |
| A_23_P148047   | 5734 PTGER4     | ENST00000302472 | -1,000318997 | 9,68293561  | 0,000432028 |
| A_23_P205567   | 5583 PRKCH      | ENST00000556245 | -1,002626974 | 10,55745693 | 0,00220475  |
| A_23_P19673    | 6446 SGK1       | ENST00000367857 | -1,00465547  | 10,25055452 | 0,001156883 |
| A_24_P852756   | 3118 HLA-DQA2   | ENST00000546801 | -1,006548962 | 9,339791576 | 0,018325743 |
| A_23_P122906   | 26053 AUTS2     | ENST00000611706 | -1,008653268 | 8,397468662 | 0,042925576 |
| A_23_P8834     | 2053 EPHX2      | ENST00000521400 | -1,011446903 | 8,624111144 | 0,001770683 |
| A_23_P114057   | 54910 SEMA4C    | ENST00000467747 | -1,016130305 | 9,68656699  | 0,000856465 |
| A_24_P931443   | 8111 GPR68      | ENST00000535815 | -1,017199967 | 9,176788654 | 0,000983305 |
| A_23_P341325   | 140801 RPL10L   | ENST00000298283 | -1,021295736 | 13,48686737 | 7,00E-05    |
| A_23_P25566    | 1880 GPR183     | ENST00000376414 | -1,023573596 | 9,32539477  | 0,000211632 |
| A_23_P151805   | 10516 FBLN5     | ENST00000267620 | -1,025323533 | 7,78201354  | 0,000809842 |
| A_22_P00005343 | 3755 KCNG1      | ENST00000506387 | -1,025992315 | 7,450838163 | 0,001407737 |
| A_23_P114057   | 54910 SEMA4C    | ENST00000467747 | -1,029945425 | 9,946300163 | 0,001685274 |
| A_23_P114057   | 54910 SEMA4C    | ENST00000467747 | -1,033366962 | 9,879066301 | 0,001000736 |
| A_23_P114057   | 54910 SEMA4C    | ENST00000467747 | -1,039456913 | 9,703439004 | 0,00071919  |
| A_23_P114057   | 54910 SEMA4C    | ENST00000467747 | -1,043184843 | 9,975809624 | 0,001416506 |
| A_33_P3299254  | 29802 VPREB3    | ENST00000248948 | -1,046732438 | 9,728010549 | 0,000536937 |
| A_23_P113572   | 930 CD19        | ENST00000611258 | -1,076996763 | 10,2533699  | 0,013150027 |
| A_23_P103765   | 2205 FCER1A     | ENST00000368115 | -1,081595259 | 8,658570323 | 0,01065057  |
| A_23_P10232    | 55024 BANK1     | ENST00000322953 | -1,089354028 | 8,256313194 | 0,000124568 |
| A_23_P114057   | 54910 SEMA4C    | ENST00000467747 | -1,090058646 | 9,8972729   | 0,000663982 |
| A_33_P3379456  | 26751 SH3YL1    | ENST00000356150 | -1,094163437 | 8,391563196 | 0,001112112 |
| A_33_P3308332  | 58473 PLEKHB1   | ENST00000426191 | -1,098973652 | 9,142847412 | 0,001981221 |
| A_23_P501933   | 59285 CACNG6    | ENST00000352529 | -1,103540555 | 7,843928644 | 0,007333171 |
| A_23_P57521    | 51386 EIF3L     | ENST00000477256 | -1,110146261 | 10,78845145 | 4,61E-06    |
| A_33_P3257714  | 6228 RPS23      | ENST00000296674 | -1,117302694 | 9,189540691 | 0,000433797 |
| A_23_P205738   | 64919 BCL11B    | ENST00000345514 | -1,128271297 | 10,28901751 | 0,001357046 |
| A_23_P31725    | 640 BLK         | ENST00000526097 | -1,136734145 | 8,967310344 | 0,000541359 |
| A_33_P3406567  | 931 MS4A1       | ENST00000389939 | -1,139680266 | 8,068431912 | 0,000402089 |
| A_23_P46039    | 84824 FCRLA     | ENST00000236938 | -1,145994475 | 8,321023243 | 0,000472212 |
| A_23_P30900    | 3118 HLA-DQA2   | ENST00000552745 | -1,149059657 | 8,062641931 | 0,015905026 |
| A_23_P354805   | 11278 KLF12     | ENST00000377669 | -1,152960067 | 8,636998718 | 0,000663982 |
| A_23_P21495    | 8857 FCGBP      | ENST00000616721 | -1,155468022 | 7,656546883 | 0,000541634 |
| A_23_P343398   | 1236 CCR7       | ENST00000246657 | -1,168046984 | 13,21638612 | 0,010677809 |
| A_23_P250212   | 157285 SGK223   | ENST00000615670 | -1,169763531 | 10,24750871 | 0,001154636 |
| A_23_P39067    | 6689 SPIB       | ENST00000270632 | -1,174658793 | 9,166262551 | 9,62E-05    |
| A_33_P3250680  | 959 CD40LG      | ENST00000370629 | -1,177420557 | 9,829145393 | 0,001999416 |
| A_24_P252945   | 643 CXCR5       | ENST00000292174 | -1,191367579 | 8,513234174 | 0,000594114 |
| A_23_P103601   | 57134 MAN1C1    | ENST00000263979 | -1,19576748  | 9,72014326  | 0,001491149 |
| A_23_P138125   | 9214 FAIM3      | ENST00000463473 | -1,213670845 | 9,405700948 | 0,000170109 |
| A_23_P112531   | 399665 FAM102A  | ENST00000300434 | -1,215441319 | 12,06324016 | 0,002104441 |
| A_23_P112531   | 399665 FAM102A  | ENST00000300434 | -1,238295865 | 11,8175418  | 0,001847763 |
| A_23_P112531   | 399665 FAM102A  | ENST00000300434 | -1,240316899 | 11,81211915 | 0,001463552 |
| A_23_P112531   | 399665 FAM102A  | ENST00000300434 | -1,247274001 | 11,86591129 | 0,001572693 |
| A_23_P112531   | 399665 FAM102A  | ENST00000300434 | -1,253843474 | 11,79207384 | 0,001464166 |
| A_33_P3282556  | 79652 TMEM204   | ENST00000566264 | -1,260435926 | 9,372302497 | 7,95E-05    |

|               |                |                 |              |             |             |
|---------------|----------------|-----------------|--------------|-------------|-------------|
| A_23_P112531  | 399665 FAM102A | ENST00000300434 | -1,263772731 | 11,8359578  | 0,001586593 |
| A_23_P112531  | 399665 FAM102A | ENST00000300434 | -1,273653232 | 11,92425588 | 0,001463552 |
| A_23_P56703   | 129293 TRABD2A | ENST00000335459 | -1,285015048 | 9,639381213 | 0,000971585 |
| A_24_P20630   | 51176 LEF1     | ENST00000503879 | -1,288700564 | 11,50191655 | 0,002348953 |
| A_23_P112531  | 399665 FAM102A | ENST00000300434 | -1,301167037 | 11,98672275 | 0,001348315 |
| A_23_P112531  | 399665 FAM102A | ENST00000300434 | -1,316947418 | 11,82776765 | 0,001284241 |
| A_23_P357717  | 8115 TCL1A     | ENST00000556450 | -1,333121117 | 11,71961081 | 0,00973636  |
| A_23_P7582    | 6932 TCF7      | ENST00000522653 | -1,336371161 | 10,81610946 | 0,001382745 |
| A_33_P3401990 | 29802 VPREB3   | ENST00000248948 | -1,345807273 | 9,041895173 | 0,000959012 |
| A_33_P3391796 | 9241 NOG       | ENST00000332822 | -1,349874633 | 7,503387556 | 0,000424949 |
| A_23_P112531  | 399665 FAM102A | ENST00000300434 | -1,368408161 | 12,04645208 | 0,000774949 |
| A_32_P356316  | 3111 HLA-DOA   | ENST00000229829 | -1,374410755 | 10,46745065 | 3,82E-05    |
| A_23_P31376   | 54674 LRRN3    | ENST00000308478 | -1,506684256 | 8,334942905 | 0,000439324 |
| A_23_P10025   | 4753 NELL2     | ENST00000437801 | -1,523887021 | 8,592980206 | 6,59E-05    |
| A_33_P3367396 | 400823 FAM177B | ENST00000360827 | -1,567812324 | 10,09029715 | 0,009852505 |
