# Supplementary material for: Of mice and men: the host response to influenza virus infection
Source: PubMed Central journal article supplement (PMC6132725; doi:10.1007/s00335-018-9750-y), 2018-06-15
Supplement: 335_2018_9750_MOESM11_ESM.pdf [file 335_2018_9750_MOESM11_ESM.pdf]

| PROBE         | ACCNUM       | SYMBOL        | ENTREZID  | logFC       | AveExpr     | adj.P.Val   |
|---------------|--------------|---------------|-----------|-------------|-------------|-------------|
| A_55_P2017929 | NM_013492    | Clu           | 12759     | 3,25806899  | 13,14549462 | 1,08E-16    |
| A_55_P1961499 | NM_010741    | Ly6c1         | 17067     | 2,588938834 | 9,798752688 | 2,63E-13    |
| A_51_P426875  | NM_024228    | Gdpd3         | 68616     | 2,556396871 | 7,987806452 | 0,036455655 |
| A_51_P237752  | NM_008986    | Ptrf          | 19285     | 2,261526316 | 10,30196774 | 4,40E-08    |
| A_51_P103397  | NM_011708    | Vwf           | 22371     | 2,255598862 | 10,75293548 | 1,86E-09    |
| A_51_P343517  | NM_010742    | Ly6d          | 17068     | 2,216409673 | 8,777752688 | 5,79E-13    |
| A_52_P553890  | NM_016780    | Itgb3         | 16416     | 2,111751778 | 11,69263441 | 3,02E-10    |
| A_51_P254471  | NM_007465    | Birc2         | 11797     | 2,066019203 | 8,200139785 | 1,81E-14    |
| A_55_P2141938 | NR_027875    | 1810058I24Rik | 67705     | 2,005026316 | 7,560870968 | 0,000272932 |
| A_51_P105520  | NM_153057    | Nomo1         | 211548    | 1,974811522 | 9,93688172  | 3,47E-08    |
| A_55_P2008061 | NM_019923    | Itpr2         | 16439     | 1,912814367 | 9,683655914 | 8,47E-17    |
| A_55_P2068812 | AK203298     | Pkm           | 18746     | 1,910339972 | 12,00363441 | 4,72E-13    |
| A_55_P1963764 | NM_017461    | Sep O1        | 54204     | 1,837328592 | 11,01411828 | 0,088229093 |
| A_55_P2000107 | NM_009720    | Atox1         | 11927     | 1,833809388 | 12,34510753 | 1,83E-10    |
| A_55_P1983754 | NM_025557    | Pcp4l1        | 66425     | 1,814171408 | 10,59837634 | 0,001136868 |
| A_51_P453736  | NM_001143686 | Apol11b       | 328563    | 1,791680654 | 10,03232258 | 0,003477948 |
| A_55_P2064771 | NM_010741    | Ly6c1         | 17067     | 1,734475107 | 12,40869892 | 3,98E-07    |
| A_51_P151576  | NM_001001999 | Gp1bb         | 14724     | 1,706090327 | 9,984376344 | 3,34E-06    |
| A_55_P2121408 | NM_009416    | Tpm2          | 22004     | 1,679754623 | 7,804       | 6,13E-06    |
| A_52_P315976  | NM_009416    | Tpm2          | 22004     | 1,61664367  | 7,593677419 | 2,59E-05    |
| A_55_P2085295 | NM_198411    | Inf2          | 70435     | 1,603283784 | 9,953731183 | 3,29E-10    |
| A_66_P139618  | NM_001082545 | Stfa2         | 20862     | 1,591291607 | 9,333978495 | 0,00301006  |
| A_55_P2130178 | NM_010233    | Fn1           | 14268     | 1,585829303 | 8,488526882 | 5,07E-06    |
| A_55_P1966838 | NM_001037713 | Xaf1          | 327959    | 1,558310811 | 7,586946237 | 0,011039629 |
| A_51_P265495  | NM_010738    | Ly6a          | 110454    | 1,55499431  | 10,43309677 | 3,52E-06    |
| A_52_P398925  | NM_173869    | Stfa2l1       | 268885    | 1,542201991 | 9,132602151 | 0,004176047 |
| A_55_P1999102 | NM_023734    | Pi16          | 74116     | 1,541047653 | 9,039473118 | 0,00522067  |
| A_55_P2031436 | NM_001164036 | Ly6e          | 17069     | 1,538949502 | 11,78717204 | 5,94E-10    |
| A_55_P2001920 | NM_010227    | Flna          | 192176    | 1,528492888 | 12,19695699 | 6,39E-09    |
| A_52_P562676  | NM_013873    | Sult4a1       | 29859     | 1,502236131 | 8,355064516 | 0,000338826 |
| A_52_P459564  | NM_010575    | Itga2b        | 16399     | 1,496818634 | 10,17980645 | 8,26E-05    |
| A_51_P428372  | NM_023785    | Ppbp          | 57349     | 1,47183357  | 13,10597849 | 3,24E-07    |
| A_51_P279062  | NM_027763    | Trem1l1       | 71326     | 1,45528165  | 12,3243871  | 3,67E-05    |
| A_51_P153995  | NM_018762    | Gp9           | 54368     | 1,448406117 | 12,70202151 | 7,31E-06    |
| A_55_P1955308 | NM_001002898 | Sirpb1a       | 320832    | 1,444322902 | 10,17219355 | 4,98E-06    |
| A_55_P1986296 | NM_178598    | Tagln2        | 21346     | 1,442017781 | 13,72156989 | 6,98E-08    |
| A_51_P108226  | NM_183249    | Wfdc21        | 66107     | 1,439885491 | 7,763978495 | 0,000683692 |
| A_55_P2027278 | NM_144560    | Gas2l1        | 78926     | 1,432650782 | 11,75053763 | 1,53E-05    |
| A_55_P2019577 | NR_027818    | 1500011B03Rik | 66236     | 1,431461593 | 7,991591398 | 1,64E-09    |
| A_55_P1953459 | NM_001171147 | Yap1          | 22601     | 1,430955903 | 7,958978495 | 3,29E-10    |
| A_51_P359636  | NM_011150    | Lgals3bp      | 19039     | 1,427689189 | 11,08201075 | 1,12E-05    |
| A_51_P174961  | NM_007972    | F10           | 14058     | 1,426506401 | 8,668806452 | 7,10E-06    |
| A_55_P2211164 | AK017236     | 5330406M23Rik | 76671     | 1,424570413 | 8,073634409 | 5,86E-09    |
| A_55_P2016852 | NM_011777    | Zyx           | 22793     | 1,407481508 | 13,11324731 | 6,77E-06    |
| A_55_P2110758 | NM_177083    | B430306N03Rik | 320148    | 1,389206259 | 9,145021505 | 4,64E-07    |
| A_55_P2078735 | NR_015519    | AI662270      | 100043636 | 1,377008535 | 6,926       | 0,000469241 |
| A_55_P2076545 | NM_007976    | F5            | 14067     | 1,374726885 | 9,015763441 | 4,12E-07    |
| A_52_P661     | NM_175750    | Plxna4        | 243743    | 1,358972262 | 7,940806452 | 9,48E-06    |
| A_55_P2060107 | NM_011099    | Pkm           | 18746     | 1,347330725 | 10,01480645 | 0,000681054 |

|               |              |               |           |             |             |             |
|---------------|--------------|---------------|-----------|-------------|-------------|-------------|
| A_55_P2112737 | NM_007393    | Actb          | 11461     | 1,333655761 | 16,12345161 | 6,53E-07    |
| A_55_P1986531 | NM_001191012 | G6b           | 106722    | 1,331857752 | 8,982494624 | 0,000176281 |
| A_55_P2099650 | NM_053195    | Slc24a3       | 94249     | 1,316958748 | 9,323376344 | 4,07E-07    |
| A_55_P2083121 | NM_001164567 | Vill          | 22351     | 1,313324324 | 7,407010753 | 1,05E-05    |
| A_55_P2028600 | NM_022410    | Myh9          | 17886     | 1,310463016 | 11,99136559 | 4,35E-09    |
| A_55_P1991770 | NM_019417    | Pdlim4        | 30794     | 1,307874822 | 8,329043011 | 4,05E-11    |
| A_51_P507801  | NM_028784    | F13a1         | 74145     | 1,307526316 | 10,24087097 | 6,45E-07    |
| A_51_P286814  | NM_011424    | Ncor2         | 20602     | 1,306094595 | 8,863258065 | 9,59E-12    |
| A_55_P1956973 | NM_011602    | Tln1          | 21894     | 1,302980797 | 11,63656989 | 6,44E-06    |
| A_55_P2048607 | NM_017370    | Hp            | 15439     | 1,2776266   | 12,33929032 | 0,000309217 |
| A_52_P207335  | NM_025944    | Tmem246       | 67063     | 1,275022048 | 8,197849462 | 0,00021333  |
| A_51_P401907  | NM_001082547 | Gm5483        | 433016    | 1,272687055 | 8,288096774 | 0,01533845  |
| A_51_P407323  | NM_007976    | F5            | 14067     | 1,272445946 | 7,869483871 | 3,33E-06    |
| A_51_P133684  | NM_013808    | Csrp3         | 13009     | 1,265014225 | 6,806096774 | 0,047582519 |
| A_55_P2141395 | NM_023463    | Ly6g6c        | 68468     | 1,260059744 | 10,16783871 | 2,81E-06    |
| A_55_P2016049 | NM_001163014 | Gp6           | 243816    | 1,258966572 | 9,423021505 | 1,70E-06    |
| A_52_P472324  | NM_011414    | Sipi          | 20568     | 1,256113798 | 11,84569892 | 4,90E-05    |
| A_52_P487686  | NM_001082546 | BC100530      | 100034684 | 1,253741821 | 8,938548387 | 0,015778679 |
| A_55_P2007196 | NM_001177307 | Aldoa         | 11674     | 1,233351351 | 12,76237634 | 1,51E-12    |
| A_51_P359570  | NM_010501    | Ifit3         | 15959     | 1,232918919 | 9,949032258 | 0,006818352 |
| A_51_P364485  | NM_009396    | Tnfaip2       | 21928     | 1,22966074  | 8,789387097 | 9,40E-08    |
| A_52_P37894   | NM_009945    | Cox7a2        | 12866     | 1,222075391 | 10,48419355 | 1,46E-07    |
| A_55_P1998943 | NM_145211    | Oas1a         | 246730    | 1,222067568 | 10,91839785 | 0,002977832 |
| A_51_P427663  | NM_007725    | Cnn2          | 12798     | 1,21474111  | 10,86098925 | 8,71E-07    |
| A_55_P2212161 | AK009622     | 2310034005Rik | 69571     | 1,210560455 | 7,937978495 | 0,009195645 |
| A_55_P1963017 | NM_001082543 | Stfa1         | 20861     | 1,208726174 | 8,119150538 | 0,012728892 |
| A_55_P2171116 | NM_001145953 | Lgals3        | 16854     | 1,207271693 | 11,07767742 | 8,72E-05    |
| A_55_P2037697 | NM_001076679 | Gm9733        | 751864    | 1,203219772 | 7,840032258 | 1,51E-08    |
| A_55_P2004137 | NM_008138    | Gnai2         | 14678     | 1,201182077 | 12,31351613 | 3,98E-07    |
| A_51_P222657  | NM_009775    | Tspo          | 12257     | 1,196406117 | 10,67650538 | 3,05E-11    |
| A_51_P365019  | NM_010295    | Gclc          | 14629     | 1,195578947 | 7,225741935 | 2,04E-18    |
| A_51_P405476  | NM_010185    | Fcer1g        | 14127     | 1,192815789 | 12,74780645 | 3,41E-09    |
| A_52_P38639   | NM_153795    | Fermt3        | 108101    | 1,188711238 | 9,036172043 | 5,21E-06    |
| A_55_P2046145 | AK137448     | Gm10693       | 675749    | 1,180105263 | 9,859903226 | 5,20E-06    |
| A_55_P2152009 | NM_021344    | Tesc          | 57816     | 1,173654339 | 9,953086022 | 0,000285977 |
| A_51_P231320  | NM_008611    | Mmp8          | 17394     | 1,170416074 | 8,326193548 | 0,000246141 |
| A_51_P212754  | NM_009369    | Tgfbi         | 21810     | 1,164721195 | 10,61845161 | 0,000224136 |
| A_55_P2052769 | NM_001042743 | Mast2         | 17776     | 1,162691323 | 9,061731183 | 1,43E-05    |
| A_52_P467449  | NM_007440    | Alox12        | 11684     | 1,160876956 | 11,03665591 | 0,000183884 |
| A_55_P2066230 | NM_001172117 | Hck           | 15162     | 1,157972973 | 10,30739785 | 7,68E-07    |
| A_55_P2180869 | NM_029865    | Ocel1         | 77090     | 1,15205761  | 8,847322581 | 1,40E-06    |
| A_55_P1953301 | NM_146126    | Sord          | 20322     | 1,146901138 | 8,130430108 | 0,000443929 |
| A_55_P2008907 | NM_009609    | Actg1         | 11465     | 1,145926743 | 13,44660215 | 1,04E-06    |
| A_51_P225592  | NM_001001491 | Tpm4          | 326618    | 1,145105263 | 11,62805376 | 8,35E-06    |
| A_55_P2041075 | NM_001081636 | Ccnd3         | 12445     | 1,143669275 | 11,78927957 | 1,88E-06    |
| A_51_P176156  | NM_001173459 | LOC100038947  | 100038947 | 1,141766003 | 8,715344086 | 3,31E-06    |
| A_51_P341746  | NM_010823    | Mpl           | 17480     | 1,140880512 | 9,437376344 | 4,93E-05    |
| A_55_P2060630 | NM_027886    | Stk11ip       | 71728     | 1,140346373 | 7,412688172 | 0,023932291 |
| A_51_P357573  | NM_145575    | Cald1         | 109624    | 1,140004979 | 7,265784946 | 1,08E-06    |
| A_55_P2026233 | NM_023738    | Uba7          | 74153     | 1,131990754 | 11,48988172 | 4,69E-05    |

|               |              |               |        |             |             |             |
|---------------|--------------|---------------|--------|-------------|-------------|-------------|
| A_51_P173622  | NM_011202    | Ptpn11        | 19247  | 1,125578947 | 10,45004301 | 8,17E-06    |
| A_55_P2151685 | NM_011088    | Pira11        | 18724  | 1,122941679 | 9,527365591 | 1,27E-05    |
| A_55_P2000548 | NM_007687    | Cfl1          | 12631  | 1,119705548 | 12,50105376 | 1,27E-07    |
| A_66_P120380  | NM_177820    | Apol10b       | 328561 | 1,111499289 | 8,180892473 | 0,024713502 |
| A_55_P2139181 | NM_145575    | Cald1         | 109624 | 1,102348506 | 7,099032258 | 2,45E-06    |
| A_55_P2058757 | NM_007598    | Cap1          | 12331  | 1,09493101  | 10,5481828  | 4,27E-07    |
| A_55_P2071858 | NM_008598    | Mgmt          | 17314  | 1,094122333 | 7,55011828  | 3,06E-06    |
| A_51_P217336  | NM_029153    | Scamp1        | 107767 | 1,09162091  | 7,934075269 | 7,64E-06    |
| A_55_P2088385 | NM_011618    | Tnnt1         | 21955  | 1,08820697  | 8,266043011 | 1,57E-05    |
| A_55_P2015670 | NM_008397    | Itga6         | 16403  | 1,08497155  | 12,40425806 | 0,001331077 |
| A_55_P2021266 | NM_152803    | Hpse          | 15442  | 1,084862731 | 9,626645161 | 6,07E-06    |
| A_52_P633410  | NM_020590    | Gabarapl1     | 57436  | 1,081071124 | 11,61583871 | 6,37E-05    |
| A_52_P151853  | NM_001025262 | Tpd52         | 21985  | 1,080401849 | 8,241043011 | 3,80E-08    |
| A_55_P1990919 | NM_013759    | Msrb1         | 27361  | 1,070554054 | 13,61383871 | 0,000130497 |
| A_55_P2176492 | NM_023764    | Tollip        | 54473  | 1,06702276  | 7,823870968 | 0,039909903 |
| A_55_P2144526 | NM_001080381 | Fam65b        | 193385 | 1,066623755 | 9,402290323 | 1,08E-05    |
| A_66_P132493  | NM_031181    | Siglece       | 83382  | 1,058993599 | 12,06790323 | 0,028116916 |
| A_51_P482711  | NM_053272    | Dhcr24        | 74754  | 1,056836415 | 10,35587097 | 0,000149051 |
| A_52_P409769  | NM_194464    | Mrvi1         | 17540  | 1,053560455 | 8,898053763 | 0,000807548 |
| A_52_P425839  | NM_181596    | Retnlg        | 245195 | 1,051901138 | 12,01383871 | 0,005937941 |
| A_51_P198645  | NM_133167    | Parvb         | 170736 | 1,051433144 | 7,885150538 | 5,79E-05    |
| A_51_P294555  | NM_001033632 | Ifitm6        | 213002 | 1,051197724 | 9,718752688 | 9,45E-05    |
| A_55_P2007470 | NM_008808    | Pdgfa         | 18590  | 1,047019203 | 9,263322581 | 0,000197001 |
| A_51_P192800  | NM_008175    | Grn           | 14824  | 1,045738265 | 8,388408602 | 3,32E-06    |
| A_55_P1956457 | NM_029998    | 6030458C11Rik | 77877  | 1,039187055 | 7,287301075 | 0,000594345 |
| A_55_P1962010 | NM_019985    | Clec1b        | 56760  | 1,030564011 | 10,9573871  | 0,000166842 |
| A_55_P2000127 | NM_009365    | Tgfb1i1       | 21804  | 1,025220484 | 7,922924731 | 7,10E-06    |
| A_55_P2034928 | NM_001037925 | BC147527      | 625360 | 1,018542674 | 8,459032258 | 1,23E-05    |
| A_51_P279100  | NM_008969    | Ptgs1         | 19224  | 1,015215505 | 8,94927957  | 0,000510812 |
| A_55_P1962305 | NM_139198    | Plac8         | 231507 | 1,014470128 | 12,11310753 | 0,003376527 |
| A_55_P2056973 | NM_001033405 | Trem12        | 328833 | 1,013015647 | 9,005634409 | 1,27E-05    |
| A_55_P2017636 | NM_011580    | Thbs1         | 21825  | 1,010467994 | 9,744344086 | 0,004038794 |
| A_52_P239086  | NM_177744    | Apol10a       | 245282 | 1,006642959 | 7,871774194 | 0,010530057 |
| A_51_P441426  | NM_019932    | Pf4           | 56744  | 1,003448791 | 15,27054839 | 0,001164738 |
| A_55_P2086433 | NM_145209    | Oasl1         | 231655 | 0,99905761  | 9,998580645 | 0,009457159 |
| A_55_P1974577 | NM_028728    | Nfam1         | 74039  | 0,997490043 | 9,793333333 | 3,44E-05    |
| A_55_P2139385 | NR_002890    | Gm12070       | 654472 | 0,993852063 | 11,87833333 | 2,00E-07    |
| A_51_P346938  | NM_029796    | Lrg1          | 76905  | 0,991990043 | 10,27395699 | 0,030429804 |
| A_55_P2139473 | NM_001161724 | Ilk           | 16202  | 0,990842817 | 10,63609677 | 0,00022795  |
| A_55_P2012201 | NM_007471    | App           | 11820  | 0,987305121 | 7,858387097 | 3,47E-07    |
| A_55_P2125588 | NM_008808    | Pdgfa         | 18590  | 0,986184211 | 8,848021505 | 0,000240389 |
| A_55_P2030506 | NM_018739    | Rp9           | 55934  | 0,981226174 | 7,792129032 | 2,85E-09    |
| A_51_P240019  | NM_013755    | Gyg           | 27357  | 0,981133001 | 9,203107527 | 3,12E-06    |
| A_55_P2081488 | NM_009402    | Pglyrp1       | 21946  | 0,979995733 | 9,422623656 | 0,000229449 |
| A_55_P1955305 | NM_001002898 | Sirpb1a       | 320832 | 0,976093883 | 9,699150538 | 6,56E-05    |
| A_55_P1992910 | NM_013755    | Gyg           | 27357  | 0,974375533 | 9,170204301 | 6,40E-06    |
| A_55_P2079579 | NM_011094    | Pira7         | 18730  | 0,966284495 | 9,961397849 | 0,000225802 |
| A_51_P439996  | NM_008148    | Gp5           | 14729  | 0,964179943 | 8,752354839 | 0,001219212 |
| A_55_P2013948 | NM_146120    | Gsn           | 227753 | 0,963679943 | 10,81495699 | 0,000183354 |
| A_55_P2038007 | NM_007791    | Csrp1         | 13007  | 0,962647226 | 10,82692473 | 0,000345679 |

|               |              |               |           |             |             |             |
|---------------|--------------|---------------|-----------|-------------|-------------|-------------|
| A_51_P343252  | NM_009842    | Cd151         | 12476     | 0,961568279 | 10,23164516 | 0,000247234 |
| A_51_P308298  | NM_172118    | Myl9          | 98932     | 0,960263869 | 14,40034409 | 0,012568406 |
| A_55_P2033120 | NM_029688    | Srxn1         | 76650     | 0,958042674 | 10,20589247 | 0,000773949 |
| A_52_P370203  | NM_021878    | Jarid2        | 16468     | 0,953935277 | 8,268150538 | 8,60E-06    |
| A_66_P133328  | NM_001025261 | Tpd52         | 21985     | 0,953880512 | 9,492580645 | 3,15E-07    |
| A_51_P238448  | NM_007632    | Ccnd3         | 12445     | 0,953062589 | 9,919666667 | 1,10E-05    |
| A_51_P440047  | NM_173752    | Lgalsl        | 216551    | 0,951325036 | 8,491494624 | 0,003283242 |
| A_55_P2106956 | NR_004447    | Gm5523        | 433273    | 0,950639403 | 12,81258065 | 5,46E-06    |
| A_55_P1970597 | NM_009609    | Actg1         | 11465     | 0,949303698 | 14,74409677 | 0,000676365 |
| A_55_P2090209 | NM_022314    | Tpm3          | 59069     | 0,945953058 | 12,51595699 | 2,88E-05    |
| A_51_P154842  | NM_145153    | Oas1f         | 243262    | 0,945495733 | 10,01017204 | 0,008740493 |
| A_55_P1962084 | NM_013549    | Hist2h2aa1    | 15267     | 0,944366999 | 12,68001075 | 2,74E-05    |
| A_51_P423290  | NM_027613    | Mmrn1         | 70945     | 0,944331437 | 9,281666667 | 0,000250927 |
| A_51_P181517  | NM_144559    | Fcgr4         | 246256    | 0,944032717 | 8,880376344 | 0,000132084 |
| A_55_P2093994 | NM_030700    | Maged2        | 80884     | 0,94333357  | 9,097451613 | 0,002032335 |
| A_55_P2019113 | NM_001024848 | Apol7b        | 278679    | 0,941627312 | 7,342462366 | 6,56E-06    |
| A_51_P187082  | NM_008062    | G6pdx         | 14381     | 0,940219772 | 9,393763441 | 1,03E-06    |
| A_55_P1980831 | NM_029711    | Arpc2         | 76709     | 0,938767425 | 12,94587097 | 5,96E-05    |
| A_55_P2033041 | NM_001173460 | Sirpb1b       | 668101    | 0,937463016 | 10,08956989 | 0,000444355 |
| A_55_P2005853 | NM_001037098 | Nacc2         | 67991     | 0,935608108 | 7,764462366 | 2,38E-06    |
| A_52_P478256  | NM_178614    | Samm50        | 68653     | 0,933696302 | 7,821204301 | 0,014496713 |
| A_51_P358722  | NM_173414    | Lancl3        | 236285    | 0,931261024 | 7,03316129  | 0,000691472 |
| A_66_P113059  | NM_010578    | Itgb1         | 16412     | 0,931134424 | 8,437376344 | 6,80E-06    |
| A_55_P1985984 | NM_009609    | Actg1         | 11465     | 0,929603129 | 11,045      | 5,86E-05    |
| A_55_P1983523 | NM_145437    | Cd300ld       | 217305    | 0,929549075 | 8,778956989 | 0,010244186 |
| A_51_P235687  | NM_009663    | Alox5ap       | 11690     | 0,927453058 | 12,02923656 | 0,000239719 |
| A_51_P512992  | NM_178676    | Entpd3        | 215446    | 0,927400427 | 6,949247312 | 0,001691984 |
| A_55_P2064351 | NM_011703    | Vipr1         | 22354     | 0,925103841 | 7,863946237 | 6,07E-05    |
| A_55_P2035038 | XM_001473590 | Gm2437        | 100039816 | 0,921768137 | 10,76387097 | 0,001657933 |
| A_55_P2002846 | NM_001081365 | Cystm1        | 66060     | 0,917073969 | 7,374451613 | 0,049168823 |
| A_55_P2170225 | NM_172507    | Sh3bgrl2      | 212531    | 0,916835704 | 7,542946237 | 7,77E-08    |
| A_55_P2186027 | NM_008084    | Gapdh         | 14433     | 0,916306543 | 12,96194624 | 1,33E-05    |
| A_55_P2142830 | NM_013610    | Ninj1         | 18081     | 0,913916785 | 11,75462366 | 8,51E-05    |
| A_55_P2114993 | NM_009609    | Actg1         | 11465     | 0,913130156 | 14,47189247 | 0,000344283 |
| A_55_P1966843 | NR_002890    | Gm12070       | 654472    | 0,907832148 | 12,84315054 | 2,17E-05    |
| A_55_P1992617 | NM_019985    | Clec1b        | 56760     | 0,907573257 | 12,28836559 | 0,00074983  |
| A_55_P1962011 | NM_019985    | Clec1b        | 56760     | 0,905459459 | 12,57847312 | 0,000985409 |
| A_55_P2079560 | NM_011090    | Lilra6        | 18726     | 0,899981508 | 9,947430108 | 0,00034787  |
| A_52_P317393  | NM_018882    | Gpr56         | 14766     | 0,899016358 | 8,485451613 | 0,001007324 |
| A_55_P2116650 | NR_002860    | A130040M12Rik | 319269    | 0,898933855 | 10,48433333 | 0,00093836  |
| A_51_P413866  | NM_008198    | Cfb           | 14962     | 0,898559744 | 7,870193548 | 0,006426624 |
| A_66_P125862  | NR_015487    | A930005H10Rik | 68161     | 0,898117354 | 8,337473118 | 6,54E-06    |
| A_52_P559975  | NM_009909    | Cxcr2         | 12765     | 0,897326458 | 9,757580645 | 0,005337225 |
| A_55_P2051334 | NR_004446    | H2-K2         | 630499    | 0,8965633   | 12,84823656 | 0,006584566 |
| A_52_P126266  | NM_182997    | Prkab2        | 108097    | 0,896251067 | 7,951935484 | 7,68E-05    |
| A_52_P52618   | NM_007780    | Csf2rb        | 12983     | 0,89306899  | 9,284666667 | 0,000140712 |
| A_55_P2063251 | NM_028207    | Dusp3         | 72349     | 0,889395448 | 7,571322581 | 0,000295087 |
| A_55_P1970700 | NM_011029    | Rpsa          | 16785     | 0,887785917 | 14,23398925 | 0,008723999 |
| A_51_P144868  | NM_029934    | Mboat7        | 77582     | 0,885966572 | 8,735225806 | 6,08E-07    |
| A_51_P109449  | NM_008519    | Ltb4r1        | 16995     | 0,885724751 | 8,385086022 | 4,74E-06    |

|               |              |               |           |             |             |             |
|---------------|--------------|---------------|-----------|-------------|-------------|-------------|
| A_55_P2037425 | NM_008084    | Gapdh         | 14433     | 0,885464438 | 11,70724731 | 1,65E-05    |
| A_55_P1970105 | NM_013589    | Ltbp2         | 16997     | 0,883767425 | 7,300107527 | 0,000129115 |
| A_55_P2176729 | NM_007453    | Prdx6         | 11758     | 0,883259602 | 10,91191398 | 4,41E-05    |
| A_55_P2098697 | NM_009396    | Tnfaip2       | 21928     | 0,882985775 | 7,799064516 | 8,13E-06    |
| A_55_P1960238 | NM_172659    | Slc2a6        | 227659    | 0,882726174 | 9,298752688 | 0,001175823 |
| A_55_P1999561 | NM_001002842 | Pram1         | 378460    | 0,882608108 | 8,242290323 | 0,000962983 |
| A_51_P162437  | NM_001081412 | Bcr           | 110279    | 0,879077525 | 8,690849462 | 0,000405127 |
| A_55_P2081530 | NM_080559    | Sh3bgrl3      | 73723     | 0,879056899 | 13,83156989 | 5,06E-05    |
| A_51_P474459  | NM_007707    | Socs3         | 12702     | 0,87783357  | 9,726333333 | 0,000386038 |
| A_55_P1957954 | NM_009105    | Rsu1          | 20163     | 0,876940967 | 9,144096774 | 0,000295087 |
| A_51_P448664  | NM_011539    | Tbxas1        | 21391     | 0,874707681 | 8,562688172 | 0,000121297 |
| A_55_P2092831 | XM_001472097 | Gm2008        | 100039018 | 0,872834282 | 10,76488172 | 0,001430571 |
| A_51_P262721  | AK005967     | 0610009L18Rik | 66838     | 0,872638691 | 7,511989247 | 5,81E-10    |
| A_51_P381260  | NM_008761    | Fxyd5         | 18301     | 0,872241821 | 11,68298925 | 0,000253155 |
| A_55_P2081133 | NM_008084    | Gapdh         | 14433     | 0,871560455 | 11,45723656 | 1,65E-05    |
| A_55_P1979341 | NM_007806    | Cyba          | 13057     | 0,871222617 | 11,82596774 | 7,71E-05    |
| A_55_P2064996 | NM_009798    | Capzb         | 12345     | 0,870886913 | 9,38027957  | 9,61E-05    |
| A_52_P59681   | NM_008287    | Hrsp12        | 15473     | 0,868976529 | 8,344075269 | 0,001384228 |
| A_55_P2064507 | NM_026322    | Msra          | 110265    | 0,868430299 | 7,620430108 | 1,41E-09    |
| A_55_P2070766 | XM_001476070 | Gm3241        | 100041267 | 0,867811522 | 10,81704301 | 0,004362423 |
| A_52_P90363   | NM_029803    | Ifi27l2a      | 76933     | 0,867261735 | 13,84776344 | 0,022606236 |
| A_55_P1973347 | NR_002860    | A130040M12Rik | 319269    | 0,866740398 | 9,67255914  | 0,0010116   |
| A_55_P2044653 | NM_009999    | Cyp2b10       | 13088     | 0,866355619 | 7,808516129 | 0,007588616 |
| A_55_P2146254 | NM_001112715 | Ifitm1        | 68713     | 0,862216927 | 10,7465914  | 0,020170077 |
| A_55_P2077055 | NM_018746    | Itih4         | 16427     | 0,860515647 | 6,595290323 | 0,001619808 |
| A_55_P2039038 | NM_001081750 | Zfp664        | 269704    | 0,859838549 | 8,292698925 | 0,002650295 |
| A_55_P2074206 | NM_146128    | Dlgap4        | 228836    | 0,857226885 | 9,113989247 | 2,70E-07    |
| A_51_P452779  | NM_133198    | Pygl          | 110095    | 0,856921764 | 10,38095699 | 0,001693522 |
| A_55_P1981494 | AY989854     | H2-BI         | 14963     | 0,856892603 | 8,887354839 | 0,001956787 |
| A_51_P389988  | NM_016917    | Slc40a1       | 53945     | 0,856600996 | 7,947333333 | 0,011009117 |
| A_51_P193794  | NM_008512    | Lrp1          | 16971     | 0,855987909 | 7,33216129  | 6,03E-05    |
| A_55_P1992099 | NM_008982    | Ptprj         | 19271     | 0,8559367   | 8,750225806 | 0,000131362 |
| A_55_P2029574 | NM_008898    | Por           | 18984     | 0,855821479 | 8,798870968 | 3,16E-06    |
| A_55_P2021398 | XM_001473399 | Gm2393        | 100039733 | 0,855498578 | 10,90866667 | 0,001990026 |
| A_55_P2179413 | NM_011150    | Lgals3bp      | 19039     | 0,854616643 | 10,27933333 | 0,000385086 |
| A_55_P2045136 | AK153212     | I830127L07Rik | 546643    | 0,853322902 | 6,905935484 | 0,000882068 |
| A_52_P84096   | NM_001081274 | Pgd           | 110208    | 0,851806543 | 9,194623656 | 6,65E-05    |
| A_51_P272106  | NM_007705    | Cirbp         | 12696     | 0,850837838 | 8,104010753 | 0,001402959 |
| A_55_P1998578 | NM_030694    | Ifitm2        | 80876     | 0,85037909  | 9,701172043 | 7,75E-05    |
| A_55_P2086954 | XM_001479991 | Gm4372        | 100043336 | 0,849611664 | 10,87366667 | 0,001924294 |
| A_66_P136801  | NR_002864    | Peg13         | 353342    | 0,849600996 | 7,816763441 | 1,46E-07    |
| A_52_P354682  | NM_029001    | Elovl7        | 74559     | 0,849450213 | 6,784064516 | 7,88E-06    |
| A_51_P390715  | NM_011577    | Tgfb1         | 21803     | 0,849328592 | 7,820967742 | 1,13E-05    |
| A_55_P2095345 | NM_001177302 | Rara          | 19401     | 0,849305121 | 10,45258065 | 0,00036961  |
| A_51_P405397  | NM_007899    | Ecm1          | 13601     | 0,84805761  | 11,68043011 | 0,004458763 |
| A_55_P1957413 | NM_019391    | Lsp1          | 16985     | 0,846922475 | 13,20252688 | 0,000839415 |
| A_55_P2176731 | NM_007453    | Prdx6         | 11758     | 0,845165718 | 10,34212903 | 6,94E-05    |
| A_55_P2023076 | NM_023142    | Arpc1b        | 11867     | 0,844041963 | 11,03565591 | 2,45E-06    |
| A_55_P2059342 | NM_010684    | Lamp1         | 16783     | 0,842654339 | 11,87770968 | 8,58E-07    |
| A_51_P312121  | NM_011723    | Xdh           | 22436     | 0,842088905 | 7,42283871  | 1,12E-05    |

|               |              |               |           |             |             |             |
|---------------|--------------|---------------|-----------|-------------|-------------|-------------|
| A_52_P13815   | NM_010686    | Laptm5        | 16792     | 0,834766003 | 8,477064516 | 0,000575613 |
| A_51_P146149  | NM_008437    | Napsa         | 16541     | 0,831389758 | 8,676956989 | 4,69E-05    |
| A_51_P478895  | NM_172894    | Ppp6r1        | 243819    | 0,830451636 | 7,437       | 1,79E-07    |
| A_55_P2041584 | XM_001003844 | F420015M19Rik | 619329    | 0,829290185 | 8,739602151 | 3,51E-05    |
| A_52_P196105  | NM_175274    | Ttyh3         | 78339     | 0,829066856 | 9,08916129  | 0,000215874 |
| A_52_P456640  | NM_010208    | Fgr           | 14191     | 0,82586202  | 8,545032258 | 0,000157349 |
| A_55_P2074636 | NM_172723    | Adap1         | 231821    | 0,824610953 | 9,885247312 | 1,48E-05    |
| A_55_P1993940 | NM_080559    | Sh3bgrl3      | 73723     | 0,824405405 | 11,85797849 | 7,51E-05    |
| A_52_P476754  | NM_176860    | Ubash3b       | 72828     | 0,823825747 | 9,350569892 | 0,000842538 |
| A_51_P494675  | NM_028071    | Cotl1         | 72042     | 0,823749644 | 12,03619355 | 0,000225802 |
| A_55_P2172852 | NM_025760    | Ptplad2       | 66775     | 0,823549075 | 8,718612903 | 0,000350985 |
| A_52_P515247  | NM_007486    | Arhgdb        | 11857     | 0,823428165 | 13,02104301 | 0,000138102 |
| A_55_P1977653 | NM_001081390 | Pald          | 72333     | 0,821783073 | 6,750365591 | 0,000421236 |
| A_55_P1965772 | NM_001163337 | Atp2a3        | 53313     | 0,819154339 | 9,957010753 | 0,000174692 |
| A_55_P1965655 | NM_026849    | Mtmr14        | 97287     | 0,818191323 | 6,612612903 | 2,17E-05    |
| A_55_P2063505 | XM_001479508 | Gm4235        | 100043109 | 0,818157183 | 10,29732258 | 0,000882336 |
| A_55_P1956160 | NM_001081032 | Gm8909        | 667977    | 0,8156899   | 7,269569892 | 0,021080845 |
| A_52_P365011  | NM_010194    | Fes           | 14159     | 0,81247155  | 8,657430108 | 0,000108588 |
| A_55_P2020371 | XM_975056    | Gm11543       | 665174    | 0,810564011 | 6,812333333 | 0,05985704  |
| A_55_P1960479 | XM_001475709 | Gm3114        | 100041051 | 0,810370555 | 10,33202151 | 0,001075404 |
| A_55_P1991783 | XM_001477578 | Gm7149        | 635092    | 0,810058321 | 10,75172043 | 0,002710164 |
| A_55_P1972872 | NM_001005858 | I830012O16Rik | 667370    | 0,807228307 | 8,637258065 | 0,045216382 |
| A_55_P2462377 | NM_008740    | Nsf           | 18195     | 0,806339972 | 7,738182796 | 1,65E-06    |
| A_51_P455807  | NM_133838    | Ehd4          | 98878     | 0,80587909  | 10,58676344 | 1,95E-05    |
| A_55_P2183208 | NM_001045532 | Prl2c1        | 666317    | 0,804463727 | 6,823268817 | 0,000618899 |
| A_51_P341465  | NM_009970    | Csf2ra        | 12982     | 0,804238976 | 9,626774194 | 0,001092063 |
| A_55_P2055638 | AK168707     | Gsn           | 227753    | 0,803918208 | 10,09515054 | 0,001018524 |
| A_55_P2054409 | NM_011089    | Pira2         | 18725     | 0,803263158 | 8,266892473 | 0,000409749 |
| A_55_P1996826 | NM_026818    | Cilp2         | 68709     | 0,801522048 | 6,630086022 | 0,080795672 |
| A_55_P2106690 | NM_011527    | Tal1          | 21349     | 0,801254623 | 8,818978495 | 0,000474739 |
| A_51_P111962  | NM_001141922 | Bean1         | 65115     | 0,800476529 | 7,061569892 | 0,000818354 |
| A_55_P2019833 | XM_001477941 | Gm3790        | 100042323 | 0,799564011 | 10,66158065 | 0,002201141 |
| A_51_P329928  | NM_013750    | Phlda3        | 27280     | 0,79792532  | 8,414645161 | 0,001945276 |
| A_55_P2175880 | NM_019946    | Mgst1         | 56615     | 0,797788051 | 8,247956989 | 0,001429829 |
| A_55_P2144110 | NM_001045964 | Mink1         | 50932     | 0,796048364 | 8,643204301 | 8,17E-05    |
| A_55_P2076580 | NM_130864    | Acaa1a        | 113868    | 0,796027738 | 9,742924731 | 1,35E-05    |
| A_55_P2172470 | NM_022029    | Nrgn          | 64011     | 0,796007112 | 11,47164516 | 0,002652856 |
| A_52_P563617  | NM_133772    | Ssbp4         | 76900     | 0,79565505  | 8,69083871  | 2,77E-07    |
| A_51_P288138  | NM_008039    | Fpr2          | 14289     | 0,793541252 | 8,834946237 | 0,011523902 |
| A_55_P1955747 | NR_002890    | Gm12070       | 654472    | 0,790371266 | 11,57163441 | 1,13E-05    |
| A_55_P2065991 | NM_016740    | S100a11       | 20195     | 0,789793741 | 9,895806452 | 0,003130199 |
| A_55_P2007768 | NR_033633    | Gm8709        | 667572    | 0,789067568 | 11,25686022 | 7,05E-05    |
| A_51_P140942  | NM_018739    | Rp9           | 55934     | 0,788075391 | 8,660860215 | 6,61E-05    |
| A_52_P606774  | NM_021420    | Stk4          | 58231     | 0,78790256  | 9,394827957 | 9,77E-05    |
| A_51_P326191  | NM_009251    | Serpina3g     | 20715     | 0,786521337 | 8,600623656 | 0,020360886 |
| A_51_P281089  | NM_011313    | S100a6        | 20200     | 0,786317212 | 12,2034086  | 0,004137145 |
| A_51_P308590  | NM_134084    | Ppif          | 105675    | 0,783972262 | 7,15127957  | 5,10E-05    |
| A_51_P321150  | NM_017372    | Lyz2          | 17105     | 0,783461593 | 9,698978495 | 0,00613565  |
| A_55_P1994042 | NM_001139519 | Zbp1          | 58203     | 0,78234495  | 9,856774194 | 0,003078741 |
| A_55_P1952882 | AF233647     | Cyp4f18       | 72054     | 0,781921764 | 11,02427957 | 0,000924496 |

|               |              |          |           |             |             |             |
|---------------|--------------|----------|-----------|-------------|-------------|-------------|
| A_55_P2004016 | NM_030209    | Crispld2 | 78892     | 0,780225462 | 7,958666667 | 0,034698761 |
| A_55_P2022585 | NM_011093    | Pira6    | 18729     | 0,779806543 | 9,822333333 | 0,000123143 |
| A_55_P2109857 | NM_009061    | Rgs2     | 19735     | 0,778459459 | 10,95741935 | 0,001581864 |
| A_52_P12806   | NR_003623    | Gm5069   | 277333    | 0,777433144 | 10,88412903 | 2,23E-06    |
| A_55_P2068248 | XM_001473755 | Gm2488   | 100039907 | 0,777237553 | 9,962236559 | 0,00128669  |
| A_55_P2030638 | NM_026725    | Dusp23   | 68440     | 0,777004267 | 7,138419355 | 0,00086552  |
| A_55_P2124097 | NR_023357    | Gm6981   | 629557    | 0,770519915 | 10,65383871 | 4,49E-05    |
| A_51_P173100  | NM_145925    | Pttg1ip  | 108705    | 0,76956899  | 11,20139785 | 0,00701005  |
| A_55_P2075731 | XM_001475177 | Gm2943   | 100040748 | 0,769330725 | 10,48289247 | 0,008514124 |
| A_52_P363216  | NM_133219    | Gcnt2    | 14538     | 0,767438834 | 8,051387097 | 0,000750241 |
| A_55_P2055819 | NM_001037722 | Adam15   | 11490     | 0,766817212 | 8,825892473 | 0,000295239 |
| A_55_P2472435 | NM_018734    | Gbp3     | 55932     | 0,765931721 | 8,076924731 | 0,003787498 |
| A_55_P2079561 | NM_011090    | Lilra6   | 18726     | 0,765577525 | 10,56353763 | 0,003115063 |
| A_51_P202633  | NM_015766    | Ebi3     | 50498     | 0,765014225 | 8,089247312 | 1,68E-05    |
| A_55_P2092826 | NM_010730    | Anxa1    | 16952     | 0,763763158 | 10,76946237 | 0,013177706 |
| A_52_P190973  | NM_009502    | Vcl      | 22330     | 0,762882646 | 7,456182796 | 2,95E-05    |
| A_55_P2106666 | NM_009624    | Adcy9    | 11515     | 0,761007112 | 7,196795699 | 0,000352607 |
| A_55_P2141884 | NM_178598    | Tagln2   | 21346     | 0,759503556 | 9,970967742 | 0,000198339 |
| A_55_P1961760 | XM_001476058 | Gm3237   | 100041259 | 0,759480085 | 10,52258065 | 0,006638879 |
| A_51_P401668  | NM_010686    | Laptm5   | 16792     | 0,759418208 | 9,377741935 | 0,002280064 |
| A_55_P2124528 | NM_009795    | Capns1   | 12336     | 0,759290896 | 10,55343011 | 4,86E-06    |
| A_52_P72237   | NM_009609    | Actg1    | 11465     | 0,758003556 | 10,44377419 | 0,000964586 |
| A_55_P1959425 | NM_030696    | Slc16a3  | 80879     | 0,757928876 | 9,019451613 | 0,001898622 |
| A_52_P483336  | NM_007641    | Ms4a1    | 12482     | 0,757860597 | 9,257870968 | 0,001965389 |
| A_51_P513254  | NM_009007    | Rac1     | 19353     | 0,757219061 | 10,44262366 | 0,000222323 |
| A_55_P2171463 | NM_009145    | Nptn     | 20320     | 0,75550569  | 11,61836559 | 0,003871915 |
| A_55_P2066613 | NM_008879    | Lcp1     | 18826     | 0,754844239 | 9,043365591 | 0,001103145 |
| A_55_P2000853 | NM_175184    | Mvb12b   | 72543     | 0,754699858 | 8,543408602 | 0,001073145 |
| A_55_P2121662 | NM_011952    | Mapk3    | 26417     | 0,753889047 | 7,739763441 | 3,03E-07    |
| A_55_P2022251 | NM_009878    | Cdkn2d   | 12581     | 0,753541963 | 10,10264516 | 1,45E-05    |
| A_51_P463120  | NM_025760    | Ptplad2  | 66775     | 0,753516358 | 9,729677419 | 0,001593993 |
| A_55_P1998471 | NM_009114    | S100a9   | 20202     | 0,753411807 | 15,39022581 | 0,057309385 |
| A_51_P502456  | NR_004446    | H2-K2    | 630499    | 0,752894026 | 11,99265591 | 0,008991302 |
| A_51_P183812  | NM_011410    | Slfn4    | 20558     | 0,751613798 | 8,542268817 | 0,061671055 |
| A_55_P2115257 | NM_001037997 | Fert2    | 14158     | 0,751520626 | 6,913247312 | 0,033712947 |
| A_55_P2067505 | NM_030696    | Slc16a3  | 80879     | 0,751435989 | 8,942548387 | 0,001515996 |
| A_52_P282762  | NM_010851    | Myd88    | 17874     | 0,750991465 | 8,209247312 | 1,97E-05    |
| A_55_P2002963 | NM_009898    | Coro1a   | 12721     | 0,750221195 | 12,84963441 | 0,000996135 |
| A_52_P635338  | NM_010194    | Fes      | 14159     | 0,750123755 | 9,534451613 | 0,000789401 |
| A_55_P2029902 | NM_181584    | Gab3     | 210710    | 0,749216216 | 9,717150538 | 0,002082588 |
| A_55_P1967330 | NR_003623    | Gm5069   | 277333    | 0,747854196 | 9,934172043 | 4,62E-05    |
| A_55_P2068892 | NM_010559    | Il6ra    | 16194     | 0,747337127 | 10,32612903 | 0,000877019 |
| A_51_P406796  | NM_013873    | Sult4a1  | 29859     | 0,745229018 | 6,394451613 | 6,14E-05    |
| A_52_P527800  | NM_145158    | Emilin2  | 246707    | 0,74335633  | 10,16417204 | 0,004947969 |
| A_55_P2082841 | XM_001474255 | Gm2658   | 100040199 | 0,743285917 | 10,17101075 | 0,00264143  |
| A_55_P2052834 | NM_010734    | Lst1     | 16988     | 0,742192745 | 11,50219355 | 0,000890141 |
| A_66_P112305  | NM_053214    | Myo1f    | 17916     | 0,741521337 | 9,160817204 | 0,003253001 |
| A_51_P327295  | NM_021473    | Akr1a1   | 58810     | 0,740761024 | 9,558580645 | 2,17E-05    |
| A_55_P2039439 | NM_031868    | Ppp1ca   | 19045     | 0,74028165  | 11,75446237 | 4,24E-05    |
| A_55_P1961761 | NM_007831    | Dcc      | 13176     | 0,73978734  | 10,44027957 | 0,008457011 |

|               |              |               |           |             |             |             |
|---------------|--------------|---------------|-----------|-------------|-------------|-------------|
| A_55_P1965150 | NM_021549    | Pnkp          | 59047     | 0,739318634 | 9,791064516 | 0,000421692 |
| A_52_P132165  | NM_053262    | Hsd17b11      | 114664    | 0,738192745 | 8,056010753 | 9,94E-08    |
| A_51_P279163  | NM_172285    | Plcg2         | 234779    | 0,736510669 | 10,00193548 | 4,66E-05    |
| A_55_P2146185 | NM_011302    | Rs1           | 20147     | 0,734694168 | 10,89227957 | 0,021684838 |
| A_55_P2142873 | NM_001045964 | Mink1         | 50932     | 0,732377667 | 8,522225806 | 0,000247234 |
| A_55_P1977583 | NM_013469    | Anxa11        | 11744     | 0,7323734   | 8,907064516 | 0,000427086 |
| A_55_P2037584 | NM_133977    | Trf           | 22041     | 0,732310811 | 7,974698925 | 0,009823789 |
| A_66_P119034  | NM_013737    | Pla2g7        | 27226     | 0,731698435 | 10,00905376 | 0,004577914 |
| A_55_P2034300 | NM_001168256 | Tmem40        | 94346     | 0,730658606 | 12,24375269 | 0,019293775 |
| A_51_P256202  | NM_022325    | Ctsz          | 64138     | 0,730541963 | 10,54234409 | 0,000469576 |
| A_51_P384629  | NM_009983    | Ctsd          | 13033     | 0,729682788 | 11,50787097 | 0,000658545 |
| A_55_P2134148 | NM_029354    | Mzt2          | 72083     | 0,729421764 | 7,002505376 | 0,002614674 |
| A_55_P2144850 | NM_011186    | Psmb5         | 19173     | 0,72921266  | 11,49960215 | 5,07E-06    |
| A_66_P123055  | NR_033535    | Gm10845       | 100038734 | 0,728858464 | 9,354215054 | 0,014617728 |
| A_55_P1984284 | NM_008084    | Gapdh         | 14433     | 0,728300142 | 11,2006129  | 0,000150235 |
| A_55_P1966194 | NM_019549    | Plek          | 56193     | 0,728273115 | 11,6005914  | 0,002513806 |
| A_51_P493558  | NM_145417    | Rnpep         | 215615    | 0,727534139 | 8,20416129  | 2,14E-05    |
| A_55_P2118037 | NM_007547    | Sirpa         | 19261     | 0,726820768 | 8,207698925 | 0,000186459 |
| A_51_P462448  | NM_001037741 | Gpx4          | 625249    | 0,726397582 | 12,3612043  | 0,000239719 |
| A_55_P2017944 | NM_026695    | Etfb          | 110826    | 0,726177809 | 9,479397849 | 3,66E-05    |
| A_51_P234864  | NM_178639    | Sfxn5         | 94282     | 0,726071835 | 7,414892473 | 0,00042455  |
| A_51_P403334  | NM_024192    | Cuedc2        | 67116     | 0,725487909 | 9,058322581 | 6,10E-06    |
| A_52_P199614  | NM_001146022 | Wdfy4         | 545030    | 0,725052632 | 9,340870968 | 0,000581919 |
| A_52_P613498  | NM_026127    | 4833420G17Rik | 67392     | 0,725021337 | 8,128688172 | 0,000843654 |
| A_55_P2134790 | NM_001024945 | Qsox1         | 104009    | 0,724911095 | 9,529021505 | 0,000157681 |
| A_51_P450100  | NM_026124    | 1110008F13Rik | 67388     | 0,722449502 | 9,695483871 | 4,55E-06    |
| A_55_P2174743 | NM_018747    | Akap7         | 432442    | 0,722163585 | 8,499677419 | 0,002754781 |
| A_55_P2041070 | NM_001083927 | Tle3          | 21887     | 0,721933144 | 9,074967742 | 6,68E-05    |
| A_51_P254656  | NM_008230    | Hdc           | 15186     | 0,721598862 | 9,954333333 | 0,024561999 |
| A_55_P2136832 | NR_023357    | Gm6981        | 629557    | 0,720733997 | 11,08764516 | 3,44E-05    |
| A_55_P1998416 | NM_008330    | Ifi47         | 15953     | 0,719778805 | 11,34104301 | 0,00038835  |
| A_55_P2110713 | NM_007585    | Anxa2         | 12306     | 0,719435989 | 11,85008602 | 0,003905475 |
| A_55_P1998942 | NM_145211    | Oas1a         | 246730    | 0,719027027 | 8,830129032 | 0,027074918 |
| A_51_P109171  | NM_177614    | Os9           | 216440    | 0,718903272 | 8,625451613 | 4,02E-07    |
| A_51_P237688  | NM_133697    | Smim14        | 68552     | 0,715726885 | 9,060397849 | 0,005254073 |
| A_52_P400999  | NM_020260    | Arhgap31      | 12549     | 0,715251778 | 6,57044086  | 0,000218426 |
| A_55_P2177539 | NM_011434    | Sod1          | 20655     | 0,714256046 | 11,33780645 | 4,45E-08    |
| A_55_P1962747 | NM_207105    | H2-Ab1        | 14961     | 0,714093172 | 11,86515054 | 0,01731246  |
| A_51_P396854  | NM_019502    | Timm10b       | 14356     | 0,713672831 | 9,547763441 | 9,09E-05    |
| A_51_P433824  | NM_009415    | Tpi1          | 21991     | 0,713630156 | 9,881150538 | 0,000116019 |
| A_55_P2035613 | NM_027154    | Tmbim1        | 69660     | 0,713421764 | 7,684774194 | 0,014049849 |
| A_51_P225793  | NM_175181    | Prr5l         | 72446     | 0,712371266 | 9,644569892 | 0,00181838  |
| A_55_P1992455 | NM_011696    | Vdac3         | 22335     | 0,711537696 | 9,900064516 | 0,000562572 |
| A_55_P2105271 | NM_001114088 | Pdlim7        | 67399     | 0,711320057 | 9,74383871  | 0,005495828 |
| A_51_P470079  | NM_010555    | Il1r2         | 16178     | 0,711105263 | 8,07572043  | 0,04137318  |
| A_51_P295215  | NM_172943    | Alkbh5        | 268420    | 0,709457326 | 9,164935484 | 0,00118487  |
| A_51_P460954  | NM_009139    | Ccl6          | 20305     | 0,709323613 | 11,19388172 | 0,006713351 |
| A_51_P492346  | NM_026685    | Tmem174       | 68344     | 0,708921764 | 7,149193548 | 2,32E-05    |
| A_51_P270733  | NM_009303    | Syngn1        | 20972     | 0,708428876 | 8,142064516 | 0,014128549 |
| A_51_P238786  | NM_008562    | Mcl1          | 17210     | 0,707929587 | 11,46219355 | 0,000229594 |



|               |              |               |           |             |             |             |
|---------------|--------------|---------------|-----------|-------------|-------------|-------------|
| A_55_P2064043 | NM_009851    | Cd44          | 12505     | 0,707463727 | 8,362086022 | 1,57E-05    |
| A_51_P374869  | NM_013850    | Abca7         | 27403     | 0,706982219 | 10,2913871  | 4,22E-05    |
| A_55_P2041457 | XM_001475948 | Gm3195        | 100041198 | 0,706736131 | 9,901086022 | 0,004144236 |
| A_51_P469008  | NM_010119    | Ehd1          | 13660     | 0,706387624 | 10,92691398 | 0,007846472 |
| A_55_P1961188 | NR_023357    | Gm6981        | 629557    | 0,705187055 | 9,830537634 | 0,000152478 |
| A_66_P139546  | NM_008344    | Igfbp6        | 16012     | 0,704337838 | 7,71744086  | 0,005841505 |
| A_55_P2120141 | XM_001480410 | Gm4522        | 100043565 | 0,703478663 | 10,45496774 | 0,015480078 |
| A_55_P2238406 | NR_028126    | 6330407A03Rik | 70720     | 0,702760313 | 7,384817204 | 0,001067807 |
| A_52_P592909  | NM_026384    | Dgat2         | 67800     | 0,70059744  | 7,859569892 | 0,006110113 |
| A_55_P2181738 | NM_013590    | Lyz1          | 17110     | 0,700576102 | 12,21576344 | 0,010643953 |
| A_52_P351816  | NM_010578    | Itgb1         | 16412     | 0,700381223 | 6,980397849 | 4,21E-05    |
| A_51_P481238  | NM_027293    | Dopey2        | 70028     | 0,700182077 | 8,395870968 | 0,000215142 |
| A_55_P2158701 | NM_175654    | Hist1h4d      | 319156    | 0,699145092 | 9,533677419 | 0,003378118 |
| A_55_P2184364 | NM_020579    | B4galt3       | 57370     | 0,698076102 | 7,798774194 | 0,003055208 |
| A_55_P1979457 | NM_016764    | Prdx4         | 53381     | 0,697911095 | 7,272537634 | 2,70E-06    |
| A_52_P135873  | XM_001475453 | Gm2744        | 100040381 | 0,697780228 | 9,232591398 | 0,024564527 |
| A_52_P187132  | NM_011732    | Ybx1          | 22608     | 0,697397582 | 9,875129032 | 0,004001058 |
| A_52_P318438  | NM_008667    | Nab1          | 17936     | 0,696807255 | 7,266817204 | 8,20E-10    |
| A_55_P1981829 | NM_001004193 | Rhox8         | 434768    | 0,696542674 | 10,1928172  | 0,021329793 |
| A_55_P2146560 | NM_207105    | H2-Ab1        | 14961     | 0,696448791 | 11,91726882 | 0,019030942 |
| A_51_P505823  | NM_028013    | Endod1        | 71946     | 0,696375533 | 8,6         | 0,007680669 |
| A_55_P2103561 | NM_007453    | Prdx6         | 11758     | 0,696006401 | 11,84454839 | 0,001615123 |
| A_55_P2007022 | NM_011925    | Cd97          | 26364     | 0,69516643  | 12,16630108 | 0,005935623 |
| A_51_P228768  | NM_011409    | Sifn3         | 20557     | 0,693315078 | 6,928827957 | 0,02322085  |
| A_52_P59579   | NM_026669    | Tmbim6        | 110213    | 0,693182077 | 9,531301075 | 4,55E-05    |
| A_55_P2054743 | NM_172507    | Sh3bgrl2      | 212531    | 0,692231152 | 7,470860215 | 0,000516704 |
| A_55_P2013113 | NM_007523    | Bak1          | 12018     | 0,691972262 | 8,624075269 | 8,41E-05    |
| A_55_P1987770 | NM_025498    | Psenen        | 66340     | 0,690275249 | 11,92493548 | 0,00075651  |
| A_51_P328652  | NM_133348    | Acot7         | 70025     | 0,689943101 | 9,12488172  | 3,44E-05    |
| A_55_P1957038 | NM_181796    | Gstp2         | 14869     | 0,689674964 | 11,38224731 | 4,74E-06    |
| A_51_P323620  | NM_144543    | Thyn1         | 77862     | 0,689362731 | 7,777946237 | 1,56E-07    |
| A_55_P1960999 | NM_011082    | Pigr          | 18703     | 0,689321479 | 10,8783871  | 0,005312585 |
| A_51_P324572  | NM_009818    | Ctnna1        | 12385     | 0,688861309 | 8,992494624 | 0,000749617 |
| A_55_P1952950 | NM_001110132 | Cic           | 71722     | 0,688820768 | 10,23646237 | 0,001617132 |
| A_52_P604629  | NM_153287    | Csrnp1        | 215418    | 0,68840825  | 8,077870968 | 0,000133549 |
| A_55_P2066116 | NM_033601    | Bcl3          | 12051     | 0,687795875 | 9,005225806 | 0,000312267 |
| A_55_P1987264 | NM_010312    | Gnb2          | 14693     | 0,686686344 | 11,14429032 | 0,001293573 |
| A_55_P2020378 | NM_133838    | Ehd4          | 98878     | 0,686378378 | 7,455150538 | 6,56E-06    |
| A_55_P2002103 | NM_001142701 | Hmha1         | 70719     | 0,686342817 | 12,24780645 | 0,002181944 |
| A_55_P1990785 | NM_027678    | Zranb3        | 226409    | 0,685843528 | 7,651935484 | 0,015094105 |
| A_66_P134453  | NM_001033780 | I830077J02Rik | 433638    | 0,68347155  | 7,766784946 | 0,001001339 |
| A_55_P1959818 | NM_001168256 | Tmem40        | 94346     | 0,682110242 | 12,01733333 | 0,02377068  |
| A_55_P1956130 | BC025170     | LOC68395      | 68395     | 0,681012091 | 11,99882796 | 0,005734005 |
| A_51_P156857  | NM_134133    | Smim3         | 106878    | 0,680327169 | 10,70144086 | 0,030054443 |
| A_55_P1967504 | NM_145215    | Abhd11        | 68758     | 0,680290185 | 7,739043011 | 3,28E-05    |
| A_55_P2068247 | XM_001473755 | Gm2488        | 100039907 | 0,679066856 | 9,666806452 | 0,004538583 |
| A_52_P576442  | NM_146057    | Dap           | 223453    | 0,678645092 | 11,25136559 | 0,004789733 |
| A_51_P291460  | NR_003630    | Gm6498        | 624367    | 0,678532717 | 10,77611828 | 7,92E-05    |
| A_55_P1994258 | NM_008084    | Gapdh         | 14433     | 0,678219772 | 8,423290323 | 3,02E-05    |
| A_52_P116134  | NM_009656    | Aldh2         | 11669     | 0,677265292 | 10,27721505 | 0,050300821 |

|               |              |               |           |             |             |             |
|---------------|--------------|---------------|-----------|-------------|-------------|-------------|
| A_55_P1954921 | NM_013908    | Fbxw5         | 30839     | 0,67721835  | 8,57244086  | 9,28E-06    |
| A_52_P466090  | NM_018851    | Samhd1        | 56045     | 0,676214083 | 8,931483871 | 0,001680891 |
| A_51_P272876  | NM_001160378 | Fam46a        | 212943    | 0,676048364 | 8,15372043  | 0,00025976  |
| A_52_P578790  | NM_013739    | Dok3          | 27261     | 0,6749367   | 8,521204301 | 8,48E-05    |
| A_51_P517870  | NM_198429    | Nfatc1        | 18018     | 0,67473542  | 8,073096774 | 0,000933913 |
| A_55_P2052016 | NM_030209    | Crispld2      | 78892     | 0,673617354 | 7,70783871  | 0,05283575  |
| A_52_P195018  | NM_139206    | Arap3         | 106952    | 0,673507112 | 8,500172043 | 0,000219336 |
| A_52_P253004  | NM_022327    | Ralb          | 64143     | 0,673426031 | 8,478107527 | 2,15E-05    |
| A_55_P2027213 | NM_001163615 | Krtap20-2     | 622935    | 0,673123755 | 7,050182796 | 3,96E-05    |
| A_55_P1959953 | NM_183162    | Helz2         | 229003    | 0,673029872 | 9,383634409 | 0,002669683 |
| A_55_P2083411 | NM_024444    | Cyp4f18       | 72054     | 0,671365576 | 10,76773118 | 0,007595059 |
| A_55_P2045741 | NM_011815    | Fyb           | 23880     | 0,670537696 | 7,72044086  | 0,003254336 |
| A_51_P241943  | NM_001081168 | Sap30l        | 50724     | 0,670311522 | 10,00089247 | 0,000127737 |
| A_55_P2003996 | NM_008207    | H2-T24        | 15042     | 0,669774538 | 8,493096774 | 0,000315199 |
| A_55_P2114697 | NM_008103    | Gcm1          | 14531     | 0,668967283 | 9,874086022 | 0,011419947 |
| A_55_P2022211 | NM_026162    | Plxdc2        | 67448     | 0,668837838 | 6,934193548 | 0,027550832 |
| A_55_P2028847 | XM_001476302 | Gm9468        | 669759    | 0,668523471 | 9,951311828 | 0,016135096 |
| A_55_P1965725 | NM_008084    | Gapdh         | 14433     | 0,668210526 | 8,522483871 | 1,54E-05    |
| A_55_P2251181 | AK013795     | 2900076A13Rik | 73002     | 0,667545519 | 7,667849462 | 0,000285977 |
| A_51_P297679  | NM_008225    | Hcls1         | 15163     | 0,667142248 | 11,28210753 | 0,000738018 |
| A_55_P1987201 | NM_009794    | Capn2         | 12334     | 0,66677027  | 9,174548387 | 0,000309671 |
| A_55_P1952166 | NM_007880    | Arid3a        | 13496     | 0,666550498 | 8,298741935 | 1,01E-05    |
| A_51_P260548  | NM_009149    | Glg1          | 20340     | 0,666445235 | 8,697763441 | 0,000180328 |
| A_52_P84901   | NM_133891    | Slc44a1       | 100434    | 0,666421764 | 8,560376344 | 0,02712252  |
| A_55_P1957459 | NM_013532    | Lilrb4        | 14728     | 0,665544808 | 10,00173118 | 0,028596675 |
| A_51_P338600  | NM_025387    | Tmem14c       | 66154     | 0,665489331 | 7,436634409 | 0,02355622  |
| A_55_P1959973 | NM_175539    | Dcaf12l2      | 245403    | 0,664453058 | 8,273967742 | 0,027209136 |
| A_51_P278034  | NM_027356    | Ufsp1         | 70240     | 0,664447368 | 7,188752688 | 0,001066413 |
| A_52_P56751   | NM_008879    | Lcp1          | 18826     | 0,66435633  | 10,07631183 | 0,004133295 |
| A_52_P508089  | NM_011179    | Psap          | 19156     | 0,664301565 | 10,07674194 | 0,003185551 |
| A_52_P516021  | NM_011201    | Ptpn1         | 19246     | 0,662780228 | 8,429741935 | 8,07E-05    |
| A_55_P2096127 | XM_001473875 | Gm2527        | 100039971 | 0,661383357 | 9,496946237 | 0,00352992  |
| A_51_P474169  | NM_144883    | Proser2       | 227545    | 0,661098151 | 8,498666667 | 0,018776549 |
| A_52_P322141  | NM_001081291 | Ccdc88b       | 78317     | 0,660458748 | 10,38       | 0,00128643  |
| A_55_P2135200 | NM_181542    | Slfn10-ps     | 237887    | 0,659090327 | 6,96527957  | 7,68E-06    |
| A_55_P2072985 | NM_001076554 | Sptan1        | 20740     | 0,658889047 | 8,986172043 | 0,003433785 |
| A_51_P490305  | NM_023065    | Ifi30         | 65972     | 0,65875889  | 8,932752688 | 0,000238945 |
| A_52_P514061  | NM_011061    | Padi4         | 18602     | 0,657669275 | 6,776569892 | 0,000622618 |
| A_52_P353417  | NM_010299    | Gm2a          | 14667     | 0,656736842 | 7,420827957 | 7,39E-06    |
| A_55_P2125208 | NM_001172205 | Arid5a        | 214855    | 0,655975818 | 10,13906452 | 0,00252535  |
| A_55_P2115136 | NM_028732    | 4632428N05Rik | 74048     | 0,655685633 | 8,793096774 | 0,000222919 |
| A_55_P2119463 | NM_010281    | Ggh           | 14590     | 0,655541963 | 8,101666667 | 0,001307157 |
| A_55_P1957378 | NM_011676    | Unc119        | 22248     | 0,654915363 | 9,360483871 | 3,16E-05    |
| A_55_P2070913 | NM_025974    | Rpl14         | 67115     | 0,654671408 | 13,26176344 | 0,006632143 |
| A_55_P2171788 | XM_001474084 | Gm2598        | 100040097 | 0,654403983 | 9,943655914 | 0,027609859 |
| A_51_P440399  | NM_012060    | Bcap31        | 27061     | 0,653917496 | 9,469268817 | 0,00052292  |
| A_55_P2062936 | NM_013855    | Abca3         | 27410     | 0,653513514 | 8,241       | 1,84E-06    |
| A_55_P2091691 | NM_019837    | Nudt3         | 56409     | 0,652644381 | 11,14315054 | 0,017896925 |
| A_51_P382849  | NM_010330    | Emb           | 13723     | 0,651901138 | 8,53255914  | 0,002895203 |
| A_51_P222475  | NM_053252    | Ehbp1l1       | 114601    | 0,651894737 | 8,391817204 | 6,44E-08    |

|               |              |               |        |             |             |             |
|---------------|--------------|---------------|--------|-------------|-------------|-------------|
| A_55_P2099560 | NM_031159    | Apobec1       | 11810  | 0,651534851 | 8,995215054 | 0,001422832 |
| A_51_P507942  | NM_029097    | Atp13a2       | 74772  | 0,651456615 | 9,457258065 | 0,000701552 |
| A_51_P384148  | NM_013649    | Ryk           | 20187  | 0,650620199 | 6,359645161 | 0,003170152 |
| A_66_P115061  | NM_025695    | Smc6          | 67241  | 0,650334282 | 7,22083871  | 0,000716997 |
| A_55_P2004562 | NM_001170851 | Klra2         | 16633  | 0,649206259 | 6,684204301 | 0,025345741 |
| A_51_P227718  | NM_145149    | Rasgrp4       | 233046 | 0,649153627 | 6,565215054 | 9,39E-08    |
| A_52_P70854   | NM_020507    | Tob2          | 57259  | 0,649038407 | 7,672860215 | 4,18E-07    |
| A_55_P2033445 | NM_011610    | Tnfrsf1b      | 21938  | 0,648513514 | 6,901021505 | 2,81E-06    |
| A_55_P2151986 | NM_001038664 | Gngt2         | 14710  | 0,648479374 | 9,542731183 | 0,002285717 |
| A_51_P143805  | NM_025339    | Tmem42        | 66079  | 0,646388336 | 7,784698925 | 0,00011145  |
| A_51_P247249  | NM_009662    | Alox5         | 11689  | 0,646043385 | 7,89316129  | 0,001595499 |
| A_51_P451346  | NM_011803    | Klf6          | 23849  | 0,645870555 | 10,30712903 | 0,001193027 |
| A_55_P2122334 | NM_008688    | Nfic          | 18029  | 0,64519559  | 7,37611828  | 0,000556341 |
| A_52_P549827  | NM_019946    | Mgst1         | 56615  | 0,644582504 | 7,818946237 | 0,003369405 |
| A_55_P1995175 | AK010293     | Sult4a1       | 29859  | 0,643755334 | 6,366182796 | 8,99E-05    |
| A_51_P252677  | NM_026738    | 1110007C09Rik | 68480  | 0,643631579 | 10,60950538 | 0,000686692 |
| A_66_P116252  | NM_130447    | Dusp16        | 70686  | 0,643541963 | 7,62111828  | 0,00128669  |
| A_55_P1976928 | NM_001009573 | Unc13d        | 70450  | 0,643347084 | 8,727752688 | 2,70E-07    |
| A_51_P392687  | NM_011701    | Vim           | 22352  | 0,643229018 | 10,70829032 | 0,011904608 |
| A_66_P102733  | NM_025455    | Ccdc28b       | 66264  | 0,642793741 | 7,78083871  | 5,79E-09    |
| A_51_P268343  | NM_025857    | Aagab         | 66939  | 0,641949502 | 8,198430108 | 1,66E-07    |
| A_55_P2052425 | NM_145482    | Setd4         | 224440 | 0,641852774 | 7,502774194 | 2,45E-05    |
| A_55_P1957353 | XM_907302    | Slfn13l       | 631406 | 0,641100284 | 8,955333333 | 0,00932952  |
| A_55_P2074647 | NM_144521    | Snap47        | 67826  | 0,641042674 | 6,541655914 | 9,13E-07    |
| A_51_P163953  | NM_008741    | Nsg2          | 18197  | 0,641034851 | 8,987860215 | 0,017186143 |
| A_52_P517896  | NM_028636    | Man2c1        | 73744  | 0,640945946 | 8,439       | 5,97E-05    |
| A_52_P590396  | NM_019972    | Sort1         | 20661  | 0,64047724  | 6,784784946 | 5,99E-06    |
| A_55_P1971840 | NM_010739    | Muc13         | 17063  | 0,640265292 | 7,195774194 | 0,003050576 |
| A_55_P2143219 | NM_011242    | Rasgrp2       | 19395  | 0,639594595 | 10,63692473 | 0,00632775  |
| A_51_P418526  | NM_027324    | Sfxn1         | 14057  | 0,639148649 | 8,186569892 | 0,00010951  |
| A_55_P2093874 | NM_146131    | Pbxip1        | 229534 | 0,638529872 | 10,6961828  | 0,000683651 |
| A_66_P129048  | NM_001190445 | 2610002J02Rik | 67513  | 0,63842532  | 9,379731183 | 8,62E-05    |
| A_51_P172853  | NM_009841    | Cd14          | 12475  | 0,637615932 | 7,488139785 | 0,027703833 |
| A_55_P2019719 | NM_145227    | Oas2          | 246728 | 0,636404694 | 9,584860215 | 0,054901853 |
| A_51_P293982  | NM_153119    | Plekho2       | 102595 | 0,635864154 | 7,888430108 | 0,001438497 |
| A_55_P2106250 | NM_025960    | Trappc6a      | 67091  | 0,635745377 | 9,35144086  | 6,80E-06    |
| A_52_P303176  | NM_024461    | 1810037I17Rik | 67704  | 0,63564367  | 6,655096774 | 0,025198261 |
| A_55_P2151116 | NM_144822    | Micu1         | 216001 | 0,634940256 | 10,32601075 | 4,68E-05    |
| A_55_P2071329 | NM_019566    | Rhog          | 56212  | 0,634551209 | 11,77180645 | 3,06E-06    |
| A_52_P316933  | NM_172507    | Sh3bgrl2      | 212531 | 0,634152205 | 9,765225806 | 0,01042668  |
| A_55_P2097279 | NM_011095    | Pirb          | 18733  | 0,632558321 | 10,67548387 | 0,032785486 |
| A_51_P193146  | NM_028595    | Ms4a6c        | 73656  | 0,632392603 | 8,30672043  | 0,001410465 |
| A_55_P2037585 | NM_133977    | Trf           | 22041  | 0,632307966 | 7,090021505 | 0,005910198 |
| A_66_P114784  | NM_013737    | Pla2g7        | 27226  | 0,632034139 | 7,546172043 | 0,000689841 |
| A_55_P2075140 | NM_022433    | Sirt3         | 64384  | 0,631648649 | 8,497602151 | 0,000464772 |
| A_55_P2130970 | NM_001163576 | Parp10        | 671535 | 0,631179943 | 10,5983871  | 0,007740974 |
| A_55_P1955227 | NM_010261    | Rabac1        | 14470  | 0,629533428 | 11,20965591 | 0,000102943 |
| A_51_P330428  | NM_007918    | Eif4ebp1      | 13685  | 0,628771693 | 10,12036559 | 0,000664897 |
| A_55_P2027999 | NM_001146100 | Hk1           | 15275  | 0,628554765 | 10,06466667 | 0,001544956 |
| A_52_P288873  | NM_029362    | Chmp4b        | 75608  | 0,627536984 | 9,404698925 | 3,03E-06    |

|               |              |               |        |             |             |             |
|---------------|--------------|---------------|--------|-------------|-------------|-------------|
| A_55_P2072373 | NM_010833    | Msn           | 17698  | 0,626267425 | 11,30021505 | 0,000487404 |
| A_55_P2024888 | NM_021281    | Ctss          | 13040  | 0,626157895 | 11,07407527 | 0,011292646 |
| A_55_P2067362 | AK171155     | Dpep2         | 319446 | 0,625078236 | 6,639268817 | 0,000282916 |
| A_55_P1955841 | NM_008906    | Ctsa          | 19025  | 0,624507112 | 10,8131828  | 0,005685984 |
| A_51_P510849  | NM_030018    | Tmem50b       | 77975  | 0,623134424 | 8,625301075 | 7,10E-06    |
| A_55_P1958246 | NM_011552    | Tcof1         | 21453  | 0,623128023 | 8,05655914  | 0,006890095 |
| A_55_P2044045 | NM_011732    | Ybx1          | 22608  | 0,623103129 | 10,03211828 | 6,60E-05    |
| A_51_P312437  | NM_025522    | Dhrs7         | 66375  | 0,622302276 | 9,381849462 | 0,007854051 |
| A_55_P2046398 | NM_144958    | Eif4a1        | 13681  | 0,621213371 | 8,525193548 | 6,49E-05    |
| A_55_P2386256 | AK051660     | D130062J10Rik | 319386 | 0,620756046 | 7,778408602 | 0,000761792 |
| A_51_P308681  | NM_001081059 | Mcur1         | 76137  | 0,619323613 | 7,404268817 | 7,18E-06    |
| A_55_P1992959 | NM_173019    | Pfkfb4        | 270198 | 0,61844808  | 9,265677419 | 0,020234965 |
| A_55_P2052166 | NM_029332    | Akap13        | 75547  | 0,61720128  | 7,851053763 | 0,001990026 |
| A_51_P201480  | NM_213659    | Stat3         | 20848  | 0,616842105 | 9,574978495 | 0,004144236 |
| A_51_P267239  | NM_019980    | Litaf         | 56722  | 0,616790896 | 11,50204301 | 0,007882429 |
| A_55_P2007001 | NM_023465    | Ctnnbip1      | 67087  | 0,61678165  | 6,760193548 | 0,002233924 |
| A_52_P507214  | NM_013599    | Mmp9          | 17395  | 0,616587482 | 7,017354839 | 0,005560645 |
| A_51_P175771  | NM_022009    | Flii          | 14248  | 0,615766714 | 8,791333333 | 4,55E-06    |
| A_55_P2020361 | NM_197945    | Lzts3         | 241638 | 0,615709104 | 9,861655914 | 0,049610392 |
| A_52_P161495  | NM_009744    | Bcl6          | 12053  | 0,615424609 | 8,897903226 | 0,000722173 |
| A_51_P261517  | NM_011662    | Tyrobp        | 22177  | 0,615084637 | 11,93805376 | 0,021972147 |
| A_55_P2077866 | NM_010918    | Nktr          | 18087  | 0,614248933 | 8,077967742 | 4,22E-05    |
| A_51_P365409  | NM_028040    | Rpusd4        | 71989  | 0,613819346 | 6,430731183 | 2,58E-15    |
| A_55_P1963868 | NM_153119    | Plekho2       | 102595 | 0,613241821 | 11,41390323 | 0,000356925 |
| A_55_P1981804 | NM_010326    | Gp1ba         | 14723  | 0,613086771 | 8,977043011 | 0,056982713 |
| A_55_P2059606 | NM_019963    | Stat2         | 20847  | 0,611532006 | 8,50127957  | 0,007550013 |
| A_55_P1964664 | NM_139149    | Fus           | 233908 | 0,610147937 | 8,755967742 | 0,012741645 |
| A_51_P165330  | NM_025796    | Mrpl33        | 66845  | 0,610056899 | 10,72652688 | 0,002304948 |
| A_55_P2136752 | NM_029972    | Ernm          | 77767  | 0,609917496 | 8,694258065 | 0,009189887 |
| A_66_P124969  | AK020834     | A930009A15Rik | 77798  | 0,609423186 | 6,403075269 | 0,001691984 |
| A_51_P332201  | NM_009976    | Cst3          | 13010  | 0,608646515 | 12,06472043 | 0,004255398 |
| A_55_P2222870 | NM_139300    | Mylk          | 107589 | 0,608295875 | 6,778967742 | 0,000231969 |
| A_55_P2169445 | NM_133829    | Mfsd6         | 98682  | 0,60799431  | 8,375569892 | 1,22E-06    |
| A_55_P2078088 | NM_001164420 | Pqlc1         | 66943  | 0,60735633  | 8,921956989 | 2,97E-07    |
| A_55_P2049647 | NM_001001892 | H2-K1         | 14972  | 0,607078236 | 11,99494624 | 0,009716064 |
| A_55_P2052799 | NM_009806    | Cask          | 12361  | 0,606997866 | 6,918408602 | 4,51E-05    |
| A_55_P1955717 | NM_008222    | Hccs          | 15159  | 0,605175676 | 14,50253763 | 0,004651428 |
| A_51_P243914  | NM_018773    | Skap2         | 54353  | 0,605088905 | 10,05125806 | 0,001888549 |
| A_51_P460734  | NM_011103    | Prkcd         | 18753  | 0,604890469 | 8,390258065 | 9,08E-05    |
| A_55_P2104572 | NM_144905    | 6330416G13Rik | 230279 | 0,604463727 | 7,270129032 | 0,000655102 |
| A_55_P1954758 | NM_001033217 | Prickle1      | 106042 | 0,603928876 | 6,896913978 | 3,60E-06    |
| A_52_P446457  | NM_001163192 | Ly6g6f        | 433099 | 0,603518492 | 6,912903226 | 0,004176047 |
| A_55_P1956267 | NM_018804    | Syt11         | 229521 | 0,603194879 | 6,850172043 | 2,13E-06    |
| A_52_P681310  | NM_011113    | Plaur         | 18793  | 0,602775249 | 8,468311828 | 0,004155249 |
| A_55_P1980302 | NM_025498    | Psenen        | 66340  | 0,602747511 | 11,26876344 | 0,003630899 |
| A_55_P2058942 | NM_026316    | Aldh3b1       | 67689  | 0,602290896 | 7,673505376 | 0,002124712 |
| A_52_P38964   | NM_001081962 | Sap25         | 751865 | 0,601645092 | 8,250096774 | 5,89E-05    |
| A_52_P467690  | NM_175836    | Sptbn1        | 20742  | 0,601279516 | 7,08727957  | 0,000600054 |
| A_52_P542794  | NM_001002004 | 2610507B11Rik | 72503  | 0,60052276  | 9,568677419 | 0,000215874 |
| A_52_P307761  | NM_010311    | Gnaz          | 14687  | 0,599466572 | 6,647258065 | 0,00023357  |

|               |              |               |           |             |             |             |
|---------------|--------------|---------------|-----------|-------------|-------------|-------------|
| A_55_P2003221 | NM_031247    | Gimap3        | 83408     | 0,599455192 | 9,640827957 | 0,013116293 |
| A_55_P2015426 | NM_133728    | Asnsd1        | 70396     | 0,599206259 | 8,120419355 | 2,15E-08    |
| A_66_P134294  | NM_011667    | Uba1y         | 22202     | 0,599168563 | 7,070494624 | 0,088308042 |
| A_52_P87964   | NM_183423    | Pla2g12a      | 66350     | 0,599098862 | 7,953860215 | 0,007499044 |
| A_51_P258435  | NM_026917    | Zdhhc3        | 69035     | 0,59902845  | 6,772698925 | 0,002985829 |
| A_55_P2088825 | NM_053202    | Foxp1         | 108655    | 0,598963727 | 9,360752688 | 0,011740048 |
| A_55_P1968763 | NM_199022    | Shc4          | 271849    | 0,598888336 | 9,567903226 | 0,064859494 |
| A_55_P2000062 | NM_008390    | Irf1          | 16362     | 0,598738976 | 10,31725806 | 0,012745106 |
| A_55_P2016623 | XM_204772    | Gm5068        | 277089    | 0,598721195 | 8,585086022 | 0,011905493 |
| A_51_P186476  | NM_013612    | Slc11a1       | 18173     | 0,598268137 | 7,934462366 | 0,001034577 |
| A_55_P2035320 | NM_017373    | Nfil3         | 18030     | 0,597849929 | 7,688655914 | 0,001526126 |
| A_55_P2057877 | NM_001163554 | Pou2f2        | 18987     | 0,597758179 | 7,264688172 | 2,14E-05    |
| A_55_P2147101 | NM_013757    | Sytl4         | 27359     | 0,597633001 | 8,887956989 | 0,03473515  |
| A_51_P194628  | NM_173037    | Tango6        | 272538    | 0,597251778 | 10,58254839 | 0,089635711 |
| A_55_P2128734 | NM_146131    | Pbxip1        | 229534    | 0,596578947 | 10,56711828 | 0,000571387 |
| A_51_P127915  | NM_173742    | Rnasek        | 52898     | 0,595705548 | 8,144107527 | 0,000637663 |
| A_51_P479786  | NM_013870    | Smtn          | 29856     | 0,5954367   | 6,927946237 | 0,001229051 |
| A_55_P1988158 | NM_016903    | Esd           | 13885     | 0,59514936  | 11,37808602 | 0,040444486 |
| A_51_P131800  | NM_007806    | Cyba          | 13057     | 0,594654339 | 9,146376344 | 0,00037431  |
| A_55_P2033215 | NM_013877    | Cabp5         | 29865     | 0,592369132 | 9,810505376 | 0,058757204 |
| A_55_P2241299 | NM_001025613 | Otud7b        | 229603    | 0,591697724 | 7,298129032 | 0,003503358 |
| A_55_P1996862 | NM_011190    | Psme2         | 19188     | 0,591423898 | 11,85627957 | 0,000848042 |
| A_51_P218774  | NM_026418    | Rgs10         | 67865     | 0,591131579 | 12,28573118 | 0,004655977 |
| A_51_P206346  | NM_178606    | Reep3         | 28193     | 0,59094808  | 7,789795699 | 2,42E-05    |
| A_55_P2070352 | NM_007782    | Csf3r         | 12986     | 0,590184922 | 12,64345161 | 0,001082574 |
| A_51_P413147  | NM_008693    | Klk1b3        | 18050     | 0,589777383 | 6,563548387 | 0,08909529  |
| A_51_P440743  | NM_009886    | Celsr1        | 12614     | 0,589756757 | 6,512268817 | 5,86E-07    |
| A_55_P1967533 | NR_003623    | Gm5069        | 277333    | 0,589512802 | 8,783548387 | 0,00021884  |
| A_55_P2100824 | XM_992161    | LOC676689     | 676689    | 0,589299431 | 11,57848387 | 0,029477728 |
| A_55_P2094901 | AK046118     | Phyhd1        | 227696    | 0,589153627 | 14,85047312 | 0,003638857 |
| A_51_P350817  | NM_009922    | Cnn1          | 12797     | 0,588987198 | 6,718182796 | 0,026678189 |
| A_51_P425048  | NM_010392    | H2-Q2         | 15013     | 0,588651494 | 10,67149462 | 0,01115472  |
| A_55_P2045258 | NM_010119    | Ehd1          | 13660     | 0,588622333 | 8,050892473 | 0,007919634 |
| A_51_P399985  | NM_015742    | Myo9b         | 17925     | 0,588433144 | 9,398741935 | 0,000400715 |
| A_51_P121447  | NM_054099    | 1110038F14Rik | 117171    | 0,588386202 | 7,891967742 | 4,62E-05    |
| A_55_P2154595 | NM_017404    | Mrpl39        | 27393     | 0,588113798 | 7,012172043 | 6,95E-08    |
| A_55_P2144597 | NM_001123370 | 9030025P20Rik | 100041574 | 0,58790256  | 6,834688172 | 0,00014071  |
| A_55_P1976224 | NM_021273    | Ckb           | 12709     | 0,587766003 | 6,682526882 | 0,000174386 |
| A_51_P436727  | NM_177231    | Arrb1         | 109689    | 0,587256046 | 9,973752688 | 0,000703626 |
| A_55_P2030433 | NM_008155    | Gpi1          | 14751     | 0,586677098 | 11,16687097 | 0,011492255 |
| A_52_P679101  | NM_011597    | Tjp2          | 21873     | 0,586455903 | 6,987010753 | 0,000705307 |
| A_52_P515036  | NM_016865    | Htatip2       | 53415     | 0,585741821 | 6,755021505 | 2,64E-05    |
| A_55_P2142251 | NM_054045    | Hist2h3c2     | 97114     | 0,585376956 | 6,590731183 | 0,000263648 |
| A_55_P2040539 | NM_172618    | Btbd9         | 224671    | 0,584751778 | 6,474602151 | 4,55E-06    |
| A_55_P2146127 | NM_029362    | Chmp4b        | 75608     | 0,584039118 | 8,624666667 | 1,27E-06    |
| A_55_P2165869 | NM_009883    | Cebpb         | 12608     | 0,583613087 | 9,776064516 | 0,023466055 |
| A_55_P1994032 | NM_013842    | Xbp1          | 22433     | 0,582573969 | 9,521290323 | 0,00089868  |
| A_65_P03442   | NM_008828    | Pgk1          | 18655     | 0,581388336 | 9,426978495 | 3,28E-05    |
| A_55_P2065829 | NM_199017    | 9230110C19Rik | 234912    | 0,580600284 | 11,39919355 | 0,003433435 |
| A_52_P683306  | NM_146084    | Fam13b        | 225358    | 0,580599573 | 7,351666667 | 8,63E-05    |

|               |              |          |           |             |              |             |
|---------------|--------------|----------|-----------|-------------|--------------|-------------|
| A_52_P276792  | NM_053202    | Foxp1    | 108655    | 0,580561166 | 7,926215054  | 0,001336057 |
| A_52_P408757  | NM_010188    | Fcgr3    | 14131     | 0,580378378 | 8,028806452  | 0,000843654 |
| A_51_P426754  | NM_009673    | Anxa5    | 11747     | 0,580157895 | 8,963473118  | 0,001456664 |
| A_55_P2139027 | NM_001163540 | Plec     | 18810     | 0,580027027 | 8,952526882  | 0,00394846  |
| A_55_P2039878 | NM_010327    | Gp1bb    | 14724     | 0,579960882 | 6,739526882  | 0,000619328 |
| A_55_P2140212 | XM_001474216 | Gm2627   | 100040148 | 0,579082504 | 11,71482796  | 0,043714282 |
| A_55_P2066778 | NM_206536    | AB124611 | 382062    | 0,578525605 | 8,13027957   | 0,000933913 |
| A_52_P676956  | NM_054096    | Tirap    | 117149    | 0,578042674 | 6,727526882  | 1,83E-05    |
| A_55_P2105888 | NM_175935    | G6pc3    | 68401     | 0,577359175 | 7,492193548  | 1,98E-05    |
| A_55_P2143233 | NM_011242    | Rasgrp2  | 19395     | 0,577113798 | 10,24841935  | 0,006961555 |
| A_51_P156274  | NM_010736    | Ltbr     | 17000     | 0,577071124 | 7,855806452  | 0,00068834  |
| A_55_P1999349 | NM_027722    | Nudt4    | 71207     | 0,576644381 | 9,155677419  | 0,003856848 |
| A_51_P151126  | NM_013706    | Cd52     | 23833     | 0,576455192 | 12,75952688  | 0,011738919 |
| A_51_P148069  | NM_001134829 | Lpgat1   | 226856    | 0,576293741 | 6,898924731  | 2,84E-05    |
| A_51_P347862  | NM_134156    | Actn1    | 109711    | 0,576223329 | 6,857763441  | 3,86E-05    |
| A_51_P421664  | NM_133739    | Tmem123  | 71929     | 0,57598293  | 8,983677419  | 0,002510543 |
| A_55_P1964068 | NM_144793    | Slc25a38 | 208638    | 0,5758101   | 8,434645161  | 2,98E-06    |
| A_51_P115326  | NM_011512    | Surf4    | 20932     | 0,574277383 | 8,879215054  | 0,000295417 |
| A_51_P457528  | NM_007630    | Ccnb2    | 12442     | 0,574108108 | 8,315817204  | 0,005679216 |
| A_51_P153170  | NM_029787    | Cyb5r3   | 109754    | 0,574046942 | 7,641505376  | 0,000115079 |
| A_51_P309158  | NM_027840    | Snx20    | 71607     | 0,574007112 | 10,431       | 0,002341089 |
| A_55_P1978506 | NM_207648    | H2-Q6    | 110557    | 0,573698435 | 11,473333333 | 0,016517707 |
| A_55_P2131379 | M60419       | Ybx1     | 22608     | 0,573682077 | 8,707215054  | 0,000379098 |
| A_51_P453351  | NM_172266    | Lpgat1   | 226856    | 0,573677098 | 7,328526882  | 9,93E-05    |
| A_51_P277336  | NM_138741    | Sdpr     | 20324     | 0,573472973 | 10,23631183  | 0,085625863 |
| A_51_P369628  | NM_133949    | Ptov1    | 84113     | 0,573288051 | 6,483322581  | 3,07E-10    |
| A_51_P499698  | NM_026414    | Asprv1   | 67855     | 0,573217639 | 8,51316129   | 0,058676714 |
| A_55_P2151273 | NM_001039176 | Elovl1   | 54325     | 0,57320128  | 9,509043011  | 0,000808877 |
| A_55_P2036280 | NM_001128605 | Psen2    | 19165     | 0,572349218 | 8,00783871   | 0,001471261 |
| A_52_P358349  | NM_026002    | Mtdh     | 67154     | 0,57209175  | 8,840107527  | 0,000731572 |
| A_55_P2129291 | NM_146114    | Dclre1c  | 227525    | 0,571458037 | 6,998655914  | 0,000214992 |
| A_52_P148514  | NM_152803    | Hpse     | 15442     | 0,571428876 | 6,782053763  | 9,04E-05    |
| A_51_P336161  | NM_010764    | Man2b1   | 17159     | 0,571204836 | 9,717086022  | 0,000594345 |
| A_55_P1997275 | NM_133216    | Xpnpep1  | 170750    | 0,570501422 | 9,323        | 0,016227307 |
| A_55_P2124273 | NM_053214    | Myo1f    | 17916     | 0,570404694 | 8,852344086  | 0,010486795 |
| A_55_P2125049 | AB359227     | Gm11127  | 100529082 | 0,570229018 | 12,1182043   | 0,015363595 |
| A_55_P1992208 | NM_008155    | Gpi1     | 14751     | 0,570031294 | 11,02373118  | 0,010437864 |
| A_55_P2001233 | NM_001162938 | Pydc3    | 100033459 | 0,569762447 | 8,769569892  | 0,056362505 |
| A_55_P2083997 | NM_001081750 | Zfp664   | 269704    | 0,569330725 | 8,486752688  | 0,013594135 |
| A_55_P2007500 | NM_001013749 | Tmem151b | 210573    | 0,568934566 | 6,59127957   | 0,000220487 |
| A_55_P2024431 | NM_008064    | Gaa      | 14387     | 0,56886771  | 7,423752688  | 0,000444355 |
| A_55_P2061737 | NM_021278    | Tmsb4x   | 19241     | 0,568630156 | 16,36377419  | 0,006234557 |
| A_55_P2041121 | NR_002841    | Rn4.5s   | 19799     | 0,567369132 | 14,7926129   | 0,000249672 |
| A_51_P342669  | NM_023418    | Pgam1    | 18648     | 0,567322902 | 9,204365591  | 0,001128078 |
| A_55_P2117525 | NM_001166410 | Rbm3     | 19652     | 0,56666643  | 9,500053763  | 0,003629601 |
| A_55_P2108690 | NR_033633    | Gm8709   | 667572    | 0,566482219 | 8,529591398  | 0,000329889 |
| A_55_P2166501 | NM_009851    | Cd44     | 12505     | 0,566144381 | 8,440322581  | 0,002437626 |
| A_52_P600318  | NM_022813    | Scamp2   | 24044     | 0,56613229  | 8,422365591  | 1,12E-05    |
| A_51_P346668  | NM_012057    | Irf5     | 27056     | 0,565999289 | 7,62783871   | 1,80E-05    |
| A_52_P426740  | NM_023635    | Rab27a   | 11891     | 0,565544808 | 6,54816129   | 2,15E-08    |

|               |              |               |           |             |             |             |
|---------------|--------------|---------------|-----------|-------------|-------------|-------------|
| A_55_P2036567 | NM_011691    | Vav1          | 22324     | 0,565163585 | 10,41175269 | 0,002223083 |
| A_55_P2019083 | NM_001114334 | Rps6kb1       | 72508     | 0,564058321 | 8,524978495 | 6,51E-05    |
| A_65_P03728   | NM_009177    | St3gal1       | 20442     | 0,563275249 | 10,81588172 | 0,016484452 |
| A_55_P1983448 | NM_011311    | S100a4        | 20198     | 0,563160028 | 10,52352688 | 0,03891614  |
| A_52_P354744  | NM_011401    | Slc2a3        | 20527     | 0,563044097 | 10,38764516 | 0,036314007 |
| A_52_P456134  | NM_010046    | Dgat1         | 13350     | 0,562276671 | 6,992139785 | 0,00012061  |
| A_55_P2022434 | NM_008155    | Gpi1          | 14751     | 0,56190825  | 11,10021505 | 0,010093031 |
| A_55_P2305010 | AK043374     | A730089K16Rik | 320411    | 0,561872688 | 8,083870968 | 0,048222622 |
| A_55_P2149763 | NM_001025313 | Tapbp         | 21356     | 0,561794452 | 9,659913978 | 0,000737984 |
| A_52_P243249  | NM_011952    | Mapk3         | 26417     | 0,561519203 | 9,195010753 | 1,83E-05    |
| A_51_P223443  | NM_133655    | Cd81          | 12520     | 0,561429587 | 10,62862366 | 0,034643183 |
| A_55_P2083982 | NM_013811    | Dnah8         | 13417     | 0,560369844 | 6,588569892 | 2,32E-05    |
| A_52_P350664  | NM_153781    | Pygb          | 110078    | 0,560327169 | 7,226956989 | 6,08E-05    |
| A_55_P2130975 | NM_010881    | Ncoa1         | 17977     | 0,559389047 | 8,179       | 0,004095683 |
| A_55_P2115068 | NM_011186    | Psmb5         | 19173     | 0,559332148 | 9,090849462 | 1,51E-05    |
| A_55_P2021011 | NM_030207    | Sfi1          | 78887     | 0,558535562 | 6,634741935 | 6,96E-05    |
| A_51_P393426  | NM_011173    | Pros1         | 19128     | 0,558440967 | 7,659666667 | 0,002854605 |
| A_51_P495581  | NM_030682    | Tlr1          | 21897     | 0,557391181 | 7,168989247 | 0,000274813 |
| A_55_P2014511 | NM_007444    | Amd2          | 100041585 | 0,55683926  | 7,711129032 | 0,0022442   |
| A_51_P362054  | NM_025983    | Atp5e         | 67126     | 0,556483642 | 11,76168817 | 4,51E-05    |
| A_51_P117618  | NM_023154    | Ethe1         | 66071     | 0,555704836 | 7,601752688 | 2,06E-06    |
| A_65_P18433   | NM_001024604 | Ankrd28       | 105522    | 0,555539829 | 7,075516129 | 9,63E-05    |
| A_55_P1991134 | NM_008019    | Fkbp1a        | 14225     | 0,555147937 | 10,1322043  | 0,011556651 |
| A_55_P1990548 | NM_145476    | Tbc1d22a      | 223754    | 0,554889758 | 8,942946237 | 0,002476767 |
| A_55_P2045026 | NM_029657    | Mgrn1         | 17237     | 0,554624467 | 8,806419355 | 0,000732854 |
| A_52_P327664  | NM_153564    | Gbp5          | 229898    | 0,554463727 | 7,481344086 | 0,013052799 |
| A_51_P121891  | NM_009008    | Rac2          | 19354     | 0,554320057 | 10,86591398 | 0,009578913 |
| A_66_P124549  | NM_001159551 | H13           | 14950     | 0,553766714 | 9,667       | 0,003011732 |
| A_55_P2091551 | NM_146011    | Arhgap9       | 216445    | 0,553176387 | 10,45968817 | 0,005985323 |
| A_65_P19784   | NM_080443    | Asb7          | 117589    | 0,552475818 | 7,019709677 | 0,000961593 |
| A_55_P1996299 | NM_001039055 | Pofut1        | 140484    | 0,552451636 | 7,928795699 | 2,89E-07    |
| A_55_P2107347 | NM_013835    | Trove2        | 20822     | 0,552412518 | 7,548817204 | 0,001857698 |
| A_51_P220135  | NM_016791    | Nfatc1        | 18018     | 0,551748222 | 7,089709677 | 1,13E-05    |
| A_51_P503542  | NM_026712    | Zfp414        | 328801    | 0,551384068 | 7,998946237 | 0,000192287 |
| A_51_P203675  | NM_021407    | Trem3         | 58218     | 0,550754623 | 7,221655914 | 0,000611767 |
| A_55_P2143516 | XM_001473058 | Gm2291        | 100039527 | 0,550509957 | 7,701408602 | 0,007609952 |
| A_55_P1997509 | NM_021397    | Zbtb32        | 58206     | 0,55028165  | 6,86927957  | 0,00090985  |
| A_51_P437144  | NM_026556    | Dynll2        | 68097     | 0,550237553 | 7,310612903 | 5,07E-06    |
| A_51_P155313  | NM_010362    | Gsto1         | 14873     | 0,549814367 | 10,16211828 | 0,094410379 |
| A_55_P2143204 | NM_146131    | Pbxip1        | 229534    | 0,549665718 | 7,935       | 0,000164217 |
| A_55_P1972605 | NM_009631    | Adora3        | 11542     | 0,548035562 | 6,829387097 | 0,004708322 |
| A_51_P449325  | NM_008206    | H2-Oa         | 15001     | 0,547750356 | 8,605107527 | 0,000749504 |
| A_51_P199608  | NM_178869    | Ttll1         | 319953    | 0,547571124 | 6,771333333 | 9,96E-05    |
| A_55_P2183597 | NM_198664    | Tbc1d2        | 381605    | 0,547416074 | 6,993473118 | 0,003531413 |
| A_52_P279425  | NM_032465    | Cd96          | 84544     | 0,546596017 | 7,256978495 | 0,000104879 |
| A_55_P1994175 | NM_027351    | Ppil3         | 70225     | 0,54605192  | 8,045913978 | 0,002258409 |
| A_55_P2016462 | NM_021274    | Cxcl10        | 15945     | 0,545788762 | 7,262967742 | 0,029822826 |
| A_55_P2048912 | NM_001033308 | Themis2       | 230787    | 0,545628734 | 8,115419355 | 0,001687306 |
| A_51_P344947  | NM_029576    | Rab1b         | 76308     | 0,545497155 | 9,245946237 | 5,12E-05    |
| A_66_P110633  | NM_001168660 | Apol9b        | 71898     | 0,544085349 | 6,591086022 | 0,011699188 |

|               |              |                |           |             |             |             |
|---------------|--------------|----------------|-----------|-------------|-------------|-------------|
| A_55_P1982737 | NM_016775    | Dnajc5         | 13002     | 0,543352063 | 13,41687097 | 0,007951453 |
| A_55_P1954092 | XM_001473985 | Gm2563         | 100040034 | 0,543285206 | 12,41134409 | 0,019927869 |
| A_55_P2114269 | NM_001100116 | 1700047I17Rik2 | 100101807 | 0,542911095 | 15,5902043  | 0,01184041  |
| A_51_P150722  | NM_010748    | Lyst           | 17101     | 0,542852063 | 6,580473118 | 1,40E-05    |
| A_51_P258620  | NM_029391    | Rab4b          | 19342     | 0,542667141 | 7,252483871 | 1,67E-08    |
| A_55_P1987914 | NM_008696    | Map4k4         | 26921     | 0,542567568 | 7,50572043  | 2,12E-06    |
| A_52_P282741  | NM_011520    | Sdc3           | 20970     | 0,542357752 | 6,647290323 | 0,00038522  |
| A_55_P2011678 | NM_001164557 | Pdzk1ip1       | 67182     | 0,542207681 | 10,84311828 | 0,026943174 |
| A_51_P295192  | NM_010907    | Nfkbia         | 18035     | 0,541981508 | 10,47056989 | 0,015224308 |
| A_51_P202050  | NM_008052    | Dtx1           | 14357     | 0,541535562 | 8,906215054 | 0,021634454 |
| A_66_P113487  | NM_011862    | Pacsin2        | 23970     | 0,541211238 | 10,27895699 | 0,01508196  |
| A_66_P104815  | NM_007899    | Ecm1           | 13601     | 0,540882646 | 7,921537634 | 0,021713043 |
| A_55_P2070241 | NM_016703    | Preb           | 50907     | 0,540378378 | 9,095978495 | 0,006008627 |
| A_55_P2005753 | NM_026968    | Manbal         | 69161     | 0,538731152 | 6,76872043  | 1,79E-07    |
| A_55_P2069721 | NM_031165    | Hspa8          | 15481     | 0,53801138  | 11,35551613 | 0,02668826  |
| A_51_P293688  | NM_026405    | Rab32          | 67844     | 0,53794239  | 7,623408602 | 0,001108376 |
| A_55_P2076489 | NM_009007    | Rac1           | 19353     | 0,537767425 | 11,2317957  | 0,000504461 |
| A_51_P183995  | NM_019458    | Paf1           | 54624     | 0,537619488 | 7,979204301 | 8,07E-05    |
| A_52_P609109  | NM_145823    | Pitpnc1        | 71795     | 0,537607397 | 6,757247312 | 3,44E-05    |
| A_55_P2037081 | NM_145078    | 2610305D13Rik  | 112422    | 0,537400427 | 6,729924731 | 0,016298209 |
| A_52_P66371   | NM_178420    | Nlrx1          | 270151    | 0,537253201 | 8,134860215 | 0,045129523 |
| A_66_P126138  | NM_010881    | Ncoa1          | 17977     | 0,536894737 | 7,344311828 | 0,000780916 |
| A_55_P1987245 | NM_011740    | Ywhaz          | 22631     | 0,536832148 | 7,830946237 | 0,002781059 |
| A_55_P2154107 | NM_008103    | Gcm1           | 14531     | 0,536755334 | 9,580043011 | 0,052986167 |
| A_52_P570266  | NM_013640    | Psmb10         | 19171     | 0,53665505  | 10,54375269 | 0,019553942 |
| A_55_P2018847 | NM_001164735 | Crlf2          | 57914     | 0,535138691 | 10,39544086 | 0,00391497  |
| A_55_P2080603 | NM_031165    | Hspa8          | 15481     | 0,535102418 | 13,47156989 | 0,044896681 |
| A_55_P1983006 | NM_001077696 | Hdac5          | 15184     | 0,535009957 | 10,49107527 | 0,000344283 |
| A_51_P495242  | NM_010689    | Lat            | 16797     | 0,533950213 | 9,471021505 | 0,024338    |
| A_51_P357341  | NM_033444    | Clic1          | 114584    | 0,533771693 | 11,48877419 | 0,001335444 |
| A_55_P1993064 | NM_033072    | Mbd6           | 110962    | 0,533498578 | 8,062451613 | 3,90E-05    |
| A_55_P2136572 | NM_178626    | Cdc42se2       | 72729     | 0,53348293  | 8,632860215 | 9,83E-05    |
| A_55_P1956687 | NM_001163753 | Rab37          | 58222     | 0,533347795 | 7,867752688 | 4,92E-07    |
| A_55_P1976754 | NM_008907    | Ppia           | 268373    | 0,532390469 | 13,69156989 | 0,001331077 |
| A_51_P262171  | NM_008326    | Irgm1          | 15944     | 0,53227596  | 9,173741935 | 0,020260653 |
| A_55_P1953489 | NM_001033550 | Lrrc8b         | 433926    | 0,532261735 | 7,123204301 | 0,006800532 |
| A_55_P1965416 | NM_015731    | Atp9a          | 11981     | 0,532151494 | 7,811537634 | 0,046286344 |
| A_51_P247359  | NM_016933    | Ptprcap        | 19265     | 0,531981508 | 11,0236129  | 0,056363845 |
| A_55_P2076871 | AK083328     | Lef1           | 16842     | 0,531921764 | 10,72935484 | 0,030007898 |
| A_55_P2136501 | NM_021565    | Midn           | 59090     | 0,53178734  | 9,013774194 | 0,001994909 |
| A_51_P311904  | NM_172498    | Ptk2b          | 19229     | 0,53163798  | 8,609129032 | 8,09E-05    |
| A_55_P2102322 | NM_029887    | Yif1b          | 77254     | 0,531418208 | 8,372322581 | 0,000592468 |
| A_55_P2030080 | NM_001017426 | Kdm6b          | 216850    | 0,531390469 | 7,611774194 | 0,000676365 |
| A_55_P1968789 | NM_009025    | Rasa3          | 19414     | 0,530734708 | 11,25098925 | 0,009739905 |
| A_52_P653966  | NM_019426    | Atf7ip         | 54343     | 0,53062091  | 7,549688172 | 0,000272932 |
| A_55_P2022082 | NM_021366    | Klf13          | 50794     | 0,530061878 | 8,71055914  | 0,005471333 |
| A_55_P1978618 | NM_013535    | Grcc10         | 14790     | 0,529376245 | 10,25764516 | 0,000210563 |
| A_52_P370311  | NM_023625    | Plbd2          | 71772     | 0,52929303  | 7,292       | 0,00038629  |
| A_55_P2035877 | NM_001190445 | 2610002J02Rik  | 67513     | 0,529084637 | 8,004623656 | 6,53E-06    |
| A_51_P140321  | NM_026779    | Mocos          | 68591     | 0,528963727 | 7,202053763 | 0,000673794 |



|               |              |               |           |             |             |             |             |
|---------------|--------------|---------------|-----------|-------------|-------------|-------------|-------------|
| A_52_P46419   | NM_001038018 | Grk6          | 26385     | 0,528366999 | 8,405       | 5,48E-05    |             |
| A_51_P464918  | NM_019453    | Mefv          | 54483     | 0,528274538 | 8,592505376 | 0,022985724 |             |
| A_51_P246653  | NM_020008    | Clec7a        | 56644     | 0,527485775 | 10,36019355 | 0,076184692 |             |
| A_51_P519276  | NM_025843    | Ndufb7        | 66916     | 0,527458037 | 10,13164516 | 0,000114723 |             |
| A_55_P1980267 | NM_172257    | Sidt2         | 214597    | 0,527353485 | 8,966193548 | 0,001232832 |             |
| A_55_P2040838 | NM_001166672 | Gm14548       | 100038909 | 0,527100996 | 9,139150538 | 0,038915775 |             |
| A_51_P487360  | NM_016677    | Hpcal1        | 53602     | 0,526288762 | 8,777451613 | 0,007854051 |             |
| A_55_P2009861 | XM_001472138 | Gm2015        | 100039039 | 0,526165718 | 10,00830108 | 0,009006874 |             |
| A_51_P203182  | NM_138310    | Apobr         | 171504    | 0,525849929 | 7,522365591 | 0,002592016 |             |
| A_51_P220993  | NM_011072    | Pfn1          | 18643     | 0,525583926 | 9,806311828 | 0,00330134  |             |
| A_51_P479808  | NM_027418    | Mapk6         | 50772     | 0,525233997 | 7,202086022 | 0,001843117 |             |
| A_55_P1979463 | NM_012021    | Prdx5         | 54683     | 0,525133713 | 9,988795699 | 0,026293741 |             |
| A_55_P2041961 | NM_007553    | Bmp2          | 12156     | 0,525048364 | 6,767569892 | 0,046247492 |             |
| A_55_P2074776 | XM_993473    | Gm8894        | 667952    | 0,524285917 | 15,86175269 | 0,001125687 |             |
| A_51_P303238  | NM_026775    | Tmed10        | 68581     | 0,523897582 | 8,725075269 | 0,000200315 |             |
| A_55_P2060966 | NM_001163440 | Mov10         | 17454     | 0,52384495  | 8,648086022 | 0,002776116 |             |
| A_55_P2037692 | NM_001033403 | Gm1968        | 328657    | 0,523758179 | 7,113806452 | 0,001003753 |             |
| A_55_P2002517 | NM_001077361 | Fhl1          | 14199     | 0,523592461 | 7,045043011 | 0,001494524 |             |
| A_55_P1988882 | NM_001113487 |               | Sep 09    | 53860       | 0,523111664 | 8,571870968 | 0,001713975 |
| A_55_P2192961 | NM_175648    | Trim30b       | 244183    | 0,522957326 | 6,966537634 | 0,003326244 |             |
| A_52_P422494  | NM_145634    | Cd300lf       | 246746    | 0,522738265 | 9,543258065 | 0,092178753 |             |
| A_51_P111259  | NM_026373    | Cdk2ap2       | 52004     | 0,522607397 | 10,03231183 | 0,012849492 |             |
| A_51_P212782  | NM_008361    | Il1b          | 16176     | 0,52254623  | 9,662       | 0,07589499  |             |
| A_55_P2077618 | NM_172753    | Csgalnact1    | 234356    | 0,521876245 | 7,900677419 | 0,044823844 |             |
| A_55_P1971074 | NM_015804    | Atp11a        | 50770     | 0,521585349 | 7,172182796 | 0,011335298 |             |
| A_51_P189361  | NM_027950    | Osgin1        | 71839     | 0,521545519 | 7,718677419 | 0,000795711 |             |
| A_55_P2128263 | NM_001109691 | Phf21a        | 192285    | 0,521417496 | 8,40183871  | 0,000166969 |             |
| A_51_P419246  | NR_028427    | 5830416P10Rik | 381232    | 0,521257468 | 8,279290323 | 0,04357227  |             |
| A_55_P1964364 | NM_001012434 | Kctd14        | 233529    | 0,520650782 | 17,07586022 | 0,001608986 |             |
| A_51_P148355  | NM_175433    | Zfp710        | 209225    | 0,520030583 | 8,658419355 | 0,007755011 |             |
| A_51_P416556  | NM_026155    | Ssr3          | 67437     | 0,520009957 | 8,676139785 | 0,000291818 |             |
| A_55_P2046338 | NM_001168514 | Mapk14        | 26416     | 0,519926031 | 9,318967742 | 0,000239453 |             |
| A_51_P146753  | NM_007781    | Csf2rb2       | 12984     | 0,519590327 | 8,55727957  | 0,006511755 |             |
| A_55_P2391619 | BG063913     | Al449595      | 58901     | 0,519465149 | 6,490548387 | 0,039894512 |             |
| A_55_P2035937 | NM_001163663 | Rab6a         | 19346     | 0,519413229 | 9,686086022 | 0,004002666 |             |
| A_55_P2033510 | NM_198931    | Ppm1m         | 67905     | 0,518882646 | 8,296032258 | 0,000365199 |             |
| A_55_P2146749 | NM_026533    | Rps13         | 68052     | 0,518522048 | 12,86290323 | 0,08713159  |             |
| A_55_P1954986 | NM_007922    | Elk1          | 13712     | 0,518438122 | 16,84773118 | 0,002598426 |             |
| A_55_P2095177 | NM_013700    | Usp5          | 22225     | 0,518130156 | 9,066591398 | 0,000457836 |             |
| A_55_P2074536 | NM_011151    | Ppm1b         | 19043     | 0,517985775 | 9,096634409 | 0,000254486 |             |
| A_51_P233603  | NM_011969    | Psma7         | 26444     | 0,517922475 | 9,701741935 | 0,001581864 |             |
| A_52_P346458  | NM_023764    | Tollip        | 54473     | 0,517546942 | 8,390548387 | 0,044887345 |             |
| A_66_P120567  | NM_010730    | Anxa1         | 16952     | 0,517461593 | 8,963322581 | 0,062285192 |             |
| A_55_P1959595 | NM_001161765 | Fmo5          | 14263     | 0,515570413 | 7,336344086 | 0,010349632 |             |
| A_55_P2133266 | NM_028375    | Cxx1c         | 72865     | 0,515509246 | 9,515032258 | 0,001714968 |             |
| A_52_P467389  | NM_023044    | Slc15a3       | 65221     | 0,515460882 | 7,277204301 | 0,002767192 |             |
| A_55_P1955239 | NM_009096    | Rps6          | 20104     | 0,51521266  | 11,81832258 | 0,003813044 |             |
| A_55_P1960924 | NM_053208    | Egln2         | 112406    | 0,514892603 | 10,16222581 | 0,002798733 |             |
| A_55_P2005570 | NM_010160    | Celf2         | 14007     | 0,513870555 | 9,473096774 | 0,002469656 |             |
| A_52_P142208  | NM_023423    | Akirin1       | 68050     | 0,513364865 | 8,606483871 | 2,61E-06    |             |

|               |              |               |           |             |             |             |
|---------------|--------------|---------------|-----------|-------------|-------------|-------------|
| A_55_P2086885 | NM_001033219 | Slc45a4       | 106068    | 0,513157895 | 6,74716129  | 0,000221332 |
| A_51_P143200  | NM_153523    | Tcstv3        | 236219    | 0,513113087 | 6,452967742 | 0,000760516 |
| A_51_P345663  | NM_024281    | Rrbp1         | 81910     | 0,512018492 | 7,669096774 | 0,000216372 |
| A_55_P2082733 | NM_007807    | Cybb          | 13058     | 0,511999289 | 6,797870968 | 7,45E-05    |
| A_55_P2042823 | NM_001145859 | Sh3bp2        | 24055     | 0,510982219 | 8,280430108 | 0,003640645 |
| A_55_P2095342 | NM_001177302 | Rara          | 19401     | 0,510864865 | 8,263494624 | 0,004437913 |
| A_55_P2171459 | NM_009145    | Nptn          | 20320     | 0,509667141 | 7,469225806 | 0,003575176 |
| A_52_P114722  | NM_001077705 | Ptpn6         | 15170     | 0,509540541 | 9,72944086  | 0,00673409  |
| A_55_P1993864 | NM_008507    | Sh2b3         | 16923     | 0,50951138  | 7,67783871  | 5,26E-08    |
| A_51_P394802  | NM_026640    | Fam111a       | 107373    | 0,509503556 | 7,757043011 | 3,35E-05    |
| A_55_P2151609 | NM_011436    | Sorl1         | 20660     | 0,509112376 | 9,040258065 | 0,040831942 |
| A_55_P2096257 | NM_010860    | Myl6          | 17904     | 0,509002845 | 14,95011828 | 0,000464772 |
| A_51_P217047  | NM_025277    | Gng10         | 14700     | 0,508911095 | 7,728150538 | 5,94E-05    |
| A_55_P2069850 | NM_011123    | Plp1          | 18823     | 0,508352063 | 8,829021505 | 0,060957391 |
| A_55_P1960936 | XM_001473982 | Gm2562        | 100040033 | 0,508349929 | 12,40744086 | 0,024338    |
| A_55_P2158990 | NM_010591    | Jun           | 16476     | 0,508275249 | 7,41711828  | 0,008452902 |
| A_52_P222725  | NM_026148    | Lims1         | 110829    | 0,508237553 | 9,409193548 | 0,024223257 |
| A_55_P1999648 | NM_007408    | Plin2         | 11520     | 0,507820057 | 8,098913978 | 0,008470269 |
| A_51_P144349  | NM_172442    | Dtx4          | 207521    | 0,50748293  | 6,627172043 | 4,19E-08    |
| A_52_P748958  | NM_007687    | Cfl1          | 12631     | 0,50733926  | 12,21974194 | 3,70E-06    |
| A_55_P2093665 | XM_001478701 | Gm3950        | 100042656 | 0,506302276 | 8,028548387 | 0,009810599 |
| A_52_P179068  | NM_017469    | Gucy1b3       | 54195     | 0,506275249 | 7,742526882 | 0,021282591 |
| A_52_P1197913 | NM_008655    | Gadd45b       | 17873     | 0,506225462 | 7,712645161 | 0,000308519 |
| A_51_P475995  | NM_178060    | Thra          | 21833     | 0,506172119 | 7,220129032 | 0,000211508 |
| A_51_P327121  | NM_009515    | Was           | 22376     | 0,505534851 | 9,354043011 | 0,000101299 |
| A_51_P378298  | NM_026976    | Faim3         | 69169     | 0,505219772 | 9,612634409 | 0,058328868 |
| A_51_P278550  | NM_134118    | Tecr          | 106529    | 0,50466074  | 7,981505376 | 6,07E-06    |
| A_55_P2137203 | NM_020579    | B4galt3       | 57370     | 0,503834993 | 8,661795699 | 0,006480235 |
| A_55_P1963491 | NM_008972    | Ptma          | 19231     | 0,503763158 | 8,936580645 | 0,003901726 |
| A_52_P78023   | NM_172397    | Limd2         | 67803     | 0,503620199 | 12,58967742 | 0,010347513 |
| A_55_P2007510 | NM_026441    | Pef1          | 67898     | 0,503529872 | 9,092763441 | 0,000393064 |
| A_51_P486001  | NM_172457    | Mob3a         | 208228    | 0,503418208 | 8,062043011 | 6,34E-06    |
| A_51_P501453  | NM_022430    | Ms4a8a        | 64381     | 0,503273115 | 6,68655914  | 0,001515818 |
| A_55_P1992257 | NM_007457    | Ap1s1         | 11769     | 0,503266714 | 9,076817204 | 3,05E-06    |
| A_52_P70796   | NM_007551    | Cxcr5         | 12145     | 0,503146515 | 7,935774194 | 0,00852497  |
| A_66_P124551  | NM_029332    | Akap13        | 75547     | 0,502800142 | 9,141182796 | 0,005175143 |
| A_52_P113700  | NM_027324    | Sfxn1         | 14057     | 0,502614509 | 8,088666667 | 0,00012002  |
| A_55_P2033557 | AB041803     | Lincpint      | 232685    | 0,502368421 | 7,212365591 | 0,000678115 |
| A_55_P1956063 | NM_026701    | Pbld1         | 68371     | 0,502292319 | 15,68898925 | 0,022909146 |
| A_55_P2033530 | NR_023357    | Gm6981        | 629557    | 0,502256046 | 7,27211828  | 0,0001185   |
| A_55_P2031668 | NM_013541    | Gstp1         | 14870     | 0,50222973  | 8,057623656 | 0,001222547 |
| A_52_P479500  | NM_008942    | Npepps        | 19155     | 0,502024893 | 7,16188172  | 8,81E-06    |
| A_55_P2049752 | NM_173749    | Pamr1         | 210622    | 0,501566145 | 6,665043011 | 0,032420423 |
| A_66_P122086  | NM_001039720 | 9030619P08Rik | 105892    | 0,50155761  | 7,91272043  | 0,040590763 |
| A_55_P2005555 | NM_001110229 | Celf2         | 14007     | 0,501554054 | 7,118086022 | 4,63E-05    |
| A_52_P191975  | NM_001003934 | Rtn3          | 20168     | 0,501479374 | 7,781763441 | 0,004178977 |
| A_55_P2033420 | NM_023220    | Sppl2a        | 66552     | 0,50133357  | 7,730752688 | 0,000299954 |
| A_51_P401964  | NM_146104    | Aph1a         | 226548    | 0,501165007 | 7,44088172  | 5,05E-05    |
| A_55_P2188464 | NM_029166    | Uhrf1bp1l     | 75089     | 0,501128734 | 7,565010753 | 0,000128856 |
| A_55_P2174490 | NM_007645    | Cd37          | 12493     | 0,500890469 | 8,014505376 | 0,000392941 |

|               |              |               |           |              |             |             |
|---------------|--------------|---------------|-----------|--------------|-------------|-------------|
| A_51_P385718  | NM_026862    | Cd177         | 68891     | 0,500721195  | 6,462107527 | 7,39E-06    |
| A_52_P359965  | NM_007754    | Cpd           | 12874     | 0,500592461  | 6,581741935 | 0,00128643  |
| A_55_P2062851 | NM_020575    | March7        | 57438     | 0,500179943  | 8,935150538 | 0,005404763 |
| A_55_P2019699 | NM_001139520 | Samhd1        | 56045     | 0,500134424  | 10,79143011 | 0,015122902 |
| A_55_P1954021 | NM_016741    | Scarb1        | 20778     | 0,500007112  | 7,22211828  | 0,001563481 |
| A_55_P2166024 | NM_030742    | Vmn1r63       | 81017     | -0,500125178 | 7,242419355 | 0,000621601 |
| A_55_P1958200 | NM_008771    | P2rx1         | 18436     | -0,500163585 | 12,00296774 | 0,075558805 |
| A_55_P2149881 | NM_010613    | Khsrp         | 16549     | -0,500284495 | 7,543397849 | 0,0030666   |
| A_55_P2102621 | NM_001113401 | Eaf2          | 106389    | -0,500357752 | 10,87712903 | 0,016615848 |
| A_55_P2090441 | AK138849     | BC028471      | 414071    | -0,500470839 | 8,408354839 | 0,006922502 |
| A_51_P400040  | NM_145441    | Ubxn2a        | 217379    | -0,500809388 | 6,68855914  | 1,76E-06    |
| A_66_P137475  | NM_001033155 | Dnajb14       | 70604     | -0,50105192  | 10,02789247 | 0,006670772 |
| A_55_P1992299 | AK031042     | 5830418K08Rik | 319675    | -0,501430299 | 8,291591398 | 0,028136674 |
| A_55_P2014460 | NM_007539    | Bdkrb1        | 12061     | -0,501463727 | 6,535827957 | 0,000823281 |
| A_55_P2069969 | NM_001122660 | Gm10639       | 100042314 | -0,501578236 | 6,214       | 0,004926751 |
| A_55_P2117699 | NM_172858    | Pak7          | 241656    | -0,501788051 | 8,888569892 | 0,060257515 |
| A_52_P627269  | NM_198171    | Ces2b         | 234669    | -0,501870555 | 6,587451613 | 0,000250551 |
| A_55_P2156530 | XM_001478556 | Gm3941        | 100042638 | -0,501921053 | 7,012043011 | 0,0008512   |
| A_55_P2044710 | NM_080444    | Asb10         | 117590    | -0,50208606  | 7,852806452 | 0,008847301 |
| A_55_P2033312 | NM_144556    | Lgi4          | 243914    | -0,502100996 | 7,048741935 | 3,03E-05    |
| A_52_P670026  | NM_021384    | Rsad2         | 58185     | -0,502124467 | 15,09535484 | 0,083661362 |
| A_51_P483658  | NM_018880    | Trim3         | 55992     | -0,502160028 | 7,700010753 | 0,002203285 |
| A_55_P2007467 | AB106871     | Gm10244       | 621427    | -0,50216074  | 7,822483871 | 0,018199745 |
| A_52_P625171  | NM_133723    | Asph          | 65973     | -0,502294452 | 6,351430108 | 2,25E-06    |
| A_55_P2011151 | NM_001163776 | Tmprss3       | 140765    | -0,502692034 | 7,840903226 | 0,000101107 |
| A_55_P2017001 | XM_979682    | Gm8426        | 667024    | -0,502819346 | 6,881591398 | 0,015268465 |
| A_51_P219444  | NM_013880    | Plcl2         | 224860    | -0,503104552 | 10,05131183 | 0,002225347 |
| A_51_P397468  | NM_016759    | Rundc3a       | 51799     | -0,503236842 | 8,624311828 | 0,011380551 |
| A_55_P2353004 | AK016253     | Pitpnm2os1    | 75927     | -0,503312945 | 8,926935484 | 0,016016225 |
| A_55_P2398995 | NM_027042    | Lelp1         | 69332     | -0,503535562 | 7,649021505 | 0,002373817 |
| A_55_P2004821 | NM_146936    | Olfr1417      | 258938    | -0,503761735 | 9,907473118 | 0,03952381  |
| A_51_P360004  | NM_029021    | Ocstamp       | 74614     | -0,503800853 | 13,14349462 | 0,089699665 |
| A_55_P2037712 | NM_133786    | Smc4          | 70099     | -0,503963016 | 8,390365591 | 0,000104815 |
| A_51_P498882  | NM_010001    | Cyp2c37       | 13096     | -0,504066856 | 7,48244086  | 0,021711131 |
| A_55_P2115732 | NM_153103    | Kif1c         | 16562     | -0,504697013 | 8,076623656 | 0,012639085 |
| A_66_P121059  | NR_028265    | Mirg          | 100040724 | -0,505613087 | 7,302       | 0,01746141  |
| A_55_P2007656 | NM_009964    | Cryab         | 12955     | -0,506096017 | 7,579247312 | 0,006618068 |
| A_55_P1998892 | NM_001177833 | Smox          | 228608    | -0,506564011 | 13,43855914 | 0,014461132 |
| A_51_P457664  | NM_010010    | Cyp46a1       | 13116     | -0,506985775 | 9,21611828  | 0,075057974 |
| A_51_P143023  | NM_001033172 | Rab11fip2     | 74998     | -0,507133713 | 6,992526882 | 0,000368444 |
| A_55_P2093949 | NM_146183    | Zfp428        | 232969    | -0,507610953 | 6,734989247 | 0,00716921  |
| A_51_P160344  | NM_028448    | Cenpv         | 73139     | -0,507696302 | 8,826763441 | 0,021763493 |
| A_55_P2166543 | NM_025571    | Pam16         | 66449     | -0,508401849 | 9,558096774 | 0,004344324 |
| A_55_P2057132 | NM_001077499 | Scn8a         | 20273     | -0,508470839 | 7,926989247 | 0,000260779 |
| A_55_P2113774 | NM_029887    | Yif1b         | 77254     | -0,508714794 | 8,457268817 | 0,003871326 |
| A_55_P1965154 | NM_025565    | Spc25         | 66442     | -0,508821479 | 7,009236559 | 7,06E-08    |
| A_55_P2071716 | NM_153590    | Klre1         | 243655    | -0,508951636 | 6,182817204 | 4,57E-07    |
| A_55_P2038484 | NM_175017    | 4933427D06Rik | 232217    | -0,509169275 | 9,737591398 | 0,000482465 |
| A_55_P2035087 | NM_177566    | Arhgef15      | 442801    | -0,509297297 | 8,111752688 | 5,99E-05    |
| A_55_P2126950 | NM_001085417 | Zfp467        | 68910     | -0,509381223 | 9,136580645 | 0,09245295  |

|               |              |               |           |              |             |             |
|---------------|--------------|---------------|-----------|--------------|-------------|-------------|
| A_55_P2169804 | NM_194059    | Nanos3        | 244551    | -0,509721195 | 10,71673118 | 0,010296778 |
| A_51_P290904  | AK040404     | Raver2        | 242570    | -0,50978734  | 8,858731183 | 0,012223592 |
| A_55_P2002773 | AK019036     | 1810053B23Rik | 69857     | -0,509820057 | 8,139494624 | 0,059431217 |
| A_55_P2012389 | NM_053197    | Sfxn3         | 94280     | -0,509825036 | 8,125806452 | 0,015299745 |
| A_55_P2134387 | NM_020289    | Olfr544       | 257926    | -0,510147226 | 12,34212903 | 0,03504785  |
| A_55_P2102065 | NM_001122660 | Gm10639       | 100042314 | -0,510445235 | 6,446365591 | 0,040738582 |
| A_55_P2117400 | AK032173     | Cacng7        | 81904     | -0,510513514 | 6,830784946 | 0,000538304 |
| A_51_P361201  | NM_013477    | Atp6v0d1      | 11972     | -0,510714794 | 9,221677419 | 0,000517937 |
| A_55_P2048800 | NM_001136055 | Cd82          | 12521     | -0,510839972 | 8,336946237 | 0,015224308 |
| A_51_P506111  | NM_019544    | Msgn1         | 56184     | -0,511152205 | 8,068645161 | 0,0375432   |
| A_65_P07361   | AK172895     | Trim14        | 74735     | -0,51129303  | 7,780322581 | 1,64E-07    |
| A_55_P1990653 | NM_001111062 | Comt          | 12846     | -0,511337838 | 8,262129032 | 9,97E-05    |
| A_55_P2055920 | AK018929     | Kcnd3os       | 78635     | -0,511372688 | 7,045311828 | 0,002572375 |
| A_51_P131561  | NM_029639    | Plet1         | 76509     | -0,51144239  | 7,074677419 | 0,007216016 |
| A_51_P516728  | NM_010404    | Hap1          | 15114     | -0,511455903 | 10,22266667 | 0,058000361 |
| A_55_P1964363 | NM_001012434 | Kctd14        | 233529    | -0,511479374 | 7,28127957  | 0,027595376 |
| A_66_P126662  | AK076313     | 4732414G09Rik | 100043309 | -0,511654339 | 7,562666667 | 0,017940012 |
| A_55_P2020453 | XM_001004753 | Gm9304        | 668693    | -0,511776671 | 8,830043011 | 0,013994458 |
| A_55_P1960506 | NM_001001493 | Wdr83os       | 414077    | -0,511954481 | 8,051322581 | 0,014782743 |
| A_55_P1985591 | NM_024170    | Cxx1a         | 66158     | -0,512219772 | 8,009795699 | 0,00343594  |
| A_55_P2120682 | NM_020585    | Golga7        | 57437     | -0,51236202  | 7,251419355 | 0,00068834  |
| A_55_P2045765 | NM_001033410 | Rnf224        | 329360    | -0,512388336 | 8,217924731 | 0,008662237 |
| A_55_P2419711 | AK016521     | 4932412D23Rik | 75722     | -0,512733997 | 9,434860215 | 0,031703233 |
| A_55_P2004375 | NM_053111    | Ear6          | 93719     | -0,512950925 | 7,46216129  | 0,002203285 |
| A_51_P328400  | NM_009939    | Cops2         | 12848     | -0,513647937 | 7,543817204 | 0,000913793 |
| A_51_P348804  | NM_019764    | Amotl2        | 56332     | -0,5136899   | 8,382731183 | 0,011774915 |
| A_51_P151020  | NM_009407    | Tnp1          | 21958     | -0,51395377  | 8,656258065 | 0,065351236 |
| A_55_P1978136 | NM_139064    | Tnip2         | 231130    | -0,513973684 | 8,886505376 | 0,000707083 |
| A_52_P559498  | NM_007713    | Clk3          | 102414    | -0,514255334 | 7,352860215 | 1,26E-10    |
| A_55_P1978481 | NM_009473    | Nr1h2         | 22260     | -0,515172119 | 11,50170968 | 0,003208959 |
| A_55_P2053943 | NM_146534    | Olfr1368      | 258527    | -0,51529872  | 8,044924731 | 0,00128643  |
| A_55_P2314229 | AK083360     | C920021A13    | 328066    | -0,515459459 | 8,882849462 | 0,023102973 |
| A_66_P111049  | NM_001101647 | Prlh          | 623503    | -0,516837838 | 7,259752688 | 0,006788226 |
| A_51_P286321  | NM_026760    | 2310036O22Rik | 68544     | -0,516899716 | 11,73591398 | 0,001176233 |
| A_52_P180408  | NM_026602    | Bcas2         | 68183     | -0,51708606  | 8,385870968 | 0,002871843 |
| A_51_P353392  | NM_019936    | Cript         | 56724     | -0,517284495 | 9,333870968 | 0,08563857  |
| A_55_P1974542 | NM_198612    | Gxytl2        | 232313    | -0,517495733 | 8,209387097 | 0,000246307 |
| A_51_P224983  | NM_012000    | Cln8          | 26889     | -0,517540541 | 7,485193548 | 0,013177706 |
| A_51_P408946  | NM_007633    | Ccne1         | 12447     | -0,518866999 | 7,55155914  | 0,000178918 |
| A_55_P2035972 | NM_021516    | Mark3         | 17169     | -0,518975107 | 7,301473118 | 0,001798669 |
| A_51_P403273  | NM_025816    | Tax1bp1       | 52440     | -0,51944808  | 10,50409677 | 0,042023115 |
| A_52_P665386  | NM_145578    | Ube2m         | 22192     | -0,519786629 | 9,969301075 | 0,016565092 |
| A_51_P176505  | NM_175109    | Rps19bp1      | 66538     | -0,520500711 | 8,019311828 | 1,54E-06    |
| A_52_P110052  | NM_010045    | Ackr1         | 13349     | -0,520502845 | 8,910731183 | 0,01698465  |
| A_55_P2035495 | NM_019778    | Zbtb20        | 56490     | -0,520907539 | 9,086935484 | 0,005754943 |
| A_55_P2029176 | AK142244     | Atr           | 245000    | -0,520923186 | 7,871344086 | 0,006721112 |
| A_66_P126984  | AK135960     | Gm10523       | 100038505 | -0,522027738 | 8,354096774 | 0,006341714 |
| A_55_P2067463 | AK007159     | 1700110I01Rik | 73549     | -0,522036984 | 8,511247312 | 0,000312382 |
| A_55_P2042086 | NM_008738    | Nrtn          | 18188     | -0,522100284 | 11,04935484 | 0,035027382 |
| A_55_P2042526 | NM_026673    | Apoo          | 68316     | -0,522353485 | 7,784784946 | 0,007100387 |

|               |              |               |           |              |             |             |
|---------------|--------------|---------------|-----------|--------------|-------------|-------------|
| A_51_P239166  | NM_020330    | Adam21        | 56622     | -0,522374822 | 6,735978495 | 0,000318322 |
| A_55_P2101074 | XM_001472853 | Gm3848        | 100042441 | -0,522458037 | 8,476333333 | 0,039113707 |
| A_55_P2050453 | NM_010416    | Hemt1         | 15202     | -0,522492176 | 7,120043011 | 0,010886609 |
| A_66_P112005  | NM_207568    | Olfr1252      | 404331    | -0,522492888 | 7,600516129 | 0,000113026 |
| A_51_P450527  | NM_011526    | Tagln         | 21345     | -0,522662873 | 11,6685914  | 0,062425967 |
| A_52_P511821  | NM_027057    | Wdfy1         | 69368     | -0,522716216 | 6,909075269 | 0,009875137 |
| A_55_P1965298 | NM_001099302 | Gm5640        | 434797    | -0,523066145 | 6,938849462 | 0,000346682 |
| A_55_P2175195 | NM_011505    | Stxbp4        | 20913     | -0,523110242 | 8,185182796 | 0,004701387 |
| A_55_P2059332 | NM_001039509 | Pnkd          | 56695     | -0,523202703 | 7,270688172 | 0,012352806 |
| A_55_P2013765 | NM_023130    | Raly          | 19383     | -0,523216927 | 9,769150538 | 0,002026121 |
| A_51_P154469  | NM_010761    | Ccndbp1       | 17151     | -0,52335064  | 14,30509677 | 0,041974929 |
| A_51_P261835  | NM_025376    | Tmem8c        | 66139     | -0,52402845  | 8,639978495 | 0,043182451 |
| A_55_P1981105 | NM_007454    | Ap1b1         | 11764     | -0,524325036 | 9,652268817 | 0,000344283 |
| A_55_P2050628 | NM_201640    | Cyp4a31       | 666168    | -0,524378378 | 7,446752688 | 0,0006181   |
| A_66_P136813  | NR_033803    | 6030408B16Rik | 77717     | -0,5248734   | 7,744043011 | 0,009000081 |
| A_66_P102719  | NM_025287    | Spop          | 20747     | -0,525034851 | 10,48144086 | 0,004743237 |
| A_51_P304859  | NM_022985    | Zfand6        | 65098     | -0,525497866 | 8,21444086  | 0,032478632 |
| A_55_P1972449 | NM_009164    | Sh3bp1        | 20401     | -0,525783073 | 8,01716129  | 0,003067918 |
| A_52_P162486  | NM_007542    | Bgn           | 12111     | -0,525965861 | 8,189752688 | 0,014603997 |
| A_55_P2017373 | NM_146100    | Ina           | 226180    | -0,526018492 | 9,255763441 | 0,025702283 |
| A_51_P373890  | NM_146079    | Guca1b        | 107477    | -0,526302987 | 9,130010753 | 0,003141587 |
| A_55_P2121275 | NM_001034864 | Gm4907        | 236749    | -0,526418208 | 7,885655914 | 0,001805863 |
| A_55_P2125491 | NM_011659    | Tnfrsf4       | 22163     | -0,5264367   | 9,072956989 | 0,013649141 |
| A_55_P2064486 | NM_001039047 | Trim58        | 216781    | -0,526780939 | 6,650946237 | 5,12E-05    |
| A_55_P2020054 | AK164572     | 2610035D17Rik | 72386     | -0,52686202  | 7,32988172  | 0,000786153 |
| A_52_P533304  | NM_173363    | Eif5          | 217869    | -0,527049075 | 12,21731183 | 0,01462483  |
| A_55_P2334177 | AK016962     | 4933428C20Rik | 71250     | -0,527316501 | 8,236204301 | 0,020685264 |
| A_55_P2019009 | NM_172495    | Ncoa7         | 211329    | -0,527391181 | 7,19588172  | 0,002173091 |
| A_55_P2275249 | NM_009377    | Th            | 21823     | -0,52764936  | 11,78862366 | 0,073715746 |
| A_52_P612137  | NM_009822    | Runx1t1       | 12395     | -0,528401849 | 6,217182796 | 1,58E-10    |
| A_55_P2075941 | NM_010897    | Nf1           | 18015     | -0,528503556 | 9,33283871  | 0,007422797 |
| A_66_P125079  | NM_008811    | Pdha2         | 18598     | -0,529233997 | 7,222731183 | 0,001143811 |
| A_55_P2065754 | NM_010676    | Krtap19-5     | 16704     | -0,529432432 | 9,102731183 | 0,012630722 |
| A_55_P2144248 | NM_146185    | Zfp790        | 233056    | -0,529433855 | 8,291677419 | 0,045741433 |
| A_55_P2197847 | CA492922     | Lhx1os        | 78365     | -0,529482219 | 9,557849462 | 0,021077609 |
| A_55_P2018205 | XM_001478261 | Gm3855        | 100042461 | -0,52976458  | 6,532677419 | 0,000499349 |
| A_51_P499551  | NM_133983    | Cd276         | 102657    | -0,530332859 | 7,222698925 | 0,001956787 |
| A_51_P129546  | NM_009219    | Sstr4         | 20608     | -0,530518492 | 7,700182796 | 0,003289682 |
| A_55_P1970642 | XM_001479403 | Gm4164        | 100043007 | -0,531307255 | 8,975870968 | 0,005764055 |
| A_52_P414368  | NM_178715    | Tmem30b       | 238257    | -0,53149431  | 8,468301075 | 0,037447778 |
| A_55_P2155002 | NM_001038998 | Ccdc23        | 69216     | -0,532268137 | 8,866053763 | 0,004172997 |
| A_55_P2185990 | NM_001081049 | Kmt2a         | 214162    | -0,532499289 | 7,566817204 | 0,005940875 |
| A_51_P511482  | NM_028680    | lft57         | 73916     | -0,532728307 | 7,45116129  | 0,012202384 |
| A_55_P2018283 | NM_010439    | Hmgb1         | 15289     | -0,532751778 | 8,167774194 | 0,003069063 |
| A_55_P2042161 | NM_027105    | Krtap26-1     | 69533     | -0,532866287 | 7,382946237 | 0,001748752 |
| A_52_P275069  | NM_001177416 | Gm6792        | 627821    | -0,532955903 | 13,51155914 | 0,021674655 |
| A_55_P2428968 | NM_028838    | Lrrc2         | 74249     | -0,533864154 | 8,240731183 | 0,012105708 |
| A_55_P2410240 | AK079813     | Gm20556       | 328576    | -0,534531294 | 8,319516129 | 0,058364398 |
| A_55_P2081405 | BC066226     | BC052688      | 432812    | -0,534559033 | 10,29896774 | 0,015836192 |
| A_52_P599624  | NM_001159519 | Pfas          | 237823    | -0,535180654 | 8,149473118 | 0,012568406 |

|               |              |               |           |              |             |             |
|---------------|--------------|---------------|-----------|--------------|-------------|-------------|
| A_55_P2146535 | NM_009924    | Cnr2          | 12802     | -0,535253912 | 9,633204301 | 0,000140083 |
| A_55_P1970740 | NM_183086    | Mrps10        | 64657     | -0,535566145 | 11,42790323 | 0,010813802 |
| A_55_P2376423 | BU523966     | Igkv4-72      | 385109    | -0,535756046 | 8,785225806 | 0,005667468 |
| A_51_P484842  | NM_007493    | Asgr2         | 11890     | -0,535852063 | 7,931096774 | 0,005226634 |
| A_55_P2129786 | NM_001164802 | Slc38a10      | 72055     | -0,536135846 | 8,936870968 | 0,014415057 |
| A_52_P637730  | NM_145405    | Ubl4          | 27643     | -0,536233286 | 9,164688172 | 0,030668705 |
| A_52_P392509  | AK018404     | Gin1          | 252876    | -0,53630441  | 7,059       | 0,000157239 |
| A_55_P2031157 | NM_010108    | Efna3         | 13638     | -0,536682077 | 8,428225806 | 0,01942209  |
| A_55_P2102408 | XM_898851    | Gm6603        | 625586    | -0,536766714 | 6,866526882 | 0,008641141 |
| A_52_P352735  | NM_001081369 | Ccdc153       | 270150    | -0,537006401 | 7,024967742 | 0,014309543 |
| A_55_P2422318 | AK014953     | 4921523P09Rik | 70926     | -0,537214794 | 7,029591398 | 0,001650758 |
| A_55_P2129373 | NM_001013767 | Capn11        | 268958    | -0,537285206 | 10,44943011 | 0,024958228 |
| A_66_P118989  | AK087483     | Gm8350        | 666892    | -0,537293741 | 8,119107527 | 0,014224099 |
| A_51_P105263  | NM_201355    | Nat14         | 269854    | -0,537364865 | 6,873419355 | 0,000407318 |
| A_55_P2051039 | NM_001099346 | Gm11937       | 100041488 | -0,537731863 | 11,03054839 | 0,039513865 |
| A_55_P1978424 | NM_007536    | Bcl2a1d       | 12047     | -0,537761024 | 8,172946237 | 0,011325979 |
| A_51_P311540  | NM_007748    | Cox6a1        | 12861     | -0,537797297 | 14,41307527 | 0,003045568 |
| A_66_P101132  | NM_178202    | Hist1h2bp     | 319188    | -0,537842817 | 7,661354839 | 0,055527935 |
| A_55_P2259500 | AK083809     | D130012P04Rik | 319377    | -0,537899716 | 8,552204301 | 0,016766509 |
| A_55_P2388197 | AK003103     | 1010001B22Rik | 75403     | -0,53835633  | 9,939946237 | 0,007755011 |
| A_66_P140658  | NM_001011822 | Olfr787       | 258069    | -0,538427454 | 12,43825806 | 0,073091911 |
| A_55_P2115297 | NM_009681    | Ap3s1         | 11777     | -0,538498578 | 9,414569892 | 0,00195542  |
| A_55_P2171912 | NM_016975    | Gja3          | 14611     | -0,538950925 | 12,90847312 | 0,041471401 |
| A_55_P2023012 | NM_026136    | 4930449I24Rik | 67410     | -0,539078947 | 7,401634409 | 0,00210841  |
| A_55_P2154235 | NR_024331    | 1700008J07Rik | 629159    | -0,539346373 | 8,510526882 | 0,017645076 |
| A_55_P2010672 | NM_010623    | Kif17         | 16559     | -0,539370555 | 9,964612903 | 0,025995122 |
| A_55_P2117574 | NM_001110130 | Ppih          | 66101     | -0,539889758 | 7,445989247 | 0,004172018 |
| A_55_P1993640 | NR_033141    | Gm6994        | 629678    | -0,53994808  | 9,595784946 | 0,000218426 |
| A_55_P2041521 | NM_001029987 | Doxl2         | 243376    | -0,540309388 | 7,502129032 | 0,002081944 |
| A_55_P2017764 | NM_028120    | Cep89         | 72140     | -0,540926743 | 7,120795699 | 1,36E-05    |
| A_55_P2002122 | NM_173402    | Rgs12         | 71729     | -0,542069701 | 7,003096774 | 4,56E-06    |
| A_55_P2024145 | NM_030741    | Vmn1r62       | 81016     | -0,54244239  | 7,161010753 | 0,000457164 |
| A_51_P254299  | NM_207666    | Dlk2          | 106565    | -0,542837127 | 8,442591398 | 0,007216016 |
| A_55_P2000613 | NM_178703    | Slc6a1        | 232333    | -0,543177098 | 8,607741935 | 0,02739496  |
| A_55_P2100715 | AK003929     | Auh           | 11992     | -0,543709815 | 9,275107527 | 0,075547502 |
| A_55_P1988498 | NM_026425    | Naa20         | 67877     | -0,544182077 | 8,249258065 | 2,00E-06    |
| A_55_P2017729 | XM_001478531 | Gm2138        | 100039286 | -0,544209104 | 8,791236559 | 0,002155212 |
| A_55_P2197998 | C77672       | D4ErtD58e     | 52054     | -0,544236842 | 12,45768817 | 0,047223729 |
| A_55_P2240523 | AK086741     | Zmiz1os1      | 414118    | -0,545088905 | 7,352483871 | 0,00213055  |
| A_51_P499195  | NM_024253    | Nkg7          | 72310     | -0,545386913 | 9,26772043  | 0,023586231 |
| A_55_P2162879 | NM_146384    | Olfr208       | 258382    | -0,545405405 | 6,202021505 | 9,69E-12    |
| A_55_P2405244 | AV207074     | 1700061N14Rik | 73432     | -0,545667141 | 7,900129032 | 0,028427579 |
| A_55_P2124831 | NM_001079873 | Brdt          | 114642    | -0,54584495  | 12,0004086  | 0,081006184 |
| A_51_P379976  | NM_001039515 | Arl4a         | 11861     | -0,546066856 | 8,839021505 | 0,033906927 |
| A_55_P2099373 | AK135677     | Gm12633       | 619842    | -0,546379801 | 7,165193548 | 0,000895957 |
| A_66_P118141  | NM_021309    | Sh2d2a        | 27371     | -0,546536273 | 9,66327957  | 0,007323248 |
| A_55_P2007699 | NM_028016    | Nanog         | 71950     | -0,546567568 | 10,41409677 | 0,004833017 |
| A_51_P494992  | NM_019732    | Runx3         | 12399     | -0,54685633  | 8,248182796 | 0,006106922 |
| A_55_P2067682 | NM_013795    | Atp5l         | 27425     | -0,547106686 | 11,14472043 | 0,039734206 |
| A_55_P2083184 | NR_026831    | Gm10272       | 16697     | -0,547178521 | 8,832505376 | 0,017206899 |

|               |              |               |           |              |             |             |
|---------------|--------------|---------------|-----------|--------------|-------------|-------------|
| A_55_P1986341 | NR_002858    | Gm4956        | 241041    | -0,547251778 | 6,772236559 | 0,002340198 |
| A_55_P2096967 | NM_008124    | Gjb1          | 14618     | -0,547369844 | 8,461774194 | 0,001322534 |
| A_55_P2157378 | NM_001045539 | Xlr5a         | 574438    | -0,547460882 | 7,770333333 | 0,015867484 |
| A_55_P1967672 | NM_207017    | Tas2r109      | 387343    | -0,547743243 | 8,86916129  | 0,025854959 |
| A_51_P453475  | NM_009201    | Slc1a5        | 20514     | -0,547984353 | 7,790548387 | 3,14E-10    |
| A_55_P2216996 | NM_001110497 | Tmem87a       | 211499    | -0,548105974 | 10,68345161 | 0,076184692 |
| A_55_P2068731 | NM_001177580 | Gm13308       | 621580    | -0,548106686 | 8,817924731 | 0,008427117 |
| A_55_P2136154 | NM_001033432 | Heca          | 380629    | -0,548931721 | 8,103741935 | 1,10E-07    |
| A_55_P2132681 | NM_019757    | Fzr1          | 56371     | -0,549939545 | 8,463150538 | 0,008483499 |
| A_55_P2006792 | NM_001025074 | Ntrk2         | 18212     | -0,550120199 | 14,19732258 | 0,027472231 |
| A_66_P125634  | NM_172864    | Wdr63         | 242253    | -0,550133001 | 10,36183871 | 0,025701927 |
| A_52_P370392  | NM_021921    | Mapk8ip2      | 60597     | -0,550302276 | 6,59344086  | 7,39E-06    |
| A_55_P1985825 | XM_001475310 | Gm2980        | 100040810 | -0,550490754 | 13,0978172  | 0,040734317 |
| A_55_P2146891 | BC051971     | Ggt5          | 23887     | -0,551503556 | 9,121537634 | 0,018329695 |
| A_51_P514029  | NM_010780    | Cma1          | 17228     | -0,55154623  | 6,322924731 | 1,11E-05    |
| A_55_P2013576 | AK016502     | Agbl4         | 78933     | -0,551740398 | 7,331086022 | 0,003146279 |
| A_66_P117294  | XM_001477027 | Gm3516        | 100041800 | -0,552025605 | 7,412806452 | 0,003113654 |
| A_55_P2063980 | NM_181549    | Clec18a       | 353287    | -0,552298009 | 7,895010753 | 0,017644736 |
| A_66_P134181  | NM_001012726 | Aym1          | 503692    | -0,552562589 | 8,383010753 | 0,015607528 |
| A_55_P2002988 | NM_001001559 | Usp17ld       | 384701    | -0,55266643  | 7,650086022 | 0,00252535  |
| A_55_P2184567 | XM_989827    | Gm9677        | 676402    | -0,552983642 | 8,799096774 | 0,016553771 |
| A_55_P2142590 | AF240782     | Mark3         | 17169     | -0,55501138  | 7,381956989 | 0,001661447 |
| A_55_P2042713 | NM_011822    | Pigq          | 14755     | -0,55541394  | 10,39374194 | 0,000855724 |
| A_55_P1976634 | NM_146312    | Olfr657       | 258309    | -0,555470128 | 7,40211828  | 0,004218852 |
| A_51_P251205  | NM_028627    | Psd           | 73728     | -0,555539118 | 8,612010753 | 0,007061788 |
| A_51_P357744  | NM_010592    | Jund          | 16478     | -0,555645092 | 13,20850538 | 0,009829758 |
| A_52_P359819  | NM_198190    | Ntf5          | 78405     | -0,555663585 | 9,356806452 | 0,036448415 |
| A_55_P1976430 | NM_207667    | Fgf14         | 14169     | -0,555684922 | 7,383       | 0,002441079 |
| A_52_P179729  | NM_025299    | Txn14a        | 27366     | -0,555842105 | 7,97055914  | 2,28E-05    |
| A_55_P2048388 | NR_033736    | E330020D12Rik | 626058    | -0,555958037 | 8,709677419 | 0,01979475  |
| A_55_P2087013 | NM_010432    | Hipk1         | 15257     | -0,556038407 | 8,112139785 | 0,032478632 |
| A_55_P1959555 | XM_990090    | Gm8591        | 667357    | -0,556105263 | 7,236612903 | 0,001699829 |
| A_52_P633752  | NM_007462    | Apc           | 11789     | -0,556320057 | 7,513494624 | 0,001079333 |
| A_51_P475076  | NM_011692    | Vbp1          | 22327     | -0,55635064  | 7,94983871  | 0,016464874 |
| A_55_P2050652 | NM_001136067 | lkbkg         | 16151     | -0,556534851 | 6,695376344 | 5,62E-07    |
| A_55_P2039699 | NM_009921    | Camp          | 12796     | -0,55658037  | 8,279655914 | 0,005003434 |
| A_55_P2096772 | NM_172462    | Zfp11         | 22648     | -0,557369844 | 7,263817204 | 0,001660862 |
| A_55_P1967133 | NM_177741    | Ppp1r3b       | 244416    | -0,557809388 | 9,059204301 | 0,000814346 |
| A_55_P2046550 | NM_013906    | Adamts8       | 30806     | -0,557821479 | 12,49724731 | 0,025494039 |
| A_55_P2154536 | NM_001159626 | Hagh          | 14651     | -0,558020626 | 12,79272043 | 0,091780861 |
| A_52_P610987  | NM_022317    | Slc28a3       | 114304    | -0,558073969 | 8,844204301 | 0,028326624 |
| A_51_P211506  | NM_146071    | Muc20         | 224116    | -0,558540541 | 8,689569892 | 0,010246812 |
| A_51_P184385  | NM_023530    | Pla2g12b      | 69836     | -0,559274538 | 7,195827957 | 0,001820239 |
| A_55_P2040367 | NM_175277    | Bola3         | 78653     | -0,559696302 | 12,9803871  | 0,043871817 |
| A_55_P2119962 | NM_028637    | 1110034G24Rik | 73747     | -0,559737553 | 9,601827957 | 0,024167813 |
| A_55_P2353462 | AK162496     | 9530036O11Rik | 654796    | -0,560100284 | 8,22411828  | 0,004372641 |
| A_51_P447258  | NM_009659    | Alox12b       | 11686     | -0,560103841 | 7,868483871 | 0,007102155 |
| A_51_P378210  | NM_008190    | Guca2a        | 14915     | -0,560395448 | 8,004462366 | 0,012199158 |
| A_55_P1991214 | NM_001113474 | Lair1         | 52855     | -0,560433855 | 9,671010753 | 0,026489424 |
| A_55_P2097340 | NM_145621    | Camkv         | 235604    | -0,560556899 | 7,058860215 | 0,000601466 |

|               |              |                |           |              |             |             |
|---------------|--------------|----------------|-----------|--------------|-------------|-------------|
| A_51_P418116  | NM_146162    | Tmem119        | 231633    | -0,560738265 | 7,653505376 | 0,001796847 |
| A_55_P2171578 | NM_018810    | Mkrn1          | 54484     | -0,561026316 | 16,69011828 | 0,006653067 |
| A_55_P1964615 | NM_133763    | Dnttip1        | 76233     | -0,561125178 | 7,20188172  | 8,36E-06    |
| A_51_P367423  | NM_028849    | Cldnd2         | 74276     | -0,561303698 | 7,840634409 | 0,001331077 |
| A_55_P2015253 | NM_001081033 | Pde11a         | 241489    | -0,561539118 | 7,128236559 | 0,001205917 |
| A_55_P2171773 | AK076976     | LOC102636217   | 102636217 | -0,56188478  | 8,370172043 | 0,031703233 |
| A_55_P2088113 | NR_033543    | Gm16287        | 100038595 | -0,562032717 | 7,036580645 | 0,000147039 |
| A_55_P2011061 | NM_173007    | Tspan12        | 269831    | -0,562225462 | 6,081795699 | 1,83E-07    |
| A_55_P2161278 | AK220503     | Spata2l        | 78779     | -0,562295164 | 7,11116129  | 0,00024852  |
| A_55_P2015405 | NM_001114679 | 9930111J21Rik1 | 667214    | -0,562332148 | 9,829763441 | 0,03476372  |
| A_51_P156263  | NM_027201    | Zfp511         | 69752     | -0,562446657 | 8,992935484 | 0,000962983 |
| A_51_P424854  | NM_013465    | Ahsg           | 11625     | -0,562539118 | 8,35344086  | 0,057309385 |
| A_55_P2067727 | NM_026280    | Mxra7          | 67622     | -0,563386202 | 7,256924731 | 0,004447506 |
| A_55_P2053309 | XM_889451    | Rgs21          | 624910    | -0,56348293  | 7,863268817 | 0,035969811 |
| A_55_P2026669 | NM_013795    | Atp5l          | 27425     | -0,563598862 | 12,3773871  | 0,03201015  |
| A_55_P2089304 | NR_024329    | 2900097C17Rik  | 347740    | -0,563654339 | 8,059290323 | 0,001450544 |
| A_51_P316173  | NM_145845    | Vmn1r192       | 252907    | -0,563821479 | 7,415473118 | 0,000839535 |
| A_51_P297069  | NM_021883    | Tmod1          | 21916     | -0,563863442 | 7,009387097 | 0,008301517 |
| A_55_P2037454 | NM_023794    | Etv5           | 104156    | -0,564007824 | 12,62743011 | 0,03580237  |
| A_55_P2008407 | NM_133485    | Ppp1r14c       | 76142     | -0,564082504 | 11,83210753 | 0,055987666 |
| A_55_P2115119 | NM_027187    | Rnaseh2a       | 69724     | -0,564257468 | 7,739494624 | 2,67E-12    |
| A_55_P2146295 | NM_010725    | Lmx1b          | 16917     | -0,564394737 | 8,586806452 | 0,006950365 |
| A_55_P2168426 | NM_172293    | Pced1b         | 239647    | -0,564426743 | 9,354096774 | 2,50E-06    |
| A_55_P2168451 | AK044505     | A930017K11Rik  | 100034748 | -0,564482219 | 7,539       | 0,001750869 |
| A_55_P2019814 | NM_001163263 | Rnf20          | 109331    | -0,56464936  | 10,3661828  | 0,016855688 |
| A_51_P108629  | NM_008865    | Prl3b1         | 18776     | -0,564669986 | 8,133903226 | 0,002346897 |
| A_52_P638283  | NM_207258    | Fam71f1        | 330277    | -0,564862731 | 7,11311828  | 0,002747921 |
| A_55_P2047626 | NM_030021    | Cutal          | 77996     | -0,564963727 | 9,646301075 | 0,013905388 |
| A_51_P153224  | NM_025428    | Zdhhc12        | 66220     | -0,564970128 | 8,53555914  | 0,015455593 |
| A_55_P2013043 | NM_011454    | Serpib6b       | 20708     | -0,56498293  | 7,132075269 | 1,06E-05    |
| A_55_P2131238 | NM_153392    | Ttc39a         | 230603    | -0,565603129 | 7,779634409 | 0,04315478  |
| A_55_P2374197 | AK035904     | Spag17os       | 320613    | -0,567088193 | 8,418505376 | 0,085375925 |
| A_55_P1970159 | NM_013876    | Rnf11          | 29864     | -0,567492888 | 12,12670968 | 0,071784802 |
| A_55_P2248330 | AK012503     | 2700068H02Rik  | 72563     | -0,567572546 | 7,630698925 | 0,004144236 |
| A_55_P2070054 | NM_030702    | Senp3          | 80886     | -0,56795377  | 11,37329032 | 0,016543933 |
| A_55_P2121142 | NM_198647    | Tbc1d22b       | 381085    | -0,568465861 | 9,904935484 | 0,000943641 |
| A_55_P1980677 | NM_027037    | 1700007K09Rik  | 69318     | -0,568526316 | 12,68415054 | 0,056102747 |
| A_52_P106789  | NM_026434    | Rbm18          | 67889     | -0,569435989 | 7,806268817 | 3,62E-08    |
| A_55_P2025008 | NM_001042489 | Hvcn1          | 74096     | -0,570036984 | 12,23305376 | 0,013122518 |
| A_55_P2179805 | NM_021482    | SyngR4         | 58867     | -0,570319346 | 7,70388172  | 0,000565725 |
| A_55_P2183854 | NM_001012322 | Sctr           | 319229    | -0,570524182 | 12,86913978 | 0,054095653 |
| A_55_P2076941 | NM_001081406 | Lrr1           | 69706     | -0,570611664 | 7,104333333 | 0,000169674 |
| A_52_P438919  | NM_001011814 | Olfr524        | 258055    | -0,570702703 | 7,817892473 | 0,004637349 |
| A_55_P2076998 | NM_009973    | Csn1s2b        | 12992     | -0,570707681 | 6,905204301 | 8,79E-05    |
| A_55_P2001871 | NM_009479    | Uros           | 22276     | -0,570901849 | 7,652365591 | 0,001976405 |
| A_55_P2155620 | NM_025282    | Mef2c          | 17260     | -0,570914651 | 9,61488172  | 0,049858802 |
| A_51_P121455  | NM_026542    | Slc25a39       | 68066     | -0,570930299 | 12,50329032 | 0,032612268 |
| A_51_P377526  | NM_009293    | Sts            | 20905     | -0,571507112 | 9,027989247 | 0,007755011 |
| A_51_P144648  | NM_177151    | Vps13b         | 666173    | -0,571547653 | 6,225956989 | 4,45E-08    |
| A_55_P1996683 | NM_008406    | Itih1          | 16424     | -0,571722617 | 7,925344086 | 0,012826677 |



|               |              |               |           |              |             |             |
|---------------|--------------|---------------|-----------|--------------|-------------|-------------|
| A_55_P2148478 | NM_029652    | Klhl25        | 207952    | -0,571852063 | 9,107451613 | 0,009828156 |
| A_55_P2125496 | NM_001129886 | Gm10731       | 100039043 | -0,571950213 | 11,91474194 | 0,036179639 |
| A_55_P2174203 | NM_144862    | Lims2         | 225341    | -0,572157183 | 8,540419355 | 0,012331924 |
| A_55_P2215880 | NM_010142    | Ephb2         | 13844     | -0,572630156 | 8,356043011 | 0,001631223 |
| A_66_P125962  | NM_010432    | Hipk1         | 15257     | -0,573175676 | 8,882924731 | 0,044789962 |
| A_55_P1953093 | NM_148917    | Pabpc4        | 230721    | -0,573499289 | 9,640193548 | 0,020884963 |
| A_55_P2186778 | NM_146804    | Olfr905       | 258800    | -0,573567568 | 7,081612903 | 0,006653067 |
| A_55_P2173629 | NM_001115154 | Samd3         | 268288    | -0,573733997 | 6,680322581 | 9,13E-07    |
| A_55_P2029630 | NM_011900    | Mpdu1         | 24070     | -0,57490256  | 8,772655914 | 0,02725816  |
| A_55_P1960664 | XM_001475067 | Gm3035        | 100040908 | -0,574906828 | 10,87849462 | 0,030522775 |
| A_55_P2040962 | NM_001033442 | Gm1604b       | 381059    | -0,575334993 | 10,43531183 | 0,00666451  |
| A_55_P2422243 | AK013766     | 2900072G11Rik | 73005     | -0,575517781 | 10,76390323 | 0,039488888 |
| A_55_P2001159 | NM_025699    | Oser1         | 66680     | -0,575539118 | 11,20909677 | 0,015235991 |
| A_55_P2070373 | NM_201374    | Ccdc155       | 384619    | -0,575642248 | 7,267698925 | 0,003705434 |
| A_51_P114693  | NM_145562    | Parm1         | 231440    | -0,575980085 | 7,389430108 | 0,000348573 |
| A_52_P157170  | NM_027258    | Rnf157        | 217340    | -0,576188478 | 7,549053763 | 0,006818352 |
| A_55_P2039896 | NM_028873    | Dnajc14       | 74330     | -0,576586771 | 8,944       | 0,048222622 |
| A_55_P1995104 | NR_024078    | Btbd19        | 78611     | -0,576699147 | 7,352752688 | 0,009263159 |
| A_51_P450278  | NM_027237    | 2010003K11Rik | 69861     | -0,576836415 | 7,391064516 | 0,005651257 |
| A_55_P2173199 | NM_001104615 | Vmn2r4        | 637053    | -0,576912518 | 7,419688172 | 0,004819705 |
| A_55_P2037787 | XM_001478340 | Gm3798        | 100042341 | -0,577387624 | 6,392731183 | 9,96E-05    |
| A_51_P487048  | NM_008955    | Rhox6         | 19202     | -0,577463016 | 7,04288172  | 0,001232912 |
| A_52_P147803  | NM_153577    | Syne4         | 233066    | -0,577484353 | 7,905075269 | 0,002836333 |
| A_51_P295034  | NM_010915    | Klk1b4        | 18048     | -0,577798009 | 8,64072043  | 0,030668705 |
| A_52_P549954  | XM_001477150 | Gm3559        | 100041875 | -0,578064011 | 7,690666667 | 0,001307157 |
| A_55_P2150555 | NM_029508    | Pcgf5         | 76073     | -0,57833357  | 9,470978495 | 0,003351006 |
| A_55_P1971734 | NM_016678    | Reck          | 53614     | -0,578484353 | 7,61127957  | 0,025480942 |
| A_51_P446469  | NM_010071    | Dok2          | 13449     | -0,57862091  | 9,55411828  | 0,005154592 |
| A_55_P2077958 | NM_008463    | Klra5         | 16636     | -0,578842817 | 6,324731183 | 7,15E-06    |
| A_55_P1970274 | NM_001033425 | Zscan10       | 332221    | -0,579744666 | 8,494645161 | 0,018812632 |
| A_52_P416327  | NM_178687    | Cd226         | 225825    | -0,580013514 | 9,738483871 | 0,01859799  |
| A_51_P156631  | NM_028419    | Glrx5         | 73046     | -0,580691323 | 14,07936559 | 0,095911574 |
| A_55_P2117033 | NM_028860    | Mtmr3         | 74302     | -0,580780939 | 9,763978495 | 0,00522067  |
| A_55_P1996365 | NM_206975    | Ifna14        | 404549    | -0,581046942 | 7,789924731 | 0,011977295 |
| A_55_P2134938 | NM_001135991 | Krtap10-4     | 100191037 | -0,581459459 | 8,326333333 | 0,004764679 |
| A_55_P2003178 | NM_172414    | Zc2hc1c       | 72350     | -0,581538407 | 6,517849462 | 1,11E-08    |
| A_55_P2131498 | AK160774     | Tamm41        | 68971     | -0,582020626 | 7,350623656 | 0,001953358 |
| A_55_P2000909 | NM_013795    | Atp5l         | 27425     | -0,582736842 | 12,86405376 | 0,024951908 |
| A_52_P141687  | NM_134438    | Gpr37l1       | 171469    | -0,582861309 | 8,668849462 | 0,010499387 |
| A_55_P2206605 | AK030886     | 5830444B04Rik | 641454    | -0,58301138  | 6,174677419 | 0,002311307 |
| A_51_P501364  | NM_019507    | Tbx21         | 57765     | -0,583038407 | 7,504655914 | 0,000201889 |
| A_51_P127297  | NM_008288    | Hsd11b1       | 15483     | -0,583133001 | 8,580580645 | 1,22E-06    |
| A_55_P2054310 | NM_010749    | M6pr          | 17113     | -0,583415363 | 9,049408602 | 0,000121061 |
| A_51_P267278  | NM_021301    | Slc15a2       | 57738     | -0,583998578 | 6,177365591 | 0,003110732 |
| A_52_P337259  | NM_013905    | Heyl          | 56198     | -0,584209104 | 9,960408602 | 0,042227661 |
| A_55_P2127425 | NM_025575    | Sys1          | 66460     | -0,584914651 | 10,54774194 | 0,016553771 |
| A_51_P263246  | NM_008748    | Dusp8         | 18218     | -0,585165007 | 6,34627957  | 1,34E-06    |
| A_55_P1999202 | NM_134239    | Vmn1r217      | 171273    | -0,585214794 | 9,359397849 | 0,018974514 |
| A_55_P2170514 | NM_018754    | Sfn           | 55948     | -0,585650782 | 7,697419355 | 0,005804158 |
| A_55_P2071656 | NM_010610    | Kcnma1        | 16531     | -0,585815789 | 6,943182796 | 0,000842538 |

|               |              |               |           |              |             |             |
|---------------|--------------|---------------|-----------|--------------|-------------|-------------|
| A_55_P2018377 | XM_001477144 | Gm3502        | 100041765 | -0,586174253 | 7,775634409 | 0,004377682 |
| A_55_P2225751 | AK031835     | 6330415G19Rik | 320020    | -0,586397582 | 8,720193548 | 0,008664748 |
| A_55_P2151209 | NM_130873    | Krtap19-4     | 170654    | -0,586434566 | 12,8277957  | 0,016543377 |
| A_51_P177691  | NM_008075    | Gabrr1        | 14408     | -0,586628734 | 7,876956989 | 0,00128643  |
| A_55_P1961152 | NM_011141    | Pou3f1        | 18991     | -0,586713371 | 9,022258065 | 0,009249802 |
| A_51_P501922  | NM_008881    | Plxna1        | 18844     | -0,586733997 | 9,988978495 | 0,002592016 |
| A_55_P2099952 | NM_009799    | Car1          | 12346     | -0,586823613 | 6,478591398 | 0,000315958 |
| A_52_P129697  | NM_172656    | Stradb        | 227154    | -0,58708037  | 8,600387097 | 0,007082159 |
| A_55_P2169356 | AK156879     | Gm1966        | 434223    | -0,587198435 | 9,294924731 | 0,07374495  |
| A_55_P1963549 | NM_001166842 | Vmn1r168      | 100043101 | -0,587608819 | 11,60791398 | 0,058083109 |
| A_55_P2274592 | NM_001163634 | Wnt7b         | 22422     | -0,588034139 | 7,41083871  | 0,002173091 |
| A_55_P1961320 | NM_207176    | Tes           | 21753     | -0,588277383 | 7,684645161 | 2,94E-05    |
| A_51_P132718  | AK019082     | 2310010J17Rik | 78329     | -0,588495733 | 10,97389247 | 0,015502978 |
| A_51_P289107  | NM_133849    | Hrh3          | 99296     | -0,588509246 | 7,48788172  | 0,003554641 |
| A_51_P145511  | NM_019991    | Prl2a1        | 56635     | -0,589118777 | 11,65334409 | 0,050567043 |
| A_55_P2034027 | NM_008713    | Nos3          | 18127     | -0,590152916 | 7,522258065 | 0,007525424 |
| A_55_P2107901 | NM_207666    | Dlk2          | 106565    | -0,591007824 | 12,42194624 | 0,058274691 |
| A_51_P330144  | NM_134126    | lft140        | 106633    | -0,59116074  | 7,374666667 | 0,003975528 |
| A_55_P1968464 | NM_001081149 | Kat6a         | 244349    | -0,591258179 | 8,585483871 | 8,24E-05    |
| A_55_P2072906 | NM_001177391 | Gm6788        | 627788    | -0,591533428 | 9,420580645 | 4,74E-06    |
| A_55_P1953236 | AK158370     | Epb4.2        | 13828     | -0,591913229 | 6,885225806 | 0,007038216 |
| A_55_P2065834 | NM_144831    | Dhx8          | 217207    | -0,592337127 | 10,9992043  | 0,013911465 |
| A_55_P1973941 | NM_011404    | Slc7a5        | 20539     | -0,592633001 | 8,303021505 | 0,022414732 |
| A_55_P2084646 | NM_153409    | Csrnp3        | 77771     | -0,593713371 | 9,251688172 | 0,010497403 |
| A_55_P2105970 | NM_001122668 | E330014E10Rik | 665943    | -0,593937411 | 8,10872043  | 0,008613576 |
| A_55_P2024021 | NM_013795    | Atp5l         | 27425     | -0,594018492 | 12,40465591 | 0,023895595 |
| A_52_P476560  | NM_145853    | Tpcn1         | 252972    | -0,594093883 | 8,508806452 | 0,005162576 |
| A_55_P1989312 | NM_001171004 | Prkd3         | 75292     | -0,594248933 | 7,557946237 | 0,014128549 |
| A_51_P139678  | NM_009264    | Sprr1a        | 20753     | -0,594319346 | 11,17278495 | 0,027754728 |
| A_66_P120612  | NR_002873    | Vax2os        | 574519    | -0,595439545 | 8,659946237 | 0,025644999 |
| A_55_P2033500 | NM_175641    | Ltbp4         | 108075    | -0,595456615 | 7,722301075 | 0,007216016 |
| A_55_P2108389 | NM_177135    | D830030K20Rik | 320333    | -0,59571266  | 9,186623656 | 0,043034317 |
| A_51_P430423  | NM_007398    | Ada           | 11486     | -0,595822191 | 6,769483871 | 1,27E-07    |
| A_51_P419959  | NM_028932    | Eaf1          | 74427     | -0,596099573 | 7,157       | 6,34E-05    |
| A_55_P2136902 | NM_001085500 | Cisd3         | 217149    | -0,596579659 | 10,96335484 | 0,00835165  |
| A_55_P2028949 | NR_002880    | Gm21944       | 654455    | -0,596748933 | 6,977956989 | 0,000336673 |
| A_55_P2155421 | NM_001109971 | Sec61g        | 20335     | -0,596800142 | 16,03702151 | 0,030054443 |
| A_55_P2099571 | NM_028727    | Nol9          | 74035     | -0,597061166 | 7,997655914 | 0,006796192 |
| A_55_P2055809 | NM_134050    | Rab15         | 104886    | -0,597241821 | 8,212827957 | 0,005214814 |
| A_52_P343661  | NM_178036    | Lcn10         | 332578    | -0,598534139 | 8,219483871 | 0,004527144 |
| A_66_P135700  | NM_001104531 | Cyp2d11       | 545123    | -0,598906117 | 11,10492473 | 0,05133776  |
| A_55_P1953411 | AK162207     | Efcab3        | 70894     | -0,599321479 | 7,208225806 | 0,000802941 |
| A_52_P447196  | NM_053185    | Col4a6        | 94216     | -0,599381223 | 8,715967742 | 0,003477948 |
| A_55_P2122666 | NM_153169    | Pnma3         | 245468    | -0,599622333 | 10,54935484 | 0,025471492 |
| A_55_P2089955 | NM_001025086 | Rhox7         | 547168    | -0,599773115 | 11,45765591 | 0,029557496 |
| A_51_P447976  | NM_001142952 | Fam46c        | 74645     | -0,601004979 | 16,33609677 | 0,009993707 |
| A_55_P1992889 | NM_009776    | Serping1      | 12258     | -0,601802276 | 11,58846237 | 0,069260666 |
| A_55_P2071191 | NM_133351    | Prss8         | 76560     | -0,602193457 | 7,312677419 | 0,001656124 |
| A_55_P2056774 | NM_025330    | Hsd17b14      | 66065     | -0,602282361 | 9,361817204 | 0,013177706 |
| A_55_P2077263 | NM_021790    | Cenpk         | 60411     | -0,602980797 | 8,101419355 | 0,002577696 |

|               |              |               |        |              |             |             |
|---------------|--------------|---------------|--------|--------------|-------------|-------------|
| A_51_P364560  | NR_033224    | D330050I16Rik | 414115 | -0,603401849 | 7,308505376 | 0,003787498 |
| A_51_P501248  | NM_025367    | Sphk1         | 20698  | -0,603847795 | 7,020150538 | 0,006336989 |
| A_55_P1977802 | NM_176807    | Folr4         | 64931  | -0,60409744  | 7,955215054 | 0,000200315 |
| A_51_P334942  | NM_013467    | Aldh1a1       | 11668  | -0,604192745 | 14,4026129  | 0,010603963 |
| A_51_P101006  | NM_001033874 | Ak8           | 68870  | -0,604193457 | 8,042086022 | 0,007207691 |
| A_55_P1970062 | NM_001033323 | Igsf9b        | 235086 | -0,604334993 | 9,868236559 | 0,079281938 |
| A_55_P2152387 | NM_019573    | Wwox          | 80707  | -0,604535562 | 7,959655914 | 0,001066413 |
| A_55_P2001290 | NM_009454    | Ube2e3        | 22193  | -0,604891181 | 10,31521505 | 0,021850335 |
| A_51_P394474  | NM_008806    | Pde6b         | 18587  | -0,605190612 | 8,180397849 | 0,006106922 |
| A_55_P2173947 | NM_001159693 | Zar1l         | 545824 | -0,605344239 | 6,583591398 | 0,000100963 |
| A_55_P2062444 | NM_133771    | Memo1         | 76890  | -0,605391181 | 11,1018172  | 0,044292761 |
| A_55_P2121697 | AK140370     | E530001K10Rik | 414123 | -0,6059367   | 8,784698925 | 0,01154775  |
| A_55_P2091928 | NM_009017    | Raet1b        | 19369  | -0,606544097 | 8,266741935 | 0,00275157  |
| A_51_P194004  | NM_174846    | Glyctk        | 235582 | -0,606668563 | 7,329537634 | 0,001663437 |
| A_55_P2097478 | NM_010266    | Gda           | 14544  | -0,606785917 | 15,02060215 | 0,043828976 |
| A_51_P245631  | NM_028713    | Rftn2         | 74013  | -0,607182077 | 8,226129032 | 0,004176047 |
| A_55_P1979699 | NM_025287    | Spop          | 20747  | -0,60793101  | 8,615322581 | 0,000309671 |
| A_55_P2048656 | NM_013795    | Atp5l         | 27425  | -0,607990043 | 12,3685914  | 0,015539563 |
| A_55_P2137984 | XM_979177    | Gm7767        | 665748 | -0,608409673 | 10,89673118 | 0,004701387 |
| A_55_P2155136 | NM_001008230 | Rtp2          | 224055 | -0,608709104 | 10,11591398 | 0,02085014  |
| A_55_P2051444 | NM_031190    | Pgk2          | 18663  | -0,608766714 | 8,084236559 | 0,005850502 |
| A_55_P2167840 | NM_001097977 | Gm14151       | 433486 | -0,60894239  | 7,478096774 | 0,00227057  |
| A_55_P2062911 | NM_007937    | Epha5         | 13839  | -0,609010669 | 9,332516129 | 3,28E-05    |
| A_55_P1962209 | NM_030712    | Cxcr6         | 80901  | -0,609239687 | 6,763860215 | 2,15E-05    |
| A_55_P2020549 | AK157864     | Iscu          | 66383  | -0,609832148 | 8,550967742 | 0,005520471 |
| A_55_P2038111 | NM_001033393 | Tmem104       | 320534 | -0,6098734   | 9,136408602 | 0,009286546 |
| A_55_P2178632 | NR_024509    | Tmem80        | 71448  | -0,610049075 | 9,260268817 | 0,008010254 |
| A_51_P324303  | NM_153789    | Mylip         | 218203 | -0,6101266   | 9,72883871  | 0,001450274 |
| A_55_P2100149 | NM_001038609 | Mapt          | 17762  | -0,610316501 | 7,77716129  | 0,006020519 |
| A_55_P2053888 | NM_146964    | Olfr61        | 18362  | -0,610514225 | 7,580688172 | 0,005842162 |
| A_51_P470851  | NM_146223    | Cplx3         | 235415 | -0,610525605 | 12,48525806 | 0,045394727 |
| A_52_P558087  | NM_026173    | Poc5          | 67463  | -0,611018492 | 8,272129032 | 0,000210656 |
| A_51_P140347  | NM_172830    | Slc4a9        | 240215 | -0,612719772 | 8,265827957 | 0,00128669  |
| A_51_P226417  | NM_178376    | Rraga         | 68441  | -0,613120199 | 7,678193548 | 8,17E-05    |
| A_55_P2089677 | NM_001115009 | Synrg         | 217030 | -0,613968706 | 10,99562366 | 0,005646358 |
| A_66_P106095  | AK036720     | Nctc1         | 330677 | -0,613974395 | 8,759408602 | 0,002697874 |
| A_55_P2029417 | NM_183287    | 2610318N02Rik | 70458  | -0,613990043 | 7,434817204 | 0,000311497 |
| A_55_P2440441 | NM_172598    | Wdhd1         | 218973 | -0,614048364 | 7,566612903 | 0,001657819 |
| A_55_P2362601 | AK078562     | D4Ertd681e    | 52421  | -0,614464438 | 9,225387097 | 0,01078593  |
| A_55_P2001903 | NR_024069    | Smim4         | 66487  | -0,614995733 | 9,278806452 | 3,12E-09    |
| A_52_P276525  | NM_175207    | Ankrd9        | 74251  | -0,615894737 | 9,195827957 | 0,015716611 |
| A_55_P2043317 | NM_001171739 | Bag1          | 12017  | -0,616165718 | 13,84208602 | 0,004547054 |
| A_55_P2104662 | NM_026213    | Ttc33         | 67515  | -0,616186344 | 9,043806452 | 0,022083368 |
| A_55_P2100973 | NM_016851    | Irf6          | 54139  | -0,616246799 | 11,21302151 | 0,071386266 |
| A_66_P107671  | NM_001081289 | Fam217b       | 71532  | -0,61649431  | 8,115666667 | 0,002697874 |
| A_55_P1988678 | NM_001081094 | Znhit6        | 229937 | -0,616970839 | 7,436655914 | 0,004912978 |
| A_51_P412914  | NM_010112    | Efs           | 13644  | -0,617241821 | 7,379913978 | 0,000937265 |
| A_51_P454993  | NM_178874    | Tmcc2         | 68875  | -0,617445235 | 8,500225806 | 0,004703303 |
| A_55_P2002351 | NM_153382    | Lats2         | 50523  | -0,61766074  | 6,685580645 | 3,01E-10    |
| A_55_P1991505 | NM_010255    | Gamt          | 14431  | -0,617796586 | 7,637946237 | 8,85E-05    |

|               |              |               |           |              |             |             |
|---------------|--------------|---------------|-----------|--------------|-------------|-------------|
| A_66_P107703  | NM_145533    | Smox          | 228608    | -0,618178521 | 10,98301075 | 0,011354066 |
| A_52_P382876  | NM_177692    | Bloc1s3       | 232946    | -0,618294452 | 8,658129032 | 0,010347513 |
| A_51_P343323  | NM_053071    | Cox6c         | 12864     | -0,618509246 | 12,16201075 | 0,013178466 |
| A_55_P2108850 | NM_145486    | March2        | 224703    | -0,618585349 | 12,63263441 | 0,012655196 |
| A_55_P1999294 | NM_028487    | Gpbp1         | 73274     | -0,618591038 | 10,33741935 | 0,00443827  |
| A_51_P113773  | NM_029420    | Slx1b         | 75764     | -0,618842817 | 10,56590323 | 0,027219173 |
| A_51_P160413  | NM_178691    | Yod1          | 226418    | -0,618885491 | 7,490290323 | 0,007245692 |
| A_55_P1975285 | NM_001025067 | Lrig2         | 269473    | -0,618992176 | 8,956258065 | 0,001669843 |
| A_55_P2167189 | NM_027600    | 4921504E06Rik | 70909     | -0,619703414 | 12,67437634 | 0,037449722 |
| A_55_P2079516 | NM_008621    | Mpp1          | 17524     | -0,619780228 | 8,778473118 | 0,049427706 |
| A_55_P2246700 | AU023048     | D7ErtD595e    | 52137     | -0,619998578 | 8,26472043  | 0,001407732 |
| A_55_P1966528 | NM_025928    | Pmf1          | 67037     | -0,620811522 | 10,12249462 | 0,002775352 |
| A_55_P1978661 | NM_153423    | Wasf2         | 242687    | -0,621417496 | 8,061591398 | 0,005734005 |
| A_55_P2025468 | NM_009437    | Tst           | 22117     | -0,621694879 | 9,209107527 | 0,025732489 |
| A_55_P2061492 | AK139523     | Pnlcd1        | 240023    | -0,621756757 | 9,764268817 | 0,008569704 |
| A_55_P2008567 | NM_009096    | Rps6          | 20104     | -0,621815789 | 7,374537634 | 4,65E-06    |
| A_55_P2176802 | NM_010432    | Hipk1         | 15257     | -0,622314367 | 9,193193548 | 0,034600077 |
| A_55_P2114427 | NM_009952    | Creb1         | 12912     | -0,622325747 | 7,586763441 | 0,002473562 |
| A_55_P2065113 | NM_001177484 | Gm11559       | 100415785 | -0,622431721 | 10,79125806 | 0,012658329 |
| A_51_P261107  | NM_139144    | Ogt           | 108155    | -0,622665718 | 7,673913978 | 0,000474691 |
| A_55_P1970067 | NM_001129787 | Igsf9b        | 235086    | -0,62294239  | 8,955956989 | 0,008045551 |
| A_55_P2108983 | NM_001033378 | A430078G23Rik | 319493    | -0,623083215 | 15,46263441 | 0,025322082 |
| A_55_P2028651 | BC120533     | E030019B06Rik | 212124    | -0,623761024 | 7,910516129 | 0,001272708 |
| A_55_P1974877 | NM_009743    | Bcl2l1        | 12048     | -0,623861309 | 15,33122581 | 0,013219165 |
| A_51_P205740  | NM_054093    | Ube3b         | 117146    | -0,624422475 | 8,844516129 | 4,81E-06    |
| A_55_P2157448 | NM_198018    | Abr           | 109934    | -0,625465149 | 7,589107527 | 0,000345679 |
| A_51_P133422  | AK014772     | Nck2          | 17974     | -0,626330014 | 10,36341935 | 0,01387747  |
| A_55_P2006133 | NM_181321    | Tmc6          | 217353    | -0,626757468 | 13,58876344 | 0,051749547 |
| A_55_P2114776 | NM_015764    | Greb1         | 268527    | -0,62721266  | 8,14155914  | 0,002332298 |
| A_51_P276479  | NM_178098    | 4930486L24Rik | 214639    | -0,627837127 | 8,176956989 | 0,027373413 |
| A_55_P1986703 | AK006803     | 1700055N04Rik | 73458     | -0,627879801 | 8,520344086 | 0,005997001 |
| A_51_P298486  | NM_026225    | Cog6          | 67542     | -0,628159317 | 8,03927957  | 0,005948539 |
| A_55_P2135383 | NM_001177798 | Taf6l         | 225895    | -0,628407539 | 6,770397849 | 1,79E-05    |
| A_65_P12359   | NM_001033768 | Pin1rt1       | 241593    | -0,628463016 | 10,22030108 | 0,01090736  |
| A_51_P511511  | NM_054103    | Stk33         | 117229    | -0,628553343 | 7,342387097 | 0,000256684 |
| A_55_P2173506 | AK142977     | Nhsl2         | 100042480 | -0,628591038 | 7,329462366 | 0,000105895 |
| A_55_P2019784 | NM_028880    | Lrrtm1        | 74342     | -0,628630156 | 8,370483871 | 0,007854051 |
| A_55_P2056521 | NM_019647    | Rpl21         | 19933     | -0,630006401 | 6,520967742 | 4,80E-09    |
| A_55_P2279997 | AK016075     | 4930549C15Rik | 75243     | -0,630027738 | 10,69016129 | 0,031034874 |
| A_55_P2295146 | AK019394     | 4930445N18Rik | 73985     | -0,630615932 | 7,464430108 | 9,65E-05    |
| A_55_P1994688 | NM_001037740 | Strip2        | 320609    | -0,630868421 | 7,710387097 | 0,001929991 |
| A_55_P2071952 | NM_178909    | Wdr92         | 103784    | -0,630912518 | 10,99172043 | 0,001367614 |
| A_55_P2085616 | NM_021552    | Nsa2          | 59050     | -0,631162162 | 7,898784946 | 0,0014009   |
| A_55_P1966070 | NM_199063    | Ssx9          | 382206    | -0,631621622 | 9,418419355 | 0,026639558 |
| A_55_P2114437 | NM_013645    | Pvalb         | 19293     | -0,631964438 | 7,600462366 | 0,00063764  |
| A_52_P145349  | NM_172656    | Stradb        | 227154    | -0,633071124 | 9,380634409 | 0,001384662 |
| A_55_P2024061 | NM_153116    | Gtpbp10       | 207704    | -0,633182788 | 9,110913978 | 0,002106317 |
| A_55_P2052066 | XM_001473267 | Gm2082        | 100039173 | -0,633220484 | 7,088989247 | 0,000599996 |
| A_66_P122219  | NM_001039347 | Kcnd3         | 56543     | -0,633578236 | 9,392967742 | 0,024777558 |
| A_55_P2094966 | NM_178216    | Hist2h3c1     | 15077     | -0,633874822 | 7,291258065 | 2,42E-07    |

|               |              |               |           |              |             |              |
|---------------|--------------|---------------|-----------|--------------|-------------|--------------|
| A_51_P489337  | NM_019584    | Becn1         | 56208     | -0,634112376 | 9,89627957  | 0,001030981  |
| A_55_P2074435 | XM_001472207 | Gm2046        | 100039100 | -0,634172831 | 7,290494624 | 0,00128643   |
| A_55_P2160726 | AK147898     | Tfcp2         | 21422     | -0,634260313 | 7,913688172 | 0,003322707  |
| A_55_P2004526 | NM_010650    | Klra8         | 16639     | -0,634955903 | 7,106397849 | 0,000106777  |
| A_55_P2135351 | AF212920     | Fam89b        | 17826     | -0,635174964 | 10,53111828 | 0,002821996  |
| A_55_P2077956 | NM_001099918 | Klrb1         | 100043861 | -0,635349929 | 6,588505376 | 2,74E-09     |
| A_52_P131062  | NM_010675    | Krtap8-1      | 16703     | -0,635502134 | 9,087752688 | 0,008691577  |
| A_55_P2184385 | XM_001475079 | Gm2908        | 100040689 | -0,635576102 | 9,697956989 | 0,052600555  |
| A_55_P2004741 | NM_175471    | Cyb5rl        | 230582    | -0,635578236 | 7,104376344 | 0,000247234  |
| A_66_P132496  | AY261387     | Asic3         | 171209    | -0,635593883 | 8,281784946 | 0,018199745  |
| A_52_P652316  | NM_153058    | Mapre2        | 212307    | -0,635694879 | 8,451967742 | 0,000279282  |
| A_55_P1973838 | NM_008135    | Slc6a9        | 14664     | -0,635768137 | 8,555698925 | 0,007760174  |
| A_51_P346884  | NM_025665    | Snrnp27       | 66618     | -0,63593101  | 8,430043011 | 0,000125693  |
| A_55_P2316760 | AK020472     | 9430063H18Rik | 77359     | -0,636184922 | 8,882946237 | 0,009427878  |
| A_66_P120558  | NM_025571    | Pam16         | 66449     | -0,636497155 | 8,654645161 | 0,001331077  |
| A_55_P1996171 | NM_029508    | Pcgf5         | 76073     | -0,637462304 | 10,43466667 | 0,005395926  |
| A_51_P428483  | NM_181849    | Fgb           | 110135    | -0,637487198 | 7,693225806 | 0,003055208  |
| A_55_P2161347 | NM_001033041 | Acmsd         | 266645    | -0,63871835  | 7,649193548 | 0,035817643  |
| A_51_P340829  | NM_177604    | AA986860      | 212439    | -0,638778094 | 8,001935484 | 0,002173091  |
| A_51_P426347  | NM_009435    | Tssk1         | 22114     | -0,638959459 | 6,781580645 | 3,94E-05     |
| A_55_P2157388 | NM_177864    | Skint9        | 329918    | -0,639105974 | 8,665043011 | 0,003001033  |
| A_52_P87793   | NM_147118    | Olfr635       | 259122    | -0,639342105 | 8,66311828  | 0,015282412  |
| A_55_P2070239 | NM_016703    | Preb          | 50907     | -0,639462304 | 10,02507527 | 0,008662237  |
| A_55_P2010788 | NM_008135    | Slc6a9        | 14664     | -0,639552632 | 8,33916129  | 0,006964415  |
| A_55_P2118441 | NM_010846    | Mx1           | 17857     | -0,639822191 | 7,680473118 | 0,062043004  |
| A_55_P2089198 | NM_011880    | Rgs7          | 24012     | -0,640731152 | 10,57711828 | 0,028132189  |
| A_52_P365768  | NM_145354    | Nsun2         | 28114     | -0,641974395 | 7,910129032 | 2,20E-07     |
| A_55_P2152547 | NM_010859    | Myl3          | 17897     | -0,642260313 | 9,213322581 | 0,011319934  |
| A_55_P2244355 | AK010586     | 2410024N13Rik | 70000     | -0,642521337 | 8,174956989 | 0,019985949  |
| A_55_P2081323 | NM_019690    | Gnas          | 14683     | -0,643267425 | 6,890258065 | 9,82E-10     |
| A_55_P1964348 | NM_023608    | Gdpd2         | 71584     | -0,644225462 | 12,92654839 | 0,097903286  |
| A_51_P401263  | NM_177752    | Eme1          | 268465    | -0,644381935 | 8,615634409 | 0,017560336  |
| A_55_P2034230 | NM_009090    | Polr2c        | 20021     | -0,645010669 | 7,828870968 | 0,000703626  |
| A_55_P2020572 | NM_011192    | Psme3         | 19192     | -0,645269559 | 8,490086022 | 0,000482465  |
| A_51_P337856  | NM_027086    | Ubl7          | 69459     | -0,646353485 | 8,37611828  | 0,000421692  |
| A_55_P2121076 | NM_029402    | Cul2          | 71745     | -0,64672973  | 9,070397849 | 0,007514904  |
| A_55_P2037235 | NM_175397    | Sp110         | 109032    | -0,646878378 | 9,07727957  | 0,002192376  |
| A_55_P2045278 | NR_033535    | Gm10845       | 100038734 | -0,647295875 | 13,65       | 0,0244440669 |
| A_55_P2015143 | NM_144881    | Hhat          | 226861    | -0,647763158 | 9,87683871  | 0,060711194  |
| A_55_P2106150 | NM_021790    | Cenpk         | 60411     | -0,648283073 | 7,811688172 | 0,00074983   |
| A_51_P338878  | NM_027571    | P2ry12        | 70839     | -0,648359175 | 9,853311828 | 0,01691429   |
| A_66_P114169  | NR_003372    | Gm7904        | 666043    | -0,648685633 | 6,888473118 | 0,000237147  |
| A_51_P359516  | NM_199223    | Rtn4rl2       | 269295    | -0,64874111  | 7,398376344 | 0,000144097  |
| A_55_P1968774 | NM_001162365 | Ptk2b         | 19229     | -0,648783784 | 9,274763441 | 0,00331333   |
| A_55_P1975266 | NM_027010    | Crygf         | 12969     | -0,649575391 | 8,304344086 | 0,017644736  |
| A_55_P2090612 | AK041413     | Pilra         | 231805    | -0,649847084 | 7,883075269 | 0,006134348  |
| A_55_P2001023 | NM_175305    | Lrrc19        | 100061    | -0,650244666 | 12,42754839 | 0,004729631  |
| A_55_P2003532 | NM_206935    | Arl9          | 384185    | -0,650905405 | 7,945075269 | 0,002877646  |
| A_51_P234140  | NM_183294    | Cdkl1         | 71091     | -0,651502134 | 9,147021505 | 0,007385676  |
| A_55_P2057851 | NM_146567    | Olfr843       | 258560    | -0,651940256 | 8,172462366 | 0,038832608  |

|               |              |               |           |              |             |             |
|---------------|--------------|---------------|-----------|--------------|-------------|-------------|
| A_51_P239924  | NM_009090    | Polr2c        | 20021     | -0,651966572 | 9,431967742 | 0,001082191 |
| A_55_P2023057 | NM_178055    | Dnajb2        | 56812     | -0,65206899  | 7,438096774 | 0,004655667 |
| A_55_P1983959 | NM_008049    | Ftl2          | 14337     | -0,653176387 | 15,59074194 | 0,00207825  |
| A_55_P2032192 | NM_001164249 | Tpm1          | 22003     | -0,65319559  | 10,05051613 | 0,011841576 |
| A_55_P2078680 | NM_001164251 | Tpm1          | 22003     | -0,654145092 | 8,881129032 | 0,012573301 |
| A_55_P2173298 | NM_177568    | Plcb2         | 18796     | -0,654196302 | 8,440193548 | 0,004458763 |
| A_52_P52303   | NM_001131020 | Gfap          | 14580     | -0,654322191 | 6,185935484 | 3,79E-06    |
| A_55_P2203141 | AK013525     | 2900011F02Rik | 72901     | -0,654369132 | 9,28016129  | 0,002469656 |
| A_55_P1985911 | NM_010919    | Nkx2-2        | 18088     | -0,654841394 | 8,307311828 | 0,003993383 |
| A_55_P2035286 | NM_010931    | Uhrf1         | 18140     | -0,655179232 | 7,277043011 | 2,23E-06    |
| A_55_P2316783 | NM_001081414 | Grm5          | 108071    | -0,655290185 | 8,678849462 | 0,004262992 |
| A_55_P2157260 | NR_033225    | Gm13375       | 433408    | -0,655588193 | 9,262086022 | 0,014478566 |
| A_55_P2149873 | NM_178684    | Mapk1ip1l     | 218975    | -0,656021337 | 8,390215054 | 0,004832101 |
| A_55_P2129776 | NM_030890    | Prrt1         | 260297    | -0,656410384 | 8,486010753 | 0,003741368 |
| A_55_P2060343 | NM_153102    | Zfp352        | 236537    | -0,656679943 | 10,51332258 | 0,012797507 |
| A_52_P230688  | NM_025620    | Rep15         | 66532     | -0,656756757 | 7,154419355 | 0,00018589  |
| A_51_P289588  | NM_009454    | Ube2e3        | 22193     | -0,656880512 | 10,72474194 | 0,012479017 |
| A_52_P317653  | NM_009799    | Car1          | 12346     | -0,656918919 | 7,353290323 | 0,000392941 |
| A_55_P1983373 | AK171276     | Ampd3         | 11717     | -0,657760313 | 8,325989247 | 0,002304948 |
| A_51_P131653  | NM_029801    | Tsacc         | 76927     | -0,657776671 | 10,23587097 | 0,01691264  |
| A_52_P583155  | NM_019661    | Ykt6          | 56418     | -0,658241821 | 8,176290323 | 0,000910043 |
| A_55_P2149382 | NM_001123367 | Gm3448        | 100041639 | -0,658314367 | 9,731548387 | 0,012486939 |
| A_55_P2242089 | AK041796     | Cog5          | 238123    | -0,65871835  | 8,83827957  | 0,007583022 |
| A_55_P1996973 | NM_029000    | Gvin1         | 74558     | -0,659443812 | 11,11986022 | 0,019585961 |
| A_55_P2004541 | NM_001110323 | Klra7         | 16638     | -0,659743243 | 7,247043011 | 0,001581864 |
| A_55_P2051596 | XM_001479558 | Gm4499        | 100043524 | -0,659974395 | 7,850806452 | 0,037298162 |
| A_55_P2164428 | NM_001033126 | Cd27          | 21940     | -0,660278805 | 9,164301075 | 0,005379642 |
| A_55_P2152607 | NM_172306    | Cyp4a12b      | 13118     | -0,660327881 | 7,970946237 | 0,001349006 |
| A_55_P2009345 | NM_172908    | Ovch2         | 244199    | -0,660997155 | 10,95615054 | 0,02173772  |
| A_55_P2032024 | NM_001081252 | Uggt2         | 66435     | -0,66120128  | 9,683935484 | 0,022904201 |
| A_55_P1955437 | NM_026066    | Cmtm5         | 67272     | -0,661569701 | 8,423010753 | 0,013188385 |
| A_55_P2015375 | NM_009446    | Tuba3a        | 22144     | -0,661703414 | 11,29995699 | 0,016024108 |
| A_55_P2163143 | NM_009870    | Cdk4          | 12567     | -0,662162873 | 11,3555914  | 0,00103393  |
| A_55_P1989996 | NM_013688    | Tcte1         | 21645     | -0,662421764 | 8,862806452 | 0,004903672 |
| A_66_P132870  | AK039020     | Fcnaos        | 545410    | -0,662540541 | 8,407817204 | 0,010583022 |
| A_55_P2061432 | NM_207262    | Scgb2b2       | 381970    | -0,662667852 | 8,318505376 | 0,004922792 |
| A_55_P2051259 | NM_001040026 | Sco1          | 52892     | -0,662875533 | 8,264655914 | 0,016645659 |
| A_52_P481279  | NM_001033460 | Drc1          | 381738    | -0,66355761  | 6,720376344 | 0,005980696 |
| A_55_P2098428 | NM_133724    | Bloc1s4       | 117197    | -0,663560455 | 7,292268817 | 9,01E-06    |
| A_55_P2117764 | NM_033509    | Vangl2        | 93840     | -0,663608108 | 8,394967742 | 0,00729665  |
| A_55_P2152872 | NM_054071    | Fgfrl1        | 116701    | -0,664036984 | 8,330258065 | 0,003359525 |
| A_55_P1958867 | NM_001112668 | Gm9790        | 100042265 | -0,664277383 | 8,819172043 | 0,000332988 |
| A_51_P371876  | NM_027230    | Zmynd8        | 228880    | -0,664536984 | 9,495860215 | 0,001224315 |
| A_55_P2013011 | XM_001477391 | Gm9588        | 672987    | -0,6645633   | 7,310365591 | 0,000474691 |
| A_52_P663704  | NM_001013384 | Podnl1        | 244550    | -0,665545519 | 10,65774194 | 0,024534413 |
| A_55_P2083401 | NM_001110239 | Acp1          | 11431     | -0,666068279 | 9,123483871 | 0,035295217 |
| A_55_P2008599 | NM_001162946 | Pcx           | 18563     | -0,667023471 | 7,29488172  | 0,001826381 |
| A_51_P463452  | NM_007981    | Acsl1         | 14081     | -0,667394026 | 7,823376344 | 0,005356493 |
| A_66_P119735  | XM_001477889 | BC049265      | 414075    | -0,667964438 | 8,487817204 | 0,006588129 |
| A_51_P229163  | NM_007762    | Crhr1         | 12921     | -0,668131579 | 8,904       | 0,008066182 |

|               |              |               |           |              |             |             |
|---------------|--------------|---------------|-----------|--------------|-------------|-------------|
| A_55_P1983988 | NM_145951    | Enox2         | 209224    | -0,668495021 | 7,487763441 | 0,00160626  |
| A_55_P1960496 | NM_025800    | Ppp1r2        | 66849     | -0,669897582 | 9,272752688 | 0,004176047 |
| A_55_P1955542 | NM_146952    | Olfr522       | 258954    | -0,669955192 | 8,995075269 | 0,006656195 |
| A_55_P1955120 | NM_173770    | Fam69c        | 240479    | -0,670302276 | 6,685956989 | 0,000100973 |
| A_55_P2262593 | AK142388     | 4930429F24Rik | 74633     | -0,670423898 | 7,447860215 | 0,00323989  |
| A_55_P1982344 | NM_001045544 | Vmn1r204      | 632793    | -0,671861309 | 7,211032258 | 1,01E-05    |
| A_55_P2146297 | NM_010725    | Lmx1b         | 16917     | -0,672160028 | 7,506741935 | 0,000386038 |
| A_66_P106536  | NM_027360    | 2010107E04Rik | 70257     | -0,672891892 | 11,83658065 | 0,000632177 |
| A_51_P295315  | NM_020033    | Ankrd2        | 56642     | -0,672901849 | 8,120204301 | 0,003720487 |
| A_55_P1984118 | NM_020014    | Gfra4         | 14588     | -0,674014936 | 13,76863441 | 0,019112373 |
| A_55_P1985313 | XM_001475212 | Gm2703        | 100040307 | -0,674109531 | 8,98955914  | 0,018928681 |
| A_55_P1987231 | NM_026928    | Fuom          | 69064     | -0,674236131 | 10,06477419 | 0,035561566 |
| A_55_P2040200 | NM_030695    | Lrba          | 80877     | -0,67487909  | 7,201473118 | 0,001657819 |
| A_55_P2027323 | NM_020585    | Golga7        | 57437     | -0,674937411 | 9,495268817 | 0,001527801 |
| A_51_P346453  | NM_153570    | Noc4l         | 100608    | -0,675315078 | 9,971494624 | 0,008256418 |
| A_55_P2101508 | NM_010205    | Fgf8          | 14179     | -0,675935989 | 9,398526882 | 0,012972073 |
| A_55_P2251082 | AK033279     | Qk            | 19317     | -0,676093883 | 8,92255914  | 0,008851613 |
| A_55_P2113738 | XM_001472127 | Gm4102        | 100042906 | -0,676441679 | 7,009913978 | 1,29E-05    |
| A_55_P2105152 | NM_025863    | Trim59        | 66949     | -0,676571835 | 7,963494624 | 0,02019634  |
| A_52_P460929  | NM_001001185 | BC048507      | 408058    | -0,677061166 | 8,785       | 1,36E-06    |
| A_55_P1977330 | NM_178744    | Zbtb1         | 268564    | -0,677347084 | 7,749193548 | 0,000603997 |
| A_55_P1964613 | AK168315     | Dnttip1       | 76233     | -0,677416785 | 9,69955914  | 0,000861161 |
| A_52_P518808  | BC027020     | Mmd           | 67468     | -0,677652205 | 8,70316129  | 0,032016351 |
| A_55_P2358399 | NR_033213    | 1700111N16Rik | 74305     | -0,677871977 | 8,910354839 | 0,007408691 |
| A_52_P640194  | NM_001033531 | Klhl32        | 212390    | -0,678551209 | 8,957182796 | 0,004841469 |
| A_51_P141818  | NM_029271    | Mrpl32        | 75398     | -0,678583926 | 8,449946237 | 0,002178796 |
| A_51_P438083  | NM_144512    | Slc6a13       | 14412     | -0,678993599 | 6,613462366 | 1,07E-08    |
| A_66_P135872  | AK019124     | 2410080I02Rik | 68248     | -0,679346373 | 8,282129032 | 0,001889265 |
| A_51_P296866  | NM_008629    | Msi1          | 17690     | -0,680785917 | 9,28372043  | 0,0018475   |
| A_51_P131216  | NM_030180    | Usp54         | 78787     | -0,680790185 | 10,84155914 | 0,020688042 |
| A_55_P2002577 | NM_010145    | Ephx1         | 13849     | -0,681405405 | 9,319806452 | 0,000260293 |
| A_55_P2416097 | AK038153     | A130082J08Rik | 320015    | -0,682271693 | 8,729064516 | 0,034018143 |
| A_51_P342716  | NM_172707    | Ppp1cb        | 19046     | -0,682318634 | 13,95629032 | 0,014369866 |
| A_55_P2032808 | NM_053166    | Trim7         | 94089     | -0,682697724 | 7,673462366 | 0,000370671 |
| A_55_P2002376 | NM_009272    | Srm           | 20810     | -0,683008535 | 9,699215054 | 0,007709699 |
| A_66_P136102  | NM_177099    | Lefty2        | 320202    | -0,683646515 | 9,469602151 | 0,021854702 |
| A_55_P2001403 | NR_003960    | Gm5478        | 432987    | -0,684041252 | 8,436182796 | 0,000862455 |
| A_55_P2225460 | AK157022     | AW555355      | 99413     | -0,684083926 | 9,900569892 | 0,008140155 |
| A_51_P164296  | NM_021475    | Adamdec1      | 58860     | -0,684307255 | 6,965129032 | 0,050232535 |
| A_55_P2159565 | NM_207030    | Tas2r131      | 387356    | -0,684633713 | 7,854290323 | 0,004926751 |
| A_51_P499061  | NM_173755    | Ube2o         | 217342    | -0,685732575 | 14,92525806 | 0,004650095 |
| A_55_P1989928 | NM_173756    | Lin52         | 217708    | -0,686170697 | 8,894698925 | 0,017824915 |
| A_55_P2186615 | NM_001110239 | Acp1          | 11431     | -0,686172831 | 8,70011828  | 0,030893129 |
| A_55_P1985623 | NM_029600    | Abcc3         | 76408     | -0,687859175 | 6,72488172  | 1,92E-06    |
| A_55_P2182700 | NM_031869    | Prkab1        | 19079     | -0,687903983 | 9,414688172 | 0,002890726 |
| A_55_P2096630 | NM_199066    | Ssxb9         | 387131    | -0,689049075 | 11,3994086  | 0,027141769 |
| A_55_P2089080 | NM_024272    | Ssbp2         | 66970     | -0,68971266  | 8,849827957 | 1,72E-05    |
| A_51_P133638  | NR_030776    | 3110021A11Rik | 67289     | -0,68987909  | 7,904537634 | 0,001539647 |
| A_55_P2006861 | NM_001081302 | Trio          | 223435    | -0,690053343 | 9,903451613 | 0,011431875 |
| A_55_P2096485 | NM_025784    | Bcs1l         | 66821     | -0,691170697 | 9,72872043  | 0,000722034 |

|               |              |               |           |              |             |             |
|---------------|--------------|---------------|-----------|--------------|-------------|-------------|
| A_55_P2158121 | NM_025312    | Sostdc1       | 66042     | -0,691562589 | 8,670408602 | 0,033838464 |
| A_66_P102919  | XM_001474831 | Gm3587        | 100041951 | -0,691598862 | 8,421537634 | 0,001337124 |
| A_55_P2097393 | NM_026132    | Txndc8        | 67402     | -0,692243954 | 9,998655914 | 0,056457095 |
| A_55_P1961908 | NM_001099324 | Gm15217       | 100041724 | -0,693322191 | 9,610903226 | 0,01411245  |
| A_55_P1994117 | NM_177396    | Ifnl3         | 338374    | -0,693452347 | 10,47548387 | 0,01952458  |
| A_55_P2076159 | NM_207301    | Wrb           | 71446     | -0,693608108 | 8,444096774 | 0,007289379 |
| A_55_P2083368 | AK144366     | Gm2044        | 100039095 | -0,693707681 | 10,29233333 | 0,008812135 |
| A_55_P2013559 | NM_010075    | Dpp6          | 13483     | -0,694277383 | 8,599301075 | 0,003038539 |
| A_55_P1953728 | NM_016701    | Nes           | 18008     | -0,694285917 | 8,842978495 | 0,006146782 |
| A_55_P2001334 | AK036897     | Gpr31b        | 436440    | -0,69445377  | 10,24563441 | 0,024565436 |
| A_55_P2169046 | NM_146444    | Olfr458       | 258436    | -0,694654339 | 9,168053763 | 0,006653067 |
| A_55_P2103626 | NM_011989    | Slc27a4       | 26569     | -0,69605192  | 9,455731183 | 0,001249263 |
| A_66_P118316  | AK006709     | 1700047G07Rik | 73323     | -0,696065434 | 8,18772043  | 0,001244574 |
| A_55_P2127991 | NM_011888    | Ccl19         | 24047     | -0,696221906 | 7,103806452 | 7,39E-08    |
| A_55_P2088325 | NM_001113470 | Ctdsp2        | 52468     | -0,697103129 | 9,163       | 0,009260178 |
| A_66_P133928  | NM_026126    | Fundc2        | 67391     | -0,698865576 | 12,7813871  | 0,006107704 |
| A_55_P1998811 | XM_001476688 | Gm3430        | 100041612 | -0,699837838 | 8,528139785 | 0,033903907 |
| A_55_P2396375 | AK007978     | 1810073O08Rik | 72285     | -0,700183499 | 10,23607527 | 0,009365983 |
| A_55_P2143070 | NM_007494    | Ass1          | 11898     | -0,700487909 | 9,493569892 | 0,002606548 |
| A_55_P2106844 | XM_001476912 | Gm7475        | 665070    | -0,70055761  | 9,449935484 | 0,01847371  |
| A_55_P2067707 | NM_008585    | Mep1a         | 17287     | -0,700569701 | 7,049978495 | 0,000703425 |
| A_51_P358872  | NM_174853    | Disc1         | 244667    | -0,701189189 | 7,957064516 | 0,000724799 |
| A_55_P1972663 | NM_001039889 | Smok3b        | 622474    | -0,701282361 | 8,250043011 | 9,66E-05    |
| A_55_P2046499 | NM_134228    | Vmn1r70       | 171262    | -0,701490754 | 11,42866667 | 0,011479743 |
| A_55_P2177112 | NM_022999    | Prrg2         | 65116     | -0,701948791 | 8,008354839 | 8,45E-05    |
| A_52_P42245   | NM_010737    | Klrb1a        | 17057     | -0,702060455 | 6,887634409 | 0,000224084 |
| A_55_P2044385 | NM_028263    | Fgfbp3        | 72514     | -0,703157895 | 9,987655914 | 0,038521367 |
| A_55_P2120596 | NR_003364    | BC018473      | 193217    | -0,703586771 | 7,730946237 | 0,000102518 |
| A_55_P2149615 | NM_009750    | Ngfrap1       | 12070     | -0,703658606 | 11,53473118 | 0,007680669 |
| A_55_P2312144 | AK046489     | B230398E01Rik | 109334    | -0,70479872  | 8,758139785 | 0,004236611 |
| A_55_P1964842 | NM_133752    | Opa1          | 74143     | -0,704874822 | 9,958763441 | 0,000861161 |
| A_55_P2088690 | XM_001478162 | Gm3652        | 100042078 | -0,705549787 | 7,918752688 | 0,003433785 |
| A_55_P1991931 | NM_025533    | Nosip         | 66394     | -0,70571266  | 7,823096774 | 2,16E-06    |
| A_55_P1963031 | NM_028779    | Ampd2         | 109674    | -0,706037696 | 9,312311828 | 0,002711386 |
| A_55_P2357303 | AK017255     | 5430401H09Rik | 100504461 | -0,706868421 | 7,698913978 | 0,008276428 |
| A_51_P310949  | NM_008911    | Ppox          | 19044     | -0,707985775 | 10,4351828  | 0,009701568 |
| A_55_P2158384 | NM_009591    | Aanat         | 11298     | -0,708193457 | 10,67233333 | 0,011207284 |
| A_55_P1984770 | NM_026050    | Fam220a       | 67238     | -0,708641536 | 15,43239785 | 0,014946212 |
| A_55_P2083894 | XM_001478221 | Gm3697        | 100042151 | -0,709045519 | 6,560129032 | 6,51E-05    |
| A_51_P521052  | NM_029627    | Ly6k          | 76486     | -0,70985064  | 8,870698925 | 0,002806708 |
| A_55_P2312783 | AK050884     | D030029J20Rik | 100502854 | -0,710064011 | 10,02363441 | 0,011237726 |
| A_51_P485240  | NM_028320    | Adipor1       | 72674     | -0,710147937 | 13,25946237 | 0,002252588 |
| A_51_P465148  | NM_007798    | Ctsb          | 13030     | -0,71020128  | 12,38794624 | 0,000466113 |
| A_52_P654752  | NM_029839    | Trub1         | 72133     | -0,710311522 | 9,98227957  | 0,009816134 |
| A_55_P1983095 | NM_009616    | Adam19        | 11492     | -0,710876245 | 9,966935484 | 8,91E-06    |
| A_55_P2024595 | NM_001033436 | Atxn7l1       | 380753    | -0,710890469 | 9,607397849 | 0,000632087 |
| A_55_P2047047 | AK019009     | Pla2g1b       | 18778     | -0,711497155 | 9,937967742 | 0,008140155 |
| A_55_P2301058 | AK043315     | C78653        | 97640     | -0,711504979 | 8,460172043 | 0,002347187 |
| A_51_P151835  | NM_001110013 | Tmtc3         | 237500    | -0,712256046 | 8,330784946 | 0,009955774 |
| A_52_P510877  | NM_009743    | Bcl2l1        | 12048     | -0,713687767 | 9,279172043 | 0,009896288 |



|               |              |               |           |              |             |             |
|---------------|--------------|---------------|-----------|--------------|-------------|-------------|
| A_55_P2139640 | NM_015792    | Fbxo18        | 50755     | -0,71429303  | 7,327795699 | 8,65E-05    |
| A_55_P2174977 | BC045114     | Cngb1         | 333329    | -0,71494808  | 8,325537634 | 0,001331077 |
| A_55_P2131153 | NM_009211    | Smarcc1       | 20588     | -0,715553343 | 11,75616129 | 0,016148366 |
| A_55_P1973006 | NM_001171739 | Bag1          | 12017     | -0,715554765 | 12,48010753 | 0,001968394 |
| A_55_P2048022 | NR_003631    | Gm6578        | 625347    | -0,715625889 | 8,359419355 | 0,002133748 |
| A_55_P1953402 | NM_029993    | Mlana         | 77836     | -0,716253201 | 9,969709677 | 0,008140155 |
| A_51_P414115  | NM_172607    | Naprt         | 223646    | -0,716317923 | 7,220763441 | 1,80E-05    |
| A_52_P116006  | NM_010266    | Gda           | 14544     | -0,717470839 | 10,83668817 | 0,064741752 |
| A_55_P2172822 | AK008925     | Mettl7a1      | 70152     | -0,71779872  | 9,167795699 | 0,024940018 |
| A_55_P2149511 | NM_029409    | Mff           | 75734     | -0,717906117 | 11,23223656 | 0,001882927 |
| A_55_P2166414 | NM_197979    | Uqcr10        | 66152     | -0,718456615 | 10,89843011 | 0,000127247 |
| A_55_P2115442 | NM_053109    | Clec2d        | 93694     | -0,719067568 | 9,64783871  | 0,000461746 |
| A_55_P2168014 | NM_145404    | Prmt7         | 214572    | -0,719164296 | 7,747182796 | 0,002995231 |
| A_55_P1978316 | NM_001081127 | Adamts14      | 237360    | -0,719428876 | 7,704182796 | 0,00041788  |
| A_55_P2024835 | NR_033570    | Gm7104        | 633093    | -0,720415363 | 6,411397849 | 3,13E-10    |
| A_55_P1992487 | XM_888318    | Gm6453        | 623818    | -0,720475818 | 9,020612903 | 0,002155212 |
| A_55_P1987953 | NM_001085534 | Gm5938        | 546335    | -0,720532717 | 9,146462366 | 0,012028696 |
| A_55_P2008258 | NM_001040399 | Larp1b        | 214048    | -0,721177098 | 8,347107527 | 0,003974622 |
| A_55_P2043833 | NM_001081011 | Srgap2        | 14270     | -0,722137269 | 11,8798172  | 0,011342466 |
| A_55_P2079967 | NM_008580    | Map3k5        | 26408     | -0,72236202  | 9,604322581 | 0,005057535 |
| A_66_P117204  | AK041468     | A630012P03Rik | 100504594 | -0,72297155  | 8,340784946 | 0,000565725 |
| A_51_P501069  | NM_011465    | Spta1         | 20739     | -0,723417496 | 9,453430108 | 0,053677034 |
| A_51_P456721  | NM_013478    | Azgp1         | 12007     | -0,72359175  | 6,923344086 | 2,42E-08    |
| A_55_P1972322 | NM_009770    | Btg3          | 12228     | -0,725849929 | 10,83849462 | 0,006679782 |
| A_66_P111660  | NM_013602    | Mt1           | 17748     | -0,726828592 | 9,280505376 | 0,014678369 |
| A_55_P2131163 | AK173092     | Sv2c          | 75209     | -0,727904694 | 7,358333333 | 0,000100973 |
| A_55_P2045437 | NM_177629    | Fam216b       | 219170    | -0,728103129 | 7,173333333 | 0,000814406 |
| A_51_P150489  | NM_031378    | Gsdmc         | 83492     | -0,72833926  | 9,086408602 | 0,010763783 |
| A_52_P169901  | NM_001009949 | Slc25a51      | 230125    | -0,72933357  | 10,99282796 | 0,062910245 |
| A_55_P2030209 | NM_025854    | Cir1          | 66935     | -0,729556899 | 8,905387097 | 0,008336111 |
| A_55_P2048550 | NM_001127686 | Hbb-bh2       | 436003    | -0,729790185 | 6,985569892 | 0,018199745 |
| A_51_P291819  | NM_024210    | 2310033P09Rik | 67862     | -0,730118065 | 10,78867742 | 0,017750077 |
| A_55_P1959091 | NM_031193    | Ren2          | 19702     | -0,730605263 | 10,26576344 | 0,010243162 |
| A_52_P414420  | NM_033623    | Dcun1d1       | 114893    | -0,731113798 | 10,02304301 | 0,033633045 |
| A_55_P2063047 | XM_001472600 | Gm14206       | 100041796 | -0,731394737 | 8,697924731 | 0,0015798   |
| A_55_P1983368 | NM_001162533 | Sh3d21        | 66938     | -0,731763158 | 11,031      | 0,006963432 |
| A_55_P2005055 | NM_008820    | Pepd          | 18624     | -0,732763869 | 8,956677419 | 0,000670193 |
| A_55_P1972590 | NM_173396    | Tgif2         | 228839    | -0,734145092 | 9,608473118 | 0,027012955 |
| A_51_P517012  | NM_027912    | Tysnd1        | 71767     | -0,734248222 | 10,23807527 | 0,002575432 |
| A_55_P2114651 | AK009098     | Dynap         | 75577     | -0,734352063 | 7,605150538 | 0,001597373 |
| A_55_P2036605 | NM_021318    | Fhl5          | 57756     | -0,736007112 | 9,131096774 | 0,007157459 |
| A_51_P508770  | NM_011846    | Mmp17         | 23948     | -0,73614936  | 8,77872043  | 0,002336427 |
| A_55_P2036788 | NR_004444    | Zfhx2os       | 432855    | -0,736348506 | 11,25419355 | 0,011319321 |
| A_55_P1957729 | NM_139219    | Defb9         | 246079    | -0,736555477 | 8,579870968 | 0,003513371 |
| A_55_P2020326 | NM_013591    | Madcam1       | 17123     | -0,736567568 | 11,00591398 | 0,034804423 |
| A_52_P342159  | NM_023699    | Nfatc4        | 73181     | -0,736664296 | 9,067258065 | 0,003794455 |
| A_55_P2088846 | NM_172799    | Ttll6         | 237930    | -0,737376245 | 8,109849462 | 0,00128643  |
| A_55_P2153990 | NM_001177439 | Tldc2         | 383766    | -0,737891892 | 8,814860215 | 0,004838228 |
| A_55_P2183288 | NM_133679    | Cryzl1        | 66609     | -0,738012091 | 9,635817204 | 0,016114899 |
| A_51_P103541  | NM_001081023 | Cacna1s       | 12292     | -0,738023471 | 8,553387097 | 0,002203285 |

|               |              |               |           |              |             |             |
|---------------|--------------|---------------|-----------|--------------|-------------|-------------|
| A_55_P2136763 | XM_886587    | Gm6293        | 622178    | -0,738497155 | 9,775483871 | 0,000305168 |
| A_66_P121583  | NM_001039244 | Gm7120        | 633640    | -0,73863798  | 9,10616129  | 0,002052628 |
| A_55_P1997534 | NM_001101463 | Gm4871        | 231885    | -0,739870555 | 8,531075269 | 0,003995783 |
| A_51_P168613  | NM_001004363 | Nuak1         | 77976     | -0,741056899 | 8,804236559 | 0,003551403 |
| A_51_P358700  | NM_146902    | Olfr1221      | 258904    | -0,741237553 | 6,734408602 | 0,000132722 |
| A_51_P230507  | NM_138953    | Ell2          | 192657    | -0,74172404  | 8,943021505 | 0,01993293  |
| A_55_P1957850 | NM_025664    | Snx9          | 66616     | -0,742056899 | 7,80944086  | 0,003743553 |
| A_55_P2006634 | NM_201519    | Map4k5        | 399510    | -0,742232575 | 8,368301075 | 0,003881926 |
| A_55_P2079142 | NM_173425    | Fam124b       | 241128    | -0,743364865 | 10,36650538 | 0,011553927 |
| A_55_P2147736 | NM_011993    | Dpysl4        | 26757     | -0,743871977 | 9,07983871  | 0,001597373 |
| A_51_P148684  | NM_175006    | Pou6f2        | 218030    | -0,744343528 | 9,012516129 | 0,008157025 |
| A_55_P1973448 | NM_016875    | Ybx2          | 53422     | -0,744359886 | 10,33539785 | 0,004726453 |
| A_55_P2024909 | NM_001167746 | Dnah17        | 69926     | -0,744700569 | 11,51402151 | 0,026411408 |
| A_55_P2144210 | NM_024225    | Snx5          | 69178     | -0,745193457 | 7,936892473 | 2,35E-07    |
| A_55_P1986630 | XM_001477989 | Gm3627        | 100042018 | -0,745681366 | 8,659451613 | 0,004151928 |
| A_52_P450835  | NM_197998    | Cdpf1         | 72355     | -0,746279516 | 7,399344086 | 1,04E-12    |
| A_55_P2018949 | NM_153195    | Fbxo7         | 69754     | -0,747296586 | 12,42090323 | 0,002886871 |
| A_51_P124568  | NM_008621    | Mpp1          | 17524     | -0,747620199 | 12,41017204 | 0,041204009 |
| A_55_P1997554 | NM_080466    | Kcnn3         | 140493    | -0,747687055 | 9,334645161 | 0,0113987   |
| A_55_P1977071 | NM_028666    | Fam110a       | 73847     | -0,748128023 | 11,05197849 | 0,006866357 |
| A_52_P486322  | NM_019757    | Fzr1          | 56371     | -0,748133001 | 9,729290323 | 0,002854328 |
| A_52_P497424  | AF004109     | Aanat         | 11298     | -0,750885491 | 10,41325806 | 0,027209136 |
| A_55_P2177721 | NM_007416    | Adra1b        | 11548     | -0,751504267 | 10,79187097 | 0,015637122 |
| A_55_P2104071 | NM_001012307 | Defa23        | 497114    | -0,751890469 | 11,18077419 | 0,018411985 |
| A_55_P2122195 | NM_001033876 | Kcnk9         | 223604    | -0,753979374 | 8,929322581 | 0,053852083 |
| A_55_P2083180 | NR_026831    | Gm10272       | 16697     | -0,754605974 | 8,225139785 | 0,001026878 |
| A_55_P2050508 | NM_011465    | Spta1         | 20739     | -0,755507112 | 9,639580645 | 0,023297068 |
| A_55_P2001589 | NM_178741    | Klhl8         | 246293    | -0,757636558 | 7,779096774 | 0,002713257 |
| A_52_P183524  | NM_023440    | Tmem86b       | 68255     | -0,75983926  | 6,499344086 | 1,56E-05    |
| A_55_P2185526 | XM_001002582 | 1700016P03Rik | 668604    | -0,760782361 | 12,04169892 | 0,022755577 |
| A_66_P130634  | NM_021288    | Tyms          | 22171     | -0,761109531 | 7,422333333 | 0,00018589  |
| A_52_P457529  | NM_177069    | Fbxw21        | 320082    | -0,761110953 | 11,39227957 | 0,007216016 |
| A_51_P267700  | NM_026860    | Gkn3          | 68888     | -0,761222617 | 9,17455914  | 0,001817248 |
| A_55_P2061796 | AK007238     | 1700122H20Rik | 73617     | -0,762344239 | 8,730666667 | 0,005997106 |
| A_55_P2089840 | NM_001136070 | Eif2d         | 16865     | -0,762965861 | 8,547172043 | 0,000680238 |
| A_55_P2082688 | NM_021515    | Ak1           | 11636     | -0,764307966 | 8,108946237 | 0,00042654  |
| A_55_P2117681 | NM_026406    | Rnf115        | 67845     | -0,764722617 | 8,811774194 | 0,000192287 |
| A_51_P159612  | NM_019487    | Hebp2         | 56016     | -0,765598862 | 8,499655914 | 0,00373827  |
| A_51_P481768  | NM_018756    | Tcstv1        | 54382     | -0,765623044 | 6,998741935 | 0,000114838 |
| A_55_P2136765 | NM_197979    | Uqcr10        | 66152     | -0,765800142 | 9,464548387 | 9,83E-05    |
| A_55_P2199040 | AK038608     | LOC102635358  | 102635358 | -0,766242532 | 8,288827957 | 0,001565396 |
| A_55_P2025463 | NM_001081315 | Brpf3         | 268936    | -0,766852063 | 8,463290323 | 0,003462536 |
| A_55_P2096797 | NM_001040696 | Nlrp1b        | 637515    | -0,768734708 | 8,200634409 | 0,00023357  |
| A_51_P421303  | NM_026769    | Caly          | 68566     | -0,768751067 | 9,174516129 | 0,001952413 |
| A_55_P2105220 | NM_153571    | Hscb          | 100900    | -0,768772404 | 12,28370968 | 0,022960184 |
| A_55_P2096768 | NM_009027    | Rasgrf2       | 19418     | -0,768837838 | 7,990236559 | 0,000293238 |
| A_55_P2109003 | AK040967     | Gm4117        | 100042940 | -0,769250356 | 8,102645161 | 0,00018098  |
| A_55_P2170349 | NM_053152    | Klra22        | 93969     | -0,7696899   | 8,518032258 | 0,008814532 |
| A_51_P205968  | NM_026912    | Snx15         | 69024     | -0,770252489 | 10,27226882 | 0,075962053 |
| A_52_P136751  | NM_007886    | Dtnb          | 13528     | -0,770612376 | 8,018666667 | 0,006342583 |

|               |              |               |           |              |             |             |
|---------------|--------------|---------------|-----------|--------------|-------------|-------------|
| A_51_P263667  | NM_007391    | Acrv1         | 11451     | -0,771121622 | 7,986419355 | 0,002181944 |
| A_55_P2080756 | NM_001011749 | Olf704        | 257902    | -0,771345661 | 11,86545161 | 0,063663897 |
| A_55_P2025746 | NM_007401    | Adam5         | 11499     | -0,771687767 | 8,853021505 | 0,005935623 |
| A_55_P2031636 | NM_010512    | Igf1          | 16000     | -0,771981508 | 8,576419355 | 0,000663712 |
| A_55_P2162432 | NR_027847    | D630029K05Rik | 103175    | -0,772093172 | 7,842698925 | 0,000637663 |
| A_55_P1972381 | NM_008127    | Gjb4          | 14621     | -0,772275249 | 6,571817204 | 0,031959653 |
| A_55_P2129578 | NM_001162924 | Pkp3          | 56460     | -0,773826458 | 11,60668817 | 0,002214985 |
| A_55_P2097869 | NM_172862    | Frem2         | 242022    | -0,774029161 | 9,562526882 | 0,004164362 |
| A_51_P477419  | NM_008688    | Nfic          | 18029     | -0,774428165 | 11,42894624 | 0,006426624 |
| A_55_P2091323 | NM_145514    | Wdr26         | 226757    | -0,7744367   | 8,150623656 | 0,004876468 |
| A_52_P190405  | NM_010509    | Ifnar2        | 15976     | -0,775912518 | 9,018344086 | 1,06E-07    |
| A_55_P2258832 | AK030345     | 5230400M03Rik | 100502767 | -0,776208393 | 9,09716129  | 0,007680669 |
| A_51_P433584  | NM_138681    | Bcas3         | 192197    | -0,777162162 | 9,364612903 | 0,002739454 |
| A_52_P67212   | NR_015605    | 2900052N01Rik | 73040     | -0,777788051 | 11,34595699 | 0,029305293 |
| A_55_P1993728 | NM_001161627 | Tmem116       | 77462     | -0,778760313 | 10,46970968 | 0,018765085 |
| A_55_P2004208 | NM_007847    | Defa-rs2      | 13222     | -0,778872688 | 8,594462366 | 0,050946174 |
| A_55_P2014531 | NM_033041    | Hes7          | 84653     | -0,778911807 | 8,892483871 | 0,004908543 |
| A_52_P229972  | NM_009202    | Slc22a1       | 20517     | -0,780174253 | 9,369268817 | 0,004472205 |
| A_55_P2140107 | NM_009995    | Cyp21a1       | 13079     | -0,780399716 | 8,887247312 | 0,00123819  |
| A_51_P422124  | NM_053090    | Fam126a       | 84652     | -0,781065434 | 8,311086022 | 2,26E-06    |
| A_55_P2066017 | XM_001478769 | Gm4015        | 100042759 | -0,782273115 | 6,39844086  | 2,64E-08    |
| A_51_P235726  | NM_023892    | Icam4         | 78369     | -0,783792319 | 6,668021505 | 5,49E-07    |
| A_55_P2128324 | NM_153489    | Ubap2l        | 74383     | -0,784403272 | 10,03343011 | 0,013911465 |
| A_55_P2091985 | NM_177366    | Gpr157        | 269604    | -0,785081081 | 12,64131183 | 0,076886704 |
| A_51_P209319  | NM_016752    | Slc35b1       | 110172    | -0,785291607 | 8,717354839 | 1,23E-06    |
| A_51_P299062  | NM_032540    | Kel           | 23925     | -0,786128023 | 9,784741935 | 0,008288309 |
| A_51_P234544  | NM_018745    | Azin1         | 54375     | -0,786842817 | 10,99622581 | 0,006850115 |
| A_51_P177491  | NM_023182    | Ctrl          | 109660    | -0,787213371 | 8,46872043  | 0,002713257 |
| A_55_P2409306 | AK035840     | 9030624J02Rik | 71517     | -0,787441679 | 8,738591398 | 0,001468406 |
| A_55_P2032458 | XM_893730    | Gm6934        | 628919    | -0,788710526 | 8,372634409 | 9,81E-05    |
| A_55_P2145449 | NM_172260    | Cep68         | 216543    | -0,788891181 | 7,661806452 | 0,000915211 |
| A_55_P2117630 | NM_030093    | Snrnp25       | 78372     | -0,789138691 | 9,336451613 | 0,004822978 |
| A_55_P1976574 | NM_016712    | Tmod4         | 50874     | -0,789458748 | 8,861354839 | 0,007183974 |
| A_55_P1965902 | NM_145501    | Pi4k2a        | 84095     | -0,789935277 | 9,244344086 | 0,002173091 |
| A_55_P2366358 | AK086457     | 4930444F02Rik | 73968     | -0,792669986 | 7,891483871 | 0,001768365 |
| A_55_P2073915 | BC083183     | Nos1          | 18125     | -0,793519915 | 10,05286022 | 0,006339946 |
| A_51_P312846  | NM_023605    | Fbxo9         | 71538     | -0,794044808 | 11,61702151 | 0,009542868 |
| A_55_P2123331 | NM_029746    | Cog2          | 76332     | -0,794376956 | 10,97396774 | 0,037569276 |
| A_55_P2159885 | NM_001166584 | Tead1         | 21676     | -0,794738265 | 10,55931183 | 0,018400553 |
| A_52_P334796  | NM_001008499 | Taar4         | 209513    | -0,795181366 | 12,08806452 | 0,029928889 |
| A_55_P2157705 | NM_197979    | Uqcr10        | 66152     | -0,795198435 | 10,01141935 | 2,54E-05    |
| A_55_P2026340 | NM_001161765 | Fmo5          | 14263     | -0,796136558 | 7,752462366 | 0,000576091 |
| A_55_P2043862 | NM_019641    | Stmn1         | 16765     | -0,796297297 | 10,0833871  | 0,000480072 |
| A_55_P2064457 | NM_001038655 | Gng7          | 14708     | -0,796784495 | 8,096473118 | 0,0016674   |
| A_66_P110088  | XM_001476538 | Gm3265        | 100041308 | -0,79780441  | 8,785924731 | 0,000655102 |
| A_51_P122035  | NM_153578    | Nipa1         | 233280    | -0,798310811 | 7,539784946 | 0,001139588 |
| A_55_P2113439 | NM_021371    | Caln1         | 140904    | -0,799041963 | 10,71215054 | 0,016865248 |
| A_55_P2000148 | NM_175138    | Dnaic1        | 68922     | -0,799884068 | 8,177322581 | 0,000442377 |
| A_55_P2079520 | NM_008621    | Mpp1          | 17524     | -0,80213229  | 11,70384946 | 0,034598586 |
| A_55_P2066927 | AK088379     | Galt          | 14430     | -0,804607397 | 9,141301075 | 0,00090985  |

|               |              |               |        |              |             |             |
|---------------|--------------|---------------|--------|--------------|-------------|-------------|
| A_55_P2132800 | AK041361     | Zfp367        | 238673 | -0,805396871 | 9,913462366 | 0,002154518 |
| A_52_P318673  | NM_009117    | Saa1          | 20208  | -0,805516358 | 9,443946237 | 0,000780916 |
| A_55_P2102155 | NM_001177795 | Rgs20         | 58175  | -0,805604552 | 11,2796129  | 0,00676609  |
| A_66_P124136  | AK039088     | Prkx          | 19108  | -0,805763158 | 11,07011828 | 0,003920269 |
| A_55_P2009066 | NM_001166029 | Cfap74        | 544678 | -0,80705761  | 13,23919355 | 0,003901726 |
| A_55_P1960208 | NM_172955    | Vcan          | 13003  | -0,807293741 | 8,766268817 | 0,000621601 |
| A_51_P368009  | NM_177733    | E2f2          | 242705 | -0,808860597 | 13,87454839 | 0,001726586 |
| A_55_P2154982 | NM_009858    | Cd8b1         | 12526  | -0,8090633   | 11,1763871  | 0,002214985 |
| A_55_P2210301 | AK047689     | Gm12992       | 545681 | -0,810416074 | 9,284258065 | 0,000721792 |
| A_55_P2094831 | NM_021471    | Slco1c1       | 58807  | -0,810869132 | 7,249634409 | 0,000123773 |
| A_55_P2004527 | NM_010650    | Klra8         | 16639  | -0,811043385 | 7,233548387 | 2,21E-06    |
| A_51_P117477  | NM_011977    | Slc27a1       | 26457  | -0,812327881 | 10,305      | 0,019180584 |
| A_55_P1960423 | AK018877     | Atp8b3        | 67331  | -0,813276671 | 9,702139785 | 0,004671707 |
| A_55_P2168185 | XM_357571    | Gm5299        | 384325 | -0,81434495  | 15,09376344 | 5,49E-07    |
| A_66_P130449  | NM_207270    | Ptprh         | 545902 | -0,817214794 | 7,813795699 | 0,001331077 |
| A_51_P348617  | NM_001145552 | 2310045N01Rik | 72368  | -0,819171408 | 11,22434409 | 3,83E-05    |
| A_52_P510202  | NR_030696    | 9930014A18Rik | 320469 | -0,819857752 | 9,588903226 | 0,006155703 |
| A_51_P273005  | NM_009611    | Act17a        | 11470  | -0,820296586 | 7,259817204 | 9,49E-05    |
| A_55_P2049867 | NM_017466    | Ccrl2         | 54199  | -0,821405405 | 8,438408602 | 0,000210563 |
| A_55_P2094060 | NM_010370    | Gzma          | 14938  | -0,823670697 | 11,87929032 | 0,005836692 |
| A_55_P1953545 | NM_010238    | Brd2          | 14312  | -0,825062589 | 7,847182796 | 0,000895957 |
| A_66_P122155  | NM_145514    | Wdr26         | 226757 | -0,82633357  | 10,44464516 | 0,004698586 |
| A_55_P2009774 | NM_009573    | Zic1          | 22771  | -0,826561878 | 8,307516129 | 5,41E-05    |
| A_55_P1978681 | NM_146010    | Tspan8        | 216350 | -0,826827881 | 6,743462366 | 1,33E-06    |
| A_66_P132446  | NM_027604    | Usp15         | 14479  | -0,828417496 | 7,13688172  | 0,000259143 |
| A_51_P351860  | NM_009777    | C1qb          | 12260  | -0,829073257 | 9,042096774 | 0,006129274 |
| A_66_P103398  | NM_001081079 | Ogfr1         | 70155  | -0,829331437 | 8,16483871  | 0,001137428 |
| A_55_P1955243 | NM_011297    | Rps24         | 20088  | -0,830582504 | 8,708053763 | 3,54E-05    |
| A_66_P133397  | NM_145126    | Chil4         | 104183 | -0,831089616 | 9,483387097 | 0,001745185 |
| A_55_P2023562 | NM_199225    | Cd300c        | 387565 | -0,83197724  | 9,83683871  | 0,004994017 |
| A_55_P2018111 | NM_001101479 | Pabpc4l       | 241989 | -0,832118777 | 8,733989247 | 0,005713854 |
| A_55_P2030938 | NM_025863    | Trim59        | 66949  | -0,832266714 | 8,757397849 | 0,002443021 |
| A_51_P439612  | NM_020266    | Dnajb2        | 56812  | -0,834509957 | 10,0616129  | 0,005836919 |
| A_51_P329370  | NM_030093    | Snrnp25       | 78372  | -0,835009246 | 11,04274194 | 0,002762425 |
| A_66_P111594  | NM_053223    | V1ra8         | 113850 | -0,836596728 | 7,290741935 | 7,63E-05    |
| A_55_P2022094 | NM_001171053 | Mta3          | 116871 | -0,836708393 | 9,374021505 | 0,000565725 |
| A_55_P1997997 | NM_024470    | Klra23        | 79410  | -0,837096017 | 6,860870968 | 9,01E-07    |
| A_55_P2011991 | NM_022332    | St7           | 64213  | -0,837522048 | 9,251268817 | 0,002228672 |
| A_55_P2041634 | NM_001081041 | Vps51         | 68505  | -0,838029161 | 11,69860215 | 0,013945293 |
| A_55_P2000813 | NM_009939    | Cops2         | 12848  | -0,838215505 | 7,97355914  | 0,000295239 |
| A_55_P2094626 | NM_175211    | Ralgps1       | 241308 | -0,838349218 | 8,479505376 | 1,70E-06    |
| A_55_P1956812 | NM_178618    | Fam83g        | 69640  | -0,838594595 | 6,984731183 | 8,07E-06    |
| A_55_P1963175 | NM_145835    | Lctl          | 235435 | -0,839503556 | 7,725376344 | 0,000233182 |
| A_55_P2228327 | AK085171     | 4921529L05Rik | 320178 | -0,840860597 | 8,842086022 | 0,001554104 |
| A_55_P2057031 | NM_144867    | Slmo1         | 225655 | -0,842614509 | 9,227795699 | 0,000337806 |
| A_55_P2152901 | AK013627     | 2900040C04Rik | 72893  | -0,843079659 | 10,72821505 | 0,005157386 |
| A_66_P126332  | NM_001110508 | Zfp703        | 353310 | -0,843142248 | 12,04184946 | 0,0037936   |
| A_55_P2067798 | NM_207543    | Vmn1r59       | 404284 | -0,843502845 | 9,79872043  | 0,003697237 |
| A_55_P2021953 | NM_146600    | Olfr700       | 258593 | -0,843819346 | 11,64025806 | 0,018504096 |
| A_51_P159711  | NM_053070    | Car7          | 12354  | -0,844347084 | 11,43731183 | 0,001704777 |

|               |              |               |           |              |             |             |
|---------------|--------------|---------------|-----------|--------------|-------------|-------------|
| A_55_P1958697 | NM_028234    | Rbm33         | 381626    | -0,845562589 | 9,227870968 | 0,000637663 |
| A_55_P2074045 | XM_001478164 | Gm3655        | 100042085 | -0,84579872  | 9,703946237 | 0,001479762 |
| A_55_P2080163 | NM_025821    | Carhsp1       | 52502     | -0,846448791 | 15,02537634 | 0,000177416 |
| A_55_P2050932 | NM_133211    | Tlr7          | 170743    | -0,846449502 | 9,916849462 | 0,000405908 |
| A_55_P2077009 | NM_207223    | Acap3         | 140500    | -0,848414651 | 10,48107527 | 0,001691984 |
| A_51_P466591  | AK005436     | 1600012P17Rik | 72025     | -0,848808677 | 11,0261828  | 0,030283541 |
| A_55_P1959748 | NM_012055    | Asns          | 27053     | -0,848881223 | 7,98644086  | 0,000657    |
| A_52_P608132  | NM_001024560 | Snx32         | 225861    | -0,850509246 | 9,384408602 | 0,000937595 |
| A_51_P134030  | NM_145210    | Oas1e         | 231699    | -0,851192745 | 6,724075269 | 1,63E-08    |
| A_51_P308549  | NM_021422    | Dnaja4        | 58233     | -0,851731863 | 6,647698925 | 4,85E-10    |
| A_55_P2063785 | NM_001110783 | Ank1          | 11733     | -0,851797297 | 7,996225806 | 0,007554911 |
| A_55_P2089362 | NM_001012704 | Wfdc13        | 408190    | -0,851838549 | 10,21766667 | 0,003804355 |
| A_55_P2136786 | NM_133906    | Zkscan1       | 74570     | -0,851997155 | 14,44917204 | 0,00604429  |
| A_55_P2070347 | NM_008503    | Rps2          | 16898     | -0,852240398 | 11,90297849 | 0,000680238 |
| A_55_P2166123 | NM_015731    | Atp9a         | 11981     | -0,852662162 | 11,53253763 | 0,010129967 |
| A_51_P480861  | NM_021453    | Pga5          | 58803     | -0,853918919 | 8,210537634 | 0,00040615  |
| A_55_P1993473 | NM_001081657 | Gm5935        | 546282    | -0,855515647 | 11,72068817 | 0,012118422 |
| A_55_P2208579 | NM_194268    | Onecut2       | 225631    | -0,857473684 | 10,6531828  | 0,007734395 |
| A_55_P1968643 | NM_001166718 | Vmn1r173      | 545934    | -0,857780939 | 10,18056989 | 0,006703928 |
| A_66_P136632  | NM_019769    | Chp1          | 56398     | -0,859330725 | 7,636494624 | 0,000365569 |
| A_55_P2063166 | NM_177767    | Ogfod1        | 270086    | -0,861878378 | 10,8812043  | 1,69E-05    |
| A_55_P2117425 | NM_016908    | Syt5          | 53420     | -0,862268137 | 7,443473118 | 6,53E-06    |
| A_52_P612382  | NM_023117    | Cdc25b        | 12531     | -0,862694879 | 12,35034409 | 0,072583671 |
| A_55_P1964245 | NM_146959    | Olfr631       | 258961    | -0,86571266  | 9,539784946 | 0,004291858 |
| A_55_P2058871 | NM_138604    | Otud5         | 54644     | -0,866162162 | 11,9087957  | 0,00040845  |
| A_55_P2073709 | NM_178667    | Tfdp2         | 211586    | -0,86721266  | 12,3305914  | 0,020985785 |
| A_55_P2014570 | NM_001164581 | Zfp961        | 234413    | -0,871625178 | 10,7188172  | 0,006840656 |
| A_51_P433388  | NM_027070    | 1700019A02Rik | 69397     | -0,872396159 | 10,04567742 | 0,019936242 |
| A_51_P418147  | NM_181420    | Fn3krp        | 238024    | -0,87277027  | 6,529537634 | 0,001821257 |
| A_51_P196972  | NM_011403    | Slc4a1        | 20533     | -0,872960882 | 14,05133333 | 0,030054443 |
| A_55_P2060330 | NM_199145    | 3110062M04Rik | 78412     | -0,876526316 | 11,65407527 | 0,00547353  |
| A_55_P1970154 | NM_016698    | Rnf10         | 50849     | -0,877381935 | 13,65223656 | 0,001015209 |
| A_55_P2076303 | NM_027920    | March8        | 71779     | -0,87758037  | 10,22623656 | 0,003309797 |
| A_55_P1987494 | NM_008076    | Gabrr2        | 14409     | -0,880401849 | 10,59909677 | 0,006684705 |
| A_55_P2023937 | NM_022016    | Impg1         | 63859     | -0,880509957 | 10,29701075 | 0,003567776 |
| A_55_P2081840 | NM_001126338 | Prnd          | 26434     | -0,881460171 | 9,885096774 | 0,004148293 |
| A_52_P638459  | NM_013653    | Ccl5          | 20304     | -0,885175676 | 11,92266667 | 0,022779001 |
| A_55_P1984640 | NM_026454    | Ube2f         | 67921     | -0,887140114 | 9,806419355 | 0,003185551 |
| A_55_P1963639 | NM_026716    | Sycn          | 68416     | -0,887443101 | 9,241967742 | 0,003347882 |
| A_51_P496432  | NM_007981    | Acs1l         | 14081     | -0,887773826 | 10,96396774 | 0,015556211 |
| A_55_P2117959 | NM_007823    | Cyp4b1        | 13120     | -0,888794452 | 7,939892473 | 0,006789664 |
| A_55_P2062538 | BC100504     | 1700027A15Rik | 69449     | -0,888815078 | 9,154612903 | 0,000360089 |
| A_52_P73126   | NM_013513    | Epb4.2        | 13828     | -0,889358464 | 8,670075269 | 0,010870823 |
| A_55_P1972192 | NM_008832    | Phka1         | 18679     | -0,891426031 | 6,519430108 | 5,50E-22    |
| A_51_P296608  | NM_007836    | Gadd45a       | 13197     | -0,892889047 | 9,687634409 | 9,05E-05    |
| A_52_P449417  | NM_177545    | Vangl1        | 229658    | -0,893429587 | 8,324204301 | 0,005585275 |
| A_55_P2077003 | NM_009973    | Csn1s2b       | 12992     | -0,893485775 | 10,74858065 | 0,008154611 |
| A_55_P1965448 | XM_907154    | Gm14989       | 632883    | -0,893842817 | 12,27508602 | 0,007659679 |
| A_55_P2022509 | NM_172948    | Mgat5b        | 268510    | -0,894254623 | 9,747021505 | 0,003065423 |
| A_52_P432685  | NM_146012    | Ctdsp2        | 52468     | -0,897750356 | 8,225397849 | 0,000822334 |

|               |              |               |           |              |             |             |
|---------------|--------------|---------------|-----------|--------------|-------------|-------------|
| A_55_P2185652 | NM_001146311 | Cln3          | 12752     | -0,89970128  | 10,16716129 | 0,001524035 |
| A_55_P1961127 | NR_001592    | H19           | 14955     | -0,903167852 | 10,90813978 | 0,011905883 |
| A_55_P2225470 | AK039069     | A230092J17Rik | 320669    | -0,903308677 | 8,275817204 | 0,003001033 |
| A_52_P354373  | AK012387     | 1190002F15Rik | 381822    | -0,90375889  | 9,012301075 | 0,03419085  |
| A_51_P376347  | NM_013546    | Hebp1         | 15199     | -0,907670697 | 10,08045161 | 0,029826732 |
| A_55_P2165046 | NM_145479    | Klhl22        | 224023    | -0,908757468 | 11,22037634 | 0,003292375 |
| A_55_P1972792 | NM_009185    | Stil          | 20460     | -0,908849218 | 9,022408602 | 0,00171529  |
| A_51_P516148  | NM_016984    | Trpc4         | 22066     | -0,909194879 | 8,548344086 | 0,003856848 |
| A_55_P1969152 | NM_030735    | Vmn1r172      | 81010     | -0,911330725 | 8,58311828  | 0,00099116  |
| A_55_P2020080 | XM_001479627 | Gm4326        | 100043267 | -0,91171266  | 9,479182796 | 0,000426549 |
| A_55_P1974587 | NM_177545    | Vangl1        | 229658    | -0,91285064  | 8,451172043 | 0,011266275 |
| A_51_P241769  | NM_011270    | Rhd           | 19746     | -0,913897582 | 9,136602151 | 0,019963689 |
| A_55_P2152791 | NM_001039093 | Tom1l2        | 216810    | -0,914029872 | 8,994602151 | 0,002886871 |
| A_55_P2094686 | AK078025     | 2700089E24Rik | 381820    | -0,915967283 | 7,842376344 | 3,56E-08    |
| A_55_P2043466 | NM_173363    | Eif5          | 217869    | -0,918407539 | 11,33764516 | 0,000451746 |
| A_51_P142896  | NM_007652    | Cd59a         | 12509     | -0,918963727 | 8,514623656 | 0,024356764 |
| A_52_P467046  | NM_026236    | Wdr48         | 67561     | -0,921094595 | 6,998086022 | 3,47E-08    |
| A_55_P2144364 | XM_001479624 | Gm4320        | 100043258 | -0,924311522 | 6,732       | 3,70E-07    |
| A_51_P435251  | NM_146207    | Cul4a         | 99375     | -0,925492888 | 9,651849462 | 0,007126697 |
| A_52_P676198  | NM_025912    | Fam210b       | 67017     | -0,925512802 | 9,370096774 | 0,014425248 |
| A_52_P10732   | NM_001048167 | Map6          | 17760     | -0,926603841 | 8,205860215 | 3,51E-05    |
| A_51_P498772  | NM_144953    | 1700019D03Rik | 67080     | -0,930965861 | 9,614494624 | 0,003472728 |
| A_55_P2039429 | NM_007860    | Dio1          | 13370     | -0,931139403 | 9,439935484 | 0,000975741 |
| A_52_P658034  | NM_009433    | Tspyl1        | 22110     | -0,931985775 | 10,61394624 | 4,13E-06    |
| A_51_P345046  | NM_019648    | Metap2        | 56307     | -0,933715505 | 9,867569892 | 0,002210132 |
| A_55_P2057390 | NM_028534    | Smap1         | 98366     | -0,934189189 | 11,27766667 | 0,000453042 |
| A_55_P2138422 | NM_027802    | Obox1         | 71468     | -0,934327881 | 11,83492473 | 0,020789047 |
| A_55_P2060402 | NM_153419    | Grwd1         | 101612    | -0,935600996 | 10,55280645 | 0,001965389 |
| A_52_P483959  | NM_207233    | C1ql2         | 226359    | -0,936653627 | 9,656021505 | 0,001515996 |
| A_55_P1986213 | NM_001004156 | Plekhg5       | 269608    | -0,942061878 | 9,500612903 | 0,002432284 |
| A_55_P2069842 | NM_001081232 | D5ErtD579e    | 320661    | -0,942326458 | 8,043612903 | 3,08E-09    |
| A_55_P1975903 | NM_001003961 | Dnmt3b        | 13436     | -0,942954481 | 9,615376344 | 0,000624268 |
| A_66_P111089  | NM_026454    | Ube2f         | 67921     | -0,943973684 | 8,496354839 | 0,001652103 |
| A_55_P1971054 | NM_198414    | Paqr9         | 75552     | -0,945387624 | 7,281913978 | 0,000232086 |
| A_55_P2085716 | NM_026217    | Atg12         | 67526     | -0,945679943 | 9,189365591 | 3,64E-07    |
| A_55_P2117028 | NM_028860    | Mtmr3         | 74302     | -0,946213371 | 10,4072043  | 0,00025578  |
| A_55_P2140546 | NM_001009949 | Slc25a51      | 230125    | -0,946801565 | 8,645473118 | 0,003477948 |
| A_55_P1999108 | NM_010031    | Defa1         | 13216     | -0,947170697 | 10,38502151 | 0,000744909 |
| A_55_P2166069 | NM_027173    | 2310079G19Rik | 69699     | -0,94736771  | 11,39507527 | 0,002869318 |
| A_51_P455647  | NM_009801    | Car2          | 12349     | -0,949194168 | 11,67104301 | 0,060907594 |
| A_55_P2200628 | AK014629     | 4733401D01Rik | 70847     | -0,950153627 | 10,61227957 | 0,000861161 |
| A_55_P2042184 | XM_001476516 | Gm3181        | 100041175 | -0,950299431 | 6,713268817 | 1,70E-06    |
| A_51_P133097  | NR_033452    | Gm4013        | 100042757 | -0,95127596  | 8,665860215 | 0,000172238 |
| A_51_P418737  | AK014289     | Rbm33         | 381626    | -0,952756757 | 7,693892473 | 8,71E-07    |
| A_55_P2026014 | NM_013596    | Mc5r          | 17203     | -0,954484353 | 8,954096774 | 0,003167206 |
| A_55_P2045812 | NM_011014    | Sigmar1       | 18391     | -0,956039829 | 9,744806452 | 0,024439976 |
| A_51_P441745  | AK021396     | E130119H09Rik | 78550     | -0,959279516 | 9,768860215 | 0,009222927 |
| A_55_P1991075 | NM_029624    | Lmf1          | 76483     | -0,961992888 | 8,572806452 | 0,000200325 |
| A_66_P111449  | AK142058     | 1700018A04Rik | 71307     | -0,963871266 | 10,27831183 | 0,003247355 |
| A_55_P2063376 | NM_013458    | Add2          | 11519     | -0,964320768 | 8,201322581 | 0,000482465 |

|               |              |               |           |              |             |             |
|---------------|--------------|---------------|-----------|--------------|-------------|-------------|
| A_55_P2168254 | XM_001478363 | Gm3880        | 100042516 | -0,96572404  | 7,502784946 | 0,001581758 |
| A_55_P2144781 | NM_173421    | Erich5        | 239368    | -0,966686344 | 9,634913978 | 0,001110428 |
| A_55_P2145029 | NM_001033411 | Gm826         | 329554    | -0,967810811 | 10,20091398 | 0,006564942 |
| A_55_P2109554 | NM_012032    | Serinc3       | 26943     | -0,969067568 | 11,00091398 | 0,018641861 |
| A_55_P2101910 | NM_009438    | Rpl13a        | 22121     | -0,977743243 | 8,513010753 | 1,04E-09    |
| A_52_P412452  | NM_017383    | Cntn6         | 53870     | -0,982279516 | 11,10955914 | 0,002806506 |
| A_55_P2105140 | NM_001177731 | Mrap2         | 244958    | -0,984886202 | 8,738537634 | 0,000405238 |
| A_55_P2063965 | NM_008156    | Gpld1         | 14756     | -0,984999289 | 7,805763441 | 0,000369478 |
| A_55_P2008021 | NM_026838    | Srpx2         | 68792     | -0,986204125 | 9,982225806 | 0,000429691 |
| A_55_P1980041 | NM_008468    | Kpna6         | 16650     | -0,986989331 | 10,97854839 | 0,008005861 |
| A_52_P87503   | NM_001033981 | Hbq1b         | 544763    | -0,994050498 | 12,51366667 | 0,000556903 |
| A_55_P2113498 | NM_010654    | Klrd1         | 16643     | -0,995142959 | 7,545376344 | 2,70E-07    |
| A_55_P2029121 | AK007848     | Pex11g        | 69129     | -0,995825747 | 8,472569892 | 3,48E-06    |
| A_55_P2179309 | NM_001122596 | A630033H20Rik | 213438    | -0,996474395 | 11,19305376 | 0,007993713 |
| A_55_P1969511 | NM_029430    | Ttc23l        | 75777     | -0,996955903 | 7,358354839 | 0,000253985 |
| A_55_P2080598 | NR_033355    | 5430416O09Rik | 71406     | -0,998312945 | 7,791064516 | 0,000835755 |
| A_51_P136781  | NM_018874    | Pnliprp1      | 18946     | -0,999578236 | 7,542741935 | 5,15E-07    |
| A_51_P128575  | NM_011681    | Scgb1a1       | 22287     | -0,99993101  | 8,229408602 | 0,000153225 |
| A_51_P272817  | NM_008928    | Map2k3        | 26397     | -1,005989331 | 9,436430108 | 7,52E-11    |
| A_51_P172251  | NM_025903    | lfrd2         | 15983     | -1,007032006 | 9,205021505 | 0,00184801  |
| A_51_P259879  | NM_173430    | Fkrp          | 243853    | -1,007896871 | 9,191333333 | 0,001933868 |
| A_55_P2083988 | NM_008505    | Lmo2          | 16909     | -1,007972973 | 11,08995699 | 9,05E-05    |
| A_52_P24631   | NM_018745    | Azin1         | 54375     | -1,008487909 | 8,449494624 | 0,000385086 |
| A_52_P77080   | NM_010369    | Gypa          | 14934     | -1,0091266   | 9,304354839 | 0,008847301 |
| A_51_P136888  | NM_009029    | Rb1           | 19645     | -1,009908962 | 10,02278495 | 7,79E-05    |
| A_55_P2052719 | NM_001085410 | Nadk2         | 68646     | -1,011450213 | 9,836032258 | 0,001494135 |
| A_51_P147034  | NM_027407    | lca1l         | 70375     | -1,011475818 | 9,800064516 | 0,095717078 |
| A_52_P650855  | NM_177390    | Myo1d         | 338367    | -1,017180654 | 8,752946237 | 0,001075404 |
| A_51_P109050  | NM_023824    | Paqr4         | 76498     | -1,017289474 | 6,675333333 | 1,41E-12    |
| A_52_P522977  | NM_024272    | Ssbp2         | 66970     | -1,019541963 | 10,57069892 | 0,002340862 |
| A_51_P111544  | NM_009273    | Srp14         | 20813     | -1,022789474 | 9,925956989 | 0,012356717 |
| A_55_P2009146 | NM_032544    | Gtpbp3        | 70359     | -1,022970839 | 10,67760215 | 0,009716064 |
| A_51_P154585  | NM_134223    | Vmn1r195      | 171257    | -1,024258179 | 12,11994624 | 0,002258409 |
| A_52_P357133  | NM_053267    | Selm          | 114679    | -1,034246088 | 9,281946237 | 0,000975503 |
| A_51_P163444  | NM_025821    | Carhsp1       | 52502     | -1,038146515 | 10,41952688 | 0,000305141 |
| A_52_P482124  | NM_026455    | Fam32a        | 67922     | -1,040001422 | 9,017419355 | 8,84E-11    |
| A_51_P311362  | AK015429     | 4930449E01Rik | 74864     | -1,040998578 | 8,125731183 | 1,27E-05    |
| A_55_P1960566 | NM_139117    | Ybx3          | 56449     | -1,042220484 | 14,42454839 | 0,001804775 |
| A_55_P2026370 | NM_027946    | Dcaf7         | 71833     | -1,046837838 | 9,181032258 | 0,000294456 |
| A_55_P2066219 | XM_001473544 | Gm3455        | 100041653 | -1,047093172 | 7,84188172  | 2,81E-06    |
| A_55_P2167123 | NR_033575    | Cyp4b1-ps2    | 631037    | -1,047844239 | 10,13049462 | 0,00835165  |
| A_52_P237652  | NR_015556    | 2610035D17Rik | 72386     | -1,051975818 | 7,53083871  | 0,000351538 |
| A_55_P1976112 | NM_178692    | C130074G19Rik | 226777    | -1,055973684 | 11,09623656 | 5,22E-05    |
| A_55_P2045886 | NM_019635    | Stk3          | 56274     | -1,063676387 | 7,498107527 | 0,000118829 |
| A_55_P1980883 | NM_001146351 | Ephb6         | 13848     | -1,06669559  | 17,04249462 | 0,070100882 |
| A_51_P513541  | NM_019437    | Rfk           | 54391     | -1,071153627 | 10,349      | 0,00112624  |
| A_55_P1988844 | NM_016970    | Klrg1         | 50928     | -1,07470128  | 7,084913978 | 1,14E-10    |
| A_52_P475870  | NM_001164686 | Tmem29        | 382245    | -1,077901138 | 7,656473118 | 1,57E-07    |
| A_51_P112627  | NM_009180    | St6galnac2    | 20446     | -1,078645804 | 7,119827957 | 0,001799063 |
| A_52_P91235   | NM_017367    | Ccni          | 12453     | -1,082279516 | 11,27198925 | 1,17E-07    |

|               |              |               |           |              |             |             |
|---------------|--------------|---------------|-----------|--------------|-------------|-------------|
| A_51_P417891  | NM_011280    | Trim10        | 19824     | -1,083508535 | 10,27753763 | 0,014946212 |
| A_55_P2087118 | NM_020498    | Ly6i          | 57248     | -1,084010669 | 7,78955914  | 6,96E-06    |
| A_55_P2005248 | NM_008627    | Meis3         | 17537     | -1,08569559  | 11,21537634 | 0,005601956 |
| A_55_P2076543 | XM_001476757 | Gm10144       | 100041121 | -1,086798009 | 10,75070968 | 0,001498965 |
| A_55_P2151855 | NM_001110239 | Acp1          | 11431     | -1,088549075 | 10,11552688 | 0,004730752 |
| A_51_P249118  | NM_008830    | Abcb4         | 18670     | -1,090727596 | 8,231688172 | 1,48E-05    |
| A_51_P342189  | AK080303     | A630091E08Rik | 233544    | -1,092405405 | 9,121774194 | 0,002026121 |
| A_66_P106388  | NM_029499    | Ms4a4c        | 64380     | -1,096945946 | 7,46816129  | 0,028250894 |
| A_55_P2279140 | AK089751     | F830014O18Rik | 403347    | -1,098949502 | 10,59693548 | 0,004103354 |
| A_65_P20167   | NM_021395    | Hyou1         | 12282     | -1,099278805 | 7,504989247 | 4,15E-05    |
| A_51_P192860  | NM_008248    | Hint1         | 15254     | -1,104090327 | 11,40463441 | 2,72E-14    |
| A_55_P2142668 | XM_001480974 | Gm4653        | 100043795 | -1,106624467 | 10,74135484 | 0,046177871 |
| A_55_P2397854 | AK019540     | 4921518K17Rik | 78758     | -1,108252489 | 9,572322581 | 0,000170074 |
| A_51_P237040  | NM_008711    | Nog           | 18121     | -1,116370555 | 10,37649462 | 0,000121537 |
| A_55_P2006698 | NR_033241    | Bmp1          | 12153     | -1,117640114 | 9,493010753 | 0,000320106 |
| A_51_P126198  | NM_010019    | Dapk2         | 13143     | -1,118079659 | 8,440397849 | 1,03E-05    |
| A_52_P313285  | AF108397     | Slc8a1        | 20541     | -1,122278094 | 7,156215054 | 1,55E-10    |
| A_55_P2078494 | NM_001080812 | Cib3          | 234421    | -1,123605263 | 6,948053763 | 7,75E-05    |
| A_55_P2167451 | NM_033569    | Cnnm2         | 94219     | -1,126099573 | 7,94727957  | 1,38E-05    |
| A_55_P2003592 | BC059910     | Unkl          | 74154     | -1,126247511 | 8,496688172 | 7,63E-05    |
| A_52_P309337  | NM_019648    | Metap2        | 56307     | -1,128984353 | 7,452247312 | 2,38E-06    |
| A_55_P2139814 | AF199608     | Fgf13         | 14168     | -1,133674964 | 11,14146237 | 0,007680669 |
| A_55_P1970120 | NM_146168    | Vopp1         | 232023    | -1,14159744  | 12,89452688 | 0,000391711 |
| A_51_P300506  | NM_183405    | Cox6b2        | 333182    | -1,14236202  | 10,41512903 | 0,002394704 |
| A_66_P108685  | NM_009894    | Cideb         | 12684     | -1,153929587 | 9,268924731 | 0,001107091 |
| A_55_P2090184 | NM_026218    | Fgfr1op2      | 67529     | -1,154916785 | 10,2796129  | 3,03E-05    |
| A_55_P2155876 | NM_001113395 | Gm16501       | 100042840 | -1,159375533 | 7,603591398 | 1,65E-07    |
| A_55_P2021413 | NM_001146292 | Celf4         | 108013    | -1,161556188 | 12,32917204 | 0,004408491 |
| A_51_P221337  | NM_145824    | Ranbp10       | 74334     | -1,162499289 | 10,81552688 | 0,000401522 |
| A_55_P2054913 | NM_001011863 | Olfr406       | 258181    | -1,16820128  | 8,951516129 | 0,000934583 |
| A_51_P197378  | NM_026217    | Atg12         | 67526     | -1,171635846 | 10,8442043  | 4,19E-08    |
| A_55_P2112085 | NM_027906    | Vwa8          | 219189    | -1,187041963 | 9,987419355 | 0,000847259 |
| A_55_P2168316 | NM_001177438 | Aldh3b2       | 621603    | -1,191093883 | 6,663774194 | 0,000405908 |
| A_55_P2334424 | AK158188     | D630024D03Rik | 414116    | -1,19227027  | 7,336311828 | 3,62E-05    |
| A_52_P463346  | NM_012032    | Serinc3       | 26943     | -1,195882646 | 9,65427957  | 0,002600557 |
| A_55_P2099785 | NM_027604    | Usp15         | 14479     | -1,19783357  | 10,87804301 | 0,000789401 |
| A_52_P609200  | NM_012032    | Serinc3       | 26943     | -1,218107397 | 12,70227957 | 0,012507271 |
| A_55_P2100088 | NM_001013784 | E130309D14Rik | 432582    | -1,218246799 | 6,509010753 | 1,35E-11    |
| A_55_P2150717 | NM_010136    | Eomes         | 13813     | -1,223901849 | 8,240774194 | 2,90E-10    |
| A_55_P2180096 | NM_001178039 | Gm10136       | 672214    | -1,243444523 | 12,91064516 | 1,26E-10    |
| A_55_P2038362 | NM_145444    | Acot5         | 217698    | -1,248868421 | 7,876645161 | 0,00021884  |
| A_55_P2329298 | AK087850     | Gm12758       | 100126229 | -1,252424609 | 7,788236559 | 0,000280676 |
| A_51_P485594  | NM_025729    | Tab3          | 66724     | -1,25483926  | 8,151473118 | 1,43E-05    |
| A_55_P2006148 | NM_001177438 | Aldh3b2       | 621603    | -1,255595306 | 7,010397849 | 0,001782495 |
| A_66_P104296  | NM_028275    | 1700112E06Rik | 76633     | -1,25709744  | 7,173623656 | 9,25E-11    |
| A_55_P2175579 | NM_146694    | Olfr1466      | 258689    | -1,262164296 | 11,95411828 | 0,033276522 |
| A_55_P2009116 | NR_033558    | F830002L21Rik | 414125    | -1,264285206 | 7,580956989 | 1,52E-06    |
| A_55_P2043684 | NM_133835    | Ubac1         | 98766     | -1,273254623 | 12,32345161 | 0,001191801 |
| A_55_P2178510 | NM_008561    | Mc3r          | 17201     | -1,292970128 | 9,870290323 | 0,028132189 |
| A_51_P517695  | NM_008530    | Ly6f          | 17071     | -1,309403272 | 7,727688172 | 6,95E-08    |



|               |              |               |           |              |             |             |
|---------------|--------------|---------------|-----------|--------------|-------------|-------------|
| A_52_P493620  | NM_026218    | Fgfr1op2      | 67529     | -1,321456615 | 9,218623656 | 3,29E-06    |
| A_55_P2043682 | BC021811     | Ubac1         | 98766     | -1,321596728 | 12,03082796 | 0,000871858 |
| A_51_P260169  | NM_010360    | Gstm5         | 14866     | -1,346461593 | 9,685043011 | 0,020471461 |
| A_55_P2085546 | NM_021422    | Dnaja4        | 58233     | -1,354754623 | 11,45760215 | 0,000150583 |
| A_55_P2010292 | NM_009247    | Serpina1e     | 20704     | -1,363968706 | 9,747849462 | 0,002537527 |
| A_55_P2065567 | NM_026527    | Chac2         | 68044     | -1,39454623  | 8,771150538 | 5,37E-05    |
| A_55_P2094731 | NM_011439    | Sox13         | 20668     | -1,414455903 | 14,94215054 | 0,043359544 |
| A_55_P2036813 | NM_030082    | Hist3h2ba     | 78303     | -1,434877667 | 8,452795699 | 3,90E-05    |
| A_51_P120066  | NR_033222    | 9330151L19Rik | 414085    | -1,435753912 | 7,497677419 | 1,04E-13    |
| A_51_P501312  | NM_025294    | Natd1         | 24083     | -1,440820057 | 7,768698925 | 5,07E-33    |
| A_52_P484838  | NM_011266    | Rfxank        | 19727     | -1,443197013 | 8,339860215 | 1,43E-17    |
| A_55_P1979147 | NM_001159904 | Klrbc1c       | 17059     | -1,45173542  | 7,383645161 | 3,84E-08    |
| A_55_P1959985 | NM_020559    | Alas1         | 11655     | -1,457398293 | 10,5196129  | 5,59E-07    |
| A_51_P198675  | NM_138951    | Ttc36         | 192653    | -1,523484353 | 7,223344086 | 2,67E-14    |
| A_52_P450934  | NM_198414    | Paqr9         | 75552     | -1,555623755 | 10,5726129  | 0,001031129 |
| A_55_P2156288 | XM_001479076 | Gm3932        | 100042616 | -1,567237553 | 6,53316129  | 6,80E-07    |
| A_55_P2096340 | NM_029965    | Rnf170        | 77733     | -1,570621622 | 11,43025806 | 0,002029265 |
| A_55_P2105858 | NM_030693    | Atf5          | 107503    | -1,58713229  | 10,71622581 | 0,000171068 |
| A_55_P2396446 | AI593498     | Dusp8         | 18218     | -1,595353485 | 9,809       | 0,000841954 |
| A_55_P2170509 | NM_026417    | Yipf4         | 67864     | -1,671       | 10,1913871  | 0,000572445 |
| A_52_P104824  | NM_019670    | Diap3         | 56419     | -1,726324324 | 10,65836559 | 0,001125687 |
| A_55_P1988975 | BC028433     | Ms4a4b        | 60361     | -1,766899716 | 8,171290323 | 0,001112405 |
| A_55_P1960231 | NM_019913    | Txn2          | 56551     | -1,819573969 | 11,38143011 | 8,72E-07    |
| A_55_P2026639 | NM_001100614 | Gm11564       | 670496    | -1,952242532 | 7,642129032 | 2,90E-15    |
| A_55_P2051455 | NM_178882    | D2hgdh        | 98314     | -2,082539118 | 9,752978495 | 2,39E-08    |
| A_55_P2331804 | AK139027     | AU015791      | 104932    | -2,116881935 | 7,256967742 | 1,85E-16    |
| A_55_P2410875 | AK034163     | C030037D09Rik | 193280    | -2,845318634 | 8,738193548 | 2,07E-12    |
