# Supplementary material for: Of mice and men: the host response to influenza virus infection
Source: PubMed Central journal article supplement (PMC6132725; doi:10.1007/s00335-018-9750-y), 2018-06-15
Supplement: 335_2018_9750_MOESM12_ESM.pdf [file 335_2018_9750_MOESM12_ESM.pdf]

VENN gene lists resistant versus control for CC strains

\$CC\_resis\_ctr

|       |                 |                  |                  |                 |                 |                 |                 |
|-------|-----------------|------------------|------------------|-----------------|-----------------|-----------------|-----------------|
| [1]   | "1110038F14RIK" | "1110046J04RIK"  | "1110059E24RIK"  | "1500011B03RIK" | "1700037H04RIK" | "1810058I24RIK" | "2010002M12RIK" |
| [8]   | "2610002J02RIK" | "27000046G09RIK" | "27000089E24RIK" | "4833420G17RIK" | "4930449E01RIK" | "5033406009RIK" | "5330406M23RIK" |
| [15]  | "6030458C11RIK" | "6430548M08RIK"  | "9030619P08RIK"  | "9330151L19RIK" | "A130040M12RIK" | "A530040E14RIK" | "A530064D06RIK" |
| [22]  | "A930005H10RIK" | "ABC84"          | "ABCC3"          | "ACKR1"         | "ACTB"          | "ACTG1"         | "ADA"           |
| [29]  | "ADAM8"         | "ADAMTS14"       | "ADD2"           | "AGO2"          | "AI449595"      | "AI662270"      | "AKAP7"         |
| [36]  | "ALAS1"         | "ALDOA"          | "ALKBH5"         | "AMICA1"        | "ANXA1"         | "ANXA2"         | "APLF"          |
| [43]  | "APOL7B"        | "ARRDC3"         | "ASNS"           | "ASNSD1"        | "ATF5"          | "ATG12"         | "ATXN7L1"       |
| [50]  | "A0115791"      | "AW011738"       | "AW112010"       | "BB163080"      | "BCL2A1D"       | "BIRC2"         | "BLNK"          |
| [57]  | "BRCC3"         | "BST1"           | "BTG3"           | "C030037D09RIK" | "C130026I21RIK" | "C130074G19RIK" | "C3"            |
| [64]  | "C5AR2"         | "CACNA1I"        | "CALD1"          | "CALM3"         | "CAMK4"         | "CARHSP1"       | "CASP4"         |
| [71]  | "CCDC82"        | "CCL5"           | "CCNI"           | "CCR6"          | "CD226"         | "CD300LF"       | "CD33"          |
| [78]  | "CD37"          | "CD47"           | "CD55"           | "CD93"          | "CEBPB"         | "CEBPD"         | "CENPK"         |
| [85]  | "CEP89"         | "CHAC2"          | "CHCHD10"        | "CHIL1"         | "CHST3"         | "CHSY1"         | "CIB3"          |
| [92]  | "CIR1"          | "CITED4"         | "CLDN13"         | "CLEC4A3"       | "CLEC7A"        | "CLK3"          | "CLN8"          |
| [99]  | "CMA1"          | "CMTR1"          | "CNN2"           | "CNNM2"         | "COMT"          | "CRISPLD2"      | "CSPRS"         |
| [106] | "CTDSP2"        | "CXCR2"          | "D130062J21RIK"  | "D17WSU92E"     | "D2HGDH"        | "D5ERTD579E"    | "D630024D03RIK" |
| [113] | "D9WSU90E"      | "DAPK2"          | "DAPL1"          | "DFNA5"         | "DIAP3"         | "DIRAS2"        | "DNAJA4"        |
| [120] | "DNAJC9"        | "DNMT3B"         | "DNMTIP1"        | "DTX1"          | "DUSP1"         | "DUSP8"         | "DYNLT1C"       |
| [127] | "DYRK3"         | "E130309D14RIK"  | "E2F2"           | "EIF5"          | "ENDOD1"        | "F5"            | "F830002L21RIK" |
| [134] | "FADS3"         | "FAM126A"        | "FAM32A"         | "FAM65B"        | "FAM83F"        | "FASL"          | "FCER2A"        |
| [141] | "FCGR1"         | "FCGR4"          | "FGD2"           | "FGFR1OP2"      | "FGL2"          | "FHDC1"         | "FLNA"          |
| [148] | "FOSL2"         | "FOXP1"          | "FPR1"           | "FPR2"          | "FUND2"         | "FZR1"          | "GAA"           |
| [155] | "GBP11"         | "GBP7"           | "GBP9"           | "GCLC"          | "GFI1B"         | "GID4"          | "GIMAP3"        |
| [162] | "GIMAP6"        | "GM10136"        | "GM10144"        | "GM10639"       | "GM10845"       | "GM11564"       | "GM12250"       |
| [169] | "GM14446"       | "GM14548"        | "GM14635"        | "GM14989"       | "GM1966"        | "GM3181"        | "GM3430"        |
| [176] | "GM3697"        | "GM3798"         | "GM3932"         | "GM4015"        | "GM4320"        | "GM4499"        | "GM4951"        |
| [183] | "GM5150"        | "GM5299"         | "GM5483"         | "GM6453"        | "GM6578"        | "GM8884"        | "GM8995"        |
| [190] | "GM9706"        | "GM9790"         | "GRAP"           | "GSTP2"         | "GVIN1"         | "GZMA"          | "H2-AB1"        |
| [197] | "H2-D1"         | "H2-DMB1"        | "H2-OA"          | "H2-OB"         | "H2-Q10"        | "H2-Q2"         | "H2-Q7"         |
| [204] | "H2-T10"        | "H2-T23"         | "H2-T9"          | "HCAR2"         | "HDC"           | "HINT1"         | "HIST2H3C1"     |
| [211] | "HMG2-PS1"      | "HN1"            | "I830012016RIK"  | "ICAM4"         | "IFI202B"       | "IFI204"        | "IFI27L2A"      |
| [218] | "IFITM2"        | "IFITM6"         | "IFNAR2"         | "IGH-VJ558"     | "IGHV14-2"      | "IGSF6"         | "IGTP"          |
| [225] | "IL18BP"        | "IL1B"           | "IL1F9"          | "IL1R2"         | "IL4I1"         | "INF2"          | "IRG1"          |
| [232] | "IRGM1"         | "IRGM2"          | "ITPR2"          | "JOSD2"         | "JUND"          | "KEL"           | "KIF21B"        |
| [239] | "KLHL25"        | "KLRA15"         | "KLRA22"         | "KLRA23"        | "KLRA4"         | "KLRA5"         | "KLRA7"         |
| [246] | "KLRA8"         | "KLRA9"          | "KLRB1A"         | "KLRB1C"        | "KLRC1"         | "KLRD1"         | "LGALS1"        |
| [253] | "LIMD2"         | "LOC547349"      | "LRG1"           | "LRP1"          | "LRR25"         | "LTB"           | "LY6D"          |
| [260] | "LY6F"          | "LY6I"           | "MAD2L1BP"       | "MAN2C1"        | "MAP2K3"        | "MAP4K1"        | "MAPRE2"        |
| [267] | "MARCKS"        | "MAU2"           | "MEFV"           | "METAP2"        | "MGST1"         | "MIF4GD"        | "MMD"           |
| [274] | "MMP8"          | "MNDA"           | "MPEG1"          | "MRAS"          | "MRGPRA2A"      | "MRGPRA2B"      | "MRGPRA5"       |
| [281] | "MRGPRA6"       | "MRPL32"         | "MRPL39"         | "MS4A4B"        | "MS4A4C"        | "MS4A6D"        | "MSRB1"         |
| [288] | "MTCP1"         | "MZT1"           | "NACC2"          | "NATD1"         | "NCF2"          | "NCF4"          | "NCOR2"         |
| [295] | "NFATC1"        | "NFE2"           | "NKG7"           | "NLRC5"         | "NOM1"          | "NOSIP"         | "NUPR1"         |
| [302] | "OAS1A"         | "OAS1C"          | "OAS1E"          | "OAS1F"         | "OASL1"         | "OASL2"         | "OCEL1"         |
| [309] | "OGDH"          | "OGFOD1"         | "OGFR"           | "OGFRL1"        | "P2RY1"         | "P2RY12"        | "P2RY13"        |
| [316] | "PAQR4"         | "PAQR9"          | "PCP4L1"         | "PDE6H"         | "PDLIM4"        | "PEG13"         | "PFDN2"         |
| [323] | "PHF11A"        | "PHF11B"         | "PHF11D"         | "PIGQ"          | "PILRA"         | "PIRB"          | "PKM"           |
| [330] | "PLA2G2D"       | "PLA2G7"         | "PLEKHG2"        | "POFUT1"        | "POU2AF1"       | "POU2F2"        | "PPBP"          |
| [337] | "PPP1R15A"      | "PPP1R3B"        | "PPP1R3D"        | "PRAM1"         | "PRL2C1"        | "PROKR1"        | "PRR5L"         |
| [344] | "PSENN"         | "PTP4A3"         | "PTPRCAP"        | "PTRF"          | "PYGL"          | "RAB3IL1"       | "RALGPS1"       |
| [351] | "RANGAP1"       | "RFXANK"         | "RGCC"           | "RGS12"         | "RGS18"         | "RHD"           | "RNASEH2C"      |
| [358] | "RNF114"        | "RNF115"         | "RNF149"         | "RNU1B6"        | "RP9"           | "RPL14"         | "RPS3A1"        |
| [365] | "RPS6KB1"       | "RPUSD4"         | "SAA3"           | "SAMM50"        | "SCNN1A"        | "SEPW1"         | "SERPINA3G"     |
| [372] | "SERPINB6A"     | "SERPINB6B"      | "SERPINB6C"      | "SETD4"         | "SFXN1"         | "SH3BGR2"       | "SIGLECE"       |
| [379] | "SIRPB1B"       | "SKA1"           | "SKINT3"         | "SLAMP1"        | "SLC15A3"       | "SLC16A3"       | "SLC24A3"       |
| [386] | "SLC35B1"       | "SLC43A1"        | "SLC6A13"        | "SLC7A5"        | "SLC8A1"        | "SLCO1C1"       | "SLFN1"         |
| [393] | "SLFN4"         | "SLFN8"          | "SMC6"           | "SNX8"          | "SOCS3"         | "SOD1"          | "SORD"          |
| [400] | "SPATA2"        | "SPHK1"          | "SPPL2B"         | "SSBP2"         | "ST3GAL6"       | "ST6GALNAC2"    | "ST7"           |
| [407] | "STK11IP"       | "STK3"           | "SULT4A1"        | "SYNGR1"        | "SYTL3"         | "TAB3"          | "TANGO6"        |
| [414] | "TBX21"         | "TG"             | "TGM2"           | "TGTP2"         | "TLN1"          | "TLR13"         | "TLR2"          |
| [421] | "TLR6"          | "TMCC2"          | "TMEM29"         | "TMEM37"        | "TMEM86B"       | "TNFRSF13B"     | "TNFRSF1A"      |

|       |           |            |           |           |          |              |          |
|-------|-----------|------------|-----------|-----------|----------|--------------|----------|
| [428] | "TNFSF14" | "TOR1AIP2" | "TOR3A"   | "TPCN1"   | "TREM1"  | "TRF"        | "TRIB3"  |
| [435] | "TRIM12C" | "TRIM30A"  | "TRIM30B" | "TRIM30D" | "TRIOBP" | "TSPAN12"    | "TSPAN8" |
| [442] | "TTC36"   | "TTC39A"   | "TTPAL"   | "TUBA8"   | "TUBB2A" | "TUBB2A-PS2" | "TUBB2B" |
| [449] | "TUSC1"   | "TXN2"     | "TXNRD2"  | "UBAP1"   | "UBE20"  | "UGT1A6B"    | "UROS"   |
| [456] | "VILL"    | "VIPR1"    | "VMP1"    | "VWF"     | "WDFY1"  | "WDFY4"      | "WDR48"  |
| [463] | "WFDC17"  | "WHSC1"    | "XKRX"    | "XLR3B"   | "XLR4A"  | "XLR4B"      | "YAP1"   |
| [470] | "YIPF4"   | "ZIC1"     | "ZKSCAN1" |           |          |              |          |

\$Tang

|       |               |             |                |               |             |              |             |
|-------|---------------|-------------|----------------|---------------|-------------|--------------|-------------|
| [1]   | "A1BG"        | "A2M-AS1"   | "ABCA1"        | "ABHD14B"     | "ABLM1"     | "ACADSB"     | "ACAT1"     |
| [8]   | "ACCS"        | "ACKR3"     | "ACOT13"       | "ACOXL"       | "ACRBP"     | "ADAMTS10"   | "ADARB1"    |
| [15]  | "ADCY4"       | "ADRB2"     | "AES"          | "AKAP11"      | "AKIRIN2"   | "ALG13"      | "AMIGO1"    |
| [22]  | "AMPD2"       | "ANK3"      | "ANKRD22"      | "ANKRD36"     | "ANKRD46"   | "ANKRD9"     | "ANKS6"     |
| [29]  | "ANXA8L1"     | "AP5B1"     | "APBA2"        | "APOBEC3B"    | "APOBEC3H"  | "AQP1"       | "AQP10"     |
| [36]  | "ARG1"        | "ARHGAP5"   | "ARHGEF40"     | "ARL17A"      | "ARL4A"     | "ARL4C"      | "ARNTL"     |
| [43]  | "ARPC3"       | "ARPC5"     | "ASGR2"        | "ASPH"        | "ASPM"      | "ATF1"       | "ATP5I"     |
| [50]  | "ATP5J"       | "ATP6"      | "ATP6V0E2-AS1" | "AUTS2"       | "B4GALT5"   | "BAALC"      | "BACH2"     |
| [57]  | "BAHD1"       | "BATF2"     | "BCL11A"       | "BCL11B"      | "BCL2A1"    | "BIRC3"      | "BIRC5"     |
| [64]  | "BLK"         | "BRD1"      | "BTG1"         | "BTN3A1"      | "BUB1"      | "BZRAP1-AS1" | "C10orf105" |
| [71]  | "C12orf57"    | "C16orf74"  | "C1orf52"      | "C20orf141"   | "C2orf40"   | "C2orf88"    | "C4orf33"   |
| [78]  | "C5orf45"     | "C6orf48"   | "CA2"          | "CACNA1E"     | "CACNG6"    | "CAMK1D"     | "CAP1"      |
| [85]  | "CARD11"      | "CARD16"    | "CARD17"       | "CARD6"       | "CASC15"    | "CASC5"      | "CBLB"      |
| [92]  | "CBX7"        | "CCDC102A"  | "CCDC144A"     | "CCDC147-AS1" | "CCNA2"     | "CCNB1"      | "CCR3"      |
| [99]  | "CD164"       | "CD177"     | "CD2"          | "CD22"        | "CD247"     | "CD28"       | "CD300E"    |
| [106] | "CD3E"        | "CD40LG"    | "CD5"          | "CD6"         | "CD63"      | "CD7"        | "CD81"      |
| [113] | "CD8A"        | "CD8B"      | "CDC20"        | "CDC42SE1"    | "CDC45"     | "CDCA2"      | "CDCA3"     |
| [120] | "CDCA5"       | "CDK1"      | "CDK11A"       | "CDK11B"      | "CDKN2C"    | "CDKN3"      | "CDT1"      |
| [127] | "CDV3"        | "CENPF"     | "CENPM"        | "CENPN"       | "CENPU"     | "CENPW"      | "CEP19"     |
| [134] | "CES1"        | "CFAP97"    | "CHEK1"        | "CHIT1"       | "CHPT1"     | "CHRM3-AS2"  | "CISD2"     |
| [141] | "CIT"         | "CKAP4"     | "CKLF"         | "CKS1B"       | "CKS2"      | "CLEC10A"    | "CLEC11A"   |
| [148] | "CLEC12A"     | "CLEC1B"    | "CLUHP3"       | "CMTM5"       | "CNIH4"     | "CNR2"       | "CNTNAP3"   |
| [155] | "COQ10A"      | "COX17"     | "COX7B"        | "CR1"         | "CREG1"     | "CRHR1-IT1"  | "CRIP2"     |
| [162] | "CROCC"       | "CRTCL1"    | "CSGALNACT2"   | "CSTA"        | "CTNNAL1"   | "CTSF"       | "CTSL"      |
| [169] | "CTTN"        | "CYB561A3"  | "CYSTM1"       | "CYTH3"       | "DBI"       | "DCAF16"     | "DDAH2"     |
| [176] | "DEFA8P"      | "DENND2D"   | "DHFR"         | "DIAPH3"      | "DISC1"     | "DLGAP5"     | "DNAJA1P5"  |
| [183] | "DNAJA3"      | "DNAJC30"   | "DNAJC5"       | "DOCK10"      | "DPP4"      | "DPRXP4"     | "DRC1"      |
| [190] | "DTL"         | "DUSP13"    | "DUT"          | "DYRK2"       | "E2F1"      | "E2F7"       | "ECRP"      |
| [197] | "EEF1A1"      | "EEF2K"     | "EIF1AX"       | "EIF3F"       | "EIF4A2"    | "EIF4G3"     | "ENHO"      |
| [204] | "ENO2"        | "ENY2"      | "EPHX2"        | "ERN1"        | "ESPL1"     | "ESRG"       | "EVI2A"     |
| [211] | "EVL"         | "EZH2"      | "FABP5"        | "FAM102A"     | "FAM117B"   | "FAM129C"    | "FAM134B"   |
| [218] | "FAM155A-IT1" | "FAM159A"   | "FAM177B"      | "FAM20A"      | "FAM26F"    | "FAM27C"     | "FANCE"     |
| [225] | "FANCI"       | "FBL"       | "FBLN5"        | "FBXL16"      | "FCAR"      | "FCER1A"     | "FCER2"     |
| [232] | "FCGBP"       | "FCGR1A"    | "FCN1"         | "FCRL1"       | "FCRL2"     | "FCRL3"      | "FCRL6"     |
| [239] | "FFAR3"       | "FGD4"      | "FLT3LG"       | "FOXJ3"       | "FOXML1"    | "FRMD3"      | "FSD1"      |
| [246] | "FSTL3"       | "FTL"       | "FXYS5"        | "G0S2"        | "GADD45G"   | "GALM"       | "GALNT14"   |
| [253] | "GATA3"       | "GBP3"      | "GCSAM"        | "GDF15"       | "GGH"       | "GINS1"      | "GINS2"     |
| [260] | "GLCC11"      | "GLIPIR2"   | "GLS"          | "GLTSCR2"     | "GMFG"      | "GMNN"       | "GNB2L1"    |
| [267] | "GNG10"       | "GNG11"     | "GOLGA8A"      | "GP1BB"       | "GPA33"     | "GPD2"       | "GPER1"     |
| [274] | "GPR141"      | "GPR174"    | "GPR18"        | "GPR183"      | "GPR68"     | "GPR84"      | "GPRASP1"   |
| [281] | "GRB10"       | "GRN"       | "GRPEL2"       | "GSN"         | "GSTM3"     | "GTF2H5"     | "GTSE1"     |
| [288] | "GVINP1"      | "GYG1"      | "GZMK"         | "GZMM"        | "H1F0"      | "HABP4"      | "HAPLN3"    |
| [295] | "HBM"         | "HCG18"     | "HEBP2"        | "HELZ2"       | "HES6"      | "HIP1R"      | "HIST1H1B"  |
| [302] | "HIST1H2AB"   | "HIST1H2AC" | "HIST1H2AD"    | "HIST1H2AE"   | "HIST1H2AG" | "HIST1H2AH"  | "HIST1H2AI" |
| [309] | "HIST1H2AJ"   | "HIST1H2AK" | "HIST1H2AL"    | "HIST1H2AM"   | "HIST1H2BB" | "HIST1H2BC"  | "HIST1H2BD" |
| [316] | "HIST1H2BE"   | "HIST1H2BF" | "HIST1H2BG"    | "HIST1H2BH"   | "HIST1H2BI" | "HIST1H2BJ"  | "HIST1H2BK" |
| [323] | "HIST1H2BL"   | "HIST1H2BM" | "HIST1H2BO"    | "HIST1H3B"    | "HIST1H3D"  | "HIST1H3F"   | "HIST1H3H"  |
| [330] | "HIST1H3J"    | "HIST1H4D"  | "HIST1H4F"     | "HIST1H4K"    | "HIST1H4L"  | "HIST2H2AA4" | "HIST2H2AB" |
| [337] | "HIST2H3A"    | "HJURB"     | "HK3"          | "HLA-DOA"     | "HLA-DOB"   | "HLA-DPA1"   | "HLA-DPB1"  |
| [344] | "HLA-DPB2"    | "HLA-DQA2"  | "HLA-DQB1"     | "HLA-DQB2"    | "HLA-DRA"   | "HLA-DRB3"   | "HMGB1"     |
| [351] | "HMGB2"       | "HMGB3P1"   | "HMMR"         | "HNRNPA1"     | "HNRNPH1"   | "HOXB2"      | "HP1BP3"    |
| [358] | "HPR"         | "HRASLS2"   | "HS3ST1"       | "HSP90AA1"    | "HSPA8"     | "ICOS"       | "IFFO2"     |
| [365] | "IFI27L1"     | "IFI27L2"   | "IFITM4P"      | "IFT20"       | "IGFBP7"    | "IGJ"        | "IGLL1"     |
| [372] | "IGLL5"       | "IKZF2"     | "IL10RB-AS1"   | "IL11RA"      | "IL18R1"    | "IL18RAP"    | "IL1RAP"    |

|       |             |              |            |            |            |               |             |
|-------|-------------|--------------|------------|------------|------------|---------------|-------------|
| [379] | "IL23A"     | "IL27"       | "IL2RB"    | "IL32"     | "IL7R"     | "ING5"        | "INHBA"     |
| [386] | "INPP4B"    | "INPP5E"     | "IRAK3"    | "ISCA1"    | "ISY1"     | "ITGA2B"      | "ITGA7"     |
| [393] | "ITIH4"     | "ITK"        | "JDP2"     | "JPH4"     | "KCNGL"    | "KDF1"        | "KIAA0101"  |
| [400] | "KIAA0226L" | "KIAA0319L"  | "KIAA0355" | "KIAA1147" | "KIF11"    | "KIF1B"       | "KIF2C"     |
| [407] | "KLF12"     | "KLHDC7B"    | "KLHDC8B"  | "KLHL3"    | "KLR3C"    | "KLR4C"       | "KRTAP10-6" |
| [414] | "LAT"       | "LBH"        | "LCK"      | "LCN2"     | "LDLRAP1"  | "LEF1-AS1"    | "LEPROTL1"  |
| [421] | "LILRA3"    | "LILRA5"     | "LILRA6"   | "LILRB3"   | "LIN7A"    | "LIPN"        | "LLGL2"     |
| [428] | "LMF1"      | "LOXL3"      | "LPIN1"    | "LRFN3"    | "LRIG1"    | "LRR47"       | "LRRN3"     |
| [435] | "LSM3"      | "LTB4R"      | "LTBP3"    | "LTF"      | "LY9"      | "LY96"        | "MAL"       |
| [442] | "MAMSTR"    | "MAN1C1"     | "MAOA"     | "MAP1LC3B" | "MAPK14"   | "MATK"        | "MB21D1"    |
| [449] | "MCF2L-AS1" | "MCM2"       | "MCM4"     | "MEAF6"    | "MEGF6"    | "MEX3C"       | "MEX3D"     |
| [456] | "MGAM"      | "MGC16025"   | "MGLL"     | "MLLR1"    | "MIR146A"  | "MIR4435-1HG" | "MKI67"     |
| [463] | "MLLT6"     | "MME"        | "MOAP1"    | "MPO"      | "MRC2"     | "MRPL22"      | "MRPL27"    |
| [470] | "MRPL51"    | "MRPS18C"    | "MSN"      | "MSX2P1"   | "MT1B"     | "MT1E"        | "MT1HL1"    |
| [477] | "MT1L"      | "MT1M"       | "MTA1"     | "MXD4"     | "MXI1"     | "MXRA7"       | "MYBL1"     |
| [484] | "MYBL2"     | "MYBPC3"     | "MYC"      | "MYCL"     | "MYL6"     | "MYL6B"       | "MYL9"      |
| [491] | "MZB1"      | "NAB2"       | "NAIP"     | "NAP1L1"   | "NCR3"     | "ND6"         | "NDRG2"     |
| [498] | "NDST2"     | "NDUFA1"     | "NDUFA4"   | "NDUFA6"   | "NDUFB3"   | "NELL2"       | "NEXN"      |
| [505] | "NIPAL"     | "NKTR"       | "NKX3-1"   | "NLRC3"    | "NLRC4"    | "NMUR1"       | "NOG"       |
| [512] | "NOP10"     | "NRIR"       | "NSG1"     | "NT5C3A"   | "NT5E"     | "NT5M"        | "NTNG2"     |
| [519] | "NTSR1"     | "NUSAP1"     | "OBF1C1"   | "ODF3B"    | "OIP5"     | "OPLAH"       | "OR52K2"    |
| [526] | "OSCAR"     | "OXNAD1"     | "P2RX5"    | "P2RY10"   | "PABPC4"   | "PASK"        | "PCED1B"    |
| [533] | "PCMT1"     | "PCNA"       | "PCSK1N"   | "PDE4DIP"  | "PDP1"     | "PEBP1"       | "PHC3"      |
| [540] | "PHF19"     | "PID1"       | "PIK3AP1"  | "PIK3C2B"  | "PIN4"     | "PIWIL4"      | "PJA1"      |
| [547] | "PKIA"      | "PKMYT1"     | "PLBD1"    | "PLCG1"    | "PLEKHA1"  | "PLEKHB1"     | "PLEKHG4"   |
| [554] | "PLVAP"     | "PLXDC1"     | "PLXNA1"   | "PMEPA1"   | "PNMA1"    | "PNRC1"       | "POLG2"     |
| [561] | "POLRMT"    | "PP7080"     | "PPARD"    | "PPIB"     | "PQLC1"    | "PRC1"        | "PRDX4"     |
| [568] | "PREPL"     | "PRKAG2-AS1" | "PRKAR1B"  | "PRKAR2B"  | "PRKCA"    | "PRKCH"       | "PRKCQ-AS1" |
| [575] | "PRNP"      | "PRRG4"      | "PRUNE2"   | "PSIP1"    | "PSMA2"    | "PSMA3"       | "PSMA4"     |
| [582] | "PSMA6"     | "PSMC2"      | "PSMF1"    | "PTCRA"    | "PTGDR"    | "PTGDR2"      | "PTPRK"     |
| [589] | "PTTG1"     | "PTTG2"      | "PTX3"     | "PURA"     | "PYCR1"    | "RAB11FIP3"   | "RAB13"     |
| [596] | "RABL2A"    | "RAD21"      | "RAD51"    | "RAD54L"   | "RAI1"     | "RALGAPA1"    | "RARA-AS1"  |
| [603] | "RASA4"     | "RASGRP1"    | "RBM20"    | "RBX1"     | "RCAN3"    | "REC8"        | "RECQL4"    |
| [610] | "RETN"      | "RFTN1"      | "RGL4"     | "RHOH"     | "RMI2"     | "RNA5-8S5"    | "RNASE1"    |
| [617] | "RNF208"    | "RNF32"      | "RNF44"    | "RORC"     | "RPA3"     | "RPL10A"      | "RPL10L"    |
| [624] | "RPL13"     | "RPL15"      | "RPL18"    | "RPL18A"   | "RPL19P12" | "RPL22"       | "RPL22L1"   |
| [631] | "RPL23A"    | "RPL23AP7"   | "RPL26L1"  | "RPL29"    | "RPL29P2"  | "RPL3"        | "RPL4"      |
| [638] | "RPL5"      | "RPL7A"      | "RPLP2"    | "RPS13"    | "RPS14"    | "RPS16"       | "RPS18"     |
| [645] | "RPS2"      | "RPS23"      | "RPS27A"   | "RPS27L"   | "RPS28"    | "RPS2P32"     | "RPS6KA5"   |
| [652] | "RPSAP9"    | "RRAGD"      | "RRAS2"    | "RRBP1"    | "RSAD1"    | "RSPH9"       | "RTN1"      |
| [659] | "RUNX3"     | "S100A12"    | "S100P"    | "S100PBP"  | "SACS"     | "SAMS1"       | "SAP30"     |
| [666] | "SARDH"     | "SARM1"      | "SBK1"     | "SCAI"     | "SCARF1"   | "SCARNA17"    | "SCML4"     |
| [673] | "SDCL1"     | "SEC11C"     | "SELL"     | "SELM"     | "SEMA4C"   | "Sep 01"      | "SERTAD2"   |
| [680] | "SF3B6"     | "SFI1"       | "SGK223"   | "SH2D1B"   | "SH2D3A"   | "SH3YL1"      | "SHCBP1"    |
| [687] | "SIDT1"     | "SIGLEC17P"  | "SIGLEC5"  | "SIPAL1L2" | "SIT1"     | "SKAP1"       | "SLC1A3"    |
| [694] | "SLC22A15"  | "SLC22A4"    | "SLC25A6"  | "SLC26A11" | "SLC26A8"  | "SLC38A1"     | "SLC45A3"   |
| [701] | "SLC6A19"   | "SLED1"      | "SLIRP"    | "SMA4"     | "SMARCD3"  | "SMC1A"       | "SMPD3"     |
| [708] | "SNAR-B2"   | "SNAR-D"     | "SNAR-H"   | "SNHG6"    | "SNORA54"  | "SNORD105B"   | "SNORD46"   |
| [715] | "SNORD68"   | "SNRPD1"     | "SNRPG"    | "SNX22"    | "SPAG5"    | "SPC24"       | "SPC25"     |
| [722] | "SPCS3"     | "SPOCK2"     | "SRGAP2"   | "SRGAP2B"  | "SRGN"     | "SRP19"       | "SRSF10"    |
| [729] | "SRSF8"     | "ST6GAL1"    | "STAB1"    | "STAC3"    | "STAT4"    | "STIL"        | "STK26"     |
| [736] | "STMN1"     | "STMN3"      | "STOM"     | "STRBP"    | "SUB1"     | "SUN1"        | "SUSD6"     |
| [743] | "TAGAP"     | "TANK"       | "TC2N"     | "TCF7"     | "TCL1A"    | "TCIN1"       | "TFDP1"     |
| [750] | "TIGD3"     | "TIMM8B"     | "TK1"      | "TLE2"     | "TLR5"     | "TMCC1"       | "TMEM106B"  |
| [757] | "TMEM109"   | "TMEM119"    | "TMEM204"  | "TMEM209"  | "TMEM243"  | "TMEM25"      | "TMEM263"   |
| [764] | "TNFRSF17"  | "TNFRSF25"   | "TOP1MT"   | "TP53I3"   | "TPM4"     | "TPST1"       | "TPX2"      |
| [771] | "TRABD2A"   | "TRAF1"      | "TRAF5"    | "TRAK1"    | "TRG-AS1"  | "TRGV7"       | "TRIM34"    |
| [778] | "TRIM4"     | "TRIM54"     | "TROAP"    | "TSHZ1"    | "TSPAN3"   | "TSPYL4"      | "TTC3"      |
| [785] | "TUBE1"     | "TXN"        | "TXNDC5"   | "TYMS"     | "UBASH3A"  | "UBE2C"       | "UBE2L3"    |
| [792] | "UBE2Q2"    | "UBE2T"      | "UBE2V1"   | "UCHL1"    | "UNCX"     | "UPP1"        | "UQCRB"     |
| [799] | "UQCRQ"     | "USP41"      | "VEGFA"    | "VEGFB"    | "VIM"      | "VNN1"        | "VPS13C"    |
| [806] | "VPS37C"    | "VPS51"      | "WDR86"    | "WFDC3"    | "ZAP70"    | "ZBED6CL"     | "ZBTB11"    |
| [813] | "ZBTB32"    | "ZBTB4"      | "ZBTB40"   | "ZCCHC14"  | "ZDHHC11"  | "ZFP62"       | "ZFYVE28"   |

|       |          |          |           |          |           |          |          |
|-------|----------|----------|-----------|----------|-----------|----------|----------|
| [820] | "ZMAT1"  | "ZNF12"  | "ZNF204P" | "ZNF205" | "ZNF286B" | "ZNF529" | "ZNF550" |
| [827] | "ZNF684" | "ZNF831" | "ZNF837"  | "ZNF90"  | "ZSCAN18" | "ZSWIM7" | "ZWINT"  |
| [834] | "ZXDB"   |          |           |          |           |          |          |

\$Woods

|       |                    |  |  |  |                         |  |  |
|-------|--------------------|--|--|--|-------------------------|--|--|
| [1]   | "ABAT"             |  |  |  | "ABCA2"                 |  |  |
| [3]   | "ABCC6"            |  |  |  | "ACOT9"                 |  |  |
| [5]   | "ADAMTS5"          |  |  |  | "AFF1"                  |  |  |
| [7]   | "ANPEP"            |  |  |  | "AP1M2"                 |  |  |
| [9]   | "APOBEC1"          |  |  |  | "APOBEC3G"              |  |  |
| [11]  | "APOL1"            |  |  |  | "ARHGAP32"              |  |  |
| [13]  | "ARL3"             |  |  |  | "ART3"                  |  |  |
| [15]  | "ATF3"             |  |  |  | "ATP2B2"                |  |  |
| [17]  | "ATP6V1A"          |  |  |  | "BAGE"                  |  |  |
| [19]  | "BATF3"            |  |  |  | "BPY2"                  |  |  |
| [21]  | "BRCA2"            |  |  |  | "C10orf84"              |  |  |
| [23]  | "C11orf75"         |  |  |  | "C18orf25"              |  |  |
| [25]  | "C19orf66"         |  |  |  | "C1GALT1"               |  |  |
| [27]  | "C1orf106"         |  |  |  | "C22orf28"              |  |  |
| [29]  | "C9orf91"          |  |  |  | "CA4"                   |  |  |
| [31]  | "CACNA1A"          |  |  |  | "CASP5"                 |  |  |
| [33]  | "CASS4"            |  |  |  | "CBR1"                  |  |  |
| [35]  | "CCL2"             |  |  |  | "CCL8"                  |  |  |
| [37]  | "CCNA1"            |  |  |  | "CCR1"                  |  |  |
| [39]  | "CD2AP"            |  |  |  | "CDKN1A"                |  |  |
| [41]  | "CDKN1C"           |  |  |  | "CENPI"                 |  |  |
| [43]  | "CFTR"             |  |  |  | "CMKLR1"                |  |  |
| [45]  | "CNP"              |  |  |  | "COBLL1"                |  |  |
| [47]  | "CPB1"             |  |  |  | "CPEB3"                 |  |  |
| [49]  | "CRYAB"            |  |  |  | "CST4"                  |  |  |
| [51]  | "CT62"             |  |  |  | "CWH43"                 |  |  |
| [53]  | "CXCL6"            |  |  |  | "CXorf21"               |  |  |
| [55]  | "DAAM2"            |  |  |  | "DDO"                   |  |  |
| [57]  | "DNAJC15"          |  |  |  | "DPEP3"                 |  |  |
| [59]  | "DUSP3"            |  |  |  | "DUSP5"                 |  |  |
| [61]  | "DUX1"             |  |  |  | "EGR2"                  |  |  |
| [63]  | "ENPP2"            |  |  |  | "EPB41L3"               |  |  |
| [65]  | "EPB41L4A"         |  |  |  | "EPHA4"                 |  |  |
| [67]  | "EPHB2"            |  |  |  | "EPS8"                  |  |  |
| [69]  | "FAM70A"           |  |  |  | "FANCA"                 |  |  |
| [71]  | "FANCL"            |  |  |  | "FCGR1A /// FCGR1C"     |  |  |
| [73]  | "FCGR2B"           |  |  |  | "FFAR2"                 |  |  |
| [75]  | "FTSJ2"            |  |  |  | "FUT4"                  |  |  |
| [77]  | "FZD5"             |  |  |  | "GADD45B"               |  |  |
| [79]  | "GALNT3"           |  |  |  | "GK"                    |  |  |
| [81]  | "GOLGA6L4 /// PML" |  |  |  | "GRAMD1C"               |  |  |
| [83]  | "GSTA1"            |  |  |  | "GTPBP2"                |  |  |
| [85]  | "GUCA1A"           |  |  |  | "GUCY1B3"               |  |  |
| [87]  | "HBE1"             |  |  |  | "HESX1"                 |  |  |
| [89]  | "HEY1"             |  |  |  | "HFE"                   |  |  |
| [91]  | "HGF"              |  |  |  | "HPSE"                  |  |  |
| [93]  | "ICA1"             |  |  |  | "ID3"                   |  |  |
| [95]  | "IDO1"             |  |  |  | "IDS"                   |  |  |
| [97]  | "IGF2R"            |  |  |  | "IL10"                  |  |  |
| [99]  | "IL15"             |  |  |  | "IRS2"                  |  |  |
| [101] | "ITGB4"            |  |  |  | "JUP"                   |  |  |
| [103] | "KAZ"              |  |  |  | "KCND1"                 |  |  |
| [105] | "KCNK10"           |  |  |  | "KCTD14"                |  |  |
| [107] | "KIAA0226"         |  |  |  | "KIAA1324"              |  |  |
| [109] | "KIT"              |  |  |  | "KMO"                   |  |  |
| [111] | "KPTN"             |  |  |  | "KSR1"                  |  |  |
| [113] | "KYNU"             |  |  |  | "LCAT"                  |  |  |
| [115] | "LEP"              |  |  |  | "LOC100505584 /// MT1E" |  |  |

|       |                                                      |                     |
|-------|------------------------------------------------------|---------------------|
| [117] | "LOC51145"                                           | "LOC652346 /// PML" |
| [119] | "LPAR1"                                              | "LPAR6"             |
| [121] | "LPHN3"                                              | "LTK"               |
| [123] | "MAP7"                                               | "MAST3"             |
| [125] | "MDC1"                                               | "MDK"               |
| [127] | "MET"                                                | "METT10D"           |
| [129] | "METTL7A"                                            | "MGP"               |
| [131] | "MICB"                                               | "MMP9"              |
| [133] | "MMRN1"                                              | "MR1"               |
| [135] | "MSR1"                                               | "MT1F"              |
| [137] | "MT1G"                                               | "MT1H"              |
| [139] | "MT1P2"                                              | "MT1X"              |
| [141] | "MTHFD2"                                             | "MTHFR"             |
| [143] | "MTTP"                                               | "MYO7A"             |
| [145] | "MYOF"                                               | "MZFL"              |
| [147] | "NECAB2"                                             | "NEUROD2"           |
| [149] | "NF2"                                                | "NFATC4"            |
| [151] | "NR2F6"                                              | "NR4A2"             |
| [153] | "NSUN7"                                              | "NTRK3"             |
| [155] | "OMD"                                                | "OSBPL7"            |
| [157] | "P2RX7"                                              | "P2RY14"            |
| [159] | "P2RY6"                                              | "PADI4"             |
| [161] | "PARP11"                                             | "PBXIP1"            |
| [163] | "PDZD8"                                              | "PEX7"              |
| [165] | "PGAP1"                                              | "PLEKHG3"           |
| [167] | "PLOD2"                                              | "POLR3G"            |
| [169] | "PPY2"                                               | "PRB4"              |
| [171] | "PRKDC"                                              | "PSG2"              |
| [173] | "PSMB9"                                              | "PTP4A1"            |
| [175] | "PTPRO"                                              | "RAB27B"            |
| [177] | "RANBP1"                                             | "RBCK1"             |
| [179] | "RBM17"                                              | "RBMS2"             |
| [181] | "RCN3"                                               | "RFX2"              |
| [183] | "RGL1"                                               | "RHAG"              |
| [185] | "RHBDF1"                                             | "RIN2"              |
| [187] | "RPGRIPI1"                                           | "RRAS"              |
| [189] | "SCAND2"                                             | "SCN11A"            |
| [191] | "SDC2"                                               | "SDC3"              |
| [193] | "SEC24D"                                             | "SEC61A2"           |
| [195] | "SECTM1"                                             | "SEPP1"             |
| [197] | "SEPT4"                                              | "SLAMP7"            |
| [199] | "SLC12A8"                                            | "SLC25A24"          |
| [201] | "SLC27A3"                                            | "SLC38A3"           |
| [203] | "SLC5A7"                                             | "SLC6A2"            |
| [205] | "SLFN12"                                             | "SNRNP70"           |
| [207] | "SOBP"                                               | "SORT1"             |
| [209] | "SOX3"                                               | "SOX4"              |
| [211] | "SRBD1"                                              | "SYCP1"             |
| [213] | "SYN2"                                               | "TAP2"              |
| [215] | "TAZ"                                                | "TMEM62"            |
| [217] | "TMX1"                                               | "TNIP3"             |
| [219] | "TRIM21"                                             | "TSHR"              |
| [221] | "UBE4B"                                              | "VAMP4"             |
| [223] | "VRK2"                                               | "WSB2"              |
| [225] | "XAGE1A /// XAGE1B /// XAGE1C /// XAGE1D /// XAGE1E" | "ZNF248"            |

\$Zhai

|      |                |                |                |                |                |                |                |
|------|----------------|----------------|----------------|----------------|----------------|----------------|----------------|
| [1]  | "              | "ADAR"         | "ADIPOR1"      | "ALPL"         | "ASCC2"        | "BCL2L1"       | "BSG"          |
| [8]  | "CECR1"        | "CSDA"         | "CX3CR1"       | "DPYSL5"       | "ECGF1"        | "EEF1G"        | "EPB42"        |
| [15] | "FBXO7"        | "GBP4"         | "GBP5"         | "GIMAP4"       | "GPR175"       | "GSPT1"        | "HAGH"         |
| [22] | "HBD"          | "HBG1"         | "HBG2"         | "HIST2H2AA3"   | "HLA-F"        | "ICAM3"        | "IMPA2"        |
| [29] | "LOC100008589" | "LOC100128326" | "LOC100129681" | "LOC100130914" | "LOC100131164" | "LOC100131726" | "LOC100132394" |
| [36] | "LOC100134530" | "LOC100134634" | "LOC389386"    | "LOC389599"    | "LOC401357"    | "LOC440313"    | "LOC440359"    |

[43] "LOC642357" "LOC642469" "LOC643319" "LOC643384" "LOC644852" "LOC645173" "LOC648390"  
 [50] "LOC729021" "LOC729660" "LOC730286" "MAP1S" "MT1A" "MUC6" "MYL12A"  
 [57] "NT5C3" "PI3" "PPM1F" "PRIC285" "RBM38" "RPS5" "SELENBP1"  
 [64] "SERPINA13" "SIGLEC14" "SLC25A37" "SLC25A39" "SNCA" "SORL1" "SPRYD3"  
 [71] "STRADB" "TBLX" "TMEM140" "TSPAN5" "TXNDC12" "TYMP" "UBXN6"  
 [78] "WDR40A"

\$CC\_resis\_ctrTang

[1] "AIF1" "ANP32E" "ATOX1" "ATP5E" "B2M" "BANK1" "BTLA" "CAMP" "CCNB2"  
 [10] "CCR7" "CD19" "CD274" "CD74" "CD79B" "CD83" "CD96" "CDCA8" "CLEC4D"  
 [19] "CLU" "COX7A2" "CR2" "CXCR5" "DHRS3" "DTX3L" "EIF4B" "EOMES" "FAIM3"  
 [28] "FCRLA" "FOXO1" "GADD45A" "GBP2" "HVCN1" "IMP3" "ITGB3" "KLRB1" "KLRG1"  
 [37] "MCEMP1" "MCTP1" "MS4A1" "MXD1" "PRPF8" "RPL13A" "RYK" "S100A6" "S100A9"  
 [46] "S1PR1" "SAMD3" "SPIB" "TGFBI" "THRA" "TMEM42" "TNFRSF13C" "TNNT1" "UHRF1"  
 [55] "VPREB3"

\$CC\_resis\_ctrWoods

[1] "CFB" "GCH1" "LGALS3BP" "MYH9" "SPTAN1" "TDRD7" "TLR7" "TRAFD1" "TREX1"

\$CC\_resis\_ctrZhai

[1] "GYPC" "GZMB" "TAGLN2" "TESC"

\$TangWoods

[1] "AIM2" "ANXA3" "APOBEC3A" "APOL6" "C1QA" "C1QB" "C2" "C3AR1" "CCRL2" "CD38"  
 [11] "CLIC4" "CXCR3" "DDX58" "EPN2" "ETV7" "PHL2" "FKBP5" "GYPA" "HIST1H4H" "IFIT5"  
 [21] "LHFPL2" "LMNB1" "MAP2K6" "MARCO" "MS4A4A" "MT2A" "NDC80" "NMI" "NOV" "PML"  
 [31] "PTGER4" "RECK" "SAMD4A" "SGK1" "SIGLEC1" "SOCS1" "SPTLC2" "SSB" "TCN1" "TCN2"  
 [41] "TFEC" "THBD" "TMEM51" "TOR1B" "TRIM14" "ZC3HAV1" "ZCCHC2"

\$TangZhai

[1] "ADM" "CASP1" "DDX60L" "DYNLT1" "EEF2" "EIF3L" "ELF1" "EMR3" "EPSTI1" "FBXO6"  
 [11] "HES4" "IFI30" "NCOA7" "PARP10" "RNASE2" "RPS3" "RPS4X" "SHISA5" "TNFSF13B"

\$WoodsZhai

[1] "CTSL1" "DPEP2" "DRAP1" "LAMP3" "LMO2" "MAFB" "PHF11" "PSME2" "SP110" "UBE2L6" "WARS"

\$CC\_resis\_ctrTangWoods

[1] "AGRN" "HP" "ITPR3" "LEF1" "LILRB4" "SP100" "SP140" "UBE2S"

\$CC\_resis\_ctrTangZhai

[1] "CMPK2" "IFITM3" "IRF9" "PARP14" "PARP9" "RNF213" "S100A8" "SAMD9L"

\$CC\_resis\_ctrWoodsZhai

[1] "CXCL10" "LGALS9" "MX2" "PARP12" "STAT2" "TMEM123"

\$TangWoodsZhai

[1] "BLVRA" "CEACAM1" "CHMP5" "DDX60" "DHRS9" "EIF2AK2" "FAM46A" "FCGR1B" "GBP1" "GLRX"  
 [11] "HERC5" "IFI16" "IFI44L" "IFI6" "IL1RN" "ISG20" "LAP3" "LY6E" "OAS1" "OASL"  
 [21] "OTOF" "PLSCR1" "SAMD9" "SAT1" "SCARB2" "SCO2" "SERPING1" "SPATS2L" "STAT1" "TAP1"  
 [31] "TIMM10" "TNFAIP6" "TNFSF10" "TRIM22" "TRIM5" "VAMP5"

\$CC\_resis\_ctrTangWoodsZhai

[1] "BST2" "DHX58" "HERC6" "IFI27" "IFI35" "IFI44" "IFIH1" "IFIT1" "IFIT2" "IFIT3" "IFITM1" "IRF7" "ISG15"  
 [14] "MX1" "OAS2" "OAS3" "PLAC8" "RSAD2" "RTP4" "USP18" "XAF1" "ZBP1"
