# Supplementary material for: Of mice and men: the host response to influenza virus infection
Source: PubMed Central journal article supplement (PMC6132725; doi:10.1007/s00335-018-9750-y), 2018-06-15
Supplement: 335_2018_9750_MOESM13_ESM.pdf [file 335_2018_9750_MOESM13_ESM.pdf]

VENN gene lists severe versus control for CC strains

\$CC\_svre\_ctr

|       |                 |                 |                 |                  |                 |                 |
|-------|-----------------|-----------------|-----------------|------------------|-----------------|-----------------|
| [1]   | "0610040J01RIK" | "1110007C09RIK" | "1110008F13RIK" | "1190002F15RIK"  | "1500011B03RIK" | "1600012P17RIK" |
| [7]   | "1600014C10RIK" | "1700007K09RIK" | "1700016P03RIK" | "1700018A04RIK"  | "1700019A02RIK" | "1700019D03RIK" |
| [13]  | "1700037H04RIK" | "1700047G07RIK" | "1700061N14RIK" | "1700111N16RIK"  | "1700112E06RIK" | "1700122H20RIK" |
| [19]  | "1810073O08RIK" | "2010107E04RIK" | "2310033P09RIK" | "2310079G19RIK"  | "2410024N13RIK" | "2610035D17RIK" |
| [25]  | "2900040C04RIK" | "2900052N01RIK" | "2900076A13RIK" | "3110021A11RIK"  | "3110062M04RIK" | "4632428N05RIK" |
| [31]  | "4732465J04RIK" | "4733401D01RIK" | "4921518K17RIK" | "4921523P09RIK"  | "4930449E01RIK" | "4930549C15RIK" |
| [37]  | "5230400M03RIK" | "5430416O09RIK" | "5430431A17RIK" | "5830416P10RIK"  | "6330416G13RIK" | "6430548M08RIK" |
| [43]  | "9030619P08RIK" | "9330151L19RIK" | "9430063H18RIK" | "9930111J21RIK1" | "A130082J08RIK" | "A230092J17RIK" |
| [49]  | "A430078G23RIK" | "A530064D06RIK" | "A630033H20RIK" | "AANAT"          | "AB124611"      | "ACMSD"         |
| [55]  | "ACOT5"         | "ACOT7"         | "ACP1"          | "ACRV1"          | "ACSL1"         | "ACTB"          |
| [61]  | "ACTG1"         | "ACTL7A"        | "ADAM15"        | "ADAM5"          | "ADAM8"         | "ADCY9"         |
| [67]  | "ADRA1B"        | "ADSSL1"        | "AF251705"      | "AGO2"           | "AKR1A1"        | "AKT1"          |
| [73]  | "ALAS1"         | "ALDH2"         | "ALDH3B1"       | "ALDH3B2"        | "ALDOA"         | "ALOX12"        |
| [79]  | "ALOX5"         | "ALOX5AP"       | "AMICA1"        | "ANK"            | "ANKRD2"        | "ANXA1"         |
| [85]  | "ANXA11"        | "ANXA2"         | "APOBR"         | "APOL9B"         | "APP"           | "ARAP3"         |
| [91]  | "ARG2"          | "ARHGAP18"      | "ARHGDIB"       | "ARHGEF10L"      | "ARID3A"        | "ARID5A"        |
| [97]  | "ARMCX6"        | "ARPC1B"        | "ARPC2"         | "ASB7"           | "ASIC3"         | "ASPRV1"        |
| [103] | "ATF7"          | "ATP11A"        | "ATP1A3"        | "ATP2A3"         | "ATP5K"         | "ATP8B3"        |
| [109] | "ATP9A"         | "AU015791"      | "AW011738"      | "AW011956"       | "AW555355"      | "AZIN1"         |
| [115] | "B430306N03RIK" | "B4GALT3"       | "BAK1"          | "BC052688"       | "BC094916"      | "BC100530"      |
| [121] | "BC147527"      | "BCL3"          | "BCL6"          | "BCR"            | "BCS1L"         | "BIN3"          |
| [127] | "BMP1"          | "BRD2"          | "BST1"          | "C030037D09RIK"  | "C130093G08RIK" | "C1GALT1C1"     |
| [133] | "C1QL2"         | "C3"            | "CSAR2"         | "C81489"         | "CALD1"         | "CALN1"         |
| [139] | "CALY"          | "CAMKV"         | "CAPN2"         | "CAPZB"          | "CAR2"          | "CAR7"          |
| [145] | "CARHSP1"       | "CASK"          | "CASP4"         | "CBR3"           | "CCDC153"       | "CCDC167"       |
| [151] | "CCDC82"        | "CCDC92"        | "CCL4"          | "CCL6"           | "CCL9"          | "CCND3"         |
| [157] | "CCR2"          | "CCR6"          | "CD14"          | "CD151"          | "CD27"          | "CD300C"        |
| [163] | "CD300LD"       | "CD300LF"       | "CD302"         | "CD33"           | "CD44"          | "CD55"          |
| [169] | "CD80"          | "CD8B1"         | "CD93"          | "CD97"           | "CDC25B"        | "CDK2AP2"       |
| [175] | "CDKN2D"        | "CDR2"          | "CDS2"          | "CEBPB"          | "CEBPD"         | "CEP68"         |
| [181] | "CFAP74"        | "CFL1"          | "CFP"           | "CHCHD10"        | "CHIL1"         | "CHST12"        |
| [187] | "CHST3"         | "CHSY1"         | "CIDEB"         | "CISD3"          | "CLEC4A1"       | "CLEC4A3"       |
| [193] | "CLEC4E"        | "CLEC7A"        | "CLIC1"         | "CMAS"           | "CMTM6"         | "CMTR1"         |
| [199] | "CNN1"          | "CNN2"          | "CNST"          | "CNTN6"          | "COG5"          | "COTL1"         |
| [205] | "COX6B2"        | "COX6C"         | "CPD"           | "CRISPLD2"       | "CRLF2"         | "CRYGF"         |
| [211] | "CRYZL1"        | "CSF2RA"        | "CSF2RB"        | "CSF2RB2"        | "CSN1S2B"       | "CSPRS"         |
| [217] | "CSRNP1"        | "CSRP1"         | "CST3"          | "CTLA2A"         | "CTLA2B"        | "CTNNBIP1"      |
| [223] | "CTRL"          | "CTSA"          | "CTSC"          | "CTSD"           | "CTSS"          | "CTSZ"          |
| [229] | "CUBDC2"        | "CUL4A"         | "CXCR2"         | "CYBA"           | "CYP21A1"       | "CYP2B10"       |
| [235] | "CYP2D11"       | "CYP4A12B"      | "CYP4B1"        | "CYP4B1-PS2"     | "CYP4F17"       | "CYP4F18"       |
| [241] | "D030029J20RIK" | "D130012P04RIK" | "D2HGDH"        | "D430041D05RIK"  | "D4ERTD681E"    | "D630029K05RIK" |
| [247] | "D830030K20RIK" | "DAPP1"         | "DAXX"          | "DCAF7"          | "DCLRE1C"       | "DCUN1D1"       |
| [253] | "DEDD2"         | "DEFA-RS2"      | "DEFA1"         | "DEFA23"         | "DEFB9"         | "DENND5A"       |
| [259] | "DFNA5"         | "DGAT1"         | "DGAT2"         | "DHCR24"         | "DHRS11"        | "DHRS7"         |
| [265] | "DIO1"          | "DLGAP4"        | "DNAH17"        | "DNAJA4"         | "DNAJB2"        | "DNAJB6"        |
| [271] | "DNAJC14"       | "DOC2A"         | "DOK3"          | "DPP6"           | "DPYSL4"        | "DSTN"          |
| [277] | "DTNB"          | "DUSP1"         | "DUSP16"        | "DUSP23"         | "DUSP8"         | "E130119H09RIK" |
| [283] | "E330014E10RIK" | "EBI3"          | "ECM1"          | "EFHD2"          | "EFS"           | "EHBPL1L1"      |
| [289] | "EHD4"          | "EIF2D"         | "EIF4EBP1"      | "ELL2"           | "ELOVL1"        | "EMB"           |
| [295] | "EME1"          | "EMILIN2"       | "ENTPD3"        | "EPHX1"          | "EPOR"          | "ERGIC3"        |
| [301] | "ERICH5"        | "ESD"           | "ETFB"          | "F10"            | "F11R"          | "F13A1"         |
| [307] | "F420015M19RIK" | "F5"            | "F830002L21RIK" | "F830014O18RIK"  | "FADS1"         | "FAM110A"       |
| [313] | "FAM216B"       | "FAM71F1"       | "FBXL5"         | "FBXO31"         | "FBXO34"        | "FBXO9"         |
| [319] | "FBXW21"        | "FCER1G"        | "FCGR1"         | "FCGR3"          | "FCGR4"         | "FCNAOS"        |
| [325] | "FERMT3"        | "FES"           | "FGF8"          | "FGFBP3"         | "FGL2"          | "FGR"           |
| [331] | "FHL5"          | "FKRP"          | "FLNA"          | "FLOT1"          | "FN1"           | "FOSL2"         |
| [337] | "FPR1"          | "FPR2"          | "FUOM"          | "FURIN"          | "FYB"           | "G6B"           |
| [343] | "G6PDX"         | "GABARAPL1"     | "GALT"          | "GAPDH"          | "GAS2L1"        | "GATA1"         |
| [349] | "GATA2"         | "GBP6"          | "GBP7"          | "GBP9"           | "GCNT2"         | "GDAP10"        |
| [355] | "GDPD2"         | "GFI1B"         | "GFRA4"         | "GKN3"           | "GLIPR1"        | "GLRX5"         |
| [361] | "GM10272"       | "GM10693"       | "GM10845"       | "GM11127"        | "GM11559"       | "GM11564"       |

|       |              |             |            |                 |                 |                 |
|-------|--------------|-------------|------------|-----------------|-----------------|-----------------|
| [367] | "GM11937"    | "GM11938"   | "GM12060"  | "GM12070"       | "GM12250"       | "GM12271"       |
| [373] | "GM13375"    | "GM14206"   | "GM14446"  | "GM14548"       | "GM15217"       | "GM15645"       |
| [379] | "GM15800"    | "GM1604B"   | "GM16501"  | "GM16510"       | "GM1966"        | "GM2044"        |
| [385] | "GM2437"     | "GM2694"    | "GM2703"   | "GM2744"        | "GM3035"        | "GM3051"        |
| [391] | "GM3181"     | "GM3224"    | "GM3265"   | "GM3448"        | "GM3455"        | "GM3627"        |
| [397] | "GM3652"     | "GM3806"    | "GM3848"   | "GM4013"        | "GM4326"        | "GM4653"        |
| [403] | "GM4871"     | "GM4951"    | "GM4955"   | "GM5068"        | "GM5069"        | "GM5150"        |
| [409] | "GM5483"     | "GM5523"    | "GM5595"   | "GM5935"        | "GM5938"        | "GM6132"        |
| [415] | "GM6293"     | "GM6498"    | "GM6934"   | "GM6981"        | "GM7193"        | "GM7475"        |
| [421] | "GM813"      | "GM826"     | "GM8709"   | "GM8884"        | "GM8909"        | "GM8995"        |
| [427] | "GM9706"     | "GM9733"    | "GNAI2"    | "GNB2"          | "GNGT2"         | "GP1BA"         |
| [433] | "GP49A"      | "GP5"       | "GP6"      | "GP9"           | "GPR137B-PS"    | "GPR157"        |
| [439] | "GPR31B"     | "GPR56"     | "GRWD1"    | "GSDMC"         | "GSDMD"         | "GSR"           |
| [445] | "GSTT1"      | "GTPBP3"    | "GVIN1"    | "GYG"           | "H13"           | "H19"           |
| [451] | "H2-BL"      | "H2-D1"     | "H2-K1"    | "H2-K2"         | "H2-M2"         | "H2-OB"         |
| [457] | "H2-Q10"     | "H2-Q2"     | "H2-Q6"    | "H2-Q7"         | "H2-Q8"         | "H2-T10"        |
| [463] | "H2-T23"     | "H2-T24"    | "H2-T9"    | "HBB-BH2"       | "HBQ1B"         | "HCAR2"         |
| [469] | "HCK"        | "HCLS1"     | "HDAC4"    | "HDC"           | "HEBP1"         | "HES7"          |
| [475] | "HEXIM2"     | "HEYL"      | "HGSNAT"   | "HHAT"          | "HIPK1"         | "HIST1H3C"      |
| [481] | "HIST2H2AA1" | "HIST3H2BA" | "HMGCL"    | "HMGN2"         | "HMOX1"         | "HPCAL1"        |
| [487] | "HSCB"       | "HSD17B11"  | "HSH2D"    | "I830012O16RIK" | "I830077J02RIK" | "I830127L07RIK" |
| [493] | "ICAL1"      | "IFI202B"   | "IFI203"   | "IFI204"        | "IFI27L2A"      | "IFI47"         |
| [499] | "IFITM2"     | "IFITM6"    | "IFNA14"   | "IFRD2"         | "IGF1"          | "IGFBP6"        |
| [505] | "IGHV14-2"   | "IGSF6"     | "IGSF9B"   | "IGTP"          | "IL18BP"        | "IL1B"          |
| [511] | "IL1F9"      | "IL1R2"     | "IL4I1"    | "IL6RA"         | "ILK"           | "IMPG1"         |
| [517] | "INF2"       | "IRF1"      | "IRF6"     | "IRG1"          | "IRGM1"         | "IRGM2"         |
| [523] | "ITGA6"      | "ITGAL"     | "ITGB1"    | "ITGB5"         | "ITM2B"         | "JARID2"        |
| [529] | "JUN"        | "KCNB3"     | "KCNN3"    | "KLHL25"        | "KLHL32"        | "KLKB4"         |
| [535] | "KLRA2"      | "KPNA6"     | "KRT6B"    | "KRT73"         | "LAMP1"         | "LAMP2"         |
| [541] | "LANCL3"     | "LARP1B"    | "LCP1"     | "LEFTY2"        | "LGALS1"        | "LGALS3"        |
| [547] | "LGALSL"     | "LHX9"      | "LIN52"    | "LITAF"         | "LOC100038947"  | "LOC102636217"  |
| [553] | "LOC547349"  | "LOC676689" | "LOC68395" | "LRG1"          | "LRRC25"        | "LRRTM1"        |
| [559] | "LSP1"       | "LST1"      | "LTB4R1"   | "LTBP1"         | "LTBR"          | "LY6A"          |
| [565] | "LY6C1"      | "LY6G6C"    | "LY6K"     | "LYZ1"          | "LYZ2"          | "MADCAM1"       |
| [571] | "MAGED2"     | "MARCH7"    | "MARCH8"   | "MARCKS"        | "MARCKSL1"      | "MAST2"         |
| [577] | "MBD3"       | "MBNL2"     | "MBOAT7"   | "MC3R"          | "MCL1"          | "MCUR1"         |
| [583] | "MEF2C"      | "MEFV"      | "MEIS3"    | "MEMO1"         | "MESP2"         | "METAP2"        |
| [589] | "METRNL"     | "METTL7A1"  | "MFSB6"    | "MGAT5B"        | "MGMT"          | "MGST1"         |
| [595] | "MIDN"       | "MLANA"     | "MMD"      | "MMP17"         | "MMP8"          | "MNDA"          |
| [601] | "MOCOS"      | "MOV10"     | "MPC2"     | "MPEG1"         | "MPL"           | "MRAP2"         |
| [607] | "MRAS"       | "MRGBP"     | "MRGPRA2A" | "MRGPRA2B"      | "MRGPRA6"       | "MRPL33"        |
| [613] | "MRV11"      | "MS4A4C"    | "MS4A6C"   | "MS4A6D"        | "MS4A8A"        | "MSGN1"         |
| [619] | "MSRA"       | "MSRB1"     | "MTMR14"   | "MTMR3"         | "MTUS1"         | "MVB12A"        |
| [625] | "MYD88"      | "MYL3"      | "MYO1D"    | "MYO1F"         | "NAAA"          | "NADK"          |
| [631] | "NADK2"      | "NAIP2"     | "NAMPT"    | "NCF2"          | "NCF4"          | "NCK2"          |
| [637] | "NCOA1"      | "NDEL1"     | "NES"      | "NFAM1"         | "NFE2"          | "NFIL3"         |
| [643] | "NFKBIA"     | "NGFRAP1"   | "NINJ1"    | "NKIRAS2"       | "NKX2-2"        | "NLRC5"         |
| [649] | "NLRX1"      | "NME1"      | "NOC4L"    | "NOD1"          | "NOD2"          | "NOMO1"         |
| [655] | "NOS1"       | "NPRL3"     | "NPTN"     | "NRGN"          | "NRON"          | "NRROS"         |
| [661] | "NRTN"       | "NUAK1"     | "NUDT3"    | "NUDT4"         | "NUPR1"         | "OAS1A"         |
| [667] | "OAS1C"      | "OAS1F"     | "OASL1"    | "OASL2"         | "OBOX1"         | "ODC1"          |
| [673] | "OGDH"       | "OGFR"      | "OGT"      | "OLFR1211"      | "OLFR1466"      | "OLFR209"       |
| [679] | "OLFR324"    | "OLFR394"   | "OLFR406"  | "OLFR458"       | "OLFR522"       | "OLFR545"       |
| [685] | "OLFR631"    | "OLFR635"   | "OLFR700"  | "OLFR704"       | "ONECUT2"       | "OSER1"         |
| [691] | "OSGIN1"     | "OSTF1"     | "OTOS"     | "OTUD5"         | "OTUD7B"        | "OVCH2"         |
| [697] | "P2RY13"     | "PABPC1"    | "PABPC4L"  | "PACSLN2"       | "PAQR6"         | "PARVB"         |
| [703] | "PCGF5"      | "PCX"       | "PDGFA"    | "PDLIM7"        | "PEX11G"        | "PF4"           |
| [709] | "PFKFB4"     | "PGA5"      | "PGAM1"    | "PGD"           | "PGLYRP1"       | "PGM5"          |
| [715] | "PHF11A"     | "PHF11B"    | "PHF11D"   | "PHLDA3"        | "PI16"          | "PIK3R6"        |
| [721] | "PILRA"      | "PILRB2"    | "PIN1RT1"  | "PIRA11"        | "PIRA2"         | "PIRA6"         |
| [727] | "PIRA7"      | "PIRB"      | "PKM"      | "PLA2G7"        | "PLAUR"         | "PLD4"          |
| [733] | "PLEK"       | "PLEKHG5"   | "PLEKH02"  | "PLIN2"         | "PLP1"          | "PLXNA4"        |
| [739] | "PLXNB2"     | "PNKP"      | "PNLDC1"   | "PNMA3"         | "PNP"           | "PODNL1"        |

|       |             |             |              |            |            |             |
|-------|-------------|-------------|--------------|------------|------------|-------------|
| [745] | "POLR2A"    | "POLR3H"    | "POR"        | "POU3F1"   | "POU6F2"   | "PPBP"      |
| [751] | "PPDPF"     | "PPIF"      | "PPOX"       | "PPP1R14C" | "PPP1R15A" | "PPP1R2"    |
| [757] | "PPP1R3D"   | "PRAM1"     | "PRDX2"      | "PRDX5"    | "PRDX6"    | "PREB"      |
| [763] | "PRKAB1"    | "PRKAB2"    | "PRKX"       | "PRL2A1"   | "PRMT7"    | "PRND"      |
| [769] | "PROSER2"   | "PRR5L"     | "PRRG2"      | "PRRT1"    | "PSAP"     | "PSMB10"    |
| [775] | "PSMB5"     | "PSMB8"     | "PTCHD1"     | "PTGS1"    | "PTK2B"    | "PTP4A3"    |
| [781] | "PTPLAD2"   | "PTPN1"     | "PTPN11"     | "PTPN18"   | "PTPRD"    | "PTPRH"     |
| [787] | "PTPRJ"     | "PTRF"      | "PTTG1IP"    | "PYDC3"    | "PYGL"     | "PYHIN1"    |
| [793] | "QK"        | "QSOX1"     | "RAB31"      | "RAB32"    | "RAB3IL1"  | "RAB44"     |
| [799] | "RALB"      | "RAN"       | "RANBP10"    | "RARA"     | "RASGRP2"  | "RASGRP2"   |
| [805] | "RASGRP4"   | "RB1"       | "RBBP4"      | "RBM19"    | "RBM3"     | "RBM33"     |
| [811] | "RBM47"     | "RBPMS2"    | "REN2"       | "REP15"    | "RETNLG"   | "RFK"       |
| [817] | "RFXANK"    | "RGS2"      | "RGS20"      | "RGS21"    | "RGS3"     | "RGS7"      |
| [823] | "RHOG"      | "RHOU"      | "RHOX7"      | "RND1"     | "RNF11"    | "RNF114"    |
| [829] | "RNF149"    | "RNF19B"    | "RNF31"      | "RNPEP"    | "RSU1"     | "RTN3"      |
| [835] | "S100A11"   | "S100A4"    | "SAA1"       | "SAA3"     | "SAMHD1"   | "SBN02"     |
| [841] | "SCAMP1"    | "SCARB1"    | "SCGB1A1"    | "SCNN1A"   | "SCRG1"    | "SEC61B"    |
| [847] | "SELK"      | "SELP1G"    | "SEMA4A"     | "SEMA6B"   | "SENP3"    | "SERPINA3G" |
| [853] | "SERPINB6A" | "SERPINB6C" | "SFN"        | "SFXN5"    | "SH3BGL3"  | "SH3BP2"    |
| [859] | "SH3D21"    | "SHISA9"    | "SIGMAR1"    | "SIRPA"    | "SIRPB1A"  | "SIRPB1B"   |
| [865] | "SKAP2"     | "SLA"       | "SLAMF1"     | "SLC10A1"  | "SLC11A1"  | "SLC15A3"   |
| [871] | "SLC16A3"   | "SLC22A1"   | "SLC24A3"    | "SLC25A51" | "SLC27A4"  | "SLC28A2"   |
| [877] | "SLC2A3"    | "SLC2A6"    | "SLC38A5"    | "SLC39A1"  | "SLC40A1"  | "SLC44A1"   |
| [883] | "SLC4A2"    | "SLC6A1"    | "SLC6A4"     | "SLC7A7"   | "SLFN1"    | "SLFN10-PS" |
| [889] | "SLFN13L"   | "SLFN2"     | "SLFN3"      | "SLFN4"    | "SLPI"     | "SMC4"      |
| [895] | "SMIM3"     | "SMPDL3A"   | "SMTN"       | "SNAP23"   | "SNRNP25"  | "SNX15"     |
| [901] | "SNX20"     | "SNX32"     | "SNX9"       | "SOCS3"    | "SOD2"     | "SORD"      |
| [907] | "SOWAHA"    | "SPAG17OS"  | "SPEER1-PS1" | "SPEF1"    | "SPI1"     | "SPOB"      |
| [913] | "SPPL2A"    | "SPRN"      | "SPRR1A"     | "SPTA1"    | "SQRD1"    | "SRM"       |
| [919] | "SRPX2"     | "SRXN1"     | "SSBP2"      | "SSBP4"    | "SSX9"     | "SSXB9"     |
| [925] | "ST3GAL5"   | "STARD3"    | "STAT3"      | "STFA1"    | "STFA2"    | "STFA2L1"   |
| [931] | "STFA3"     | "STK40"     | "SVIL"       | "SYCN"     | "TAAR4"    | "TAB3"      |
| [937] | "TAGLN"     | "TAL1"      | "TAPBP"      | "TAS2R131" | "TBC1D2"   | "TBC1D22A"  |
| [943] | "TBKBP1"    | "TBXAS1"    | "TCSTV1"     | "TCTE1"    | "TCTEX1D2" | "TDRP"      |
| [949] | "TEAD1"     | "TENM4"     | "TFAP2D"     | "TFDP2"    | "TFE3"     | "TGFBI"     |
| [955] | "TGFBI11"   | "TGIF2"     | "TGM2"       | "TGTP2"    | "THBS1"    | "THEMIS2"   |
| [961] | "TIMM10B"   | "TIMM17B"   | "TIMP2"      | "TIRAP"    | "TLDC2"    | "TLN1"      |
| [967] | "TLR13"     | "TLR2"      | "TLR6"       | "TM4SF5"   | "TMA7"     | "TMBIM1"    |
| [973] | "TMBIM6"    | "TMEM116"   | "TMEM178"    | "TMEM219"  | "TMEM246"  | "TMEM256"   |
| [979] | "TMEM29"    | "TMEM40"    | "TMEM50B"    | "TMEM87A"  | "TMEM8C"   | "TMOD4"     |
| [985] | "TMSB4X"    | "TMTC3"     | "TNFAIP2"    | "TNFRSF1A" | "TNFRSF1B" | "TNFRSF14"  |
| [991] | "TNP1"      | "TOM1"      | "TOR1AIP1"   | "TOR1AIP2" | "TOR3A"    | "TPD52"     |
| [997] | "TP11"      | "TPM1"      | "TPM2"       | "TPM3"     |            |             |

[ reached getopt("max.print") -- omitted 100 entries ]

\$Tang

|       |              |             |                |            |            |               |           |
|-------|--------------|-------------|----------------|------------|------------|---------------|-----------|
| [1]   | "A1BG"       | "A2M-AS1"   | "ABCA1"        | "ABHD14B"  | "ABLIM1"   | "ACADSB"      | "ACAT1"   |
| [8]   | "ACCS"       | "ACKR3"     | "ACOT13"       | "ACOXL"    | "ACRBP"    | "ADAMTS10"    | "ADARB1"  |
| [15]  | "ADCY4"      | "ADRB2"     | "AES"          | "AKAP11"   | "AKIRIN2"  | "ALG13"       | "AMIGO1"  |
| [22]  | "AMPD2"      | "ANK3"      | "ANKRD22"      | "ANKRD36"  | "ANKRD46"  | "ANKS6"       | "ANXA8L1" |
| [29]  | "AP5B1"      | "APBA2"     | "APOBEC3B"     | "APOBEC3H" | "AQP1"     | "AQP10"       | "ARG1"    |
| [36]  | "ARHGAP5"    | "ARHGAP40"  | "ARL17A"       | "ARL4A"    | "ARL4C"    | "ARNTL"       | "ARPC3"   |
| [43]  | "ARPC5"      | "ASGR2"     | "ASPH"         | "ASPM"     | "ATF1"     | "ATP5E"       | "ATP5I"   |
| [50]  | "ATP5J"      | "ATP6"      | "ATP6V0E2-AS1" | "AUTS2"    | "B4GALT5"  | "BAALC"       | "BACH2"   |
| [57]  | "BAHD1"      | "BANK1"     | "BATF2"        | "BCL11A"   | "BCL11B"   | "BCL2A1"      | "BIRC3"   |
| [64]  | "BIRC5"      | "BLK"       | "BRD1"         | "BTG1"     | "BTLA"     | "BTN3A1"      | "BUB1"    |
| [71]  | "B2RAP1-AS1" | "C10orf105" | "C12orf57"     | "C16orf74" | "C1orf52"  | "C20orf141"   | "C2orf40" |
| [78]  | "C2orf88"    | "C4orf33"   | "C5orf45"      | "C6orf48"  | "CA2"      | "CACNA1E"     | "CACNG6"  |
| [85]  | "CAMK1D"     | "CAMP"      | "CARD11"       | "CARD16"   | "CARD17"   | "CARD6"       | "CASC15"  |
| [92]  | "CASC5"      | "CBLB"      | "CBX7"         | "CCDC102A" | "CCDC144A" | "CCDC147-AS1" | "CCNB1"   |
| [99]  | "CCNB2"      | "CCR3"      | "CCR7"         | "CD164"    | "CD177"    | "CD19"        | "CD2"     |
| [106] | "CD22"       | "CD247"     | "CD28"         | "CD300E"   | "CD3E"     | "CD40LG"      | "CD5"     |
| [113] | "CD6"        | "CD7"       | "CD74"         | "CD79B"    | "CD81"     | "CD83"        | "CD8A"    |

|       |              |             |               |              |               |             |              |
|-------|--------------|-------------|---------------|--------------|---------------|-------------|--------------|
| [120] | "CD8B"       | "CD96"      | "CDC20"       | "CDC42SE1"   | "CDC45"       | "CDCA2"     | "CDCA3"      |
| [127] | "CDCA5"      | "CDK1"      | "CDK11A"      | "CDK11B"     | "CDKN2C"      | "CDKN3"     | "CDT1"       |
| [134] | "CDV3"       | "CENPF"     | "CENPM"       | "CENPN"      | "CENPU"       | "CENPW"     | "CEP19"      |
| [141] | "CES1"       | "CFAP97"    | "CHEK1"       | "CHIT1"      | "CHPT1"       | "CHRM3-AS2" | "CISD2"      |
| [148] | "CIT"        | "CKAP4"     | "CKLF"        | "CKS1B"      | "CKS2"        | "CLEC10A"   | "CLEC11A"    |
| [155] | "CLEC12A"    | "CLUHP3"    | "CMT5"        | "CNIH4"      | "CNR2"        | "CNTNAP3"   | "COQ10A"     |
| [162] | "COX17"      | "COX7A2"    | "COX7B"       | "CR1"        | "CR2"         | "CREG1"     | "CRHR1-IT1"  |
| [169] | "CRIP2"      | "CROCC"     | "CRTC1"       | "CSGALNACT2" | "CSTA"        | "CTNNAL1"   | "CTSL"       |
| [176] | "CTTN"       | "CXCR5"     | "CYB561A3"    | "CYSTM1"     | "CYTH3"       | "DCAF16"    | "DDAH2"      |
| [183] | "DEFA8P"     | "DENND2D"   | "DHFR"        | "DIAPH3"     | "DISC1"       | "DLGAP5"    | "DNAJA1P5"   |
| [190] | "DNAJA3"     | "DNAJC30"   | "DNAJC5"      | "DOCK10"     | "DPP4"        | "DPRXP4"    | "DRC1"       |
| [197] | "DTL"        | "DUSP13"    | "DUT"         | "DYRK2"      | "E2F1"        | "E2F7"      | "ECRP"       |
| [204] | "EEF1A1"     | "EEF2K"     | "EIF1AX"      | "EIF3F"      | "EIF4A2"      | "EIF4B"     | "EIF4G3"     |
| [211] | "ENHO"       | "ENO2"      | "ENY2"        | "EOMES"      | "EPHX2"       | "ERN1"      | "ESPL1"      |
| [218] | "ESRG"       | "EVL"       | "EZH2"        | "FABP5"      | "FAIM3"       | "FAM102A"   | "FAM117B"    |
| [225] | "FAM129C"    | "FAM134B"   | "FAM155A-IT1" | "FAM159A"    | "FAM177B"     | "FAM20A"    | "FAM26F"     |
| [232] | "FAM27C"     | "FANCF"     | "FANCI"       | "FBL"        | "FBLN5"       | "FBXL16"    | "FCAR"       |
| [239] | "FCER1A"     | "FCER2"     | "FCGBP"       | "FCGR1A"     | "FCN1"        | "FCRL1"     | "FCRL2"      |
| [246] | "FCRL3"      | "FCRL6"     | "FCRLA"       | "FFAR3"      | "FGD4"        | "FLT3LG"    | "FOXJ3"      |
| [253] | "FOXM1"      | "FOXO1"     | "FRMD3"       | "FSD1"       | "FSTL3"       | "FTL"       | "G0S2"       |
| [260] | "GADD45A"    | "GADD45G"   | "GALM"        | "GALNT14"    | "GATA3"       | "GCSAM"     | "GDF15"      |
| [267] | "GINS1"      | "GINS2"     | "GLCC11"      | "GLIPR2"     | "GLS"         | "GLTSCR2"   | "GMFG"       |
| [274] | "GMNN"       | "GNB2L1"    | "GNG10"       | "GOLGA8A"    | "GPA33"       | "GPD2"      | "GPER1"      |
| [281] | "GPR141"     | "GPR174"    | "GPR18"       | "GPR183"     | "GPR68"       | "GPR84"     | "GPRASP1"    |
| [288] | "GRB10"      | "GRPEL2"    | "GSTM3"       | "GTF2H5"     | "GTSE1"       | "GVINP1"    | "GYG1"       |
| [295] | "GZMK"       | "GZMM"      | "H1F0"        | "HABP4"      | "HAPLN3"      | "HBM"       | "HCG18"      |
| [302] | "HBLZ2"      | "HES6"      | "HIP1R"       | "HIST1H1B"   | "HIST1H2AC"   | "HIST1H2AD" | "HIST1H2AE"  |
| [309] | "HIST1H2AH"  | "HIST1H2AI" | "HIST1H2AJ"   | "HIST1H2AL"  | "HIST1H2AM"   | "HIST1H2BB" | "HIST1H2BC"  |
| [316] | "HIST1H2BD"  | "HIST1H2BE" | "HIST1H2BF"   | "HIST1H2BG"  | "HIST1H2BH"   | "HIST1H2BI" | "HIST1H2BJ"  |
| [323] | "HIST1H2BK"  | "HIST1H2BL" | "HIST1H2BM"   | "HIST1H2BO"  | "HIST1H3B"    | "HIST1H3D"  | "HIST1H3F"   |
| [330] | "HIST1H3H"   | "HIST1H3J"  | "HIST1H4D"    | "HIST1H4F"   | "HIST1H4K"    | "HIST1H4L"  | "HIST2H2AA4" |
| [337] | "HIST2H2AB"  | "HIST2H3A"  | "HJURP"       | "HLA-DOA"    | "HLA-DOB"     | "HLA-DPA1"  | "HLA-DPB1"   |
| [344] | "HLA-DPB2"   | "HLA-DQA2"  | "HLA-DQB1"    | "HLA-DQB2"   | "HLA-DRA"     | "HLA-DRB3"  | "HMGB1"      |
| [351] | "HMGB3P1"    | "HMMR"      | "HNRNPA1"     | "HNRNPH1"    | "HOXB2"       | "HP1BP3"    | "HPR"        |
| [358] | "HRASLS2"    | "HS3ST1"    | "HSP90AA1"    | "ICOS"       | "IFFO2"       | "IFI27L1"   | "IFI27L2"    |
| [365] | "IFITM4P"    | "IFT20"     | "IGFBP7"      | "IGJ"        | "IGLL1"       | "IGLL5"     | "IKZF2"      |
| [372] | "IL10RB-AS1" | "IL11RA"    | "IL18R1"      | "IL18RAP"    | "IL1RAP"      | "IL23A"     | "IL27"       |
| [379] | "IL2RB"      | "IL32"      | "IL7R"        | "IMP3"       | "ING5"        | "INHBA"     | "INPP4B"     |
| [386] | "INPP5E"     | "IRAK3"     | "ISCA1"       | "ISY1"       | "ITGA7"       | "ITIH4"     | "ITK"        |
| [393] | "JDP2"       | "JPH4"      | "KCNG1"       | "KDF1"       | "KIAA0101"    | "KIAA0226L" | "KIAA0319L"  |
| [400] | "KIAA0355"   | "KIAA1147"  | "KIF11"       | "KIF1B"      | "KIF2C"       | "KLF12"     | "KLHDC7B"    |
| [407] | "KLHDC8B"    | "KLHL3"     | "KLRB1"       | "KLRC3"      | "KLRC4"       | "KLRG1"     | "KRTAP10-6"  |
| [414] | "LAT"        | "LBH"       | "LCK"         | "LDDRAP1"    | "LEF1-AS1"    | "LEPROTL1"  | "LILRA3"     |
| [421] | "LILRA5"     | "LILRB3"    | "LIN7A"       | "LIPN"       | "LLGL2"       | "LMF1"      | "LOXL3"      |
| [428] | "LPIN1"      | "LRFN3"     | "LRIG1"       | "LRRC47"     | "LRRN3"       | "LSM3"      | "LTB4R"      |
| [435] | "LTBP3"      | "LTF"       | "LY9"         | "LY96"       | "MAL"         | "MAMSTR"    | "MAN1C1"     |
| [442] | "MAOA"       | "MAP1LC3B"  | "MAPK14"      | "MATK"       | "MB21D1"      | "MCF2L-AS1" | "MCM2"       |
| [449] | "MCM4"       | "MCTP1"     | "MEAF6"       | "MEGF6"      | "MEX3C"       | "MEX3D"     | "MGAM"       |
| [456] | "MGCI6025"   | "MGLL"      | "MILR1"       | "MIR146A"    | "MIR4435-1HG" | "MKI67"     | "MLLT6"      |
| [463] | "MME"        | "MOAP1"     | "MPO"         | "MRC2"       | "MRPL22"      | "MRPL27"    | "MRPL51"     |
| [470] | "MRPS18C"    | "MS4A1"     | "MSN"         | "MSX2P1"     | "MT1B"        | "MT1E"      | "MT1HL1"     |
| [477] | "MT1L"       | "MT1M"      | "MTA1"        | "MXD4"       | "MXI1"        | "MXRA7"     | "MYBL1"      |
| [484] | "MYBL2"      | "MYBPC3"    | "MYC"         | "MYCL"       | "MYL6"        | "MYL6B"     | "NAB2"       |
| [491] | "NAIP"       | "NAP1L1"    | "NCR3"        | "ND6"        | "NDST2"       | "NDUFA1"    | "NDUFA4"     |
| [498] | "NDUFA6"     | "NDUFB3"    | "NELL2"       | "NEXN"       | "NKTR"        | "NXX3-1"    | "NLRC3"      |
| [505] | "NLRC4"      | "NMUR1"     | "NOP10"       | "NRIR"       | "NSG1"        | "NT5C3A"    | "NT5E"       |
| [512] | "NT5M"       | "NTNG2"     | "NTSR1"       | "NUSAP1"     | "OBFC1"       | "ODF3B"     | "OIP5"       |
| [519] | "OPLAH"      | "OR52K2"    | "OSCAR"       | "OXNAD1"     | "P2RX5"       | "P2RY10"    | "PAK5"       |
| [526] | "PCED1B"     | "PCMT1"     | "PCNA"        | "PCSK1N"     | "PDE4DIP"     | "PDP1"      | "PEBP1"      |
| [533] | "PHC3"       | "PHF19"     | "PID1"        | "PIK3AP1"    | "PIK3C2B"     | "PIN4"      | "PIWIL4"     |
| [540] | "PJA1"       | "PKIA"      | "PKMYT1"      | "PLBD1"      | "PLCG1"       | "PLEKHA1"   | "PLEKHB1"    |
| [547] | "PLEKHG4"    | "PLXDC1"    | "PLXNA1"      | "PMEPA1"     | "PNMA1"       | "PNRC1"     | "POLG2"      |
| [554] | "POLRMT"     | "PP7080"    | "PPARD"       | "PPIB"       | "PQLC1"       | "PRC1"      | "PRDX4"      |

|       |            |              |             |            |             |            |             |
|-------|------------|--------------|-------------|------------|-------------|------------|-------------|
| [561] | "PREPL"    | "PRKAG2-AS1" | "PRKAR1B"   | "PRKAR2B"  | "PRKCA"     | "PRKCH"    | "PRKCQ-AS1" |
| [568] | "PRNP"     | "PRPF8"      | "PRRG4"     | "PRUNE2"   | "PSIP1"     | "PSMA2"    | "PSMA3"     |
| [575] | "PSMA4"    | "PSMA6"      | "PSMC2"     | "PSMF1"    | "PTCRA"     | "PTGDR"    | "PTGDR2"    |
| [582] | "PTPRK"    | "PTTG1"      | "PTTG2"     | "PTX3"     | "PURA"      | "PYCR1"    | "RAB11FIP3" |
| [589] | "RAB13"    | "RABL2A"     | "RAD21"     | "RAD51"    | "RAD54L"    | "RAI1"     | "RALGAP1"   |
| [596] | "RARA-AS1" | "RASGRP1"    | "RBM20"     | "RBX1"     | "RCAN3"     | "REC8"     | "RECQL4"    |
| [603] | "RETN"     | "RFTN1"      | "RGL4"      | "RHOH"     | "RMI2"      | "RNA5-8S5" | "RNASE1"    |
| [610] | "RNF208"   | "RNF32"      | "RNF44"     | "RORC"     | "RPA3"      | "RPL10A"   | "RPL10L"    |
| [617] | "RPL13"    | "RPL13A"     | "RPL15"     | "RPL18"    | "RPL18A"    | "RPL19P12" | "RPL22"     |
| [624] | "RPL22L1"  | "RPL23A"     | "RPL23AP7"  | "RPL26L1"  | "RPL29"     | "RPL29P2"  | "RPL3"      |
| [631] | "RPL4"     | "RPL5"       | "RPL7A"     | "RPLP2"    | "RPS13"     | "RPS14"    | "RPS16"     |
| [638] | "RPS18"    | "RPS2"       | "RPS23"     | "RPS27A"   | "RPS27L"    | "RPS28"    | "RPS2P32"   |
| [645] | "RPS6KA5"  | "RPSAP9"     | "RRAGD"     | "RRAS2"    | "RRBP1"     | "RSAD1"    | "RSPH9"     |
| [652] | "RTN1"     | "RUNX3"      | "RYK"       | "S100A12"  | "S100P"     | "S100PBP"  | "S1PR1"     |
| [659] | "SACS"     | "SAMD3"      | "SAMSN1"    | "SAP30"    | "SARDH"     | "SARM1"    | "SBK1"      |
| [666] | "SCAI"     | "SCARF1"     | "SCARN17"   | "SCML4"    | "SDC1"      | "SEC11C"   | "SELM"      |
| [673] | "SEMA4C"   | "Sep 01"     | "SERTAD2"   | "SF3B6"    | "SFI1"      | "SGK223"   | "SH2D1B"    |
| [680] | "SH2D3A"   | "SH3YL1"     | "SHCBP1"    | "SIDT1"    | "SIGLEC17P" | "SIGLEC5"  | "SIPAL12"   |
| [687] | "SIT1"     | "SKAP1"      | "SLC1A3"    | "SLC22A15" | "SLC22A4"   | "SLC25A6"  | "SLC26A11"  |
| [694] | "SLC26A8"  | "SLC38A1"    | "SLC45A3"   | "SLC6A19"  | "SLED1"     | "SLIRP"    | "SMA4"      |
| [701] | "SMARCD3"  | "SMC1A"      | "SMPD3"     | "SNAR-B2"  | "SNAR-D"    | "SNAR-H"   | "SNHG6"     |
| [708] | "SNORA54"  | "SNORD105B"  | "SNORD46"   | "SNORD68"  | "SNRPD1"    | "SNRPG"    | "SNX22"     |
| [715] | "SPAG5"    | "SPC24"      | "SPC25"     | "SPCS3"    | "SPIB"      | "SPOCK2"   | "SRGAP2B"   |
| [722] | "SRP19"    | "SRSF10"     | "SRSF8"     | "ST6GAL1"  | "STAB1"     | "STAC3"    | "STAT4"     |
| [729] | "STK26"    | "STMN3"      | "STOM"      | "STRBP"    | "SUB1"      | "SUN1"     | "SUSD6"     |
| [736] | "TAGAP"    | "TANK"       | "TC2N"      | "TCF7"     | "TCL1A"     | "TCIN1"    | "TFDP1"     |
| [743] | "THRA"     | "TIGD3"      | "TIMM8B"    | "TK1"      | "TLE2"      | "TLR5"     | "TMCC1"     |
| [750] | "TMEM106B" | "TMEM109"    | "TMEM119"   | "TMEM204"  | "TMEM209"   | "TMEM243"  | "TMEM25"    |
| [757] | "TMEM263"  | "TMEM42"     | "TNFRSF13C" | "TNFRSF17" | "TNFRSF25"  | "TOP1MT"   | "TP53I3"    |
| [764] | "TPST1"    | "TPX2"       | "TRABD2A"   | "TRAF1"    | "TRAF5"     | "TRAK1"    | "TRG-AS1"   |
| [771] | "TRGV7"    | "TRIM34"     | "TRIM4"     | "TRIM54"   | "TROAP"     | "TSHZ1"    | "TSPAN3"    |
| [778] | "TSPYL4"   | "TTC3"       | "TUBE1"     | "TXN"      | "TXNDC5"    | "TYMS"     | "UBASH3A"   |
| [785] | "UBE2L3"   | "UBE2Q2"     | "UBE2T"     | "UBE2V1"   | "UCHL1"     | "UHRF1"    | "UNCX"      |
| [792] | "UPP1"     | "UQCRB"      | "UQCRQ"     | "USP41"    | "VEGFA"     | "VEGFB"    | "VNN1"      |
| [799] | "VPS13C"   | "VPS37C"     | "WDR86"     | "WFDC3"    | "ZAP70"     | "ZBED6CL"  | "ZBTB11"    |
| [806] | "ZBTB32"   | "ZBTB4"      | "ZBTB40"    | "ZCCHC14"  | "ZDHHC11"   | "ZFP62"    | "ZFYVE28"   |
| [813] | "ZMAT1"    | "ZNF12"      | "ZNF204P"   | "ZNF205"   | "ZNF286B"   | "ZNF529"   | "ZNF550"    |
| [820] | "ZNF684"   | "ZNF831"     | "ZNF837"    | "ZNF90"    | "ZSCAN18"   | "ZSWIM7"   | "ZWINT"     |
| [827] | "ZXDB"     |              |             |            |             |            |             |

\$Woods

|      |            |            |
|------|------------|------------|
| [1]  | "ABAT"     | "ABCA2"    |
| [3]  | "ABCC6"    | "ACOT9"    |
| [5]  | "ADAMTS5"  | "AFF1"     |
| [7]  | "ANPEP"    | "AP1M2"    |
| [9]  | "APOBEC3G" | "APOL1"    |
| [11] | "ARHGAP32" | "ARL3"     |
| [13] | "ART3"     | "ATF3"     |
| [15] | "ATP2B2"   | "ATP6V1A"  |
| [17] | "BAGE"     | "BATF3"    |
| [19] | "BPY2"     | "BRCA2"    |
| [21] | "C10orf84" | "C11orf75" |
| [23] | "C18orf25" | "C19orf66" |
| [25] | "C1GALT1"  | "C1orf106" |
| [27] | "C22orf28" | "C9orf91"  |
| [29] | "CA4"      | "CACNA1A"  |
| [31] | "CASP5"    | "CASS4"    |
| [33] | "CCL2"     | "CCL8"     |
| [35] | "CCNA1"    | "CCR1"     |
| [37] | "CD2AP"    | "CDKN1A"   |
| [39] | "CDKN1C"   | "CENPI"    |
| [41] | "CFTR"     | "CMKLR1"   |
| [43] | "CNP"      | "COBLL1"   |

|       |                         |                    |
|-------|-------------------------|--------------------|
| [45]  | "CPB1"                  | "CPEB3"            |
| [47]  | "CRYAB"                 | "CST4"             |
| [49]  | "CT62"                  | "CWH43"            |
| [51]  | "CXCL6"                 | "CxorF21"          |
| [53]  | "DAAM2"                 | "DDO"              |
| [55]  | "DNAJC15"               | "DPEP3"            |
| [57]  | "DUSP5"                 | "DUX1"             |
| [59]  | "EGR2"                  | "ENPP2"            |
| [61]  | "EPB41L3"               | "EPB41L4A"         |
| [63]  | "EPHA4"                 | "EPHB2"            |
| [65]  | "EPS8"                  | "FAM70A"           |
| [67]  | "FANCA"                 | "FANCL"            |
| [69]  | "FCGR1A /// FCGR1C"     | "FCGR2B"           |
| [71]  | "FFAR2"                 | "FTSJD2"           |
| [73]  | "FUT4"                  | "FZD5"             |
| [75]  | "GALNT3"                | "GCH1"             |
| [77]  | "GK"                    | "GOLGA6L4 /// PML" |
| [79]  | "GRAMD1C"               | "GSTA1"            |
| [81]  | "GTPBP2"                | "GUCA1A"           |
| [83]  | "HBE1"                  | "HESX1"            |
| [85]  | "HEY1"                  | "HFE"              |
| [87]  | "HGF"                   | "ICA1"             |
| [89]  | "ID3"                   | "IDO1"             |
| [91]  | "IDS"                   | "IGF2R"            |
| [93]  | "IL10"                  | "IL15"             |
| [95]  | "IRS2"                  | "ITGB4"            |
| [97]  | "JUP"                   | "KAZ"              |
| [99]  | "KCND1"                 | "KCNK10"           |
| [101] | "KCTD14"                | "KIAA0226"         |
| [103] | "KIAA1324"              | "KIT"              |
| [105] | "KMO"                   | "KPTN"             |
| [107] | "KSR1"                  | "KYNU"             |
| [109] | "LCAT"                  | "LEP"              |
| [111] | "LOC100505584 /// MT1E" | "LOC51145"         |
| [113] | "LOC652346 /// PML"     | "LPAR1"            |
| [115] | "LPAR6"                 | "LPHN3"            |
| [117] | "LTK"                   | "MAP7"             |
| [119] | "MAST3"                 | "MDC1"             |
| [121] | "MDK"                   | "MET"              |
| [123] | "METTL0D"               | "METTL7A"          |
| [125] | "MGP"                   | "MICB"             |
| [127] | "MR1"                   | "MSR1"             |
| [129] | "MT1F"                  | "MT1G"             |
| [131] | "MT1H"                  | "MT1P2"            |
| [133] | "MT1X"                  | "MTHFD2"           |
| [135] | "MTHFR"                 | "MTPP"             |
| [137] | "MYO7A"                 | "MYOF"             |
| [139] | "MZF1"                  | "NECAB2"           |
| [141] | "NEUROD2"               | "NF2"              |
| [143] | "NFATC4"                | "NR2F6"            |
| [145] | "NR4A2"                 | "NSUN7"            |
| [147] | "NTRK3"                 | "OMD"              |
| [149] | "OSBP17"                | "P2RX7"            |
| [151] | "P2RY14"                | "P2RY6"            |
| [153] | "PADI4"                 | "PARP11"           |
| [155] | "PBXIP1"                | "PDZD8"            |
| [157] | "PEX7"                  | "PGAP1"            |
| [159] | "PLEKHG3"               | "PLOD2"            |
| [161] | "POLR3G"                | "PPY2"             |
| [163] | "PRB4"                  | "PRKDC"            |
| [165] | "PSG2"                  | "PTP4A1"           |
| [167] | "PTPRO"                 | "RAB27B"           |
| [169] | "RANBP1"                | "RBEK1"            |

[171] "RBM17" "RBMS2"  
 [173] "RCN3" "RFX2"  
 [175] "RGL1" "RHAG"  
 [177] "RHBDF1" "RIN2"  
 [179] "RPGRIP1" "RRAS"  
 [181] "SCAND2" "SCN11A"  
 [183] "SDC2" "SEC24D"  
 [185] "SEC61A2" "SECTM1"  
 [187] "SEPP1" "SEPT4"  
 [189] "SLAMP7" "SLC12A8"  
 [191] "SLC25A24" "SLC27A3"  
 [193] "SLC38A3" "SLC5A7"  
 [195] "SLC6A2" "SLFN12"  
 [197] "SNRNF70" "SOBP"  
 [199] "SOX3" "SOX4"  
 [201] "SPTAM1" "SRBD1"  
 [203] "SYCP1" "SYN2"  
 [205] "TAP2" "TAZ"  
 [207] "TLR7" "TMEM62"  
 [209] "TMX1" "TNIP3"  
 [211] "TREX1" "TRIM21"  
 [213] "TSHR" "UBE4B"  
 [215] "VAMP4" "VRK2"  
 [217] "WSB2" "XAGE1A /// XAGE1B /// XAGE1C /// XAGE1D /// XAGE1E"  
 [219] "ZNF248"

\$Zhai

[1] "" "ADIPOR1" "ALPL" "ASCC2" "BSG" "CECR1" "CSDA"  
 [8] "CX3CR1" "DPYSL5" "ECGF1" "EEF1G" "EPB42" "FBXO7" "GIMAP4"  
 [15] "GPR175" "GSPT1" "GYPC" "HBD" "HBG1" "HBG2" "HIST2H2AA3"  
 [22] "HLA-F" "ICAM3" "IMPA2" "LOC100008589" "LOC100128326" "LOC100129681" "LOC100130914"  
 [29] "LOC100131164" "LOC100131726" "LOC100132394" "LOC100134530" "LOC100134634" "LOC389386" "LOC389599"  
 [36] "LOC401357" "LOC440313" "LOC440359" "LOC642357" "LOC642469" "LOC643319" "LOC643384"  
 [43] "LOC644852" "LOC645173" "LOC648390" "LOC729021" "LOC729660" "LOC730286" "MAP1S"  
 [50] "MT1A" "MUC6" "MYL12A" "NT5C3" "PI3" "PPM1F" "PRIC285"  
 [57] "RBM38" "RPS5" "SELENBP1" "SERPINA13" "SIGLEC14" "SLC25A37" "SLC25A39"  
 [64] "SNCA" "SORL1" "SPRYD3" "STRADB" "TBL1X" "TSPAN5" "TXNDC12"  
 [71] "TYMP" "UBXN6" "WDR40A"

\$CC\_svre\_ctrTang

[1] "AIF1" "ANKRD9" "ANP32E" "ATOX1" "B2M" "CAP1" "CCNA2" "CD274" "CD63"  
 [10] "CDCA8" "CLEC1B" "CLEC4D" "CLU" "CTSIF" "DBI" "DHRS3" "DTX3L" "EVI2A"  
 [19] "FXYS5" "GBP2" "GBP3" "GGH" "GNG11" "GP1BB" "GRN" "GSN" "HEBP2"  
 [28] "HIST1H2AB" "HIST1H2AG" "HIST1H2AK" "HK3" "HMGB2" "HSPA8" "HVCN1" "ITGA2B" "ITGB3"  
 [37] "LCN2" "LILRA6" "MCEMP1" "MXD1" "MYL9" "MZB1" "NDRG2" "NIP1A" "NOG"  
 [46] "PABPC4" "PLVAP" "RASA4" "S100A6" "S100A9" "SELL" "SRGAP2" "SRGN" "STIL"  
 [55] "STMN1" "TGFB1" "TNNT1" "TPM4" "UBE2C" "VIM" "VPREB3" "VPS51"

\$CC\_svre\_ctrWoods

[1] "APOBEC1" "CBR1" "CFB" "DUSP3" "GADD45B" "GUCY1B3" "HPSE" "LGALS3BP" "MMP9" "MMRN1"  
 [11] "MYH9" "PSMB9" "SDC3" "SORT1" "TDRD7" "TRAFD1"

\$CC\_svre\_ctrZhai

[1] "ADAR" "BCL2L1" "GBP4" "GBP5" "GZMB" "HAGH" "TAGLN2" "TESC" "TMEM140"

\$TangWoods

[1] "AIM2" "ANXA3" "APOBEC3A" "APOL6" "C1QA" "C2" "C3AR1" "CCRL2" "CXCR3" "EPN2"  
 [11] "ETV7" "FHL2" "FKBP5" "GYPA" "HIST1H4H" "IFIT5" "ITPR3" "LEF1" "LHFPL2" "MAP2K6"  
 [21] "MARCO" "MS4A4A" "MT2A" "NDC80" "NMI" "NOV" "PML" "PTGER4" "SAMD4A" "SGK1"  
 [31] "SIGLEC1" "SP100" "SPTLC2" "SSB" "TCN1" "TFEC" "THBD" "TMEM51" "TOR1B" "TRIM14"  
 [41] "ZC3HAV1" "ZCCHC2"

\$TangZhai

[1] "ADM" "DDX60L" "DYNLT1" "EEF2" "EIF3L" "ELF1" "EMR3" "EPST11" "HES4" "IFI30"  
[11] "NCOA7" "RNASE2" "RPS3" "RPS4X" "SHISA5" "TNFSF13B"

\$WoodsZhai

[1] "CTSL1" "DRAP1" "LAMP3" "MAFB" "PHF11" "TMEM123" "UBE2L6" "WARS"

\$CC\_svre\_ctrTangWoods

[1] "AGRN" "CIQB" "CD38" "CLIC4" "DDX58" "HP" "LILRB4" "LMNB1" "RECK" "SOCS1" "SP140" "TCN2" "UBE2S"

\$CC\_svre\_ctrTangZhai

[1] "CASP1" "CMPK2" "FBXO6" "IFITM3" "IRF9" "PARP10" "PARP14" "PARP9" "RNF213" "S100A8" "SAMD9L"

\$CC\_svre\_ctrWoodsZhai

[1] "CXCL10" "DPEP2" "LGALS9" "LMO2" "MX2" "PARP12" "PSME2" "SP110" "STAT2"

\$TangWoodsZhai

[1] "BLVRA" "CEACAM1" "CHMP5" "DDX60" "DHRS9" "FAM46A" "FCGR1B" "GBP1" "GLRX" "HERC5" "HERC6"  
[12] "IFI16" "IFI44L" "IFI6" "IL1RN" "ISG20" "LAP3" "OAS1" "OASL" "OTOF" "RSAD2" "SAMD9"  
[23] "SCARB2" "SCO2" "SPATS2L" "STAT1" "TIMM10" "TNFAIP6" "TNFSF10" "TRIM2" "TRIM5" "VAMP5"

\$CC\_svre\_ctrTangWoodsZhai

[1] "BST2" "DHX58" "EIF2AK2" "IFI27" "IFI35" "IFI44" "IFIH1" "IFIT1" "IFIT2" "IFIT3"  
[11] "IFITM1" "IRF7" "ISG15" "LY6E" "MX1" "OAS2" "OAS3" "PLAC8" "PLSCR1" "RTP4"  
[21] "SAT1" "SERPING1" "TAP1" "USP18" "XAF1" "ZBP1"
